# Supplementary material for: Theoretical and experimental studies on the structure–property relationship of chiral N,N′-dioxide–metal catalysts probed by the carbonyl–ene reaction of isatin
Source: Royal Society of Chemistry journal article supplement (doi:10.1039/c7cy00322f), 2017-01-01
Supplement: c7cy00322f1.pdf [file c7cy00322f1.pdf]

# Theoretical and Experimental Studies on the Structure-property Relationship of Chiral *N,N'*-dioxide-metal Catalysts Probed by Carbonyl-ene Reaction of Isatin

Junming Wang, Yini Zuo, Changwei Hu, and Zhishan Su\*

*Key Laboratory of Green Chemistry and Technology, Ministry of Education, College of Chemistry, Sichuan University, Chengdu, Sichuan, 610064 (P. R. China)*

Email: suzhishan@scu.edu.cn

## Supporting Information :

- Figure S1.** The percent of Mg ion coordination sphere shielded by ligand L3a (blue area) and the corresponding G-parameter  $G(L3a)=75.72\%$ . .....3
- Scheme S1.** Plot of difference map of electron density(DED) for L3a-Mg(II)-COM obtained by Mutilwfn program. The solid and dashed contour lines exhibit where electron density is increased and decreased, respectively.....3
- Figure S2.** Correlation between interaction energy ( $\Delta E_{int}$ ) of fragments and C=O stretching frequency of R1a ( $\nu_{C=O}$ ,  $cm^{-1}$ ) in  $L_m$ -Mg(II)-COM ( $m=1\sim 5$ ). The correlation equation is  $\nu_{C=O} = 0.80\Delta E_{int} + 1766.80$ ,  $R^2=0.90$ .....3
- Table S1.** Energy Decomposition Analysis (EDA) for two competing TSs in chiral-controlling step (C-C bond formation step) *via* two pathways (*si*-face attack and *re*-face attack) catalyzed by  $L_m$ -Mg(II) catalysts( $m=1\sim 5$ ). The energies are in  $kcal\ mol^{-1}$ .....4
- Figure S3.** Activation strain analysis of carbonyl-ene reaction between *N*-methyl-protected isatin (R1a) and 2-methoxypropene (R2) catalyzed by L1-Mg(II)~L5-Mg(II) catalyst. i) Evolution of  $\Delta E$ ,  $\Delta E_{int}$  and  $\Delta E_{strain}$  along reaction coordinate(a, c, e, g); ii) Evolution of  $\Delta E_{strain}$  of three energy components along reaction coordinate(b, d, f, h).....7
- Table S2.** Results of Energy Decomposition Analysis(EDA) and Activation Strain Model (ASM) as well as the corresponding G-parameter(%) for hexacoordinate complexes(L3a~L3d). The energies are in  $kcal\ mol^{-1}$ . .....7
- Table S3.** Results of Activation Strain Model (ASM) for two competing TSs in chiral-controlling step(C-C bond formation step) *via* two competing pathways(*si*-face attack and *re*-face attack)

|                                                                                                                                                                                                                                                                                                               |    |
|---------------------------------------------------------------------------------------------------------------------------------------------------------------------------------------------------------------------------------------------------------------------------------------------------------------|----|
| catalyzed by L3a-Mg(II)~L3d-Mg(II) catalysts. The energies are in kcal mol <sup>-1</sup> . .....                                                                                                                                                                                                              | 8  |
| <b>Figure S4.</b> Comparison of the optimized geometries of hexacoordinate L3a-Ca(II)(a and b) and L3a-Mg(II) complexes(c) containing 4-bromoisatin or isatin in bidentate model. Their relative Gibbs free energies difference are in kcal mol <sup>-1</sup> . .....                                         | 9  |
| <b>Table S4.</b> Selected structural parameter of the monodentate and bidentate complexes formed by 4-bromoisatin(R1a) or isatin (without Br substituent) towards L3a-M(II)(M=Ca and Mg) complexes, and their difference of relative Gibbs free energies ( $\Delta\Delta G$ , kcal mol <sup>-1</sup> ). ..... | 9  |
| <b>Table S5.</b> Relative Gibbs free energy of transition states ( $\Delta G$ , kcal mol <sup>-1</sup> ) in asymmetric carbonyl-ene reaction of 2-methoxypropene towards 4-Br-substituted isatin (R1a) or isatin (without Br substituent) catalyzed by L3a-Ca(II) catalyst. ....                              | 10 |
| <b>Figure S5.</b> Optimized geometries of competing transition states in the carbonyl-ene reaction between isatin without Br substituent and R2 catalyzed by L3a-Ca(II) complex. Relative energies are in kcal mol <sup>-1</sup> . .....                                                                      | 11 |
| <b>Figure S6.</b> ESI mass spectra in positive-ion mode for the 1:1 L3a:Ca(OTf) <sub>2</sub> mixture, HRMS: [L3a+Ca(II)+OTf] <sup>+</sup> (m/z=889.4064, calcd:889.4068). .....                                                                                                                               | 12 |
| <b>Figure S7.</b> Optimized geometries of two competing transition states in the carbonyl-ene reaction between R1b and R2 catalyzed by L1-Mg(II) complex. Relative energies are in kcal mol <sup>-1</sup> . .....                                                                                             | 12 |
| <b>Table S6.</b> Comparison of the results of Activation Strain Model (ASM) and Energy Decomposition Analysis (EDA) for carbonyl-ene reaction of R2 towards R1a or R1b catalyzed by L1-Mg(II). The energies are in kcal mol <sup>-1</sup> . .....                                                             | 13 |
| <b>Figure S8.</b> The strain energy( $\Delta E_{\text{strain}(R2)}$ ) of R2 along reaction coordinates of two competing pathways ( <i>re</i> -face attack and <i>si</i> -face attack) in the carbonyl-ene reactions of 2-methoxypropene(R2) towards R1a or R1b, respectively. ....                            | 13 |
| <b>Cartesian coordinates of all stationary points</b> .....                                                                                                                                                                                                                                                   | 14 |

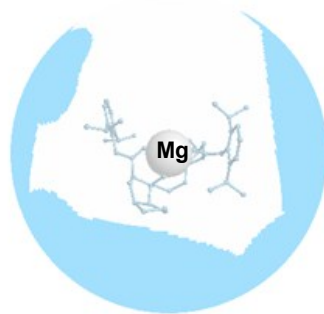

L3a-Mg(II)  
G(L3a)=75.72%

**Figure S1.** The percent of Mg ion coordination sphere shielded by ligand L3a (blue area) and the corresponding G-parameter G(L3a)=75.72 %.

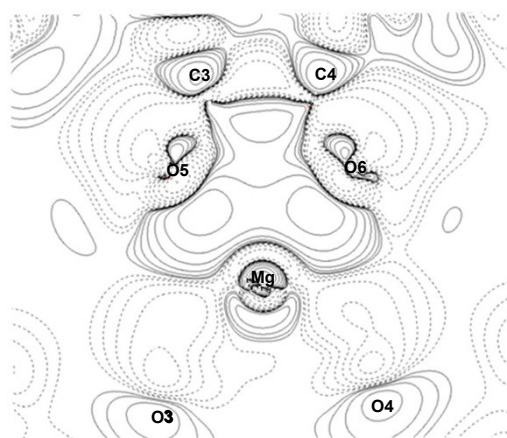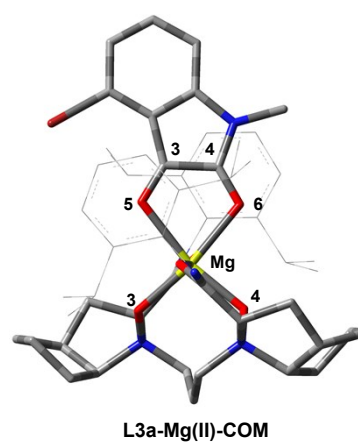

**Scheme S1.** Plot of difference map of electron density(DED) for L3a-Mg(II)-COM obtained by Mutilwfn program. The solid and dashed contour lines exhibit where electron density is increased and decreased, respectively.

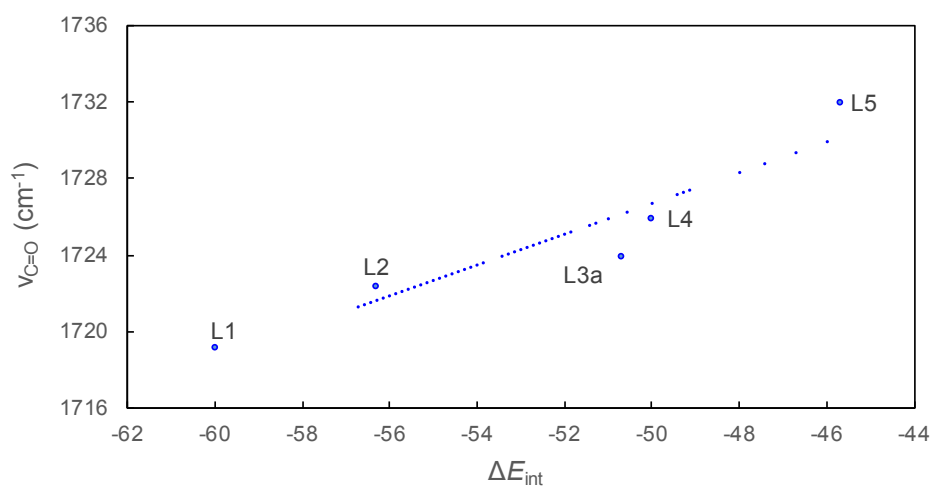

**Figure S2.** Correlation between interaction energy ( $\Delta E_{int}$ ) of fragments and C=O stretching frequency of R1a ( $\nu_{C=O}$ , cm<sup>-1</sup>) in Lm-Mg(II)-COM (m=1~5). The correlation equation is  $\nu_{C=O} = 0.80\Delta E_{int} + 1766.80$ ,  $R^2=0.90$ .

**Table S1.** Energy Decomposition Analysis (EDA) for two competing TSs in chiral-controlling step (C-C bond formation step) *via* two pathways (*si*-face attack and *re*-face attack) catalyzed by Lm-Mg(II) catalysts(m=1~5). The energies are in kcal mol<sup>-1</sup>.

| Catalyst          | Path            | $\Delta E^\ddagger_{\text{Pauli}}$ | $\Delta V^\ddagger_{\text{elstat}}$ | $\Delta E^\ddagger_{\text{oi}}$ | $\Delta E^\ddagger_{\text{disp}}$ | <sup>a</sup> $\Delta\Delta G^\ddagger$ |
|-------------------|-----------------|------------------------------------|-------------------------------------|---------------------------------|-----------------------------------|----------------------------------------|
| <b>L1-Mg(II)</b>  | <i>si</i> -face | 137.0                              | -70.2                               | -86.2                           | -19.8                             | -0.7                                   |
|                   | <i>re</i> -face | 119.5                              | -63.4                               | -76.0                           | -15.7                             |                                        |
| <b>L2-Mg(II)</b>  | <i>si</i> -face | 144.3                              | -73.9                               | -90.9                           | -19.7                             | -0.9                                   |
|                   | <i>re</i> -face | 128.4                              | -66.9                               | -78.9                           | -20.2                             |                                        |
| <b>L3a-Mg(II)</b> | <i>si</i> -face | 161.6                              | -81.6                               | -100.7                          | -22.3                             | 2.9                                    |
|                   | <i>re</i> -face | 143.0                              | -72.9                               | -86.8                           | -21.0                             |                                        |
| <b>L4-Mg(II)</b>  | <i>si</i> -face | 171.2                              | -85.6                               | -106.7                          | -24.7                             | 5.2                                    |
|                   | <i>re</i> -face | 162.5                              | -82.5                               | -99.3                           | -20.1                             |                                        |
| <b>L5-Mg(II)</b>  | <i>si</i> -face | 159.7                              | -80.8                               | -96.2                           | -26.1                             | 3.2                                    |
|                   | <i>re</i> -face | 158.2                              | -80.5                               | -95.9                           | -21.1                             |                                        |

<sup>a</sup> the relative Gibbs energy of transition state for *si*-face attack is set to zero.

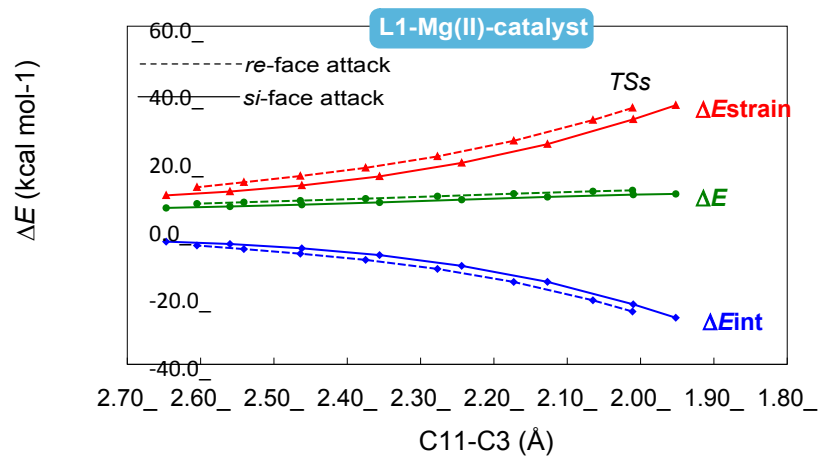

(a)

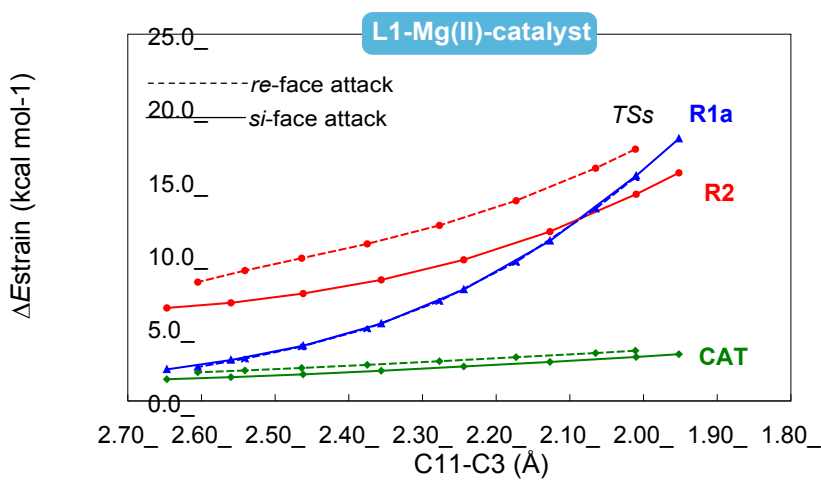

(b)

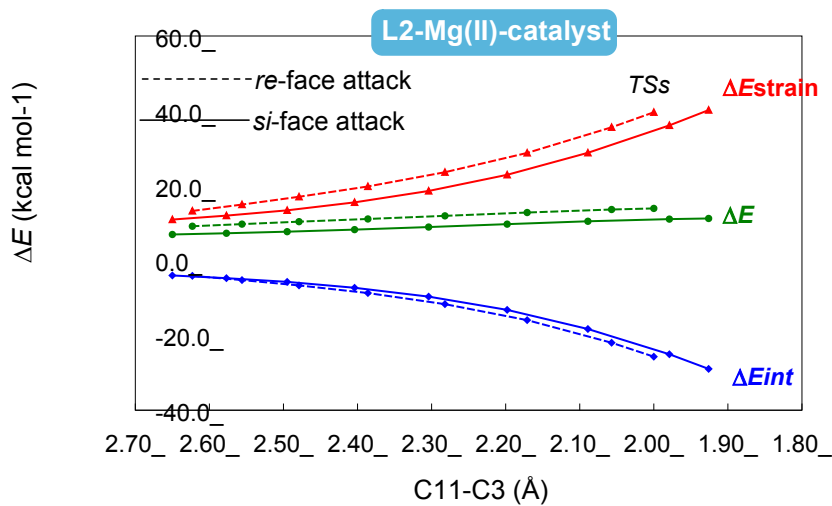

(c)

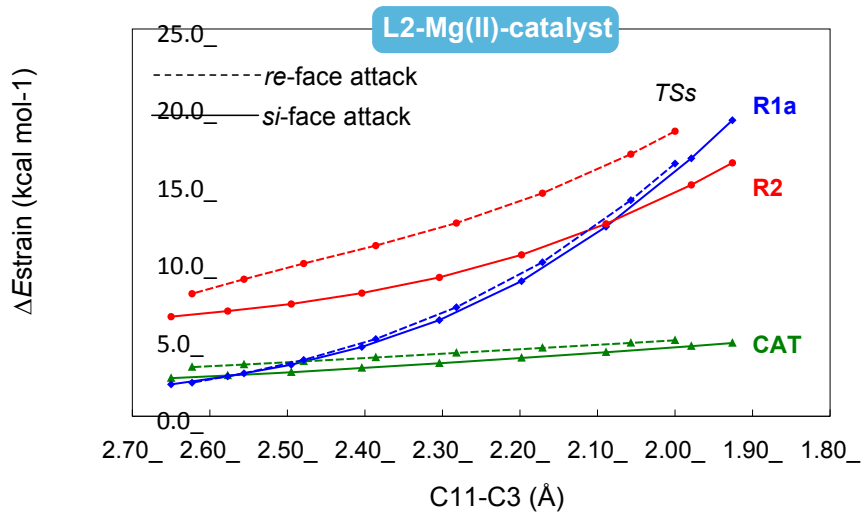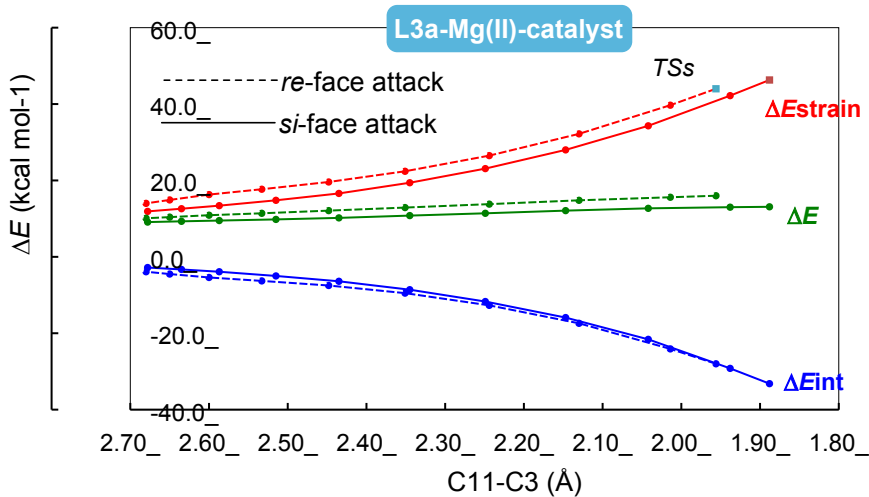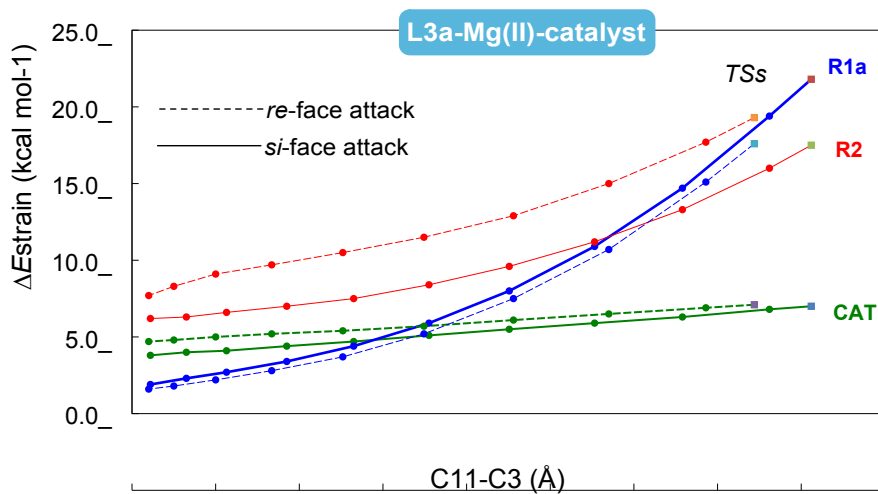

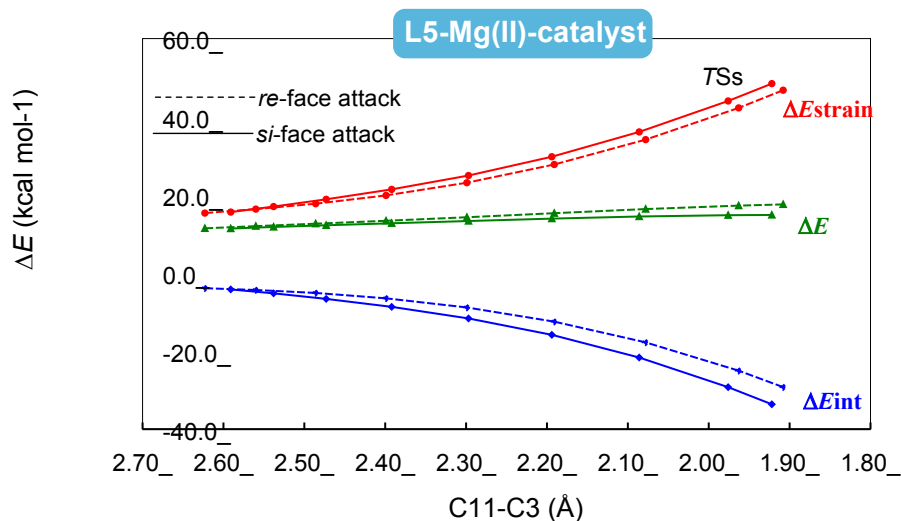

(g)

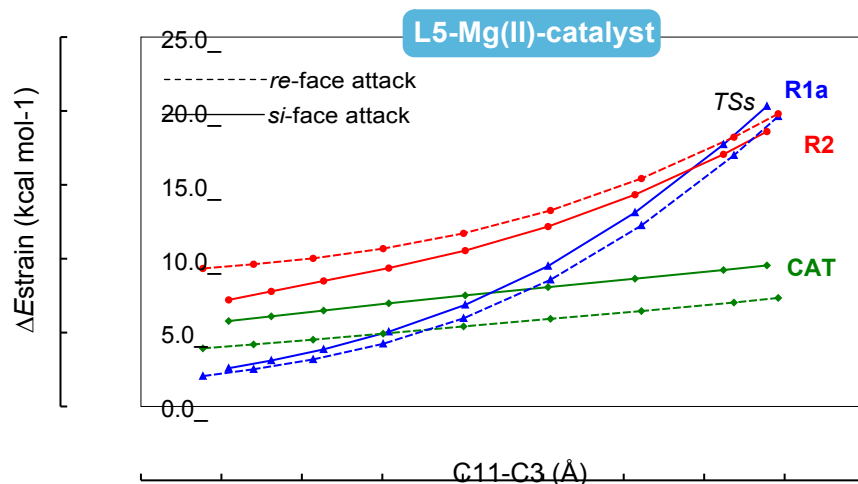

(h)

**Figure S3.** Activation strain analysis of carbonyl-ene reaction between *N*-methyl-protected isatin (R1a) and 2-methoxypropene (R2) catalyzed by L1-Mg(II)~L5-Mg(II) catalyst. i) Evolution of  $\Delta E$ ,  $\Delta E_{\text{int}}$  and  $\Delta E_{\text{strain}}$  along reaction coordinate(a, c, e, g); ii) Evolution of  $\Delta E_{\text{strain}}$  of three energy components along reaction coordinate(b, d, f, h).

**Table S2.** Results of Energy Decomposition Analysis(EDA) and Activation Strain Model (ASM) as well as the corresponding G-parameter(%) for hexacoordinate complexes(L3a~L3d). The energies are in kcal mol<sup>-1</sup>.

| Species        | G(L)  | $\Delta E_{\text{int}}$ | $\Delta E_{\text{strain}}$ | $\Delta E_{\text{Pauli}}$ | $\Delta V_{\text{elstat}}$ | $\Delta E_{\text{oi}}$ | $\Delta E_{\text{disp}}$ |
|----------------|-------|-------------------------|----------------------------|---------------------------|----------------------------|------------------------|--------------------------|
| L3a-Mg(II)-COM | 72.18 | -50.7                   | 8.8                        | 41.0                      | -52.6                      | -30.1                  | -17.7                    |
| L3b-Mg(II)-COM | 72.82 | -51.3                   | 7.9                        | 40.8                      | -53.8                      | -29.6                  | -18.3                    |
| L3c-Mg(II)-COM | 70.34 | -54.6                   | 8.2                        | 38.2                      | -54.0                      | -30.4                  | -14.1                    |
| L3d-Mg(II)-COM | 75.31 | -50.2                   | 8.9                        | 43.6                      | -54.6                      | -29.9                  | -20.9                    |

**Table S3.** Results of Activation Strain Model (ASM) for two competing TSs in chiral-controlling step(C-C bond formation step) *via* two competing pathways(*si*-face attack and *re*-face attack) catalyzed by L3a-Mg(II)~L3d-Mg(II) catalysts. The energies are in kcal mol<sup>-1</sup>.

| Catalyst   | Paths           | $\Delta E_{\text{strain}}^{\ddagger}$ |      |      |      | $\Delta E_{\text{int}}^{\ddagger}$ |
|------------|-----------------|---------------------------------------|------|------|------|------------------------------------|
|            |                 | CAT                                   | R1a  | R2   | Sum  |                                    |
| L3a-Mg(II) | <i>si</i> -face | 7.0                                   | 21.8 | 17.5 | 46.3 | -33.2                              |
|            | <i>re</i> -face | 7.1                                   | 17.6 | 19.3 | 44.0 | -28.0                              |
| L3b-Mg(II) | <i>si</i> -face | 5.1                                   | 18.4 | 17.7 | 41.1 | -32.8                              |
|            | <i>re</i> -face | 5.7                                   | 17.9 | 18.9 | 42.5 | -29.7                              |
| L3c-Mg(II) | <i>si</i> -face | 5.8                                   | 19.6 | 16.6 | 41.9 | -31.4                              |
|            | <i>re</i> -face | 5.6                                   | 17.0 | 18.3 | 40.9 | -25.5                              |
| L3d-Mg(II) | <i>si</i> -face | 7.9                                   | 21.6 | 17.0 | 46.6 | -33.5                              |
|            | <i>re</i> -face | 7.9                                   | 19.0 | 19.2 | 46.1 | -29.9                              |

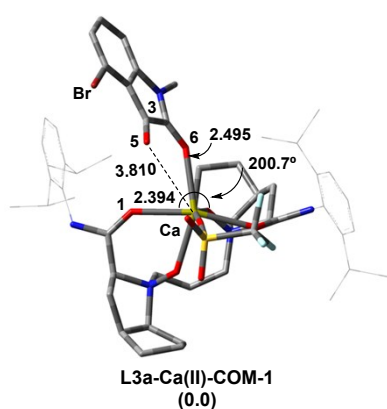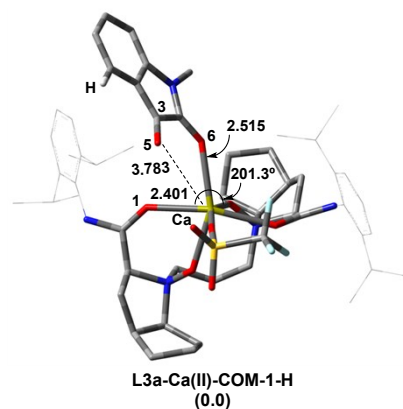

L3a-Ca(II) complex (*monodentate model*)  
(a)

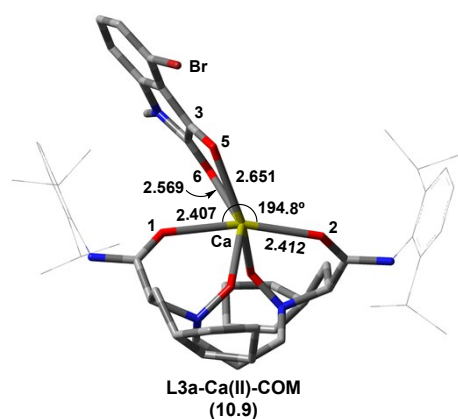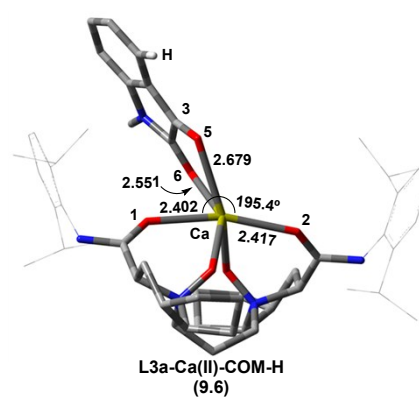

L3a-Ca(II) complex (*bidentate model*)  
(b)



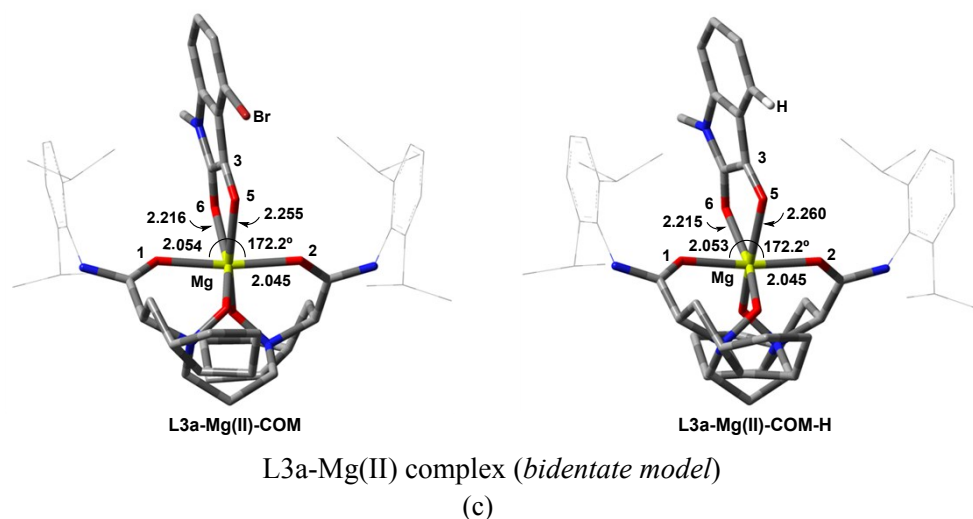

**Figure S4.** Comparison of the optimized geometries of hexacoordinate L3a-Ca(II)(a and b) and L3a-Mg(II) complexes(c) containing 4-bromoisatin or isatin in bidentate model. Their relative Gibbs free energies difference are in kcal mol<sup>-1</sup>.

**Table S4.** Selected structural parameter of the monodentate and bidentate complexes formed by 4-bromoisatin(R1a) or isatin (without Br substituent) towards L3a-M(II)(M=Ca and Mg) complexes, and their difference of relative Gibbs free energies ( $\Delta\Delta G$ , kcal mol<sup>-1</sup>).

| Model        | Substituent | Complex            | Distance(Å)         |                               |                       | Angle(°)           |            | <sup>b</sup> $\Delta\Delta G$ |
|--------------|-------------|--------------------|---------------------|-------------------------------|-----------------------|--------------------|------------|-------------------------------|
|              |             |                    | R <sub>(C)O-M</sub> | <sup>a</sup> R <sub>O-M</sub> | R <sub>ipr...C3</sub> | $\alpha_{O1-M-O2}$ | $\theta_1$ |                               |
| Mono-dentate | Br          | L3a-Ca(II)-COM-1   | 2.401               | 2.495                         | 4.429                 | 200.7              | 37.1       | -                             |
|              | H           | L3a-Ca(II)-COM-1-H | 2.411               | 2.515                         | 4.211                 | 201.3              | 37.3       | -                             |
| Bidentate    | Br          | L3a-Ca(II)-COM     | 2.419               | 2.610                         | 4.103                 | 194.8              | 44.5       | 10.9                          |
|              | H           | L3a-Ca(II)-COM-H   | 2.410               | 2.615                         | 4.081                 | 195.4              | 43.9       | 9.6                           |
| Bidentate    | Br          | L3a-Mg(II)-COM     | 2.050               | 2.221                         | 3.909                 | 172.2              | 22.4       | -                             |
|              | H           | L3a-Mg(II)-COM-H   | 2.049               | 2.238                         | 3.939                 | 172.2              | 20.6       | -                             |

<sup>a</sup> the distance between ligated O atom in carbonyl substrate and metal center in hexacoordinate complexes (O<sub>6</sub>-Ca distance for monodentate complex and the average O-metal distance for bidentate complex).

<sup>b</sup> the relative energy of monodentate complexes L3a-Ca(II)-COM-1 or L3a-Ca(II)-COM-1-H are set to zero.

**Table S5.** Relative Gibbs free energy of transition states ( $\Delta G$ , kcal mol<sup>-1</sup>) in asymmetric carbonyl-ene reaction of 2-methoxypropene towards 4-Br-substituted isatin (R1a) or isatin (without Br substituent) catalyzed by L3a-Ca(II) catalyst.

| Model                        | Substituent | Transition state              | $\Delta G$ | <sup>a</sup> $\Delta\Delta G$ | Mechanism          |
|------------------------------|-------------|-------------------------------|------------|-------------------------------|--------------------|
| Mono-dentate                 | Br          | L3a-Ca(II)-TS- <i>si</i> -1   | 22.3       | 1.0                           | One-step two-stage |
|                              |             | L3a-Ca(II)-TS- <i>re</i> -1   | 23.3       |                               |                    |
|                              | H           | L3a-Ca(II)-TS- <i>si</i> -1-H | 23.0       |                               |                    |
|                              |             | L3a-Ca(II)-TS- <i>re</i> -1-H | 21.6       | 1.4                           |                    |
| Bidentate                    | Br          | L3a-Ca(II)-TS1- <i>si</i>     | 26.3       | 2.2                           | Stepwise           |
|                              |             | L3a-Ca(II)-TS1- <i>re</i>     | 28.5       |                               |                    |
|                              |             | L3a-Ca(II)-TS2- <i>si</i>     | 26.5       |                               |                    |
|                              | H           | L3a-Ca(II)-TS2- <i>re</i>     | 30.8       |                               |                    |
|                              |             | L3a-Ca(II)-TS1- <i>si</i> -H  | 27.7       |                               |                    |
|                              |             | L3a-Ca(II)-TS1- <i>re</i> -H  | 31.3       | 3.6                           |                    |
|                              |             | L3a-Ca(II)-TS2- <i>si</i> -H  | 27.5       |                               |                    |
| L3a-Ca(II)-TS2- <i>re</i> -H | 32.1        |                               |            |                               |                    |

<sup>a</sup> the relative Gibbs free energy difference ( $\Delta\Delta G$ , kcal mol<sup>-1</sup>) of two competing transition states in chiral-controlling step (C-C bond formation step).

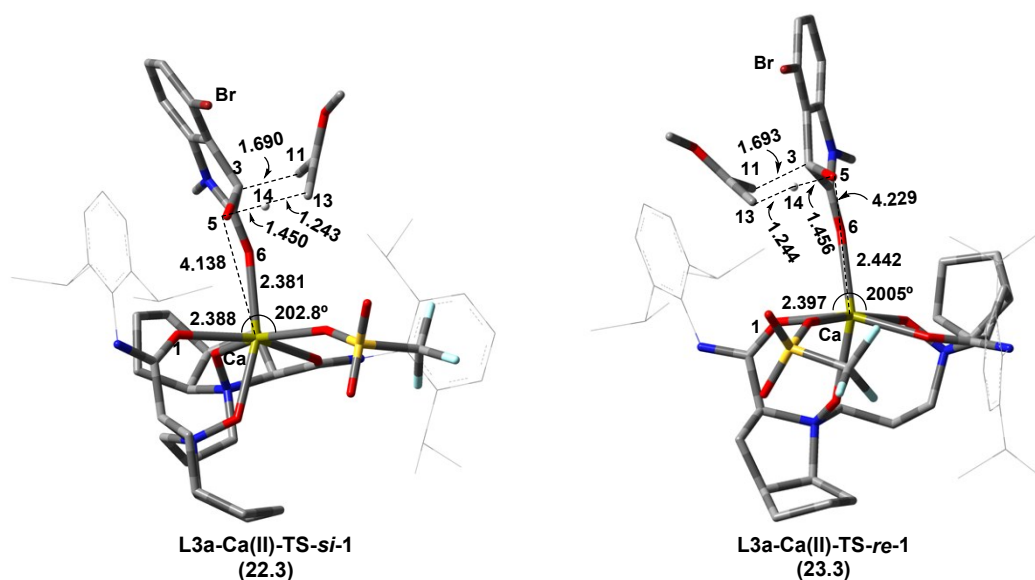

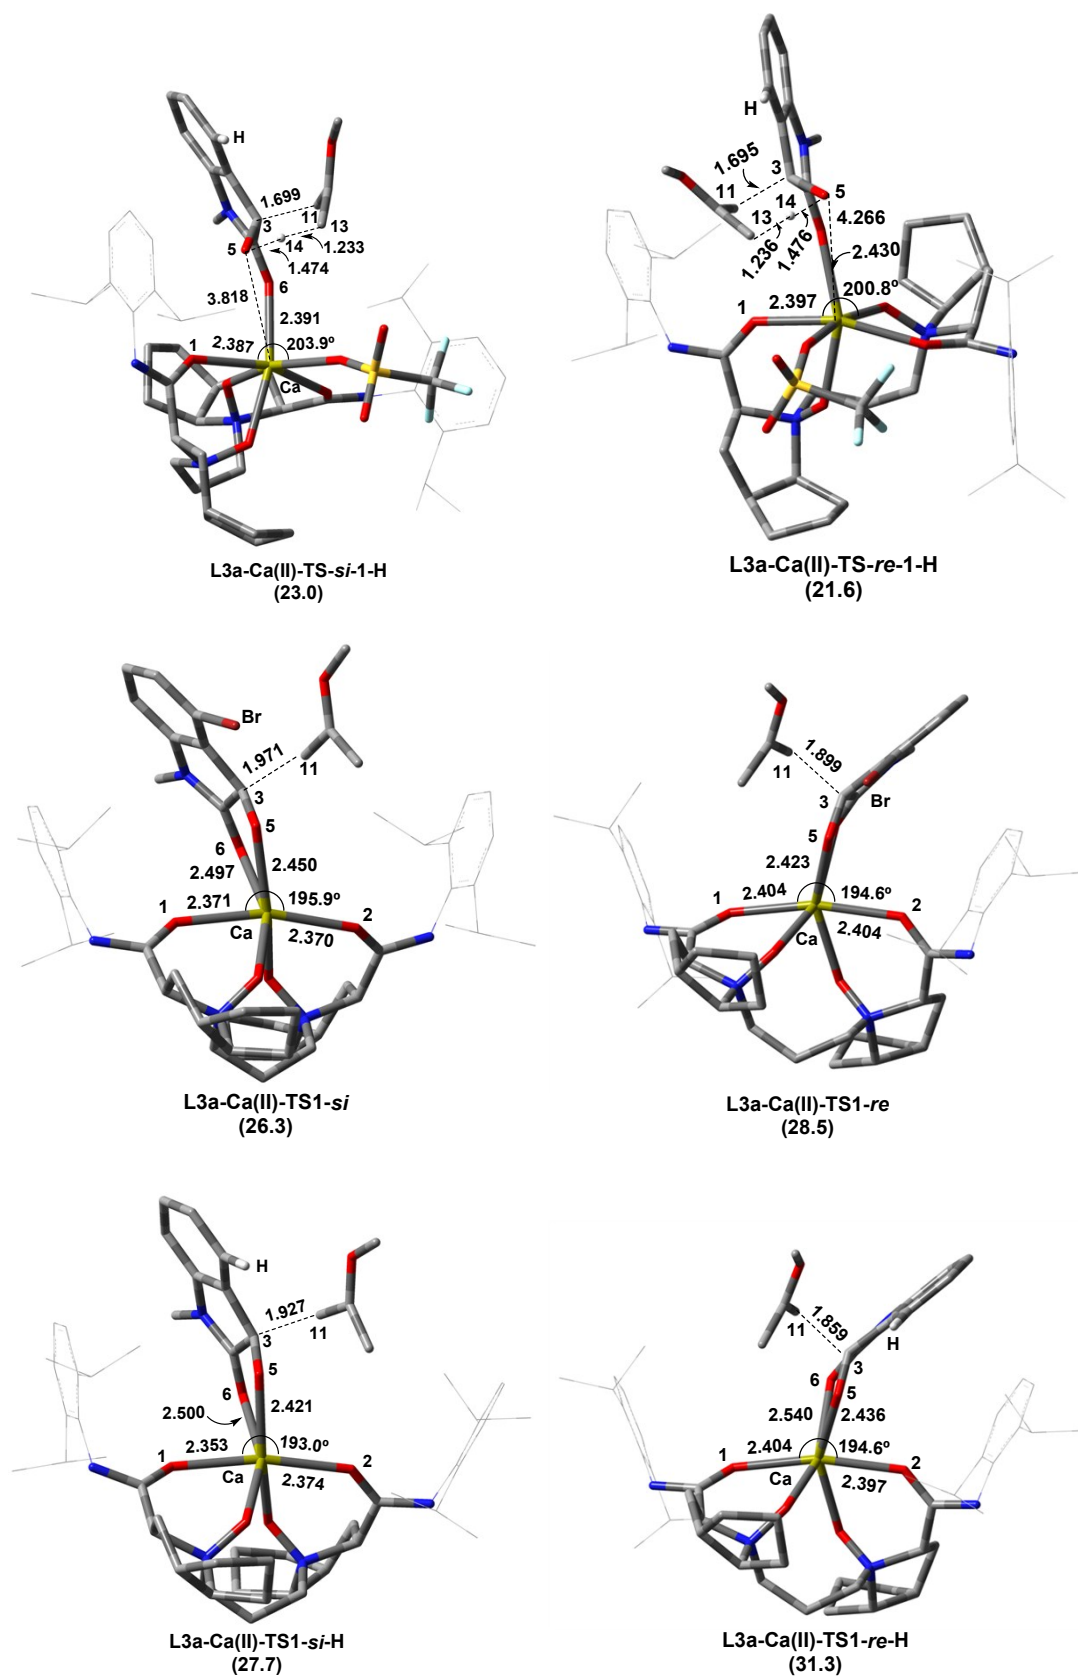

**Figure S5.** Optimized geometries of competing transition states in the carbonyl-ene reaction between isatin without Br substituent and R2 catalyzed by L3a-Ca(II) complex. Relative energies are in kcal mol<sup>-1</sup>.

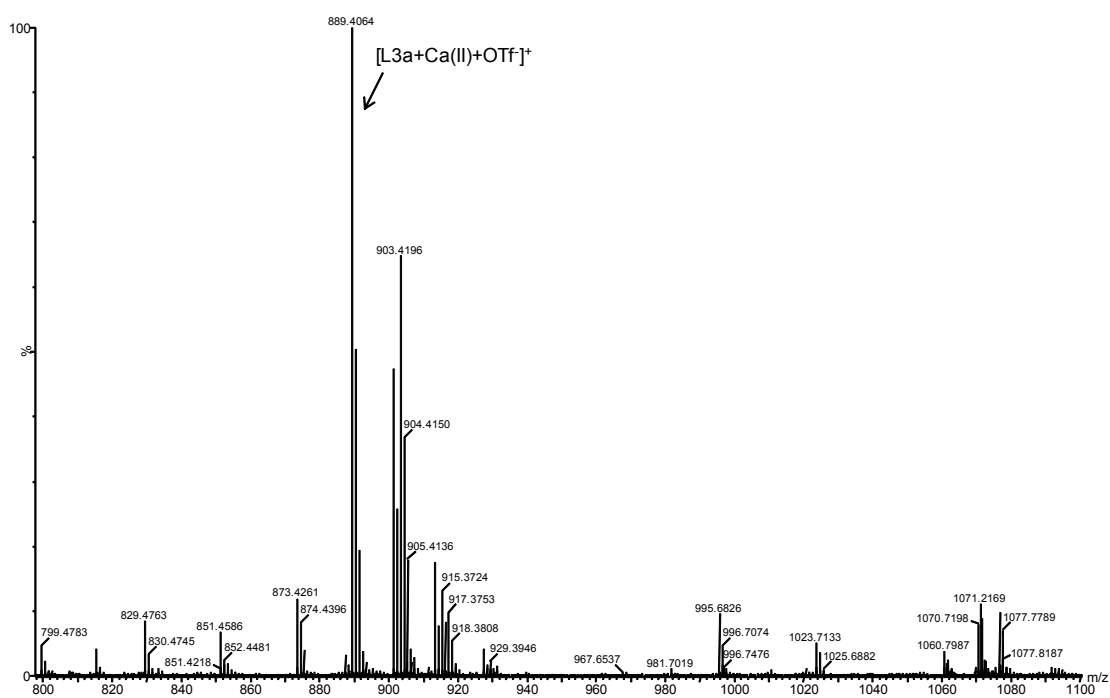

**Figure S6.** ESI mass spectra in positive-ion mode for the 1:1 L3a:Ca(OTf)<sub>2</sub> mixture, HRMS: [L3a+Ca(II)+OTf]<sup>+</sup> (m/z=889.4064, calcd:889.4068).

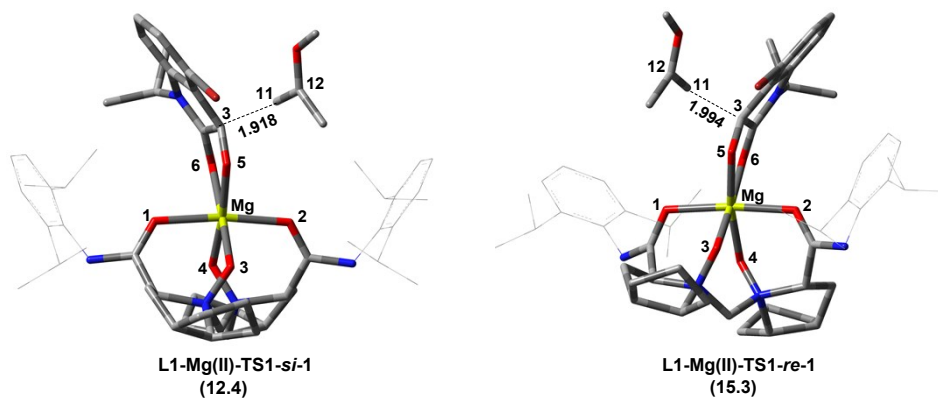

**Figure S7.** Optimized geometries of two competing transition states in the carbonyl-ene reaction between R1b and R2 catalyzed by L1-Mg(II) complex. Relative energies are in kcal mol<sup>-1</sup>.

**Table S6.** Comparison of the results of Activation Strain Model (ASM) and Energy Decomposition Analysis (EDA) for carbonyl-ene reaction of R2 towards R1a or R1b catalyzed by L1-Mg(II). The energies are in kcal mol<sup>-1</sup>.

| Species | Path            | $\Delta\Delta G^\ddagger$ | $\Delta E^\ddagger$ | ASM                                 |                                  |                                    | EDA                                 |                                 |                                   |
|---------|-----------------|---------------------------|---------------------|-------------------------------------|----------------------------------|------------------------------------|-------------------------------------|---------------------------------|-----------------------------------|
|         |                 |                           |                     | $\Delta E^\ddagger_{\text{strain}}$ | $\Delta E^\ddagger_{\text{int}}$ | $\Delta E^\ddagger_{\text{Pauli}}$ | $\Delta V^\ddagger_{\text{elstat}}$ | $\Delta E^\ddagger_{\text{oi}}$ | $\Delta E^\ddagger_{\text{disp}}$ |
| R1a     | <i>si</i> -face | 0.7                       | 10.4                | 36.6                                | -26.2                            | 137.0                              | -70.2                               | -86.2                           | -19.8                             |
|         | <i>re</i> -face |                           | 11.5                | 35.8                                | -24.4                            | 119.5                              | -63.4                               | -76.0                           | -15.7                             |
| R1b     | <i>si</i> -face | 2.9                       | 10.3                | 39.6                                | -29.3                            | 148.4                              | -75.3                               | -92.9                           | -20.4                             |
|         | <i>re</i> -face |                           | 12.9                | 39.1                                | -26.2                            | 126.1                              | -66.4                               | -79.3                           | -16.3                             |

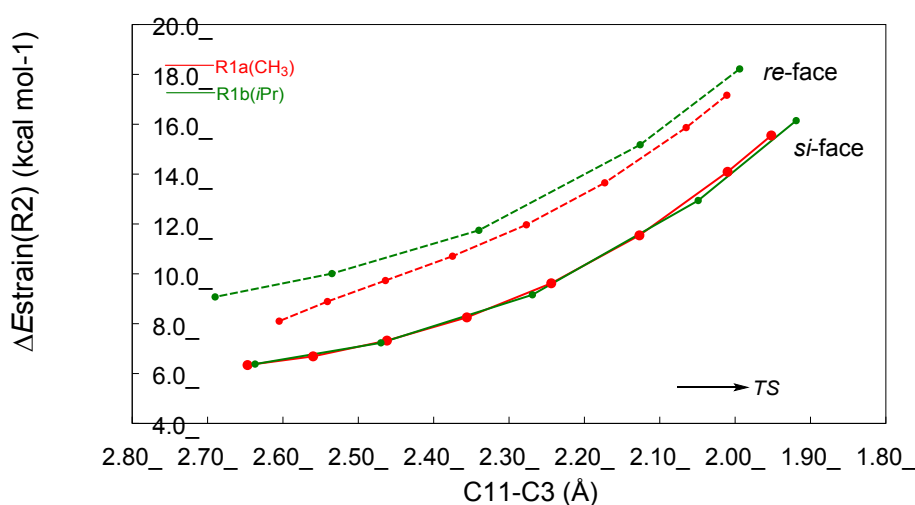

**Figure S8.** The strain energy( $\Delta E_{\text{strain}}(\text{R2})$ ) of R2 along reaction coordinates of two competing pathways (*re*-face attack and *si*-face attack) in the carbonyl-ene reactions of 2-methoxypropene(R2) towards R1a or R1b, respectively.

## Cartesian coordinates of all stationary points

### R1a

Zero-point correction= 0.13266 a.u.

Thermal correction to Gibbs Free Energy= 0.09442 a.u.

Sum of electronic and zero-point Energies= -3125.98903 a.u.

Sum of electronic and thermal Free Energies= -3126.02726 a.u.

The number of imaginary frequencies 0

Standard orientation

---

| Center<br>Number | Atomic<br>Number | Atomic<br>Type | Coordinates (Angstroms) |           |           |
|------------------|------------------|----------------|-------------------------|-----------|-----------|
|                  |                  |                | X                       | Y         | Z         |
| 1                | 6                | 0              | 2.185437                | -1.222830 | -0.002063 |
| 2                | 6                | 0              | 0.628349                | -1.339688 | -0.002308 |
| 3                | 6                | 0              | 0.146046                | 0.046681  | -0.002842 |
| 4                | 6                | 0              | 1.286672                | 0.884533  | -0.002641 |
| 5                | 7                | 0              | 2.467588                | 0.124190  | -0.002651 |
| 6                | 8                | 0              | 0.033245                | -2.397430 | -0.001448 |
| 7                | 6                | 0              | -1.122773               | 0.619171  | -0.000706 |
| 8                | 6                | 0              | 1.173202                | 2.268016  | -0.002034 |
| 9                | 8                | 0              | 2.979497                | -2.144665 | -0.000188 |
| 10               | 6                | 0              | 3.811090                | 0.677536  | 0.006808  |
| 11               | 1                | 0              | 3.973021                | 1.281457  | 0.905658  |
| 12               | 1                | 0              | 4.511595                | -0.158846 | 0.002451  |
| 13               | 1                | 0              | 3.979401                | 1.296315  | -0.880615 |
| 14               | 6                | 0              | -1.264942               | 2.007733  | -0.000533 |
| 15               | 6                | 0              | -0.119497               | 2.809417  | -0.001014 |
| 16               | 35               | 0              | -2.678212               | -0.477550 | 0.001508  |
| 17               | 1                | 0              | -2.250840               | 2.458605  | -0.000203 |
| 18               | 1                | 0              | -0.238121               | 3.889189  | -0.001498 |
| 19               | 1                | 0              | 2.045806                | 2.911531  | -0.002924 |

---

### R1b

Zero-point correction= 0.18854 a.u.

Thermal correction to Gibbs Free Energy= 0.14609 a.u.

Sum of electronic and zero-point Energies= -3204.59664 a.u.

Sum of electronic and thermal Free Energies= -3204.63908 a.u.

The number of imaginary frequencies 0

Standard orientation

---

| Center<br>Number | Atomic<br>Number | Atomic<br>Type | Coordinates (Angstroms) |   |   |
|------------------|------------------|----------------|-------------------------|---|---|
|                  |                  |                | X                       | Y | Z |

---

|    |    |   |           |           |           |
|----|----|---|-----------|-----------|-----------|
| 1  | 6  | 0 | -1.435591 | -1.618773 | -0.010835 |
| 2  | 6  | 0 | 0.115293  | -1.494512 | -0.010192 |
| 3  | 6  | 0 | 0.374786  | -0.052849 | -0.005229 |
| 4  | 6  | 0 | -0.881851 | 0.604795  | -0.009181 |
| 5  | 7  | 0 | -1.936865 | -0.333663 | -0.009790 |
| 6  | 8  | 0 | 0.867854  | -2.447427 | -0.012977 |
| 7  | 6  | 0 | 1.551140  | 0.692684  | -0.000869 |
| 8  | 6  | 0 | -0.951962 | 1.994235  | -0.015580 |
| 9  | 8  | 0 | -2.069075 | -2.658692 | -0.010179 |
| 10 | 6  | 0 | -3.393815 | -0.077017 | 0.007581  |
| 11 | 1  | 0 | -3.816233 | -1.085496 | 0.002899  |
| 12 | 6  | 0 | 1.499330  | 2.085988  | -0.003113 |
| 13 | 6  | 0 | 0.250735  | 2.712634  | -0.011251 |
| 14 | 35 | 0 | 3.247007  | -0.173622 | 0.007496  |
| 15 | 1  | 0 | 2.411006  | 2.672340  | 0.000612  |
| 16 | 1  | 0 | 0.210776  | 3.798198  | -0.015124 |
| 17 | 1  | 0 | -1.895574 | 2.523468  | -0.024292 |
| 18 | 6  | 0 | -3.868371 | 0.637362  | -1.262573 |
| 19 | 1  | 0 | -4.963579 | 0.667390  | -1.269411 |
| 20 | 1  | 0 | -3.506844 | 1.668270  | -1.325900 |
| 21 | 1  | 0 | -3.537714 | 0.099343  | -2.157464 |
| 22 | 6  | 0 | -3.839596 | 0.611844  | 1.302392  |
| 23 | 1  | 0 | -4.934210 | 0.650397  | 1.330632  |
| 24 | 1  | 0 | -3.496973 | 0.050924  | 2.178577  |
| 25 | 1  | 0 | -3.468680 | 1.638188  | 1.383993  |

## R2

Zero-point correction= 0.11206 a.u.

Thermal correction to Gibbs Free Energy= 0.08267a.u.

Sum of electronic and zero-point Energies= -232.41202 a.u.

Sum of electronic and thermal Free Energies= -232.44141 a.u.

The number of imaginary frequencies 0

Standard orientation

| Center<br>Number | Atomic<br>Number | Atomic<br>Type | Coordinates (Angstroms) |           |           |
|------------------|------------------|----------------|-------------------------|-----------|-----------|
|                  |                  |                | X                       | Y         | Z         |
| 1                | 1                | 0              | -2.623987               | 0.015172  | -0.004144 |
| 2                | 6                | 0              | -0.395616               | 1.461572  | -0.000228 |
| 3                | 6                | 0              | -0.474172               | 0.121744  | -0.000676 |
| 4                | 8                | 0              | 0.588688                | -0.735541 | 0.000850  |
| 5                | 6                | 0              | 1.895702                | -0.170658 | -0.000279 |
| 6                | 1                | 0              | 2.591398                | -1.012773 | 0.000684  |

|    |   |   |           |           |           |
|----|---|---|-----------|-----------|-----------|
| 7  | 6 | 0 | -1.760054 | -0.654156 | -0.000165 |
| 8  | 1 | 0 | 2.065436  | 0.440539  | -0.895978 |
| 9  | 1 | 0 | -1.816843 | -1.307889 | -0.879710 |
| 10 | 1 | 0 | -1.308292 | 2.047480  | 0.000085  |
| 11 | 1 | 0 | 0.541602  | 2.006246  | 0.002556  |
| 12 | 1 | 0 | -1.819564 | -1.299835 | 0.885122  |
| 13 | 1 | 0 | 2.065580  | 0.444371  | 0.892667  |

---

### L1-Mg(II)

Zero-point correction= 0.95678 a.u.

Thermal correction to Gibbs Free Energy= 0.87909 a.u.

Sum of electronic and zero-point Energies= -2318.17175 a.u.

Sum of electronic and thermal Free Energies= -2318.24944 a.u.

The number of imaginary frequencies 0

Standard orientation

---

| Center<br>Number | Atomic<br>Number | Atomic<br>Type | Coordinates (Angstroms) |           |           |
|------------------|------------------|----------------|-------------------------|-----------|-----------|
|                  |                  |                | X                       | Y         | Z         |
| 1                | 8                | 0              | -1.900115               | -0.509639 | 0.950853  |
| 2                | 12               | 0              | 0.022098                | -0.019169 | 0.853086  |
| 3                | 8                | 0              | 0.437184                | -1.356066 | -0.558517 |
| 4                | 8                | 0              | -0.415886               | 1.380786  | -0.492449 |
| 5                | 8                | 0              | 1.933373                | 0.520435  | 0.952749  |
| 6                | 7                | 0              | -3.826850               | -0.623684 | -0.241241 |
| 7                | 1                | 0              | -4.266769               | -0.792143 | -1.140489 |
| 8                | 7                | 0              | -0.364821               | -1.209509 | -1.668741 |
| 9                | 7                | 0              | 3.833210                | 0.577120  | -0.284012 |
| 10               | 1                | 0              | 4.261757                | 0.737472  | -1.190249 |
| 11               | 7                | 0              | 0.363183                | 1.277403  | -1.623237 |
| 12               | 6                | 0              | -4.651260               | -0.164336 | 0.816461  |
| 13               | 6                | 0              | -5.219311               | 1.135867  | 0.750256  |
| 14               | 6                | 0              | -6.040889               | 1.576705  | 1.803882  |
| 15               | 1                | 0              | -6.484347               | 2.563520  | 1.784735  |
| 16               | 6                | 0              | -6.299957               | 0.757739  | 2.896797  |
| 17               | 1                | 0              | -6.930102               | 1.115734  | 3.700950  |
| 18               | 6                | 0              | -5.763405               | -0.523164 | 2.955960  |
| 19               | 1                | 0              | -5.999229               | -1.139741 | 3.813264  |
| 20               | 6                | 0              | -4.950394               | -1.014477 | 1.918147  |
| 21               | 6                | 0              | -4.447219               | -2.453506 | 1.988924  |
| 22               | 1                | 0              | -3.860021               | -2.708218 | 1.086191  |
| 23               | 6                | 0              | -3.517197               | -2.657385 | 3.190653  |
| 24               | 1                | 0              | -2.683038               | -1.925000 | 3.160254  |



|    |   |   |           |           |           |
|----|---|---|-----------|-----------|-----------|
| 25 | 1 | 0 | -3.078447 | -3.677859 | 3.164575  |
| 26 | 1 | 0 | -4.062434 | -2.535837 | 4.150357  |
| 27 | 6 | 0 | -5.612430 | -3.450055 | 2.023169  |
| 28 | 1 | 0 | -5.225936 | -4.490189 | 1.962331  |
| 29 | 1 | 0 | -6.283749 | -3.282682 | 1.153446  |
| 30 | 1 | 0 | -6.204483 | -3.354204 | 2.957781  |
| 31 | 6 | 0 | -4.949863 | 2.068270  | -0.426817 |
| 32 | 1 | 0 | -4.280502 | 1.585035  | -1.167321 |
| 33 | 6 | 0 | -6.245637 | 2.405692  | -1.173127 |
| 34 | 1 | 0 | -6.757077 | 1.471892  | -1.491161 |
| 35 | 1 | 0 | -6.017496 | 2.998467  | -2.084848 |
| 36 | 1 | 0 | -6.939249 | 2.995902  | -0.537474 |
| 37 | 6 | 0 | -4.234133 | 3.344022  | 0.030707  |
| 38 | 1 | 0 | -4.864821 | 3.939852  | 0.723194  |
| 39 | 1 | 0 | -3.994860 | 3.979929  | -0.847192 |
| 40 | 1 | 0 | -3.285317 | 3.083957  | 0.546218  |
| 41 | 6 | 0 | -2.498421 | -0.751796 | -0.120843 |
| 42 | 6 | 0 | -1.866389 | -1.415448 | -1.350480 |
| 43 | 1 | 0 | -2.396837 | -1.091860 | -2.250313 |
| 44 | 6 | 0 | -1.965303 | -2.940112 | -1.198869 |
| 45 | 1 | 0 | -3.010201 | -3.256755 | -1.206922 |
| 46 | 1 | 0 | -1.518923 | -3.241076 | -0.246248 |
| 47 | 6 | 0 | -1.175114 | -3.481680 | -2.396312 |
| 48 | 1 | 0 | -1.854068 | -3.591564 | -3.246162 |
| 49 | 6 | 0 | -0.377409 | -4.776509 | -2.130278 |
| 50 | 1 | 0 | -0.872893 | -5.421017 | -1.396608 |
| 51 | 1 | 0 | -0.289815 | -5.346689 | -3.062399 |
| 52 | 6 | 0 | 1.010610  | -4.293731 | -1.676848 |
| 53 | 1 | 0 | 1.781695  | -5.058431 | -1.810551 |
| 54 | 1 | 0 | 0.990440  | -4.012355 | -0.619045 |
| 55 | 6 | 0 | 1.262363  | -3.045275 | -2.543196 |
| 56 | 1 | 0 | 2.007273  | -2.361652 | -2.132924 |
| 57 | 1 | 0 | 1.594694  | -3.343319 | -3.544811 |
| 58 | 6 | 0 | -0.115757 | -2.397037 | -2.706107 |
| 59 | 1 | 0 | -0.265588 | -1.936363 | -3.682679 |
| 60 | 6 | 0 | -0.006593 | 0.049925  | -2.431882 |
| 61 | 1 | 0 | 0.848064  | -0.182030 | -3.063385 |
| 62 | 1 | 0 | -0.873020 | 0.311510  | -3.034141 |
| 63 | 6 | 0 | 0.087129  | 2.498001  | -2.606088 |
| 64 | 1 | 0 | 0.241204  | 2.082173  | -3.602173 |
| 65 | 6 | 0 | -1.302103 | 3.111017  | -2.408007 |
| 66 | 1 | 0 | -2.035273 | 2.392950  | -2.036162 |
| 67 | 1 | 0 | -1.640934 | 3.458838  | -3.391217 |
| 68 | 6 | 0 | -1.072254 | 4.310768  | -1.469831 |

|     |   |   |           |           |           |
|-----|---|---|-----------|-----------|-----------|
| 69  | 1 | 0 | -1.045566 | 3.966076  | -0.431443 |
| 70  | 1 | 0 | -1.857759 | 5.067500  | -1.556598 |
| 71  | 6 | 0 | 0.306434  | 4.846344  | -1.893327 |
| 72  | 1 | 0 | 0.793410  | 5.446763  | -1.117771 |
| 73  | 1 | 0 | 0.205760  | 5.479320  | -2.782706 |
| 74  | 6 | 0 | 1.127026  | 3.586939  | -2.253350 |
| 75  | 1 | 0 | 1.780988  | 3.763430  | -3.111450 |
| 76  | 6 | 0 | 1.961319  | 2.995426  | -1.108980 |
| 77  | 1 | 0 | 1.547470  | 3.252618  | -0.129398 |
| 78  | 1 | 0 | 3.001610  | 3.324527  | -1.144031 |
| 79  | 6 | 0 | 1.871229  | 1.476429  | -1.323483 |
| 80  | 1 | 0 | 2.388097  | 1.194227  | -2.244233 |
| 81  | 6 | 0 | 2.515070  | 0.759631  | -0.129759 |
| 82  | 6 | 0 | 4.667721  | 0.120836  | 0.767866  |
| 83  | 6 | 0 | 5.147263  | -1.216148 | 0.759051  |
| 84  | 6 | 0 | 5.961101  | -1.656859 | 1.819094  |
| 85  | 1 | 0 | 6.340796  | -2.669782 | 1.842160  |
| 86  | 6 | 0 | 6.295056  | -0.803939 | 2.864523  |
| 87  | 1 | 0 | 6.917236  | -1.162333 | 3.674728  |
| 88  | 6 | 0 | 5.846526  | 0.511496  | 2.866418  |
| 89  | 1 | 0 | 6.139326  | 1.152888  | 3.687233  |
| 90  | 6 | 0 | 5.046668  | 1.002863  | 1.818631  |
| 91  | 6 | 0 | 4.638304  | 2.472496  | 1.824631  |
| 92  | 1 | 0 | 4.056697  | 2.718130  | 0.917086  |
| 93  | 6 | 0 | 5.865123  | 3.392501  | 1.795977  |
| 94  | 1 | 0 | 5.545619  | 4.451182  | 1.688253  |
| 95  | 1 | 0 | 6.511737  | 3.140341  | 0.928233  |
| 96  | 1 | 0 | 6.463841  | 3.304300  | 2.726836  |
| 97  | 6 | 0 | 3.739253  | 2.794824  | 3.023891  |
| 98  | 1 | 0 | 2.855639  | 2.121969  | 3.033954  |
| 99  | 1 | 0 | 3.371719  | 3.841139  | 2.954680  |
| 100 | 1 | 0 | 4.286791  | 2.678747  | 3.982986  |
| 101 | 6 | 0 | 4.799653  | -2.184507 | -0.366324 |
| 102 | 1 | 0 | 4.148095  | -1.695131 | -1.118602 |
| 103 | 6 | 0 | 6.059069  | -2.634979 | -1.115546 |
| 104 | 1 | 0 | 6.616384  | -1.750761 | -1.492461 |
| 105 | 1 | 0 | 5.779668  | -3.261896 | -1.989536 |
| 106 | 1 | 0 | 6.730629  | -3.229483 | -0.460754 |
| 107 | 6 | 0 | 4.018766  | -3.391647 | 0.165243  |
| 108 | 1 | 0 | 4.618611  | -3.979661 | 0.890955  |
| 109 | 1 | 0 | 3.745297  | -4.064766 | -0.673108 |
| 110 | 1 | 0 | 3.085643  | -3.052193 | 0.663711  |

---

**L1-Mg(II)-COM**

Zero-point correction= 1.09142 a.u.

Thermal correction to Gibbs Free Energy= 0.99810 a.u.

Sum of electronic and zero-point Energies= -5444.21711 a.u.

Sum of electronic and thermal Free Energies= -5444.31043 a.u.

The number of imaginary frequencies 0

Standard orientation

| Center<br>Number | Atomic<br>Number | Atomic<br>Type | Coordinates (Angstroms) |           |           |
|------------------|------------------|----------------|-------------------------|-----------|-----------|
|                  |                  |                | X                       | Y         | Z         |
| 1                | 6                | 0              | 0.111709                | 1.835943  | -2.017466 |
| 2                | 6                | 0              | 0.630879                | 2.389171  | -0.682051 |
| 3                | 6                | 0              | 1.036598                | 3.744375  | -0.950375 |
| 4                | 6                | 0              | 0.795351                | 3.964010  | -2.332186 |
| 5                | 7                | 0              | 0.247264                | 2.799834  | -2.942576 |
| 6                | 8                | 0              | 0.626461                | 1.664122  | 0.310923  |
| 7                | 6                | 0              | 1.574771                | 4.768256  | -0.166681 |
| 8                | 6                | 0              | 1.078330                | 5.173049  | -2.933566 |
| 9                | 8                | 0              | -0.326590               | 0.683723  | -2.111876 |
| 10               | 6                | 0              | -0.093137               | 2.676945  | -4.355368 |
| 11               | 1                | 0              | 0.801947                | 2.823847  | -4.966241 |
| 12               | 1                | 0              | -0.487957               | 1.673970  | -4.520179 |
| 13               | 1                | 0              | -0.850872               | 3.418212  | -4.623650 |
| 14               | 6                | 0              | 1.869066                | 5.998302  | -0.754174 |
| 15               | 6                | 0              | 1.619960                | 6.182202  | -2.117408 |
| 16               | 35               | 0              | 1.896439                | 4.483825  | 1.675973  |
| 17               | 1                | 0              | 2.286944                | 6.805127  | -0.163191 |
| 18               | 1                | 0              | 1.853781                | 7.144399  | -2.563044 |
| 19               | 1                | 0              | 0.894046                | 5.348190  | -3.987239 |
| 20               | 8                | 0              | 1.686471                | -0.977034 | -0.660141 |
| 21               | 12               | 0              | -0.167736               | -0.323923 | -0.196514 |
| 22               | 8                | 0              | -0.962743               | -2.111883 | -0.732955 |
| 23               | 8                | 0              | 0.149465                | -1.070906 | 1.667728  |
| 24               | 8                | 0              | -2.043072               | 0.215750  | 0.319559  |
| 25               | 7                | 0              | 3.340263                | -2.494950 | -0.362631 |
| 26               | 1                | 0              | 3.594762                | -3.449940 | -0.136283 |
| 27               | 7                | 0              | -0.380022               | -3.207054 | -0.148770 |
| 28               | 7                | 0              | -4.083870               | -0.361247 | 1.113875  |
| 29               | 1                | 0              | -4.627578               | -0.978827 | 1.707001  |
| 30               | 7                | 0              | -0.788299               | -1.973175 | 2.097581  |
| 31               | 6                | 0              | 4.376802                | -1.528534 | -0.410397 |
| 32               | 6                | 0              | 5.068936                | -1.178336 | 0.779800  |
| 33               | 6                | 0              | 6.087466                | -0.209719 | 0.717876  |

|    |   |   |           |           |           |
|----|---|---|-----------|-----------|-----------|
| 34 | 1 | 0 | 6.632970  | 0.077678  | 1.607021  |
| 35 | 6 | 0 | 6.413959  | 0.406602  | -0.484224 |
| 36 | 1 | 0 | 7.195749  | 1.154945  | -0.511259 |
| 37 | 6 | 0 | 5.747196  | 0.060002  | -1.653396 |
| 38 | 1 | 0 | 6.034046  | 0.552174  | -2.573265 |
| 39 | 6 | 0 | 4.733316  | -0.915426 | -1.645174 |
| 40 | 6 | 0 | 4.066011  | -1.299826 | -2.962639 |
| 41 | 1 | 0 | 3.314194  | -2.096713 | -2.804209 |
| 42 | 6 | 0 | 3.322470  | -0.105712 | -3.575431 |
| 43 | 1 | 0 | 2.618018  | 0.331555  | -2.837395 |
| 44 | 1 | 0 | 2.733627  | -0.434218 | -4.458421 |
| 45 | 1 | 0 | 4.028152  | 0.687245  | -3.901716 |
| 46 | 6 | 0 | 5.084153  | -1.877308 | -3.953612 |
| 47 | 1 | 0 | 4.563317  | -2.249171 | -4.862130 |
| 48 | 1 | 0 | 5.622314  | -2.733283 | -3.492647 |
| 49 | 1 | 0 | 5.827364  | -1.114019 | -4.266914 |
| 50 | 6 | 0 | 4.725834  | -1.813601 | 2.123458  |
| 51 | 1 | 0 | 3.889888  | -2.534462 | 2.017573  |
| 52 | 6 | 0 | 5.914080  | -2.608467 | 2.677344  |
| 53 | 1 | 0 | 6.242020  | -3.370273 | 1.938103  |
| 54 | 1 | 0 | 5.618011  | -3.139394 | 3.607484  |
| 55 | 1 | 0 | 6.772736  | -1.944646 | 2.912565  |
| 56 | 6 | 0 | 4.256366  | -0.757399 | 3.130628  |
| 57 | 1 | 0 | 5.065131  | -0.037173 | 3.374473  |
| 58 | 1 | 0 | 3.940382  | -1.248753 | 4.074726  |
| 59 | 1 | 0 | 3.391095  | -0.195677 | 2.718344  |
| 60 | 6 | 0 | 2.042727  | -2.151901 | -0.468704 |
| 61 | 6 | 0 | 1.110980  | -3.364529 | -0.539377 |
| 62 | 1 | 0 | 1.499992  | -4.166860 | 0.093817  |
| 63 | 6 | 0 | 1.011942  | -3.844680 | -1.994864 |
| 64 | 1 | 0 | 1.975327  | -4.226266 | -2.339784 |
| 65 | 1 | 0 | 0.722518  | -3.005372 | -2.633798 |
| 66 | 6 | 0 | -0.075452 | -4.928086 | -1.953036 |
| 67 | 1 | 0 | 0.397395  | -5.895430 | -1.761573 |
| 68 | 6 | 0 | -1.008823 | -4.987223 | -3.183871 |
| 69 | 1 | 0 | -0.501740 | -4.664933 | -4.099601 |
| 70 | 1 | 0 | -1.339921 | -6.020801 | -3.339442 |
| 71 | 6 | 0 | -2.209792 | -4.099613 | -2.813092 |
| 72 | 1 | 0 | -3.104203 | -4.343645 | -3.394820 |
| 73 | 1 | 0 | -1.971721 | -3.045059 | -2.982073 |
| 74 | 6 | 0 | -2.399638 | -4.348839 | -1.304644 |
| 75 | 1 | 0 | -2.939070 | -3.550450 | -0.792326 |
| 76 | 1 | 0 | -2.943910 | -5.286727 | -1.139965 |
| 77 | 6 | 0 | -0.982674 | -4.545588 | -0.758575 |

|     |   |   |           |           |           |
|-----|---|---|-----------|-----------|-----------|
| 78  | 1 | 0 | -0.925647 | -5.269448 | 0.055145  |
| 79  | 6 | 0 | -0.693906 | -3.279677 | 1.334485  |
| 80  | 1 | 0 | -1.654142 | -3.780487 | 1.441090  |
| 81  | 1 | 0 | 0.093168  | -3.869238 | 1.800315  |
| 82  | 6 | 0 | -0.520673 | -2.383146 | 3.612387  |
| 83  | 1 | 0 | -0.870316 | -3.413710 | 3.684837  |
| 84  | 6 | 0 | 0.946259  | -2.207258 | 4.013757  |
| 85  | 1 | 0 | 1.627723  | -2.306676 | 3.167165  |
| 86  | 1 | 0 | 1.182082  | -2.999010 | 4.735066  |
| 87  | 6 | 0 | 1.004492  | -0.829247 | 4.699224  |
| 88  | 1 | 0 | 1.089547  | -0.046122 | 3.939960  |
| 89  | 1 | 0 | 1.854650  | -0.735039 | 5.382054  |
| 90  | 6 | 0 | -0.346522 | -0.726112 | 5.427906  |
| 91  | 1 | 0 | -0.636204 | 0.305362  | 5.655457  |
| 92  | 1 | 0 | -0.303614 | -1.271990 | 6.377795  |
| 93  | 6 | 0 | -1.357304 | -1.417564 | 4.485319  |
| 94  | 1 | 0 | -2.107936 | -1.982164 | 5.045098  |
| 95  | 6 | 0 | -2.071365 | -0.494824 | 3.488841  |
| 96  | 1 | 0 | -1.479172 | 0.397831  | 3.267186  |
| 97  | 1 | 0 | -3.056974 | -0.179107 | 3.837980  |
| 98  | 6 | 0 | -2.198941 | -1.347534 | 2.216836  |
| 99  | 1 | 0 | -2.878504 | -2.184830 | 2.395659  |
| 100 | 6 | 0 | -2.742032 | -0.470142 | 1.084311  |
| 101 | 6 | 0 | -4.789158 | 0.496770  | 0.232560  |
| 102 | 6 | 0 | -5.564247 | -0.059702 | -0.820319 |
| 103 | 6 | 0 | -6.256686 | 0.803927  | -1.688779 |
| 104 | 1 | 0 | -6.856543 | 0.410612  | -2.498868 |
| 105 | 6 | 0 | -6.183859 | 2.182980  | -1.531476 |
| 106 | 1 | 0 | -6.718354 | 2.832247  | -2.213279 |
| 107 | 6 | 0 | -5.436769 | 2.732075  | -0.496189 |
| 108 | 1 | 0 | -5.412812 | 3.809128  | -0.395720 |
| 109 | 6 | 0 | -4.742237 | 1.909441  | 0.409332  |
| 110 | 6 | 0 | -3.991502 | 2.557185  | 1.570114  |
| 111 | 1 | 0 | -3.526663 | 1.787312  | 2.215150  |
| 112 | 6 | 0 | -4.944717 | 3.342524  | 2.479424  |
| 113 | 1 | 0 | -4.399378 | 3.714724  | 3.373223  |
| 114 | 1 | 0 | -5.767989 | 2.683632  | 2.829812  |
| 115 | 1 | 0 | -5.384443 | 4.215655  | 1.952640  |
| 116 | 6 | 0 | -2.855231 | 3.455699  | 1.064579  |
| 117 | 1 | 0 | -2.193417 | 2.891478  | 0.375219  |
| 118 | 1 | 0 | -2.238741 | 3.809623  | 1.918571  |
| 119 | 1 | 0 | -3.249502 | 4.343775  | 0.526852  |
| 120 | 6 | 0 | -5.657605 | -1.567147 | -1.037550 |
| 121 | 1 | 0 | -5.032184 | -2.112055 | -0.301707 |

|     |   |   |           |           |           |
|-----|---|---|-----------|-----------|-----------|
| 122 | 6 | 0 | -7.094141 | -2.062743 | -0.836462 |
| 123 | 1 | 0 | -7.460847 | -1.771012 | 0.170893  |
| 124 | 1 | 0 | -7.129043 | -3.171110 | -0.906852 |
| 125 | 1 | 0 | -7.779939 | -1.641510 | -1.601853 |
| 126 | 6 | 0 | -5.130501 | -1.963412 | -2.421603 |
| 127 | 1 | 0 | -5.766592 | -1.553415 | -3.233727 |
| 128 | 1 | 0 | -5.119311 | -3.069501 | -2.520287 |
| 129 | 1 | 0 | -4.093954 | -1.588033 | -2.556908 |

## L2-Mg(II)

Zero-point correction= 0.98510 a.u.

Thermal correction to Gibbs Free Energy= 0.90689 a.u.

Sum of electronic and zero-point Energies= -2357.49701 a.u.

Sum of electronic and thermal Free Energies= -2357.57521a.u.

The number of imaginary frequencies 0

Standard orientation

| Center<br>Number | Atomic<br>Number | Atomic<br>Type | Coordinates (Angstroms) |           |           |
|------------------|------------------|----------------|-------------------------|-----------|-----------|
|                  |                  |                | X                       | Y         | Z         |
| 1                | 8                | 0              | 1.987785                | 0.171903  | 0.579556  |
| 2                | 12               | 0              | -0.008598               | 0.022201  | 0.390290  |
| 3                | 8                | 0              | 0.039605                | 1.613535  | -0.775678 |
| 4                | 8                | 0              | -0.026860               | -1.556087 | -0.780791 |
| 5                | 8                | 0              | -2.011332               | -0.139865 | 0.542392  |
| 6                | 7                | 0              | 4.101323                | 0.632968  | -0.088902 |
| 7                | 1                | 0              | 4.715071                | 1.115775  | -0.737096 |
| 8                | 7                | 0              | 0.921591                | 1.560258  | -1.839064 |
| 9                | 7                | 0              | -4.109337               | -0.628942 | -0.156037 |
| 10               | 1                | 0              | -4.704570               | -1.150984 | -0.791317 |
| 11               | 7                | 0              | -0.890408               | -1.506687 | -1.857655 |
| 12               | 6                | 0              | 4.698087                | -0.067419 | 0.985823  |
| 13               | 6                | 0              | 5.036595                | -1.437228 | 0.834747  |
| 14               | 6                | 0              | 5.601132                | -2.123100 | 1.925787  |
| 15               | 1                | 0              | 5.866270                | -3.168893 | 1.844664  |
| 16               | 6                | 0              | 5.827987                | -1.474318 | 3.135303  |
| 17               | 1                | 0              | 6.259859                | -2.018320 | 3.965672  |
| 18               | 6                | 0              | 5.506071                | -0.128946 | 3.281554  |
| 19               | 1                | 0              | 5.698072                | 0.346232  | 4.234483  |
| 20               | 6                | 0              | 4.947851                | 0.598391  | 2.214765  |
| 21               | 6                | 0              | 4.625127                | 2.077799  | 2.401971  |
| 22               | 1                | 0              | 4.231700                | 2.515066  | 1.461938  |
| 23               | 6                | 0              | 3.535254                | 2.274911  | 3.461462  |

|    |   |   |           |           |           |
|----|---|---|-----------|-----------|-----------|
| 24 | 1 | 0 | 2.627380  | 1.696395  | 3.186682  |
| 25 | 1 | 0 | 3.251156  | 3.347343  | 3.522640  |
| 26 | 1 | 0 | 3.880204  | 1.945802  | 4.464544  |
| 27 | 6 | 0 | 5.882985  | 2.882996  | 2.749586  |
| 28 | 1 | 0 | 5.646903  | 3.968555  | 2.771314  |
| 29 | 1 | 0 | 6.666897  | 2.717723  | 1.979573  |
| 30 | 1 | 0 | 6.289534  | 2.596177  | 3.742189  |
| 31 | 6 | 0 | 4.796627  | -2.178739 | -0.476736 |
| 32 | 1 | 0 | 4.353992  | -1.501236 | -1.236671 |
| 33 | 6 | 0 | 6.113836  | -2.689845 | -1.071853 |
| 34 | 1 | 0 | 6.827707  | -1.847534 | -1.196804 |
| 35 | 1 | 0 | 5.933045  | -3.137269 | -2.072691 |
| 36 | 1 | 0 | 6.579977  | -3.462385 | -0.424514 |
| 37 | 6 | 0 | 3.798383  | -3.326195 | -0.286539 |
| 38 | 1 | 0 | 4.199638  | -4.105713 | 0.394694  |
| 39 | 1 | 0 | 3.576107  | -3.802658 | -1.264809 |
| 40 | 1 | 0 | 2.848846  | -2.935973 | 0.137115  |
| 41 | 6 | 0 | 2.772469  | 0.748344  | -0.206588 |
| 42 | 6 | 0 | 2.358724  | 1.694030  | -1.340432 |
| 43 | 1 | 0 | 2.995363  | 1.493735  | -2.208415 |
| 44 | 6 | 0 | 2.453344  | 3.175352  | -0.959376 |
| 45 | 1 | 0 | 3.494393  | 3.481806  | -0.836647 |
| 46 | 1 | 0 | 1.924727  | 3.348373  | -0.017791 |
| 47 | 6 | 0 | 1.763827  | 3.884277  | -2.141191 |
| 48 | 1 | 0 | 2.519092  | 4.121111  | -2.895424 |
| 49 | 6 | 0 | 0.925162  | 5.128533  | -1.770471 |
| 50 | 1 | 0 | 1.322867  | 5.644161  | -0.889966 |
| 51 | 1 | 0 | 0.944243  | 5.841887  | -2.602801 |
| 52 | 6 | 0 | -0.504726 | 4.596881  | -1.567237 |
| 53 | 1 | 0 | -1.263362 | 5.378026  | -1.680269 |
| 54 | 1 | 0 | -0.611975 | 4.163295  | -0.568184 |
| 55 | 6 | 0 | -0.635503 | 3.492233  | -2.631337 |
| 56 | 1 | 0 | -1.433905 | 2.776308  | -2.428265 |
| 57 | 1 | 0 | -0.834816 | 3.942367  | -3.611439 |
| 58 | 6 | 0 | 0.754305  | 2.849706  | -2.718487 |
| 59 | 1 | 0 | 1.014286  | 2.535608  | -3.728342 |
| 60 | 6 | 0 | 0.737742  | 0.270388  | -2.664283 |
| 61 | 1 | 0 | 1.097085  | 0.475920  | -3.671073 |
| 62 | 1 | 0 | 1.378585  | -0.480734 | -2.208408 |
| 63 | 6 | 0 | -0.709541 | -0.210004 | -2.669190 |
| 64 | 1 | 0 | -1.066480 | -0.411154 | -3.678338 |
| 65 | 1 | 0 | -1.353658 | 0.537017  | -2.208982 |
| 66 | 6 | 0 | -0.685317 | -2.786316 | -2.740732 |
| 67 | 1 | 0 | -0.923421 | -2.466870 | -3.754074 |

|     |   |   |           |           |           |
|-----|---|---|-----------|-----------|-----------|
| 68  | 6 | 0 | 0.711291  | -3.411924 | -2.625152 |
| 69  | 1 | 0 | 1.497048  | -2.688694 | -2.402437 |
| 70  | 1 | 0 | 0.936232  | -3.855626 | -3.602849 |
| 71  | 6 | 0 | 0.572021  | -4.523255 | -1.569600 |
| 72  | 1 | 0 | 0.647208  | -4.092492 | -0.566483 |
| 73  | 1 | 0 | 1.345548  | -5.291698 | -1.666757 |
| 74  | 6 | 0 | -0.843906 | -5.074146 | -1.812284 |
| 75  | 1 | 0 | -1.255882 | -5.604069 | -0.946914 |
| 76  | 1 | 0 | -0.832530 | -5.778958 | -2.651945 |
| 77  | 6 | 0 | -1.691611 | -3.838816 | -2.191027 |
| 78  | 1 | 0 | -2.429272 | -4.080858 | -2.961028 |
| 79  | 6 | 0 | -2.413487 | -3.148603 | -1.017507 |
| 80  | 1 | 0 | -1.900603 | -3.318970 | -0.066698 |
| 81  | 1 | 0 | -3.450427 | -3.475857 | -0.918288 |
| 82  | 6 | 0 | -2.334466 | -1.663655 | -1.386907 |
| 83  | 1 | 0 | -2.956804 | -1.463689 | -2.265675 |
| 84  | 6 | 0 | -2.777091 | -0.728931 | -0.253231 |
| 85  | 6 | 0 | -4.730063 | 0.033609  | 0.929000  |
| 86  | 6 | 0 | -5.008413 | 1.422493  | 0.843638  |
| 87  | 6 | 0 | -5.591503 | 2.068992  | 1.948742  |
| 88  | 1 | 0 | -5.811387 | 3.127952  | 1.917343  |
| 89  | 6 | 0 | -5.896973 | 1.363062  | 3.107862  |
| 90  | 1 | 0 | -6.342358 | 1.877129  | 3.950002  |
| 91  | 6 | 0 | -5.636161 | -0.001011 | 3.188354  |
| 92  | 1 | 0 | -5.885300 | -0.520146 | 4.104351  |
| 93  | 6 | 0 | -5.060486 | -0.689561 | 2.105236  |
| 94  | 6 | 0 | -4.793930 | -2.186706 | 2.222870  |
| 95  | 1 | 0 | -4.389543 | -2.587791 | 1.271694  |
| 96  | 6 | 0 | -6.086495 | -2.965730 | 2.494646  |
| 97  | 1 | 0 | -5.888551 | -4.058302 | 2.453333  |
| 98  | 1 | 0 | -6.847118 | -2.726101 | 1.720884  |
| 99  | 1 | 0 | -6.504794 | -2.726935 | 3.495103  |
| 100 | 6 | 0 | -3.740651 | -2.474087 | 3.297894  |
| 101 | 1 | 0 | -2.806407 | -1.915375 | 3.073740  |
| 102 | 1 | 0 | -3.495871 | -3.557756 | 3.312743  |
| 103 | 1 | 0 | -4.100822 | -2.180735 | 4.306731  |
| 104 | 6 | 0 | -4.693954 | 2.223250  | -0.416108 |
| 105 | 1 | 0 | -4.262916 | 1.567592  | -1.201479 |
| 106 | 6 | 0 | -5.966359 | 2.831820  | -1.018262 |
| 107 | 1 | 0 | -6.722103 | 2.037301  | -1.198100 |
| 108 | 1 | 0 | -5.735028 | 3.311485  | -1.993465 |
| 109 | 1 | 0 | -6.406755 | 3.600371  | -0.348370 |
| 110 | 6 | 0 | -3.648843 | 3.307548  | -0.132144 |
| 111 | 1 | 0 | -4.027358 | 4.057389  | 0.594038  |



|     |   |   |           |          |           |
|-----|---|---|-----------|----------|-----------|
| 112 | 1 | 0 | -3.388525 | 3.837305 | -1.072548 |
| 113 | 1 | 0 | -2.725139 | 2.846617 | 0.278787  |

---

### L2-Mg(II)-COM

Zero-point correction= 1.11905 a.u.

Thermal correction to Gibbs Free Energy= 1.02563 a.u.

Sum of electronic and zero-point Energies= -5483.54358 a.u.

Sum of electronic and thermal Free Energies= -5483.63700 a.u.

The number of imaginary frequencies 0

Standard orientation

---

| Center<br>Number | Atomic<br>Number | Atomic<br>Type | Coordinates (Angstroms) |           |           |
|------------------|------------------|----------------|-------------------------|-----------|-----------|
|                  |                  |                | X                       | Y         | Z         |
| 1                | 6                | 0              | 0.134247                | 1.261741  | -2.028753 |
| 2                | 6                | 0              | 0.356749                | 2.069488  | -0.743004 |
| 3                | 6                | 0              | 0.642778                | 3.415566  | -1.171265 |
| 4                | 6                | 0              | 0.603083                | 3.396867  | -2.590375 |
| 5                | 7                | 0              | 0.298702                | 2.092583  | -3.072117 |
| 6                | 8                | 0              | 0.271542                | 1.500901  | 0.342676  |
| 7                | 6                | 0              | 0.927647                | 4.606741  | -0.499921 |
| 8                | 6                | 0              | 0.839014                | 4.532695  | -3.337061 |
| 9                | 8                | 0              | -0.128988               | 0.055381  | -1.993200 |
| 10               | 6                | 0              | 0.205368                | 1.722121  | -4.479694 |
| 11               | 1                | 0              | 1.154751                | 1.927988  | -4.981768 |
| 12               | 1                | 0              | -0.012891               | 0.655078  | -4.533052 |
| 13               | 1                | 0              | -0.597780               | 2.285216  | -4.962735 |
| 14               | 6                | 0              | 1.171300                | 5.766623  | -1.234648 |
| 15               | 6                | 0              | 1.124642                | 5.714731  | -2.630893 |
| 16               | 35               | 0              | 0.977650                | 4.642535  | 1.391324  |
| 17               | 1                | 0              | 1.395259                | 6.700115  | -0.731480 |
| 18               | 1                | 0              | 1.315652                | 6.624913  | -3.191269 |
| 19               | 1                | 0              | 0.807683                | 4.525212  | -4.420518 |
| 20               | 8                | 0              | 1.876853                | -0.982412 | 0.105830  |
| 21               | 12               | 0              | -0.153420               | -0.671604 | 0.065589  |
| 22               | 8                | 0              | -0.250964               | -2.583706 | -0.572121 |
| 23               | 8                | 0              | -0.328039               | -0.859983 | 2.068277  |
| 24               | 8                | 0              | -2.188494               | -0.420319 | 0.111267  |
| 25               | 7                | 0              | 3.885689                | -1.997742 | -0.104594 |
| 26               | 1                | 0              | 4.401760                | -2.845483 | -0.312635 |
| 27               | 7                | 0              | 0.465038                | -3.554215 | 0.090608  |
| 28               | 7                | 0              | -4.318968               | -0.331589 | 0.859326  |
| 29               | 1                | 0              | -4.968018               | -0.439940 | 1.630983  |

|    |   |   |           |           |           |
|----|---|---|-----------|-----------|-----------|
| 30 | 7 | 0 | -1.278860 | -1.707532 | 2.587061  |
| 31 | 6 | 0 | 4.588908  | -0.770148 | -0.131826 |
| 32 | 6 | 0 | 4.920336  | -0.118932 | 1.085187  |
| 33 | 6 | 0 | 5.563231  | 1.131448  | 1.034977  |
| 34 | 1 | 0 | 5.822465  | 1.657190  | 1.944344  |
| 35 | 6 | 0 | 5.876052  | 1.723448  | -0.184222 |
| 36 | 1 | 0 | 6.367452  | 2.687779  | -0.204407 |
| 37 | 6 | 0 | 5.557967  | 1.083591  | -1.377613 |
| 38 | 1 | 0 | 5.809666  | 1.574649  | -2.308351 |
| 39 | 6 | 0 | 4.916745  | -0.168308 | -1.375492 |
| 40 | 6 | 0 | 4.562910  | -0.832456 | -2.702742 |
| 41 | 1 | 0 | 4.090496  | -1.821303 | -2.532629 |
| 42 | 6 | 0 | 3.542899  | 0.005462  | -3.481763 |
| 43 | 1 | 0 | 2.643540  | 0.177378  | -2.855913 |
| 44 | 1 | 0 | 3.223469  | -0.533996 | -4.399097 |
| 45 | 1 | 0 | 3.964856  | 0.988445  | -3.780166 |
| 46 | 6 | 0 | 5.815970  | -1.098486 | -3.544912 |
| 47 | 1 | 0 | 5.547732  | -1.678248 | -4.454054 |
| 48 | 1 | 0 | 6.548713  | -1.695358 | -2.960609 |
| 49 | 1 | 0 | 6.299434  | -0.152172 | -3.866966 |
| 50 | 6 | 0 | 4.588539  | -0.739597 | 2.438983  |
| 51 | 1 | 0 | 4.107044  | -1.731498 | 2.309538  |
| 52 | 6 | 0 | 5.858554  | -0.986292 | 3.261871  |
| 53 | 1 | 0 | 6.575186  | -1.606059 | 2.681254  |
| 54 | 1 | 0 | 5.608771  | -1.535129 | 4.195118  |
| 55 | 1 | 0 | 6.354613  | -0.032940 | 3.541593  |
| 56 | 6 | 0 | 3.592056  | 0.130280  | 3.214074  |
| 57 | 1 | 0 | 4.027108  | 1.120524  | 3.465775  |
| 58 | 1 | 0 | 3.303607  | -0.373021 | 4.161178  |
| 59 | 1 | 0 | 2.673839  | 0.288205  | 2.609327  |
| 60 | 6 | 0 | 2.541127  | -2.021173 | -0.053989 |
| 61 | 6 | 0 | 1.954290  | -3.425958 | -0.227968 |
| 62 | 1 | 0 | 2.473024  | -4.107937 | 0.454962  |
| 63 | 6 | 0 | 2.047368  | -3.954706 | -1.663087 |
| 64 | 1 | 0 | 3.081039  | -4.188668 | -1.930205 |
| 65 | 1 | 0 | 1.670323  | -3.198492 | -2.357066 |
| 66 | 6 | 0 | 1.149380  | -5.206986 | -1.642010 |
| 67 | 1 | 0 | 1.766284  | -6.076487 | -1.398033 |
| 68 | 6 | 0 | 0.316453  | -5.449863 | -2.922463 |
| 69 | 1 | 0 | 0.813558  | -5.057946 | -3.816418 |
| 70 | 1 | 0 | 0.181774  | -6.527921 | -3.070859 |
| 71 | 6 | 0 | -1.044006 | -4.784943 | -2.644835 |
| 72 | 1 | 0 | -1.846165 | -5.193115 | -3.268645 |
| 73 | 1 | 0 | -0.987817 | -3.707414 | -2.826499 |

|     |   |   |           |           |           |
|-----|---|---|-----------|-----------|-----------|
| 74  | 6 | 0 | -1.273888 | -5.046053 | -1.146025 |
| 75  | 1 | 0 | -2.003928 | -4.374961 | -0.691017 |
| 76  | 1 | 0 | -1.628433 | -6.073739 | -0.998141 |
| 77  | 6 | 0 | 0.116860  | -4.963039 | -0.503364 |
| 78  | 1 | 0 | 0.242544  | -5.659623 | 0.324937  |
| 79  | 6 | 0 | 0.222375  | -3.496575 | 1.607728  |
| 80  | 1 | 0 | 0.483115  | -4.470523 | 2.019547  |
| 81  | 1 | 0 | 0.909181  | -2.748125 | 1.994966  |
| 82  | 6 | 0 | -1.212118 | -3.098675 | 1.935902  |
| 83  | 1 | 0 | -1.688737 | -3.801414 | 2.618595  |
| 84  | 1 | 0 | -1.796140 | -3.035428 | 1.020178  |
| 85  | 6 | 0 | -1.121228 | -1.787737 | 4.144729  |
| 86  | 1 | 0 | -1.464642 | -2.786432 | 4.411694  |
| 87  | 6 | 0 | 0.297474  | -1.491534 | 4.649421  |
| 88  | 1 | 0 | 1.080105  | -1.770427 | 3.943157  |
| 89  | 1 | 0 | 0.439320  | -2.091575 | 5.557192  |
| 90  | 6 | 0 | 0.295363  | 0.004418  | 5.009078  |
| 91  | 1 | 0 | 0.451045  | 0.599246  | 4.104076  |
| 92  | 1 | 0 | 1.081045  | 0.264049  | 5.726237  |
| 93  | 6 | 0 | -1.118675 | 0.236615  | 5.570247  |
| 94  | 1 | 0 | -1.430924 | 1.285924  | 5.535207  |
| 95  | 1 | 0 | -1.162126 | -0.082425 | 6.618511  |
| 96  | 6 | 0 | -2.038455 | -0.668393 | 4.718620  |
| 97  | 1 | 0 | -2.831168 | -1.115174 | 5.325232  |
| 98  | 6 | 0 | -2.677046 | 0.010260  | 3.491933  |
| 99  | 1 | 0 | -2.077266 | 0.854325  | 3.140940  |
| 100 | 1 | 0 | -3.691422 | 0.362330  | 3.692062  |
| 101 | 6 | 0 | -2.671477 | -1.097159 | 2.433907  |
| 102 | 1 | 0 | -3.384249 | -1.882653 | 2.710574  |
| 103 | 6 | 0 | -3.011410 | -0.598293 | 1.026812  |
| 104 | 6 | 0 | -4.784921 | 0.303256  | -0.315976 |
| 105 | 6 | 0 | -5.135952 | -0.476885 | -1.448539 |
| 106 | 6 | 0 | -5.533839 | 0.177142  | -2.628710 |
| 107 | 1 | 0 | -5.801964 | -0.388672 | -3.511108 |
| 108 | 6 | 0 | -5.584407 | 1.565890  | -2.691477 |
| 109 | 1 | 0 | -5.887803 | 2.052948  | -3.609277 |
| 110 | 6 | 0 | -5.242571 | 2.331882  | -1.581796 |
| 111 | 1 | 0 | -5.284069 | 3.409658  | -1.667132 |
| 112 | 6 | 0 | -4.843669 | 1.720579  | -0.379407 |
| 113 | 6 | 0 | -4.457295 | 2.589692  | 0.813314  |
| 114 | 1 | 0 | -4.213664 | 1.960986  | 1.693376  |
| 115 | 6 | 0 | -5.617757 | 3.493654  | 1.245907  |
| 116 | 1 | 0 | -5.356869 | 4.024139  | 2.186787  |
| 117 | 1 | 0 | -6.526545 | 2.883381  | 1.436975  |

|     |   |   |           |           |           |
|-----|---|---|-----------|-----------|-----------|
| 118 | 1 | 0 | -5.852386 | 4.254829  | 0.472480  |
| 119 | 6 | 0 | -3.201545 | 3.413689  | 0.507917  |
| 120 | 1 | 0 | -2.369270 | 2.740732  | 0.213067  |
| 121 | 1 | 0 | -2.882682 | 3.975459  | 1.411993  |
| 122 | 1 | 0 | -3.382165 | 4.140251  | -0.312495 |
| 123 | 6 | 0 | -5.078734 | -2.001191 | -1.415927 |
| 124 | 1 | 0 | -4.775567 | -2.361204 | -0.410578 |
| 125 | 6 | 0 | -6.456763 | -2.614926 | -1.691509 |
| 126 | 1 | 0 | -7.205309 | -2.209226 | -0.977587 |
| 127 | 1 | 0 | -6.417415 | -3.717193 | -1.556471 |
| 128 | 1 | 0 | -6.797493 | -2.403830 | -2.727101 |
| 129 | 6 | 0 | -4.032452 | -2.533695 | -2.401903 |
| 130 | 1 | 0 | -4.303916 | -2.292750 | -3.451419 |
| 131 | 1 | 0 | -3.949843 | -3.637304 | -2.308502 |
| 132 | 1 | 0 | -3.038862 | -2.089301 | -2.179485 |

---

### L3a-Mg(II)

Zero-point correction= 1.01549 a.u.

Thermal correction to Gibbs Free Energy= 0.933070 a.u.

Sum of electronic and zero-point Energies= -2396.81288 a.u.

Sum of electronic and thermal Free Energies= -2396.89530 a.u.

The number of imaginary frequencies        0

Standard orientation

---

| Center<br>Number | Atomic<br>Number | Atomic<br>Type | Coordinates (Angstroms) |           |           |
|------------------|------------------|----------------|-------------------------|-----------|-----------|
|                  |                  |                | X                       | Y         | Z         |
| 1                | 8                | 0              | -1.987904               | -0.130409 | 0.393452  |
| 2                | 12               | 0              | -0.015931               | 0.031528  | 0.102670  |
| 3                | 8                | 0              | -0.076588               | -1.530719 | -1.077507 |
| 4                | 8                | 0              | 0.080597                | 1.621797  | -1.029215 |
| 5                | 8                | 0              | 1.929740                | 0.233299  | 0.551038  |
| 6                | 7                | 0              | -4.108229               | -0.859162 | 0.097081  |
| 7                | 1                | 0              | -4.750824               | -1.479282 | -0.385682 |
| 8                | 7                | 0              | -1.110668               | -1.616699 | -1.998290 |
| 9                | 7                | 0              | 4.079303                | 0.864066  | 0.217021  |
| 10               | 1                | 0              | 4.743323                | 1.424299  | -0.307256 |
| 11               | 7                | 0              | 1.148276                | 1.746118  | -1.902905 |
| 12               | 6                | 0              | -4.620837               | -0.070137 | 1.153423  |
| 13               | 6                | 0              | -4.960874               | 1.287958  | 0.920147  |
| 14               | 6                | 0              | -5.415078               | 2.070234  | 1.997345  |
| 15               | 1                | 0              | -5.669195               | 3.112332  | 1.855318  |
| 16               | 6                | 0              | -5.544150               | 1.523559  | 3.270224  |

|    |   |   |           |           |           |
|----|---|---|-----------|-----------|-----------|
| 17 | 1 | 0 | -5.894325 | 2.139796  | 4.088318  |
| 18 | 6 | 0 | -5.221616 | 0.189190  | 3.497537  |
| 19 | 1 | 0 | -5.327197 | -0.203101 | 4.500335  |
| 20 | 6 | 0 | -4.758956 | -0.628660 | 2.450677  |
| 21 | 6 | 0 | -4.390444 | -2.081376 | 2.736632  |
| 22 | 1 | 0 | -4.073500 | -2.595313 | 1.805746  |
| 23 | 6 | 0 | -3.204224 | -2.165688 | 3.703856  |
| 24 | 1 | 0 | -2.340152 | -1.596760 | 3.298513  |
| 25 | 1 | 0 | -2.888707 | -3.223391 | 3.831221  |
| 26 | 1 | 0 | -3.465581 | -1.755726 | 4.702474  |
| 27 | 6 | 0 | -5.593010 | -2.868278 | 3.271380  |
| 28 | 1 | 0 | -5.331804 | -3.944123 | 3.367082  |
| 29 | 1 | 0 | -6.448546 | -2.785189 | 2.567510  |
| 30 | 1 | 0 | -5.911728 | -2.498223 | 4.268672  |
| 31 | 6 | 0 | -4.830965 | 1.915316  | -0.464657 |
| 32 | 1 | 0 | -4.511525 | 1.157391  | -1.209916 |
| 33 | 6 | 0 | -6.176333 | 2.457548  | -0.962240 |
| 34 | 1 | 0 | -6.944267 | 1.654822  | -0.937194 |
| 35 | 1 | 0 | -6.080977 | 2.808456  | -2.012217 |
| 36 | 1 | 0 | -6.527546 | 3.309721  | -0.343017 |
| 37 | 6 | 0 | -3.759312 | 3.010639  | -0.471347 |
| 38 | 1 | 0 | -4.049428 | 3.865539  | 0.175591  |
| 39 | 1 | 0 | -3.606931 | 3.388079  | -1.505101 |
| 40 | 1 | 0 | -2.794510 | 2.598748  | -0.106464 |
| 41 | 6 | 0 | -2.804256 | -0.873446 | -0.199218 |
| 42 | 6 | 0 | -2.438566 | -1.880161 | -1.289766 |
| 43 | 1 | 0 | -3.203458 | -1.824960 | -2.071803 |
| 44 | 6 | 0 | -2.296927 | -3.331933 | -0.826122 |
| 45 | 1 | 0 | -3.259088 | -3.747175 | -0.518563 |
| 46 | 1 | 0 | -1.606016 | -3.387192 | 0.019867  |
| 47 | 6 | 0 | -1.730207 | -4.022283 | -2.084843 |
| 48 | 1 | 0 | -2.567697 | -4.362724 | -2.700289 |
| 49 | 6 | 0 | -0.720372 | -5.161204 | -1.822063 |
| 50 | 1 | 0 | -0.931719 | -5.690908 | -0.887106 |
| 51 | 1 | 0 | -0.780337 | -5.895253 | -2.634307 |
| 52 | 6 | 0 | 0.656801  | -4.475788 | -1.833800 |
| 53 | 1 | 0 | 1.476167  | -5.175694 | -2.027235 |
| 54 | 1 | 0 | 0.844553  | -3.992565 | -0.870161 |
| 55 | 6 | 0 | 0.520441  | -3.408635 | -2.934346 |
| 56 | 1 | 0 | 1.247988  | -2.599552 | -2.857008 |
| 57 | 1 | 0 | 0.638599  | -3.873131 | -3.921053 |
| 58 | 6 | 0 | -0.931906 | -2.918320 | -2.845219 |
| 59 | 1 | 0 | -1.361964 | -2.680382 | -3.818244 |
| 60 | 6 | 0 | -1.223091 | -0.359167 | -2.849705 |

|     |   |   |           |           |           |
|-----|---|---|-----------|-----------|-----------|
| 61  | 1 | 0 | -2.000857 | -0.574525 | -3.586956 |
| 62  | 1 | 0 | -1.580674 | 0.426098  | -2.187171 |
| 63  | 6 | 0 | 0.041505  | 0.096961  | -3.583880 |
| 64  | 1 | 0 | -0.284684 | 0.915798  | -4.234944 |
| 65  | 1 | 0 | 0.384021  | -0.696690 | -4.257561 |
| 66  | 6 | 0 | 1.289024  | 0.526622  | -2.805908 |
| 67  | 1 | 0 | 1.639113  | -0.287556 | -2.173753 |
| 68  | 1 | 0 | 2.079310  | 0.777524  | -3.517848 |
| 69  | 6 | 0 | 1.000064  | 3.082989  | -2.700347 |
| 70  | 1 | 0 | 1.468817  | 2.882780  | -3.663922 |
| 71  | 6 | 0 | -0.447819 | 3.578407  | -2.827864 |
| 72  | 1 | 0 | -1.179795 | 2.769734  | -2.811920 |
| 73  | 1 | 0 | -0.525815 | 4.082621  | -3.798909 |
| 74  | 6 | 0 | -0.629506 | 4.600532  | -1.691600 |
| 75  | 1 | 0 | -0.860274 | 4.078678  | -0.758197 |
| 76  | 1 | 0 | -1.439295 | 5.309597  | -1.891815 |
| 77  | 6 | 0 | 0.746340  | 5.281855  | -1.593067 |
| 78  | 1 | 0 | 0.918992  | 5.768790  | -0.627329 |
| 79  | 1 | 0 | 0.839976  | 6.050876  | -2.369004 |
| 80  | 6 | 0 | 1.766341  | 4.153518  | -1.864211 |
| 81  | 1 | 0 | 2.626854  | 4.519670  | -2.431133 |
| 82  | 6 | 0 | 2.283615  | 3.411096  | -0.614064 |
| 83  | 1 | 0 | 1.560356  | 3.434129  | 0.205621  |
| 84  | 1 | 0 | 3.234173  | 3.809963  | -0.253347 |
| 85  | 6 | 0 | 2.445217  | 1.979079  | -1.128976 |
| 86  | 1 | 0 | 3.243020  | 1.952489  | -1.877871 |
| 87  | 6 | 0 | 2.772211  | 0.936569  | -0.056018 |
| 88  | 6 | 0 | 4.590763  | -0.017389 | 1.197286  |
| 89  | 6 | 0 | 4.958616  | -1.338919 | 0.833956  |
| 90  | 6 | 0 | 5.415944  | -2.216685 | 1.833608  |
| 91  | 1 | 0 | 5.687720  | -3.235862 | 1.592530  |
| 92  | 6 | 0 | 5.524867  | -1.795866 | 3.155401  |
| 93  | 1 | 0 | 5.879638  | -2.483791 | 3.912178  |
| 94  | 6 | 0 | 5.178964  | -0.495332 | 3.509505  |
| 95  | 1 | 0 | 5.273435  | -0.200655 | 4.546308  |
| 96  | 6 | 0 | 4.710250  | 0.413701  | 2.543624  |
| 97  | 6 | 0 | 4.330582  | 1.830578  | 2.963042  |
| 98  | 1 | 0 | 4.006226  | 2.425961  | 2.084298  |
| 99  | 6 | 0 | 5.529998  | 2.574020  | 3.562758  |
| 100 | 1 | 0 | 5.261855  | 3.634302  | 3.759913  |
| 101 | 1 | 0 | 6.381820  | 2.563241  | 2.849359  |
| 102 | 1 | 0 | 5.857694  | 2.114430  | 4.519022  |
| 103 | 6 | 0 | 3.148197  | 1.816298  | 3.938291  |
| 104 | 1 | 0 | 2.291023  | 1.269473  | 3.489954  |

|     |   |   |          |           |           |
|-----|---|---|----------|-----------|-----------|
| 105 | 1 | 0 | 2.817260 | 2.854900  | 4.153867  |
| 106 | 1 | 0 | 3.420337 | 1.329009  | 4.898537  |
| 107 | 6 | 0 | 4.846835 | -1.828875 | -0.606735 |
| 108 | 1 | 0 | 4.527946 | -1.004608 | -1.278210 |
| 109 | 6 | 0 | 6.200244 | -2.311742 | -1.141721 |
| 110 | 1 | 0 | 6.964763 | -1.514208 | -1.022789 |
| 111 | 1 | 0 | 6.118836 | -2.549460 | -2.224167 |
| 112 | 1 | 0 | 6.547109 | -3.223557 | -0.611776 |
| 113 | 6 | 0 | 3.783458 | -2.924634 | -0.729337 |
| 114 | 1 | 0 | 4.068580 | -3.832048 | -0.155940 |
| 115 | 1 | 0 | 3.650134 | -3.209002 | -1.794798 |
| 116 | 1 | 0 | 2.811423 | -2.549885 | -0.344612 |

---

### L3a-Mg(II)-COM

Zero-point correction= 1.15012 a.u.

Thermal correction to Gibbs Free Energy= 1.05414 a.u.

Sum of electronic and zero-point Energies= -5522.85792 a.u.

Sum of electronic and thermal Free Energies= -5522.95390 a.u.

The number of imaginary frequencies        0

Standard orientation

---

| Center<br>Number | Atomic<br>Number | Atomic<br>Type | Coordinates (Angstroms) |           |           |
|------------------|------------------|----------------|-------------------------|-----------|-----------|
|                  |                  |                | X                       | Y         | Z         |
| 1                | 6                | 0              | -0.665947               | 1.065427  | -1.868509 |
| 2                | 6                | 0              | -0.586907               | 1.864244  | -0.559525 |
| 3                | 6                | 0              | -1.109024               | 3.173403  | -0.868993 |
| 4                | 6                | 0              | -1.509323               | 3.129268  | -2.230553 |
| 5                | 7                | 0              | -1.229137               | 1.857245  | -2.800154 |
| 6                | 8                | 0              | -0.161569               | 1.318026  | 0.454513  |
| 7                | 6                | 0              | -1.302447               | 4.340655  | -0.126521 |
| 8                | 6                | 0              | -2.096584               | 4.214716  | -2.849371 |
| 9                | 8                | 0              | -0.251512               | -0.093230 | -1.946017 |
| 10               | 6                | 0              | -1.499699               | 1.482044  | -4.182386 |
| 11               | 1                | 0              | -0.915668               | 2.107487  | -4.863614 |
| 12               | 1                | 0              | -1.214672               | 0.437174  | -4.309088 |
| 13               | 1                | 0              | -2.565525               | 1.598030  | -4.397591 |
| 14               | 6                | 0              | -1.892062               | 5.449750  | -0.732074 |
| 15               | 6                | 0              | -2.279002               | 5.372251  | -2.073157 |
| 16               | 35               | 0              | -0.764400               | 4.416295  | 1.687176  |
| 17               | 1                | 0              | -2.048726               | 6.363878  | -0.171502 |
| 18               | 1                | 0              | -2.738282               | 6.242616  | -2.531928 |
| 19               | 1                | 0              | -2.404846               | 4.186134  | -3.888165 |

|    |    |   |           |           |           |
|----|----|---|-----------|-----------|-----------|
| 20 | 8  | 0 | 2.219219  | -0.256232 | -0.032225 |
| 21 | 12 | 0 | 0.268328  | -0.861306 | 0.066405  |
| 22 | 8  | 0 | 0.900203  | -2.580603 | -0.758027 |
| 23 | 8  | 0 | 0.239908  | -1.341133 | 2.025537  |
| 24 | 8  | 0 | -1.755347 | -1.198726 | 0.156110  |
| 25 | 7  | 0 | 4.389539  | -0.182617 | -0.663124 |
| 26 | 1  | 0 | 5.179713  | -0.653802 | -1.089968 |
| 27 | 7  | 0 | 2.112962  | -3.147538 | -0.419679 |
| 28 | 7  | 0 | -3.843409 | -1.582368 | 0.929364  |
| 29 | 1  | 0 | -4.433632 | -1.833313 | 1.715452  |
| 30 | 7  | 0 | -0.534164 | -2.375913 | 2.515239  |
| 31 | 6  | 0 | 4.507442  | 1.201268  | -0.392990 |
| 32 | 6  | 0 | 4.725471  | 1.646525  | 0.937858  |
| 33 | 6  | 0 | 4.793905  | 3.028602  | 1.190379  |
| 34 | 1  | 0 | 4.946256  | 3.400314  | 2.195066  |
| 35 | 6  | 0 | 4.667480  | 3.949300  | 0.155170  |
| 36 | 1  | 0 | 4.725267  | 5.009255  | 0.367016  |
| 37 | 6  | 0 | 4.463514  | 3.514336  | -1.150372 |
| 38 | 1  | 0 | 4.364740  | 4.256640  | -1.931323 |
| 39 | 6  | 0 | 4.374704  | 2.142260  | -1.447491 |
| 40 | 6  | 0 | 4.112931  | 1.700682  | -2.884132 |
| 41 | 1  | 0 | 4.050792  | 0.594790  | -2.949144 |
| 42 | 6  | 0 | 2.769005  | 2.238172  | -3.391858 |
| 43 | 1  | 0 | 1.955769  | 1.951643  | -2.693427 |
| 44 | 1  | 0 | 2.534290  | 1.804632  | -4.387592 |
| 45 | 1  | 0 | 2.781810  | 3.344514  | -3.487084 |
| 46 | 6  | 0 | 5.258451  | 2.124166  | -3.810352 |
| 47 | 1  | 0 | 5.096569  | 1.712581  | -4.829655 |
| 48 | 1  | 0 | 6.223763  | 1.727152  | -3.429467 |
| 49 | 1  | 0 | 5.331554  | 3.229581  | -3.887502 |
| 50 | 6  | 0 | 4.877671  | 0.662835  | 2.094686  |
| 51 | 1  | 0 | 4.849556  | -0.383771 | 1.726455  |
| 52 | 6  | 0 | 6.232406  | 0.828319  | 2.794037  |
| 53 | 1  | 0 | 7.057264  | 0.738693  | 2.054735  |
| 54 | 1  | 0 | 6.367679  | 0.031636  | 3.556643  |
| 55 | 1  | 0 | 6.311961  | 1.812000  | 3.303033  |
| 56 | 6  | 0 | 3.722524  | 0.805537  | 3.091983  |
| 57 | 1  | 0 | 3.741964  | 1.795257  | 3.595478  |
| 58 | 1  | 0 | 3.790335  | 0.014669  | 3.869253  |
| 59 | 1  | 0 | 2.750745  | 0.693620  | 2.566268  |
| 60 | 6  | 0 | 3.222244  | -0.827135 | -0.499119 |
| 61 | 6  | 0 | 3.269468  | -2.290166 | -0.933598 |
| 62 | 1  | 0 | 4.182059  | -2.734440 | -0.520951 |
| 63 | 6  | 0 | 3.225023  | -2.526697 | -2.444075 |



|     |   |   |           |           |           |
|-----|---|---|-----------|-----------|-----------|
| 64  | 1 | 0 | 4.140777  | -2.179106 | -2.928034 |
| 65  | 1 | 0 | 2.375373  | -1.991706 | -2.876517 |
| 66  | 6 | 0 | 3.047115  | -4.055764 | -2.537931 |
| 67  | 1 | 0 | 4.036363  | -4.521378 | -2.569143 |
| 68  | 6 | 0 | 2.154984  | -4.550031 | -3.698681 |
| 69  | 1 | 0 | 2.208708  | -3.886895 | -4.568973 |
| 70  | 1 | 0 | 2.493001  | -5.541586 | -4.022570 |
| 71  | 6 | 0 | 0.742333  | -4.647635 | -3.096881 |
| 72  | 1 | 0 | 0.089273  | -5.321460 | -3.661244 |
| 73  | 1 | 0 | 0.271527  | -3.660101 | -3.071081 |
| 74  | 6 | 0 | 0.993315  | -5.136778 | -1.659551 |
| 75  | 1 | 0 | 0.165567  | -4.931408 | -0.979427 |
| 76  | 1 | 0 | 1.169616  | -6.219765 | -1.658579 |
| 77  | 6 | 0 | 2.308311  | -4.470745 | -1.227986 |
| 78  | 1 | 0 | 2.917076  | -5.107669 | -0.585173 |
| 79  | 6 | 0 | 2.250248  | -3.350121 | 1.079455  |
| 80  | 1 | 0 | 3.213454  | -3.845756 | 1.226787  |
| 81  | 1 | 0 | 2.290452  | -2.354969 | 1.516005  |
| 82  | 6 | 0 | 1.156523  | -4.183704 | 1.750180  |
| 83  | 1 | 0 | 1.504821  | -4.355599 | 2.775197  |
| 84  | 1 | 0 | 1.111403  | -5.176844 | 1.288525  |
| 85  | 6 | 0 | -0.287453 | -3.677428 | 1.770042  |
| 86  | 1 | 0 | -0.648433 | -3.518471 | 0.756202  |
| 87  | 1 | 0 | -0.917414 | -4.425728 | 2.259453  |
| 88  | 6 | 0 | -0.301242 | -2.514289 | 4.054086  |
| 89  | 1 | 0 | -0.448175 | -3.573622 | 4.265090  |
| 90  | 6 | 0 | 1.060721  | -1.992686 | 4.535182  |
| 91  | 1 | 0 | 1.843524  | -2.070305 | 3.779858  |
| 92  | 1 | 0 | 1.354378  | -2.616837 | 5.388804  |
| 93  | 6 | 0 | 0.800873  | -0.551282 | 5.006699  |
| 94  | 1 | 0 | 0.806850  | 0.122774  | 4.144994  |
| 95  | 1 | 0 | 1.555387  | -0.200179 | 5.718413  |
| 96  | 6 | 0 | -0.607886 | -0.620697 | 5.621622  |
| 97  | 1 | 0 | -1.103511 | 0.354644  | 5.677023  |
| 98  | 1 | 0 | -0.551711 | -1.017966 | 6.642164  |
| 99  | 6 | 0 | -1.382457 | -1.612757 | 4.725114  |
| 100 | 1 | 0 | -2.067030 | -2.231351 | 5.312660  |
| 101 | 6 | 0 | -2.171208 | -0.977822 | 3.562879  |
| 102 | 1 | 0 | -1.733239 | -0.028505 | 3.243231  |
| 103 | 1 | 0 | -3.220914 | -0.812811 | 3.815630  |
| 104 | 6 | 0 | -2.022073 | -2.019313 | 2.451138  |
| 105 | 1 | 0 | -2.569028 | -2.927216 | 2.727241  |
| 106 | 6 | 0 | -2.505130 | -1.566898 | 1.077805  |
| 107 | 6 | 0 | -4.447186 | -0.955466 | -0.188162 |

|     |   |   |           |           |           |
|-----|---|---|-----------|-----------|-----------|
| 108 | 6 | 0 | -4.464653 | -1.613883 | -1.447497 |
| 109 | 6 | 0 | -4.954630 | -0.923061 | -2.570441 |
| 110 | 1 | 0 | -4.973224 | -1.393757 | -3.544521 |
| 111 | 6 | 0 | -5.421820 | 0.381870  | -2.456349 |
| 112 | 1 | 0 | -5.787626 | 0.901576  | -3.332624 |
| 113 | 6 | 0 | -5.427217 | 1.020288  | -1.220763 |
| 114 | 1 | 0 | -5.797880 | 2.035317  | -1.167888 |
| 115 | 6 | 0 | -4.954356 | 0.366131  | -0.068480 |
| 116 | 6 | 0 | -4.971695 | 1.100408  | 1.269427  |
| 117 | 1 | 0 | -4.616331 | 0.440437  | 2.085827  |
| 118 | 6 | 0 | -6.393411 | 1.526004  | 1.656268  |
| 119 | 1 | 0 | -6.397226 | 1.953306  | 2.682005  |
| 120 | 1 | 0 | -7.071138 | 0.645603  | 1.650242  |
| 121 | 1 | 0 | -6.793984 | 2.292901  | 0.960431  |
| 122 | 6 | 0 | -4.024656 | 2.303340  | 1.248861  |
| 123 | 1 | 0 | -2.994030 | 1.959298  | 1.026372  |
| 124 | 1 | 0 | -4.011108 | 2.797568  | 2.243727  |
| 125 | 1 | 0 | -4.332178 | 3.051320  | 0.487897  |
| 126 | 6 | 0 | -3.979793 | -3.052346 | -1.604442 |
| 127 | 1 | 0 | -3.645686 | -3.461339 | -0.628144 |
| 128 | 6 | 0 | -5.112924 | -3.968304 | -2.082285 |
| 129 | 1 | 0 | -5.982601 | -3.890655 | -1.394864 |
| 130 | 1 | 0 | -4.771943 | -5.025918 | -2.086602 |
| 131 | 1 | 0 | -5.443412 | -3.705200 | -3.109463 |
| 132 | 6 | 0 | -2.775514 | -3.134624 | -2.550414 |
| 133 | 1 | 0 | -3.052374 | -2.847694 | -3.586699 |
| 134 | 1 | 0 | -2.378790 | -4.172073 | -2.569540 |
| 135 | 1 | 0 | -1.965168 | -2.461990 | -2.200365 |

---

### L3a-TS1-si

Zero-point correction= 1.26550 a.u.

Thermal correction to Gibbs Free Energy= 1.16610 a.u.

Sum of electronic and zero-point Energies= -5755.26539 a.u.

Sum of electronic and thermal Free Energies= -5755.36479 a.u.

The number of imaginary frequencies 1

Standard orientation

---

| Center<br>Number | Atomic<br>Number | Atomic<br>Type | Coordinates (Angstroms) |           |           |
|------------------|------------------|----------------|-------------------------|-----------|-----------|
|                  |                  |                | X                       | Y         | Z         |
| 1                | 6                | 0              | 0.705600                | -0.504800 | -1.756800 |
| 2                | 6                | 0              | 0.613000                | -1.471800 | -0.554200 |
| 3                | 6                | 0              | 1.700800                | -2.473300 | -0.889900 |

|    |    |   |           |           |           |
|----|----|---|-----------|-----------|-----------|
| 4  | 6  | 0 | 2.173300  | -2.174500 | -2.185400 |
| 5  | 7  | 0 | 1.537700  | -1.011300 | -2.689800 |
| 6  | 8  | 0 | 0.447900  | -0.872100 | 0.576400  |
| 7  | 6  | 0 | 2.277400  | -3.539800 | -0.220600 |
| 8  | 6  | 0 | 3.166000  | -2.913700 | -2.811500 |
| 9  | 8  | 0 | 0.154800  | 0.603000  | -1.747500 |
| 10 | 6  | 0 | 1.908500  | -0.334200 | -3.925800 |
| 11 | 1  | 0 | 1.688100  | -0.973300 | -4.785800 |
| 12 | 1  | 0 | 1.325300  | 0.584300  | -3.995600 |
| 13 | 1  | 0 | 2.975300  | -0.091100 | -3.919200 |
| 14 | 6  | 0 | 3.287100  | -4.305900 | -0.814600 |
| 15 | 6  | 0 | 3.715800  | -3.990100 | -2.102900 |
| 16 | 35 | 0 | 1.749800  | -3.964500 | 1.569800  |
| 17 | 1  | 0 | 3.736500  | -5.129400 | -0.271100 |
| 18 | 1  | 0 | 4.500300  | -4.584800 | -2.560800 |
| 19 | 1  | 0 | 3.519400  | -2.662700 | -3.805600 |
| 20 | 6  | 0 | -0.991300 | -2.321400 | -1.074400 |
| 21 | 6  | 0 | -1.194500 | -3.477600 | -0.278300 |
| 22 | 8  | 0 | -0.852600 | -4.613200 | -0.826300 |
| 23 | 6  | 0 | -0.938400 | -5.871900 | -0.105800 |
| 24 | 1  | 0 | -0.744900 | -6.636100 | -0.857000 |
| 25 | 6  | 0 | -1.731100 | -3.410300 | 1.107600  |
| 26 | 1  | 0 | -0.165400 | -5.892600 | 0.665100  |
| 27 | 1  | 0 | -1.734800 | -2.376500 | 1.450900  |
| 28 | 1  | 0 | -1.655400 | -1.496400 | -0.831400 |
| 29 | 1  | 0 | -0.889600 | -2.533700 | -2.137400 |
| 30 | 1  | 0 | -2.754600 | -3.805700 | 1.123600  |
| 31 | 1  | 0 | -1.933500 | -6.001300 | 0.323900  |
| 32 | 1  | 0 | -1.148900 | -4.021000 | 1.800000  |
| 33 | 8  | 0 | -2.120300 | 0.882100  | 0.251700  |
| 34 | 12 | 0 | -0.031500 | 1.190500  | 0.364000  |
| 35 | 8  | 0 | -0.523100 | 3.092500  | -0.265700 |
| 36 | 8  | 0 | 0.088400  | 1.619200  | 2.339600  |
| 37 | 8  | 0 | 2.049200  | 1.537300  | 0.372500  |
| 38 | 7  | 0 | -4.263000 | 1.154100  | -0.461000 |
| 39 | 1  | 0 | -4.948100 | 1.782600  | -0.866300 |
| 40 | 7  | 0 | -1.656700 | 3.768400  | 0.138500  |
| 41 | 7  | 0 | 4.170700  | 1.907100  | 1.100900  |
| 42 | 1  | 0 | 4.755300  | 2.146900  | 1.893700  |
| 43 | 7  | 0 | 0.946100  | 2.546500  | 2.892200  |
| 44 | 6  | 0 | -4.548500 | -0.229300 | -0.479200 |
| 45 | 6  | 0 | -4.824900 | -0.910000 | 0.735500  |
| 46 | 6  | 0 | -5.062400 | -2.295300 | 0.697400  |
| 47 | 1  | 0 | -5.267000 | -2.846200 | 1.605700  |

|    |   |   |           |           |           |
|----|---|---|-----------|-----------|-----------|
| 48 | 6 | 0 | -5.027100 | -2.992500 | -0.506700 |
| 49 | 1 | 0 | -5.202200 | -4.060600 | -0.515500 |
| 50 | 6 | 0 | -4.768700 | -2.323800 | -1.698700 |
| 51 | 1 | 0 | -4.751900 | -2.895500 | -2.617000 |
| 52 | 6 | 0 | -4.540800 | -0.936000 | -1.711200 |
| 53 | 6 | 0 | -4.295000 | -0.226900 | -3.041200 |
| 54 | 1 | 0 | -4.181100 | 0.865100  | -2.890300 |
| 55 | 6 | 0 | -2.995300 | -0.703500 | -3.698500 |
| 56 | 1 | 0 | -2.133500 | -0.475300 | -3.038900 |
| 57 | 1 | 0 | -2.831700 | -0.167000 | -4.657600 |
| 58 | 1 | 0 | -3.018900 | -1.793900 | -3.906500 |
| 59 | 6 | 0 | -5.486400 | -0.402100 | -3.990600 |
| 60 | 1 | 0 | -5.344600 | 0.220300  | -4.900100 |
| 61 | 1 | 0 | -6.423600 | -0.072400 | -3.492700 |
| 62 | 1 | 0 | -5.601400 | -1.459700 | -4.308700 |
| 63 | 6 | 0 | -4.884200 | -0.171400 | 2.070900  |
| 64 | 1 | 0 | -4.742600 | 0.919400  | 1.922800  |
| 65 | 6 | 0 | -6.257000 | -0.331700 | 2.736200  |
| 66 | 1 | 0 | -7.060300 | -0.018100 | 2.035500  |
| 67 | 1 | 0 | -6.320800 | 0.311300  | 3.640200  |
| 68 | 1 | 0 | -6.440300 | -1.382200 | 3.045500  |
| 69 | 6 | 0 | -3.763000 | -0.633000 | 3.009300  |
| 70 | 1 | 0 | -3.857200 | -1.712200 | 3.254000  |
| 71 | 1 | 0 | -3.793700 | -0.054100 | 3.957200  |
| 72 | 1 | 0 | -2.774200 | -0.454600 | 2.538600  |
| 73 | 6 | 0 | -3.027100 | 1.614900  | -0.179300 |
| 74 | 6 | 0 | -2.903100 | 3.113000  | -0.440500 |
| 75 | 1 | 0 | -3.756900 | 3.604800  | 0.037100  |
| 76 | 6 | 0 | -2.861500 | 3.520300  | -1.913400 |
| 77 | 1 | 0 | -3.816400 | 3.325500  | -2.406900 |
| 78 | 1 | 0 | -2.075500 | 2.964100  | -2.431100 |
| 79 | 6 | 0 | -2.542700 | 5.024300  | -1.825500 |
| 80 | 1 | 0 | -3.482900 | 5.576400  | -1.737600 |
| 81 | 6 | 0 | -1.661700 | 5.577500  | -2.964900 |
| 82 | 1 | 0 | -1.849900 | 5.066500  | -3.915700 |
| 83 | 1 | 0 | -1.879700 | 6.641800  | -3.115800 |
| 84 | 6 | 0 | -0.223700 | 5.399600  | -2.453700 |
| 85 | 1 | 0 | 0.496700  | 6.038600  | -2.975200 |
| 86 | 1 | 0 | 0.088500  | 4.358200  | -2.578100 |
| 87 | 6 | 0 | -0.329900 | 5.725300  | -0.953500 |
| 88 | 1 | 0 | 0.491200  | 5.318600  | -0.363400 |
| 89 | 1 | 0 | -0.347600 | 6.812600  | -0.807600 |
| 90 | 6 | 0 | -1.702700 | 5.189300  | -0.522300 |
| 91 | 1 | 0 | -2.193700 | 5.826500  | 0.213600  |

|     |   |   |           |           |           |
|-----|---|---|-----------|-----------|-----------|
| 92  | 6 | 0 | -1.782600 | 3.840600  | 1.651500  |
| 93  | 1 | 0 | -2.706800 | 4.390100  | 1.851900  |
| 94  | 1 | 0 | -1.892200 | 2.813900  | 1.991600  |
| 95  | 6 | 0 | -0.631400 | 4.529100  | 2.382400  |
| 96  | 1 | 0 | -0.942800 | 4.604700  | 3.430700  |
| 97  | 1 | 0 | -0.534500 | 5.563500  | 2.031700  |
| 98  | 6 | 0 | 0.769600  | 3.929700  | 2.293000  |
| 99  | 1 | 0 | 1.075000  | 3.841900  | 1.253300  |
| 100 | 1 | 0 | 1.470200  | 4.581000  | 2.822300  |
| 101 | 6 | 0 | 0.780800  | 2.526800  | 4.443400  |
| 102 | 1 | 0 | 1.025000  | 3.538500  | 4.770000  |
| 103 | 6 | 0 | -0.602000 | 2.059500  | 4.921000  |
| 104 | 1 | 0 | -1.402900 | 2.292100  | 4.218100  |
| 105 | 1 | 0 | -0.811300 | 2.592100  | 5.857500  |
| 106 | 6 | 0 | -0.450400 | 0.553600  | 5.199300  |
| 107 | 1 | 0 | -0.549600 | -0.002600 | 4.262500  |
| 108 | 1 | 0 | -1.204400 | 0.179400  | 5.900200  |
| 109 | 6 | 0 | 0.982200  | 0.428500  | 5.748000  |
| 110 | 1 | 0 | 1.394600  | -0.581600 | 5.650100  |
| 111 | 1 | 0 | 0.998200  | 0.685700  | 6.814100  |
| 112 | 6 | 0 | 1.806100  | 1.469200  | 4.955500  |
| 113 | 1 | 0 | 2.549100  | 1.955700  | 5.594200  |
| 114 | 6 | 0 | 2.517800  | 0.936600  | 3.694100  |
| 115 | 1 | 0 | 2.010300  | 0.064200  | 3.275700  |
| 116 | 1 | 0 | 3.560400  | 0.679400  | 3.889900  |
| 117 | 6 | 0 | 2.405000  | 2.117800  | 2.727400  |
| 118 | 1 | 0 | 3.005800  | 2.951500  | 3.105700  |
| 119 | 6 | 0 | 2.831200  | 1.830100  | 1.288400  |
| 120 | 6 | 0 | 4.787700  | 1.286200  | -0.014100 |
| 121 | 6 | 0 | 4.724500  | 1.895600  | -1.297000 |
| 122 | 6 | 0 | 5.253000  | 1.208700  | -2.405300 |
| 123 | 1 | 0 | 5.219400  | 1.644600  | -3.394800 |
| 124 | 6 | 0 | 5.834500  | -0.045000 | -2.256800 |
| 125 | 1 | 0 | 6.224500  | -0.564300 | -3.122900 |
| 126 | 6 | 0 | 5.934700  | -0.626000 | -0.998500 |
| 127 | 1 | 0 | 6.403800  | -1.597700 | -0.917800 |
| 128 | 6 | 0 | 5.439800  | 0.031700  | 0.142600  |
| 129 | 6 | 0 | 5.601900  | -0.629800 | 1.508500  |
| 130 | 1 | 0 | 5.223100  | 0.025100  | 2.314700  |
| 131 | 6 | 0 | 7.077800  | -0.888900 | 1.836300  |
| 132 | 1 | 0 | 7.177600  | -1.258300 | 2.879500  |
| 133 | 1 | 0 | 7.659500  | 0.053800  | 1.749800  |
| 134 | 1 | 0 | 7.520800  | -1.647600 | 1.157300  |
| 135 | 6 | 0 | 4.785200  | -1.919200 | 1.591700  |

|     |   |   |          |           |           |
|-----|---|---|----------|-----------|-----------|
| 136 | 1 | 0 | 3.721100 | -1.690700 | 1.378300  |
| 137 | 1 | 0 | 4.846300 | -2.348700 | 2.614500  |
| 138 | 1 | 0 | 5.150800 | -2.677400 | 0.868100  |
| 139 | 6 | 0 | 4.144800 | 3.292700  | -1.493900 |
| 140 | 1 | 0 | 3.764700 | 3.699800  | -0.533900 |
| 141 | 6 | 0 | 5.224900 | 4.270200  | -1.972900 |
| 142 | 1 | 0 | 6.076800 | 4.277200  | -1.259600 |
| 143 | 1 | 0 | 4.813100 | 5.301100  | -2.023500 |
| 144 | 1 | 0 | 5.603400 | 3.995400  | -2.980100 |
| 145 | 6 | 0 | 2.958900 | 3.275000  | -2.465100 |
| 146 | 1 | 0 | 3.268100 | 2.961800  | -3.484200 |
| 147 | 1 | 0 | 2.521500 | 4.292100  | -2.537700 |
| 148 | 1 | 0 | 2.172500 | 2.582100  | -2.100700 |

---

**L3a-TS1-re**

Zero-point correction= 1.26541 a.u.

Thermal correction to Gibbs Free Energy= 1.16689 a.u.

Sum of electronic and zero-point Energies= -5755.26177 a.u.

Sum of electronic and thermal Free Energies= -5755.36029 a.u.

The number of imaginary frequencies 1

Standard orientation

---

| Center<br>Number | Atomic<br>Number | Atomic<br>Type | Coordinates (Angstroms) |           |           |
|------------------|------------------|----------------|-------------------------|-----------|-----------|
|                  |                  |                | X                       | Y         | Z         |
| 1                | 6                | 0              | 1.159600                | -2.819800 | -0.990000 |
| 2                | 6                | 0              | 1.226200                | -3.734200 | 0.083900  |
| 3                | 8                | 0              | 0.819700                | -4.952000 | -0.175800 |
| 4                | 6                | 0              | 0.751200                | -5.979700 | 0.846300  |
| 5                | 6                | 0              | 1.614900                | -3.265500 | 1.436600  |
| 6                | 1                | 0              | 1.857300                | -1.989800 | -0.934700 |
| 7                | 1                | 0              | 1.046400                | -3.263000 | -1.976300 |
| 8                | 1                | 0              | 0.468700                | -6.884400 | 0.309400  |
| 9                | 1                | 0              | -0.017200               | -5.717700 | 1.575100  |
| 10               | 1                | 0              | 1.725600                | -6.109300 | 1.321600  |
| 11               | 1                | 0              | 2.632100                | -2.864100 | 1.413200  |
| 12               | 1                | 0              | 1.542700                | -4.018200 | 2.220500  |
| 13               | 1                | 0              | 0.952200                | -2.410200 | 1.658200  |
| 14               | 6                | 0              | -0.356800               | -0.978900 | -1.941800 |
| 15               | 6                | 0              | -0.445900               | -1.763900 | -0.623500 |
| 16               | 6                | 0              | -1.558500               | -2.733500 | -0.909200 |
| 17               | 6                | 0              | -1.834400               | -2.659700 | -2.291600 |
| 18               | 7                | 0              | -1.061500               | -1.631900 | -2.893800 |

|    |    |   |           |           |           |
|----|----|---|-----------|-----------|-----------|
| 19 | 8  | 0 | -0.255300 | -1.083600 | 0.446200  |
| 20 | 8  | 0 | 0.221700  | 0.112800  | -2.017500 |
| 21 | 6  | 0 | -1.119000 | -1.254300 | -4.300200 |
| 22 | 6  | 0 | -2.304200 | -3.602300 | -0.131400 |
| 23 | 6  | 0 | -2.791900 | -3.455800 | -2.900500 |
| 24 | 1  | 0 | -0.625500 | -2.014600 | -4.913900 |
| 25 | 1  | 0 | -0.603300 | -0.300300 | -4.416400 |
| 26 | 1  | 0 | -2.156100 | -1.149600 | -4.628700 |
| 27 | 6  | 0 | -3.518100 | -4.333800 | -2.082300 |
| 28 | 6  | 0 | -3.294300 | -4.406800 | -0.707800 |
| 29 | 1  | 0 | -2.994100 | -3.391500 | -3.964100 |
| 30 | 1  | 0 | -4.284000 | -4.962300 | -2.526600 |
| 31 | 1  | 0 | -3.882100 | -5.074700 | -0.088100 |
| 32 | 35 | 0 | -2.023800 | -3.687400 | 1.757000  |
| 33 | 8  | 0 | 0.250800  | 2.863600  | -0.595800 |
| 34 | 8  | 0 | -1.741700 | 1.179200  | 0.223200  |
| 35 | 12 | 0 | 0.351700  | 0.909600  | 0.058700  |
| 36 | 8  | 0 | 0.917600  | 1.289100  | 1.976700  |
| 37 | 7  | 0 | -3.833900 | 2.051400  | 0.313100  |
| 38 | 1  | 0 | -4.428000 | 2.856000  | 0.147600  |
| 39 | 7  | 0 | -0.570500 | 3.826100  | -0.038400 |
| 40 | 7  | 0 | 4.695600  | 0.422000  | 0.205100  |
| 41 | 1  | 0 | 5.421900  | 0.472900  | 0.910900  |
| 42 | 7  | 0 | 2.066300  | 1.962000  | 2.337000  |
| 43 | 6  | 0 | -4.450600 | 0.785900  | 0.459400  |
| 44 | 6  | 0 | -4.427300 | 0.127400  | 1.716700  |
| 45 | 6  | 0 | -4.939600 | -1.179200 | 1.810700  |
| 46 | 1  | 0 | -4.930000 | -1.710800 | 2.753000  |
| 47 | 6  | 0 | -5.466800 | -1.819700 | 0.693900  |
| 48 | 1  | 0 | -5.846500 | -2.829500 | 0.781400  |
| 49 | 6  | 0 | -5.516400 | -1.165000 | -0.532400 |
| 50 | 1  | 0 | -5.934200 | -1.691500 | -1.380200 |
| 51 | 6  | 0 | -5.033400 | 0.149400  | -0.667600 |
| 52 | 6  | 0 | -5.119300 | 0.846800  | -2.021500 |
| 53 | 1  | 0 | -4.782100 | 1.900100  | -1.944300 |
| 54 | 6  | 0 | -4.196900 | 0.173700  | -3.038400 |
| 55 | 1  | 0 | -3.152200 | 0.203800  | -2.664900 |
| 56 | 1  | 0 | -4.229100 | 0.718300  | -4.006200 |
| 57 | 1  | 0 | -4.493400 | -0.881600 | -3.215900 |
| 58 | 6  | 0 | -6.563000 | 0.902700  | -2.536600 |
| 59 | 1  | 0 | -6.616800 | 1.529600  | -3.452500 |
| 60 | 1  | 0 | -7.225700 | 1.358600  | -1.770000 |
| 61 | 1  | 0 | -6.946700 | -0.108200 | -2.788400 |
| 62 | 6  | 0 | -3.883200 | 0.813800  | 2.965700  |

|     |   |   |           |           |           |
|-----|---|---|-----------|-----------|-----------|
| 63  | 1 | 0 | -3.537200 | 1.841700  | 2.729000  |
| 64  | 6 | 0 | -4.975800 | 0.967700  | 4.030400  |
| 65  | 1 | 0 | -5.849500 | 1.507000  | 3.605600  |
| 66  | 1 | 0 | -4.591700 | 1.559500  | 4.888900  |
| 67  | 1 | 0 | -5.314700 | -0.018800 | 4.411400  |
| 68  | 6 | 0 | -2.672000 | 0.064700  | 3.530500  |
| 69  | 1 | 0 | -2.949100 | -0.951100 | 3.882100  |
| 70  | 1 | 0 | -2.251000 | 0.626500  | 4.390600  |
| 71  | 1 | 0 | -1.882200 | -0.025200 | 2.755900  |
| 72  | 6 | 0 | -2.503900 | 2.148500  | 0.099500  |
| 73  | 6 | 0 | -2.047800 | 3.538700  | -0.315600 |
| 74  | 1 | 0 | -2.607300 | 4.279200  | 0.265200  |
| 75  | 6 | 0 | -2.190400 | 3.865400  | -1.800900 |
| 76  | 1 | 0 | -3.240400 | 3.928800  | -2.095800 |
| 77  | 1 | 0 | -1.700000 | 3.093900  | -2.401200 |
| 78  | 6 | 0 | -1.468000 | 5.223200  | -1.899400 |
| 79  | 1 | 0 | -2.191800 | 6.016700  | -1.691300 |
| 80  | 6 | 0 | -0.710900 | 5.477500  | -3.219300 |
| 81  | 1 | 0 | -1.199600 | 4.995500  | -4.073200 |
| 82  | 1 | 0 | -0.681300 | 6.554600  | -3.424700 |
| 83  | 6 | 0 | 0.709200  | 4.951500  | -2.956100 |
| 84  | 1 | 0 | 1.449700  | 5.371200  | -3.645000 |
| 85  | 1 | 0 | 0.730300  | 3.861600  | -3.055200 |
| 86  | 6 | 0 | 0.975000  | 5.339900  | -1.490700 |
| 87  | 1 | 0 | 1.765600  | 4.755200  | -1.019400 |
| 88  | 1 | 0 | 1.255300  | 6.399100  | -1.430300 |
| 89  | 6 | 0 | -0.378600 | 5.192000  | -0.782300 |
| 90  | 1 | 0 | -0.542600 | 5.953800  | -0.019000 |
| 91  | 6 | 0 | -0.369100 | 3.948500  | 1.461600  |
| 92  | 1 | 0 | -1.052700 | 4.733000  | 1.795800  |
| 93  | 1 | 0 | -0.682800 | 2.996500  | 1.883500  |
| 94  | 6 | 0 | 1.044600  | 4.297200  | 1.921600  |
| 95  | 1 | 0 | 0.969400  | 4.495700  | 2.997200  |
| 96  | 1 | 0 | 1.358900  | 5.245800  | 1.471300  |
| 97  | 6 | 0 | 2.180200  | 3.312800  | 1.651700  |
| 98  | 1 | 0 | 2.250700  | 3.100600  | 0.587500  |
| 99  | 1 | 0 | 3.120100  | 3.749800  | 1.999100  |
| 100 | 6 | 0 | 2.150200  | 2.069800  | 3.897200  |
| 101 | 1 | 0 | 2.667600  | 3.010300  | 4.089100  |
| 102 | 6 | 0 | 0.791200  | 1.980700  | 4.608600  |
| 103 | 1 | 0 | -0.039800 | 2.319700  | 3.989800  |
| 104 | 1 | 0 | 0.845900  | 2.634100  | 5.488100  |
| 105 | 6 | 0 | 0.661000  | 0.513200  | 5.054200  |
| 106 | 1 | 0 | 0.299500  | -0.092400 | 4.217500  |



|     |   |   |           |           |           |
|-----|---|---|-----------|-----------|-----------|
| 107 | 1 | 0 | -0.034300 | 0.387900  | 5.890800  |
| 108 | 6 | 0 | 2.101200  | 0.114400  | 5.413400  |
| 109 | 1 | 0 | 2.263600  | -0.969100 | 5.416600  |
| 110 | 1 | 0 | 2.355600  | 0.486200  | 6.413300  |
| 111 | 6 | 0 | 2.974100  | 0.828000  | 4.360500  |
| 112 | 1 | 0 | 3.930800  | 1.151100  | 4.781400  |
| 113 | 6 | 0 | 3.252600  | 0.024100  | 3.074300  |
| 114 | 1 | 0 | 2.442700  | -0.673100 | 2.845000  |
| 115 | 1 | 0 | 4.194300  | -0.528700 | 3.121400  |
| 116 | 6 | 0 | 3.306700  | 1.128800  | 2.020400  |
| 117 | 1 | 0 | 4.161600  | 1.776100  | 2.240000  |
| 118 | 6 | 0 | 3.418600  | 0.680400  | 0.562300  |
| 119 | 6 | 0 | 5.052400  | -0.099700 | -1.062400 |
| 120 | 6 | 0 | 5.061100  | 0.745200  | -2.205800 |
| 121 | 6 | 0 | 5.447000  | 0.207400  | -3.447400 |
| 122 | 1 | 0 | 5.454300  | 0.821100  | -4.338400 |
| 123 | 6 | 0 | 5.869100  | -1.112700 | -3.552700 |
| 124 | 1 | 0 | 6.185200  | -1.502300 | -4.512000 |
| 125 | 6 | 0 | 5.913700  | -1.926300 | -2.426600 |
| 126 | 1 | 0 | 6.279600  | -2.937700 | -2.539500 |
| 127 | 6 | 0 | 5.492700  | -1.446700 | -1.172800 |
| 128 | 6 | 0 | 5.557900  | -2.366100 | 0.042900  |
| 129 | 1 | 0 | 4.998300  | -1.920200 | 0.891200  |
| 130 | 6 | 0 | 7.008300  | -2.538000 | 0.503000  |
| 131 | 1 | 0 | 7.048500  | -3.162400 | 1.421300  |
| 132 | 1 | 0 | 7.452900  | -1.547700 | 0.740600  |
| 133 | 1 | 0 | 7.622700  | -3.024200 | -0.285000 |
| 134 | 6 | 0 | 4.909600  | -3.732300 | -0.227500 |
| 135 | 1 | 0 | 3.928800  | -3.603100 | -0.727000 |
| 136 | 1 | 0 | 4.748900  | -4.274200 | 0.729000  |
| 137 | 1 | 0 | 5.550500  | -4.368900 | -0.873200 |
| 138 | 6 | 0 | 4.733400  | 2.232200  | -2.110200 |
| 139 | 1 | 0 | 4.491700  | 2.518300  | -1.066700 |
| 140 | 6 | 0 | 5.939900  | 3.090600  | -2.511100 |
| 141 | 1 | 0 | 6.827600  | 2.809600  | -1.904500 |
| 142 | 1 | 0 | 5.723900  | 4.164300  | -2.323100 |
| 143 | 1 | 0 | 6.187400  | 2.969600  | -3.586900 |
| 144 | 6 | 0 | 3.507100  | 2.586000  | -2.956800 |
| 145 | 1 | 0 | 3.680900  | 2.381800  | -4.034100 |
| 146 | 1 | 0 | 3.275500  | 3.664900  | -2.844100 |
| 147 | 1 | 0 | 2.626200  | 2.000300  | -2.619000 |
| 148 | 8 | 0 | 2.457300  | 0.567100  | -0.215900 |

---

**L4-Mg(II)**

Zero-point correction= 1.04415 a.u.

Thermal correction to Gibbs Free Energy= 0.96070 a.u.

Sum of electronic and zero-point Energies= -2436.11668 a.u.

Sum of electronic and thermal Free Energies= -2436.20013 a.u.

The number of imaginary frequencies 0

Standard orientation

---

| Center<br>Number | Atomic<br>Number | Atomic<br>Type | Coordinates (Angstroms) |           |           |
|------------------|------------------|----------------|-------------------------|-----------|-----------|
|                  |                  |                | X                       | Y         | Z         |
| 1                | 8                | 0              | 1.911886                | 0.274964  | 0.531961  |
| 2                | 12               | 0              | -0.026964               | 0.021182  | 0.129215  |
| 3                | 8                | 0              | -0.187625               | 1.901973  | -0.389941 |
| 4                | 8                | 0              | 0.214806                | -1.256198 | -1.326565 |
| 5                | 8                | 0              | -1.924707               | -0.526431 | 0.430108  |
| 6                | 7                | 0              | 3.944962                | 1.273063  | 0.518913  |
| 7                | 1                | 0              | 4.514196                | 2.048235  | 0.194898  |
| 8                | 7                | 0              | 0.822107                | 2.458547  | -1.160630 |
| 9                | 7                | 0              | -3.929218               | -1.346317 | -0.243414 |
| 10               | 1                | 0              | -4.444397               | -1.954525 | -0.871884 |
| 11               | 7                | 0              | -0.771173               | -1.818426 | -2.109626 |
| 12               | 6                | 0              | 4.610776                | 0.144173  | 1.053433  |
| 13               | 6                | 0              | 5.346757                | -0.711883 | 0.192235  |
| 14               | 6                | 0              | 5.965850                | -1.853197 | 0.733428  |
| 15               | 1                | 0              | 6.523274                | -2.532195 | 0.101803  |
| 16               | 6                | 0              | 5.869342                | -2.140299 | 2.090992  |
| 17               | 1                | 0              | 6.350598                | -3.023827 | 2.490469  |
| 18               | 6                | 0              | 5.160248                | -1.295552 | 2.938740  |
| 19               | 1                | 0              | 5.110060                | -1.544977 | 3.990385  |
| 20               | 6                | 0              | 4.527358                | -0.141466 | 2.442472  |
| 21               | 6                | 0              | 3.783002                | 0.778295  | 3.406117  |
| 22               | 1                | 0              | 3.367239                | 1.655782  | 2.869509  |
| 23               | 6                | 0              | 2.594867                | 0.056364  | 4.052354  |
| 24               | 1                | 0              | 1.922241                | -0.353089 | 3.268718  |
| 25               | 1                | 0              | 2.006939                | 0.767598  | 4.671352  |
| 26               | 1                | 0              | 2.932595                | -0.777388 | 4.703513  |
| 27               | 6                | 0              | 4.727139                | 1.344527  | 4.473477  |
| 28               | 1                | 0              | 4.193023                | 2.093703  | 5.096420  |
| 29               | 1                | 0              | 5.589197                | 1.852303  | 3.989905  |
| 30               | 1                | 0              | 5.110847                | 0.545852  | 5.142858  |
| 31               | 6                | 0              | 5.452565                | -0.439111 | -1.305532 |
| 32               | 1                | 0              | 4.931137                | 0.503024  | -1.572769 |
| 33               | 6                | 0              | 6.912416                | -0.258850 | -1.737882 |

---

|    |   |   |           |           |           |
|----|---|---|-----------|-----------|-----------|
| 34 | 1 | 0 | 7.392103  | 0.542825  | -1.136472 |
| 35 | 1 | 0 | 6.959318  | 0.040328  | -2.807097 |
| 36 | 1 | 0 | 7.493428  | -1.196840 | -1.613624 |
| 37 | 6 | 0 | 4.770659  | -1.547974 | -2.113625 |
| 38 | 1 | 0 | 5.285613  | -2.523179 | -1.983250 |
| 39 | 1 | 0 | 4.770678  | -1.291128 | -3.194605 |
| 40 | 1 | 0 | 3.715845  | -1.650533 | -1.785791 |
| 41 | 6 | 0 | 2.633943  | 1.257417  | 0.248251  |
| 42 | 6 | 0 | 2.125854  | 2.559231  | -0.366010 |
| 43 | 1 | 0 | 2.874441  | 2.914003  | -1.080766 |
| 44 | 6 | 0 | 1.826441  | 3.672188  | 0.641387  |
| 45 | 1 | 0 | 2.741444  | 4.022316  | 1.124361  |
| 46 | 1 | 0 | 1.142330  | 3.304683  | 1.411635  |
| 47 | 6 | 0 | 1.169923  | 4.748478  | -0.246160 |
| 48 | 1 | 0 | 1.953835  | 5.404305  | -0.635177 |
| 49 | 6 | 0 | 0.032491  | 5.558586  | 0.416723  |
| 50 | 1 | 0 | 0.176842  | 5.659472  | 1.497799  |
| 51 | 1 | 0 | 0.012914  | 6.570087  | -0.005959 |
| 52 | 6 | 0 | -1.258350 | 4.808814  | 0.043418  |
| 53 | 1 | 0 | -2.148681 | 5.443126  | 0.104315  |
| 54 | 1 | 0 | -1.408057 | 3.951330  | 0.706592  |
| 55 | 6 | 0 | -0.986762 | 4.315197  | -1.387976 |
| 56 | 1 | 0 | -1.621622 | 3.485988  | -1.695147 |
| 57 | 1 | 0 | -1.139224 | 5.135026  | -2.101001 |
| 58 | 6 | 0 | 0.506895  | 3.969399  | -1.423694 |
| 59 | 1 | 0 | 0.973985  | 4.183242  | -2.385492 |
| 60 | 6 | 0 | 1.020968  | 1.666440  | -2.446685 |
| 61 | 1 | 0 | 1.822534  | 2.179457  | -2.984371 |
| 62 | 1 | 0 | 1.380557  | 0.680073  | -2.147465 |
| 63 | 6 | 0 | -0.211687 | 1.550482  | -3.347937 |
| 64 | 1 | 0 | 0.180773  | 1.242244  | -4.325783 |
| 65 | 1 | 0 | -0.635616 | 2.545873  | -3.509705 |
| 66 | 6 | 0 | -1.361581 | 0.584254  | -2.974714 |
| 67 | 1 | 0 | -1.691833 | 0.750747  | -1.948551 |
| 68 | 1 | 0 | -2.211719 | 0.870573  | -3.604114 |
| 69 | 6 | 0 | -0.268852 | -3.186891 | -2.690692 |
| 70 | 1 | 0 | -0.821340 | -3.302614 | -3.623802 |
| 71 | 6 | 0 | 1.248834  | -3.247845 | -2.876502 |
| 72 | 1 | 0 | 1.689914  | -2.275830 | -3.106032 |
| 73 | 1 | 0 | 1.437220  | -3.906559 | -3.732872 |
| 74 | 6 | 0 | 1.786058  | -3.897812 | -1.587296 |
| 75 | 1 | 0 | 1.887464  | -3.139671 | -0.805112 |
| 76 | 1 | 0 | 2.764652  | -4.366549 | -1.733365 |
| 77 | 6 | 0 | 0.694574  | -4.916914 | -1.208181 |

|     |   |   |           |           |           |
|-----|---|---|-----------|-----------|-----------|
| 78  | 1 | 0 | 0.702538  | -5.179744 | -0.144782 |
| 79  | 1 | 0 | 0.838175  | -5.845357 | -1.772791 |
| 80  | 6 | 0 | -0.642151 | -4.262917 | -1.635954 |
| 81  | 1 | 0 | -1.314168 | -4.999164 | -2.084833 |
| 82  | 6 | 0 | -1.407900 | -3.504889 | -0.534095 |
| 83  | 1 | 0 | -0.741680 | -3.174958 | 0.268364  |
| 84  | 1 | 0 | -2.211718 | -4.098089 | -0.093228 |
| 85  | 6 | 0 | -1.971324 | -2.285076 | -1.275830 |
| 86  | 1 | 0 | -2.719673 | -2.607151 | -2.003862 |
| 87  | 6 | 0 | -2.595778 | -1.278945 | -0.315948 |
| 88  | 6 | 0 | -4.667511 | -0.626843 | 0.726404  |
| 89  | 6 | 0 | -5.243490 | 0.625160  | 0.389097  |
| 90  | 6 | 0 | -5.956747 | 1.334333  | 1.372677  |
| 91  | 1 | 0 | -6.402364 | 2.294367  | 1.148178  |
| 92  | 6 | 0 | -6.098521 | 0.821864  | 2.658186  |
| 93  | 1 | 0 | -6.644673 | 1.383815  | 3.404941  |
| 94  | 6 | 0 | -5.543427 | -0.410412 | 2.987877  |
| 95  | 1 | 0 | -5.672416 | -0.780476 | 3.996278  |
| 96  | 6 | 0 | -4.835519 | -1.160976 | 2.031526  |
| 97  | 6 | 0 | -4.263697 | -2.521551 | 2.418190  |
| 98  | 1 | 0 | -3.793620 | -3.011124 | 1.541621  |
| 99  | 6 | 0 | -5.363772 | -3.478212 | 2.895795  |
| 100 | 1 | 0 | -4.941323 | -4.493038 | 3.058271  |
| 101 | 1 | 0 | -6.161614 | -3.558482 | 2.126656  |
| 102 | 1 | 0 | -5.817699 | -3.136000 | 3.849544  |
| 103 | 6 | 0 | -3.166127 | -2.373767 | 3.477300  |
| 104 | 1 | 0 | -2.368552 | -1.693648 | 3.108872  |
| 105 | 1 | 0 | -2.702642 | -3.361385 | 3.687837  |
| 106 | 1 | 0 | -3.573136 | -1.966842 | 4.427150  |
| 107 | 6 | 0 | -5.089271 | 1.223293  | -1.005071 |
| 108 | 1 | 0 | -4.497723 | 0.548082  | -1.658017 |
| 109 | 6 | 0 | -6.450468 | 1.399308  | -1.687238 |
| 110 | 1 | 0 | -6.991704 | 0.429208  | -1.714587 |
| 111 | 1 | 0 | -6.310159 | 1.744061  | -2.734210 |
| 112 | 1 | 0 | -7.078603 | 2.144908  | -1.155495 |
| 113 | 6 | 0 | -4.326332 | 2.551071  | -0.950579 |
| 114 | 1 | 0 | -4.915103 | 3.337943  | -0.433592 |
| 115 | 1 | 0 | -4.101061 | 2.903337  | -1.979724 |
| 116 | 1 | 0 | -3.367803 | 2.412903  | -0.407570 |
| 117 | 6 | 0 | -1.109912 | -0.903390 | -3.280219 |
| 118 | 1 | 0 | -1.981635 | -1.357461 | -3.755792 |
| 119 | 1 | 0 | -0.261148 | -1.010290 | -3.958901 |

---

**L4-Mg(II)-COM**

Zero-point correction= 1.17764 a.u.

Thermal correction to Gibbs Free Energy= 1.08520 a.u.

Sum of electronic and zero-point Energies= -5562.15961 a.u.

Sum of electronic and thermal Free Energies= -5562.25205 a.u.

The number of imaginary frequencies 0

Standard orientation

| Center<br>Number | Atomic<br>Number | Atomic<br>Type | Coordinates (Angstroms) |           |           |
|------------------|------------------|----------------|-------------------------|-----------|-----------|
|                  |                  |                | X                       | Y         | Z         |
| 1                | 6                | 0              | -0.048265               | 1.328748  | -1.990783 |
| 2                | 6                | 0              | 0.430637                | 2.073266  | -0.735770 |
| 3                | 6                | 0              | 0.671542                | 3.433118  | -1.153902 |
| 4                | 6                | 0              | 0.353775                | 3.483777  | -2.536937 |
| 5                | 7                | 0              | -0.070843               | 2.210794  | -3.007569 |
| 6                | 8                | 0              | 0.517462                | 1.462716  | 0.325573  |
| 7                | 6                | 0              | 1.111491                | 4.586609  | -0.500700 |
| 8                | 6                | 0              | 0.466213                | 4.651810  | -3.264202 |
| 9                | 8                | 0              | -0.333678               | 0.129487  | -1.960190 |
| 10               | 6                | 0              | -0.477685               | 1.919050  | -4.376856 |
| 11               | 1                | 0              | 0.327898                | 2.179521  | -5.068493 |
| 12               | 1                | 0              | -0.688281               | 0.851391  | -4.445127 |
| 13               | 1                | 0              | -1.377897               | 2.486831  | -4.629416 |
| 14               | 6                | 0              | 1.234464                | 5.776795  | -1.216396 |
| 15               | 6                | 0              | 0.912657                | 5.793402  | -2.577015 |
| 16               | 35               | 0              | 1.540042                | 4.533373  | 1.344549  |
| 17               | 1                | 0              | 1.575353                | 6.681598  | -0.726688 |
| 18               | 1                | 0              | 1.012649                | 6.726483  | -3.123230 |
| 19               | 1                | 0              | 0.221743                | 4.697124  | -4.319241 |
| 20               | 8                | 0              | 1.861634                | -1.114134 | -0.143632 |
| 21               | 12               | 0              | -0.154356               | -0.702784 | 0.099345  |
| 22               | 8                | 0              | -0.515094               | -2.532137 | -0.647604 |
| 23               | 8                | 0              | -0.084277               | -0.920620 | 2.099958  |
| 24               | 8                | 0              | -2.128644               | -0.120354 | 0.314211  |
| 25               | 7                | 0              | 3.738521                | -2.200215 | -0.827569 |
| 26               | 1                | 0              | 4.149243                | -3.067654 | -1.153355 |
| 27               | 7                | 0              | 0.305762                | -3.620805 | -0.433441 |
| 28               | 7                | 0              | -4.125709               | 0.264742  | 1.327757  |
| 29               | 1                | 0              | -4.642818               | 0.348575  | 2.196027  |
| 30               | 7                | 0              | -1.075880               | -0.953578 | 3.050492  |
| 31               | 6                | 0              | 4.615480                | -1.133120 | -0.526285 |
| 32               | 6                | 0              | 5.239550                | -1.071233 | 0.746238  |
| 33               | 6                | 0              | 6.087152                | 0.013355  | 1.036742  |

|    |   |   |           |           |           |
|----|---|---|-----------|-----------|-----------|
| 34 | 1 | 0 | 6.559773  | 0.101941  | 2.006032  |
| 35 | 6 | 0 | 6.341737  | 0.993609  | 0.082931  |
| 36 | 1 | 0 | 7.002867  | 1.817293  | 0.320137  |
| 37 | 6 | 0 | 5.756539  | 0.916346  | -1.176819 |
| 38 | 1 | 0 | 5.983897  | 1.688688  | -1.899706 |
| 39 | 6 | 0 | 4.885150  | -0.138790 | -1.502741 |
| 40 | 6 | 0 | 4.257535  | -0.192244 | -2.891769 |
| 41 | 1 | 0 | 3.564377  | -1.054710 | -2.975012 |
| 42 | 6 | 0 | 3.422645  | 1.062513  | -3.170031 |
| 43 | 1 | 0 | 2.731984  | 1.247223  | -2.323729 |
| 44 | 1 | 0 | 2.818667  | 0.923800  | -4.092137 |
| 45 | 1 | 0 | 4.064119  | 1.959211  | -3.302461 |
| 46 | 6 | 0 | 5.326496  | -0.390349 | -3.972020 |
| 47 | 1 | 0 | 4.846555  | -0.507446 | -4.967442 |
| 48 | 1 | 0 | 5.913161  | -1.310627 | -3.763069 |
| 49 | 1 | 0 | 6.022105  | 0.474343  | -4.017399 |
| 50 | 6 | 0 | 4.996933  | -2.142257 | 1.804896  |
| 51 | 1 | 0 | 4.357502  | -2.955321 | 1.401781  |
| 52 | 6 | 0 | 6.307352  | -2.807780 | 2.242622  |
| 53 | 1 | 0 | 6.850273  | -3.201524 | 1.356561  |
| 54 | 1 | 0 | 6.093006  | -3.661528 | 2.920782  |
| 55 | 1 | 0 | 6.967510  | -2.095346 | 2.780555  |
| 56 | 6 | 0 | 4.247946  | -1.557016 | 3.004012  |
| 57 | 1 | 0 | 4.858248  | -0.792917 | 3.530558  |
| 58 | 1 | 0 | 3.988126  | -2.360902 | 3.725540  |
| 59 | 1 | 0 | 3.306693  | -1.086753 | 2.653240  |
| 60 | 6 | 0 | 2.413469  | -2.128393 | -0.608213 |
| 61 | 6 | 0 | 1.686288  | -3.396189 | -1.046852 |
| 62 | 1 | 0 | 2.291169  | -4.256990 | -0.743232 |
| 63 | 6 | 0 | 1.411574  | -3.483302 | -2.550343 |
| 64 | 1 | 0 | 2.340561  | -3.576360 | -3.117552 |
| 65 | 1 | 0 | 0.885116  | -2.584746 | -2.882975 |
| 66 | 6 | 0 | 0.524783  | -4.739394 | -2.649380 |
| 67 | 1 | 0 | 1.170241  | -5.611296 | -2.790011 |
| 68 | 6 | 0 | -0.592920 | -4.689143 | -3.715889 |
| 69 | 1 | 0 | -0.314721 | -4.065569 | -4.572663 |
| 70 | 1 | 0 | -0.779946 | -5.700687 | -4.095800 |
| 71 | 6 | 0 | -1.833662 | -4.171911 | -2.966402 |
| 72 | 1 | 0 | -2.771348 | -4.440923 | -3.464346 |
| 73 | 1 | 0 | -1.798424 | -3.082084 | -2.875701 |
| 74 | 6 | 0 | -1.705163 | -4.808023 | -1.571397 |
| 75 | 1 | 0 | -2.270069 | -4.288483 | -0.800327 |
| 76 | 1 | 0 | -2.050191 | -5.849296 | -1.599939 |
| 77 | 6 | 0 | -0.201902 | -4.839955 | -1.274231 |

|     |   |   |           |           |           |
|-----|---|---|-----------|-----------|-----------|
| 78  | 1 | 0 | 0.102623  | -5.718519 | -0.704095 |
| 79  | 6 | 0 | 0.413179  | -3.945299 | 1.048786  |
| 80  | 1 | 0 | 1.125955  | -4.770849 | 1.122487  |
| 81  | 1 | 0 | 0.841884  | -3.058044 | 1.517553  |
| 82  | 6 | 0 | -0.903437 | -4.337501 | 1.723275  |
| 83  | 1 | 0 | -0.615072 | -4.834626 | 2.659061  |
| 84  | 1 | 0 | -1.406396 | -5.107430 | 1.130837  |
| 85  | 6 | 0 | -1.914200 | -3.221178 | 2.063169  |
| 86  | 1 | 0 | -2.095076 | -2.600765 | 1.185695  |
| 87  | 1 | 0 | -2.865477 | -3.711729 | 2.298193  |
| 88  | 6 | 0 | -0.542446 | -0.386446 | 4.418109  |
| 89  | 1 | 0 | -1.119099 | -0.916982 | 5.176391  |
| 90  | 6 | 0 | 0.968904  | -0.545153 | 4.591322  |
| 91  | 1 | 0 | 1.357963  | -1.431181 | 4.086457  |
| 92  | 1 | 0 | 1.157470  | -0.663601 | 5.665589  |
| 93  | 6 | 0 | 1.567755  | 0.783134  | 4.095148  |
| 94  | 1 | 0 | 1.643385  | 0.768386  | 3.004592  |
| 95  | 1 | 0 | 2.564826  | 0.973416  | 4.506385  |
| 96  | 6 | 0 | 0.535242  | 1.837648  | 4.535515  |
| 97  | 1 | 0 | 0.586332  | 2.753152  | 3.935886  |
| 98  | 1 | 0 | 0.703676  | 2.119884  | 5.581281  |
| 99  | 6 | 0 | -0.839447 | 1.136686  | 4.404804  |
| 100 | 1 | 0 | -1.493520 | 1.389997  | 5.243557  |
| 101 | 6 | 0 | -1.595332 | 1.392941  | 3.087697  |
| 102 | 1 | 0 | -0.915434 | 1.697807  | 2.289255  |
| 103 | 1 | 0 | -2.373213 | 2.153007  | 3.192204  |
| 104 | 6 | 0 | -2.214274 | 0.028928  | 2.755971  |
| 105 | 1 | 0 | -2.994034 | -0.208615 | 3.484556  |
| 106 | 6 | 0 | -2.805792 | 0.009075  | 1.351579  |
| 107 | 6 | 0 | -4.829792 | 0.496714  | 0.122585  |
| 108 | 6 | 0 | -5.531768 | -0.567482 | -0.499788 |
| 109 | 6 | 0 | -6.230399 | -0.317137 | -1.694762 |
| 110 | 1 | 0 | -6.770937 | -1.109510 | -2.195716 |
| 111 | 6 | 0 | -6.239904 | 0.952892  | -2.261785 |
| 112 | 1 | 0 | -6.779209 | 1.127187  | -3.184095 |
| 113 | 6 | 0 | -5.563040 | 2.000959  | -1.647000 |
| 114 | 1 | 0 | -5.596023 | 2.978248  | -2.110468 |
| 115 | 6 | 0 | -4.859396 | 1.798396  | -0.445869 |
| 116 | 6 | 0 | -4.153975 | 2.977703  | 0.216178  |
| 117 | 1 | 0 | -3.657132 | 2.659254  | 1.153952  |
| 118 | 6 | 0 | -5.152131 | 4.071034  | 0.613508  |
| 119 | 1 | 0 | -4.631729 | 4.875911  | 1.175633  |
| 120 | 1 | 0 | -5.940031 | 3.646427  | 1.271938  |
| 121 | 1 | 0 | -5.635322 | 4.524637  | -0.277530 |

|     |   |   |           |           |           |
|-----|---|---|-----------|-----------|-----------|
| 122 | 6 | 0 | -3.053461 | 3.541365  | -0.688672 |
| 123 | 1 | 0 | -2.370829 | 2.724912  | -0.998543 |
| 124 | 1 | 0 | -2.459550 | 4.303480  | -0.140185 |
| 125 | 1 | 0 | -3.476934 | 4.014780  | -1.599456 |
| 126 | 6 | 0 | -5.528783 | -1.974467 | 0.087130  |
| 127 | 1 | 0 | -4.919787 | -2.011297 | 1.014271  |
| 128 | 6 | 0 | -6.943157 | -2.414110 | 0.480667  |
| 129 | 1 | 0 | -7.388136 | -1.680474 | 1.186701  |
| 130 | 1 | 0 | -6.907765 | -3.401606 | 0.988906  |
| 131 | 1 | 0 | -7.603472 | -2.501719 | -0.407938 |
| 132 | 6 | 0 | -4.894904 | -2.971917 | -0.888259 |
| 133 | 1 | 0 | -5.530546 | -3.123319 | -1.786149 |
| 134 | 1 | 0 | -4.754567 | -3.955113 | -0.390448 |
| 135 | 1 | 0 | -3.903498 | -2.597039 | -1.218286 |
| 136 | 6 | 0 | -1.533866 | -2.384867 | 3.296904  |
| 137 | 1 | 0 | -2.369916 | -2.308796 | 3.995117  |
| 138 | 1 | 0 | -0.696259 | -2.844279 | 3.826327  |

-----

**L4-TS1-si**

Zero-point correction= 1.29138 a.u.

Thermal correction to Gibbs Free Energy= 1.19163 a.u.

Sum of electronic and zero-point Energies= -5794.57155 a.u.

Sum of electronic and thermal Free Energies= -5794.67129 a.u.

The number of imaginary frequencies            1

Standard orientation

-----

| Center<br>Number | Atomic<br>Number | Atomic<br>Type | Coordinates (Angstroms) |           |           |
|------------------|------------------|----------------|-------------------------|-----------|-----------|
|                  |                  |                | X                       | Y         | Z         |
| 1                | 6                | 0              | 0.542299                | 0.867775  | -2.006540 |
| 2                | 6                | 0              | 1.016519                | 1.671004  | -0.776003 |
| 3                | 6                | 0              | 0.938792                | 3.088388  | -1.302948 |
| 4                | 6                | 0              | 0.727820                | 3.015266  | -2.696279 |
| 5                | 7                | 0              | 0.534505                | 1.667466  | -3.096163 |
| 6                | 8                | 0              | 0.528768                | 1.233553  | 0.338151  |
| 7                | 6                | 0              | 1.031815                | 4.340651  | -0.722740 |
| 8                | 6                | 0              | 0.650233                | 4.142573  | -3.500026 |
| 9                | 8                | 0              | 0.146821                | -0.299563 | -1.909603 |
| 10               | 6                | 0              | 0.102311                | 1.254766  | -4.424796 |
| 11               | 1                | 0              | 0.868677                | 1.505474  | -5.163733 |
| 12               | 1                | 0              | -0.048830               | 0.174955  | -4.410142 |
| 13               | 1                | 0              | -0.837186               | 1.749343  | -4.691552 |
| 14               | 6                | 0              | 0.946468                | 5.503719  | -1.496912 |

-----



|    |    |   |           |           |           |
|----|----|---|-----------|-----------|-----------|
| 15 | 6  | 0 | 0.769541  | 5.391907  | -2.875424 |
| 16 | 35 | 0 | 1.234216  | 4.511402  | 1.174412  |
| 17 | 1  | 0 | 1.011390  | 6.478978  | -1.027643 |
| 18 | 1  | 0 | 0.706744  | 6.294899  | -3.475145 |
| 19 | 1  | 0 | 0.482785  | 4.068227  | -4.568725 |
| 20 | 6  | 0 | 2.837059  | 1.257440  | -0.896339 |
| 21 | 6  | 0 | 3.582064  | 2.137646  | -0.066100 |
| 22 | 8  | 0 | 4.111791  | 3.167608  | -0.665959 |
| 23 | 6  | 0 | 4.835169  | 4.193586  | 0.066850  |
| 24 | 1  | 0 | 5.283738  | 4.820662  | -0.701939 |
| 25 | 6  | 0 | 3.722650  | 1.928087  | 1.397615  |
| 26 | 1  | 0 | 4.128938  | 4.772943  | 0.665512  |
| 27 | 1  | 0 | 4.727824  | 1.543177  | 1.617074  |
| 28 | 1  | 0 | 2.781817  | 0.238717  | -0.522484 |
| 29 | 1  | 0 | 3.092234  | 1.347680  | -1.949687 |
| 30 | 1  | 0 | 3.606917  | 2.855572  | 1.961344  |
| 31 | 1  | 0 | 5.606989  | 3.741691  | 0.692278  |
| 32 | 1  | 0 | 2.982502  | 1.202615  | 1.733623  |
| 33 | 8  | 0 | 1.566064  | -1.751289 | 0.234124  |
| 34 | 12 | 0 | -0.295221 | -0.723391 | 0.249122  |
| 35 | 8  | 0 | -1.068314 | -2.533785 | -0.319183 |
| 36 | 8  | 0 | -0.497309 | -0.839505 | 2.268853  |
| 37 | 8  | 0 | -2.250497 | 0.062096  | 0.181988  |
| 38 | 7  | 0 | 3.124547  | -3.291690 | -0.389484 |
| 39 | 1  | 0 | 3.294404  | -4.215836 | -0.770680 |
| 40 | 7  | 0 | -0.560541 | -3.769947 | 0.020186  |
| 41 | 7  | 0 | -4.240531 | 0.822842  | 0.997154  |
| 42 | 1  | 0 | -4.794824 | 1.020431  | 1.821762  |
| 43 | 7  | 0 | -1.547968 | -0.562212 | 3.106569  |
| 44 | 6  | 0 | 4.204423  | -2.378976 | -0.374592 |
| 45 | 6  | 0 | 4.776320  | -1.981432 | 0.861794  |
| 46 | 6  | 0 | 5.785311  | -1.002179 | 0.860562  |
| 47 | 1  | 0 | 6.230290  | -0.666156 | 1.787704  |
| 48 | 6  | 0 | 6.230078  | -0.437710 | -0.330472 |
| 49 | 1  | 0 | 7.001351  | 0.321481  | -0.311688 |
| 50 | 6  | 0 | 5.699210  | -0.855237 | -1.546148 |
| 51 | 1  | 0 | 6.078487  | -0.406718 | -2.454783 |
| 52 | 6  | 0 | 4.693744  | -1.837783 | -1.594230 |
| 53 | 6  | 0 | 4.157459  | -2.293973 | -2.948557 |
| 54 | 1  | 0 | 3.398720  | -3.089955 | -2.820522 |
| 55 | 6  | 0 | 3.456569  | -1.150236 | -3.688925 |
| 56 | 1  | 0 | 2.612044  | -0.771785 | -3.079685 |
| 57 | 1  | 0 | 3.038239  | -1.515876 | -4.651047 |
| 58 | 1  | 0 | 4.154727  | -0.314535 | -3.905199 |

|     |   |   |           |           |           |
|-----|---|---|-----------|-----------|-----------|
| 59  | 6 | 0 | 5.271868  | -2.901828 | -3.808907 |
| 60  | 1 | 0 | 4.842904  | -3.340144 | -4.735511 |
| 61  | 1 | 0 | 5.784526  | -3.715050 | -3.251511 |
| 62  | 1 | 0 | 6.023061  | -2.138059 | -4.101189 |
| 63  | 6 | 0 | 4.330681  | -2.600665 | 2.183340  |
| 64  | 1 | 0 | 3.577043  | -3.396760 | 2.007749  |
| 65  | 6 | 0 | 5.500934  | -3.279025 | 2.906449  |
| 66  | 1 | 0 | 5.985737  | -4.021471 | 2.236908  |
| 67  | 1 | 0 | 5.131701  | -3.818411 | 3.804999  |
| 68  | 1 | 0 | 6.262076  | -2.540053 | 3.234182  |
| 69  | 6 | 0 | 3.662580  | -1.556005 | 3.081927  |
| 70  | 1 | 0 | 4.369484  | -0.745656 | 3.358750  |
| 71  | 1 | 0 | 3.291427  | -2.033356 | 4.013703  |
| 72  | 1 | 0 | 2.793807  | -1.114203 | 2.554192  |
| 73  | 6 | 0 | 1.852667  | -2.885621 | -0.185429 |
| 74  | 6 | 0 | 0.839547  | -3.962246 | -0.550384 |
| 75  | 1 | 0 | 1.200158  | -4.917818 | -0.155771 |
| 76  | 6 | 0 | 0.581208  | -4.109552 | -2.052830 |
| 77  | 1 | 0 | 1.459843  | -4.504438 | -2.567396 |
| 78  | 1 | 0 | 0.322937  | -3.138304 | -2.481953 |
| 79  | 6 | 0 | -0.604446 | -5.092813 | -2.087492 |
| 80  | 1 | 0 | -0.209370 | -6.111380 | -2.143493 |
| 81  | 6 | 0 | -1.657273 | -4.841702 | -3.191034 |
| 82  | 1 | 0 | -1.218864 | -4.367845 | -4.076337 |
| 83  | 1 | 0 | -2.084659 | -5.799052 | -3.512470 |
| 84  | 6 | 0 | -2.742976 | -3.981887 | -2.519883 |
| 85  | 1 | 0 | -3.711257 | -4.057729 | -3.026275 |
| 86  | 1 | 0 | -2.446090 | -2.929048 | -2.509776 |
| 87  | 6 | 0 | -2.790037 | -4.512539 | -1.075642 |
| 88  | 1 | 0 | -3.207582 | -3.801605 | -0.365571 |
| 89  | 1 | 0 | -3.388187 | -5.431380 | -1.029843 |
| 90  | 6 | 0 | -1.346139 | -4.892596 | -0.732809 |
| 91  | 1 | 0 | -1.276227 | -5.767116 | -0.084740 |
| 92  | 6 | 0 | -0.565227 | -3.979923 | 1.526963  |
| 93  | 1 | 0 | -0.039044 | -4.922819 | 1.700602  |
| 94  | 1 | 0 | 0.016991  | -3.155909 | 1.941203  |
| 95  | 6 | 0 | -1.952674 | -4.044765 | 2.167050  |
| 96  | 1 | 0 | -1.794790 | -4.467100 | 3.168420  |
| 97  | 1 | 0 | -2.568265 | -4.778631 | 1.638063  |
| 98  | 6 | 0 | -2.744193 | -2.728955 | 2.309985  |
| 99  | 1 | 0 | -2.731897 | -2.190843 | 1.362425  |
| 100 | 1 | 0 | -3.787534 | -2.998340 | 2.509414  |
| 101 | 6 | 0 | -1.036597 | 0.094359  | 4.441671  |
| 102 | 1 | 0 | -1.740369 | -0.241437 | 5.203148  |

|     |   |   |           |           |           |
|-----|---|---|-----------|-----------|-----------|
| 103 | 6 | 0 | 0.414533  | -0.262325 | 4.772982  |
| 104 | 1 | 0 | 0.706720  | -1.240501 | 4.385793  |
| 105 | 1 | 0 | 0.501921  | -0.291260 | 5.866188  |
| 106 | 6 | 0 | 1.239679  | 0.904580  | 4.205417  |
| 107 | 1 | 0 | 1.364027  | 0.761426  | 3.129137  |
| 108 | 1 | 0 | 2.230097  | 0.989204  | 4.665891  |
| 109 | 6 | 0 | 0.352621  | 2.136646  | 4.452935  |
| 110 | 1 | 0 | 0.602720  | 2.975729  | 3.795259  |
| 111 | 1 | 0 | 0.460575  | 2.483722  | 5.487554  |
| 112 | 6 | 0 | -1.090202 | 1.631431  | 4.219919  |
| 113 | 1 | 0 | -1.789185 | 2.082530  | 4.930250  |
| 114 | 6 | 0 | -1.639617 | 1.816590  | 2.791403  |
| 115 | 1 | 0 | -0.840626 | 1.879039  | 2.047848  |
| 116 | 1 | 0 | -2.273334 | 2.702843  | 2.700441  |
| 117 | 6 | 0 | -2.465301 | 0.543585  | 2.574876  |
| 118 | 1 | 0 | -3.321873 | 0.545059  | 3.255031  |
| 119 | 6 | 0 | -2.963984 | 0.408088  | 1.137667  |
| 120 | 6 | 0 | -4.885134 | 0.934849  | -0.257645 |
| 121 | 6 | 0 | -5.830774 | -0.047675 | -0.651906 |
| 122 | 6 | 0 | -6.532120 | 0.124124  | -1.859208 |
| 123 | 1 | 0 | -7.268571 | -0.600847 | -2.179695 |
| 124 | 6 | 0 | -6.295598 | 1.228920  | -2.669227 |
| 125 | 1 | 0 | -6.839236 | 1.342003  | -3.598505 |
| 126 | 6 | 0 | -5.373869 | 2.196015  | -2.284113 |
| 127 | 1 | 0 | -5.227582 | 3.052247  | -2.929091 |
| 128 | 6 | 0 | -4.668436 | 2.078975  | -1.072333 |
| 129 | 6 | 0 | -3.722448 | 3.198221  | -0.650909 |
| 130 | 1 | 0 | -3.247608 | 2.967247  | 0.323168  |
| 131 | 6 | 0 | -4.478100 | 4.517359  | -0.453594 |
| 132 | 1 | 0 | -3.792619 | 5.292657  | -0.048501 |
| 133 | 1 | 0 | -5.306102 | 4.377299  | 0.274141  |
| 134 | 1 | 0 | -4.900866 | 4.891053  | -1.410080 |
| 135 | 6 | 0 | -2.582489 | 3.365846  | -1.659541 |
| 136 | 1 | 0 | -2.053922 | 2.399049  | -1.795139 |
| 137 | 1 | 0 | -1.856045 | 4.115914  | -1.283817 |
| 138 | 1 | 0 | -2.955110 | 3.710081  | -2.647033 |
| 139 | 6 | 0 | -6.107284 | -1.277061 | 0.206340  |
| 140 | 1 | 0 | -5.386312 | -1.333437 | 1.048593  |
| 141 | 6 | 0 | -7.506587 | -1.204179 | 0.824767  |
| 142 | 1 | 0 | -7.605816 | -0.280673 | 1.434578  |
| 143 | 1 | 0 | -7.676247 | -2.076603 | 1.491619  |
| 144 | 1 | 0 | -8.293698 | -1.199934 | 0.040732  |
| 145 | 6 | 0 | -5.932341 | -2.571316 | -0.598320 |
| 146 | 1 | 0 | -6.774812 | -2.730275 | -1.304085 |

|     |   |   |           |           |           |
|-----|---|---|-----------|-----------|-----------|
| 147 | 1 | 0 | -5.886138 | -3.444657 | 0.087112  |
| 148 | 1 | 0 | -4.991664 | -2.528764 | -1.183696 |
| 149 | 6 | 0 | -2.282158 | -1.841882 | 3.476208  |
| 150 | 1 | 0 | -3.127564 | -1.531556 | 4.095068  |
| 151 | 1 | 0 | -1.577262 | -2.379016 | 4.115105  |

---

**L4-TS1-re**

Zero-point correction= 1.29181 a.u.

Thermal correction to Gibbs Free Energy= 1.18811 a.u.

Sum of electronic and zero-point Energies= -5794.55933 a.u.

Sum of electronic and thermal Free Energies= -5794.66302 a.u.

The number of imaginary frequencies        1

Standard orientation

---

| Center<br>Number | Atomic<br>Number | Atomic<br>Type | Coordinates (Angstroms) |           |           |
|------------------|------------------|----------------|-------------------------|-----------|-----------|
|                  |                  |                | X                       | Y         | Z         |
| 1                | 6                | 0              | -0.466837               | -3.049800 | -1.599163 |
| 2                | 6                | 0              | -1.090085               | -4.148359 | -0.951993 |
| 3                | 8                | 0              | -2.038406               | -4.741908 | -1.622112 |
| 4                | 6                | 0              | -2.846292               | -5.806771 | -1.049360 |
| 5                | 6                | 0              | -0.711740               | -4.521690 | 0.433721  |
| 6                | 1                | 0              | 0.524369                | -2.822734 | -1.221471 |
| 7                | 1                | 0              | -0.551904               | -3.063311 | -2.683874 |
| 8                | 1                | 0              | -3.496145               | -6.125658 | -1.862606 |
| 9                | 1                | 0              | -3.438204               | -5.406386 | -0.224183 |
| 10               | 1                | 0              | -2.210060               | -6.631277 | -0.723732 |
| 11               | 1                | 0              | 0.301509                | -4.943307 | 0.419334  |
| 12               | 1                | 0              | -1.384222               | -5.233267 | 0.910032  |
| 13               | 1                | 0              | -0.666511               | -3.595208 | 1.019283  |
| 14               | 6                | 0              | -0.742119               | -0.568593 | -2.120456 |
| 15               | 6                | 0              | -1.300652               | -1.465584 | -0.997341 |
| 16               | 6                | 0              | -2.734940               | -1.635392 | -1.440243 |
| 17               | 6                | 0              | -2.825920               | -1.171628 | -2.770069 |
| 18               | 7                | 0              | -1.599389               | -0.579911 | -3.168657 |
| 19               | 8                | 0              | -0.874969               | -1.185417 | 0.187291  |
| 20               | 8                | 0              | 0.293644                | 0.090913  | -1.978092 |
| 21               | 6                | 0              | -1.334630               | 0.018204  | -4.470556 |
| 22               | 6                | 0              | -3.871102               | -2.151665 | -0.843852 |
| 23               | 6                | 0              | -3.999090               | -1.249355 | -3.505147 |
| 24               | 1                | 0              | -2.194295               | 0.600872  | -4.808944 |
| 25               | 1                | 0              | -1.123820               | -0.762534 | -5.208807 |
| 26               | 1                | 0              | -0.466345               | 0.671914  | -4.375614 |

|    |    |   |           |           |           |
|----|----|---|-----------|-----------|-----------|
| 27 | 6  | 0 | -5.130110 | -1.775903 | -2.864567 |
| 28 | 6  | 0 | -5.082957 | -2.215463 | -1.542091 |
| 29 | 1  | 0 | -4.052958 | -0.898190 | -4.529950 |
| 30 | 1  | 0 | -6.069052 | -1.834048 | -3.406861 |
| 31 | 1  | 0 | -5.972483 | -2.602565 | -1.058138 |
| 32 | 35 | 0 | -3.803079 | -2.784856 | 0.959656  |
| 33 | 8  | 0 | 1.388888  | 2.231016  | -0.054832 |
| 34 | 8  | 0 | -1.260418 | 1.577398  | 0.380309  |
| 35 | 12 | 0 | 0.532202  | 0.398544  | 0.250346  |
| 36 | 8  | 0 | 0.886066  | 0.162758  | 2.239976  |
| 37 | 7  | 0 | -2.703508 | 3.336272  | 0.522424  |
| 38 | 1  | 0 | -2.809558 | 4.342340  | 0.456406  |
| 39 | 7  | 0 | 1.015326  | 3.442227  | 0.486222  |
| 40 | 7  | 0 | 4.507406  | -1.317300 | 0.529296  |
| 41 | 1  | 0 | 5.116231  | -1.546914 | 1.306664  |
| 42 | 7  | 0 | 1.962214  | -0.264592 | 2.974066  |
| 43 | 6  | 0 | -3.871581 | 2.542599  | 0.419844  |
| 44 | 6  | 0 | -4.328748 | 1.803030  | 1.540827  |
| 45 | 6  | 0 | -5.407426 | 0.914432  | 1.377366  |
| 46 | 1  | 0 | -5.771962 | 0.327050  | 2.209637  |
| 47 | 6  | 0 | -6.031038 | 0.770810  | 0.142431  |
| 48 | 1  | 0 | -6.851828 | 0.074175  | 0.030905  |
| 49 | 6  | 0 | -5.619538 | 1.535671  | -0.943888 |
| 50 | 1  | 0 | -6.136346 | 1.411609  | -1.886272 |
| 51 | 6  | 0 | -4.561265 | 2.453998  | -0.818403 |
| 52 | 6  | 0 | -4.173738 | 3.320083  | -2.012284 |
| 53 | 1  | 0 | -3.404626 | 4.062007  | -1.724033 |
| 54 | 6  | 0 | -3.558964 | 2.471038  | -3.123434 |
| 55 | 1  | 0 | -2.672429 | 1.935042  | -2.726622 |
| 56 | 1  | 0 | -3.222351 | 3.118420  | -3.961358 |
| 57 | 1  | 0 | -4.290080 | 1.733909  | -3.516716 |
| 58 | 6  | 0 | -5.365621 | 4.133570  | -2.533259 |
| 59 | 1  | 0 | -5.024590 | 4.856060  | -3.305646 |
| 60 | 1  | 0 | -5.826257 | 4.712206  | -1.704092 |
| 61 | 1  | 0 | -6.139188 | 3.480956  | -2.989763 |
| 62 | 6  | 0 | -3.704336 | 1.981585  | 2.919688  |
| 63 | 1  | 0 | -2.882535 | 2.727707  | 2.884112  |
| 64 | 6  | 0 | -4.729932 | 2.521635  | 3.923611  |
| 65 | 1  | 0 | -5.179460 | 3.463149  | 3.541292  |
| 66 | 1  | 0 | -4.234298 | 2.748097  | 4.892113  |
| 67 | 1  | 0 | -5.541767 | 1.787109  | 4.110458  |
| 68 | 6  | 0 | -3.087416 | 0.673865  | 3.419987  |
| 69 | 1  | 0 | -3.855959 | -0.115707 | 3.553735  |
| 70 | 1  | 0 | -2.589891 | 0.841198  | 4.398420  |

|     |   |   |           |           |           |
|-----|---|---|-----------|-----------|-----------|
| 71  | 1 | 0 | -2.328419 | 0.319759  | 2.693033  |
| 72  | 6 | 0 | -1.473169 | 2.798549  | 0.351566  |
| 73  | 6 | 0 | -0.399631 | 3.836738  | 0.061479  |
| 74  | 1 | 0 | -0.629502 | 4.758734  | 0.605715  |
| 75  | 6 | 0 | -0.225296 | 4.163024  | -1.423924 |
| 76  | 1 | 0 | -1.095579 | 4.688251  | -1.822262 |
| 77  | 1 | 0 | -0.077255 | 3.239915  | -1.990002 |
| 78  | 6 | 0 | 1.038829  | 5.044168  | -1.418679 |
| 79  | 1 | 0 | 0.733589  | 6.087805  | -1.299065 |
| 80  | 6 | 0 | 1.985898  | 4.872048  | -2.627717 |
| 81  | 1 | 0 | 1.446149  | 4.581849  | -3.536022 |
| 82  | 1 | 0 | 2.485526  | 5.825558  | -2.837217 |
| 83  | 6 | 0 | 3.020972  | 3.826125  | -2.177487 |
| 84  | 1 | 0 | 3.954556  | 3.887178  | -2.747056 |
| 85  | 1 | 0 | 2.619242  | 2.814915  | -2.291646 |
| 86  | 6 | 0 | 3.222184  | 4.130258  | -0.682391 |
| 87  | 1 | 0 | 3.607499  | 3.282213  | -0.118692 |
| 88  | 1 | 0 | 3.916945  | 4.970121  | -0.556968 |
| 89  | 6 | 0 | 1.852103  | 4.588548  | -0.170335 |
| 90  | 1 | 0 | 1.915727  | 5.364415  | 0.593588  |
| 91  | 6 | 0 | 1.127606  | 3.437499  | 2.003599  |
| 92  | 1 | 0 | 0.686335  | 4.379328  | 2.340196  |
| 93  | 1 | 0 | 0.504649  | 2.606785  | 2.339591  |
| 94  | 6 | 0 | 2.547532  | 3.316325  | 2.555958  |
| 95  | 1 | 0 | 2.478866  | 3.605022  | 3.613045  |
| 96  | 1 | 0 | 3.191568  | 4.070383  | 2.093336  |
| 97  | 6 | 0 | 3.232761  | 1.940290  | 2.462438  |
| 98  | 1 | 0 | 3.123586  | 1.557200  | 1.448008  |
| 99  | 1 | 0 | 4.302567  | 2.097322  | 2.636719  |
| 100 | 6 | 0 | 1.489523  | -1.113508 | 4.215541  |
| 101 | 1 | 0 | 2.209727  | -0.885885 | 5.000647  |
| 102 | 6 | 0 | 0.047421  | -0.816201 | 4.630256  |
| 103 | 1 | 0 | -0.254034 | 0.194038  | 4.351764  |
| 104 | 1 | 0 | -0.004840 | -0.899761 | 5.722683  |
| 105 | 6 | 0 | -0.793387 | -1.927854 | 3.974648  |
| 106 | 1 | 0 | -0.999523 | -1.673734 | 2.930566  |
| 107 | 1 | 0 | -1.751169 | -2.085696 | 4.482089  |
| 108 | 6 | 0 | 0.126699  | -3.159441 | 4.045954  |
| 109 | 1 | 0 | -0.149807 | -3.949396 | 3.339028  |
| 110 | 1 | 0 | 0.094565  | -3.596263 | 5.051579  |
| 111 | 6 | 0 | 1.541557  | -2.601913 | 3.775805  |
| 112 | 1 | 0 | 2.302199  | -3.138366 | 4.350417  |
| 113 | 6 | 0 | 1.974635  | -2.559565 | 2.299639  |
| 114 | 1 | 0 | 1.119265  | -2.451759 | 1.628838  |

|     |   |   |          |           |           |
|-----|---|---|----------|-----------|-----------|
| 115 | 1 | 0 | 2.555344 | -3.435422 | 1.998785  |
| 116 | 6 | 0 | 2.824188 | -1.290519 | 2.230956  |
| 117 | 1 | 0 | 3.713658 | -1.415218 | 2.852710  |
| 118 | 6 | 0 | 3.233783 | -0.953692 | 0.798208  |
| 119 | 6 | 0 | 5.122285 | -1.173086 | -0.739460 |
| 120 | 6 | 0 | 6.099769 | -0.158708 | -0.929905 |
| 121 | 6 | 0 | 6.841537 | -0.135819 | -2.124636 |
| 122 | 1 | 0 | 7.610841 | 0.607374  | -2.286005 |
| 123 | 6 | 0 | 6.614522 | -1.075712 | -3.121650 |
| 124 | 1 | 0 | 7.195772 | -1.044388 | -4.034337 |
| 125 | 6 | 0 | 5.662131 | -2.071154 | -2.941587 |
| 126 | 1 | 0 | 5.538455 | -2.805670 | -3.726007 |
| 127 | 6 | 0 | 4.906576 | -2.145806 | -1.755836 |
| 128 | 6 | 0 | 3.941297 | -3.312293 | -1.567580 |
| 129 | 1 | 0 | 3.362891 | -3.197543 | -0.629276 |
| 130 | 6 | 0 | 4.706016 | -4.634795 | -1.445104 |
| 131 | 1 | 0 | 4.000423 | -5.466714 | -1.233111 |
| 132 | 1 | 0 | 5.431818 | -4.579373 | -0.605634 |
| 133 | 1 | 0 | 5.257752 | -4.871279 | -2.379821 |
| 134 | 6 | 0 | 2.914595 | -3.382693 | -2.706481 |
| 135 | 1 | 0 | 2.397157 | -2.406521 | -2.818747 |
| 136 | 1 | 0 | 2.156331 | -4.163798 | -2.486162 |
| 137 | 1 | 0 | 3.391153 | -3.643494 | -3.674111 |
| 138 | 6 | 0 | 6.392096 | 0.875231  | 0.151434  |
| 139 | 1 | 0 | 5.590828 | 0.859724  | 0.917506  |
| 140 | 6 | 0 | 7.704797 | 0.545859  | 0.868347  |
| 141 | 1 | 0 | 7.650307 | -0.469465 | 1.316419  |
| 142 | 1 | 0 | 7.887587 | 1.274516  | 1.687105  |
| 143 | 1 | 0 | 8.563850 | 0.578431  | 0.164387  |
| 144 | 6 | 0 | 6.421979 | 2.304188  | -0.411000 |
| 145 | 1 | 0 | 7.368826 | 2.509579  | -0.953694 |
| 146 | 1 | 0 | 6.335483 | 3.041671  | 0.415413  |
| 147 | 1 | 0 | 5.578727 | 2.460024  | -1.114410 |
| 148 | 8 | 0 | 2.439374 | -0.525234 | -0.053762 |
| 149 | 6 | 0 | 2.748248 | 0.922570  | 3.506502  |
| 150 | 1 | 0 | 3.588365 | 0.498767  | 4.062696  |
| 151 | 1 | 0 | 2.068722 | 1.386635  | 4.225285  |

---

### L5-Mg(II)

Zero-point correction= 1.07239 a.u.

Thermal correction to Gibbs Free Energy= 0.98827 a.u.

Sum of electronic and zero-point Energies= -2475.42278 a.u.

Sum of electronic and thermal Free Energies= -2475.50691 a.u.

The number of imaginary frequencies      0

Standard orientation

---

| Center<br>Number | Atomic<br>Number | Atomic<br>Type | Coordinates (Angstroms) |           |           |
|------------------|------------------|----------------|-------------------------|-----------|-----------|
|                  |                  |                | X                       | Y         | Z         |
| 1                | 8                | 0              | 1.799885                | 0.406981  | 0.723451  |
| 2                | 12               | 0              | -0.007247               | 0.039940  | -0.030289 |
| 3                | 8                | 0              | -0.155858               | 1.857527  | -0.721484 |
| 4                | 8                | 0              | 0.255953                | -1.547173 | -1.131368 |
| 5                | 8                | 0              | -1.872953               | -0.556018 | 0.379741  |
| 6                | 7                | 0              | 3.818570                | 1.432305  | 0.772851  |
| 7                | 1                | 0              | 4.374365                | 2.248861  | 0.539771  |
| 8                | 7                | 0              | 0.902059                | 2.675322  | -1.073134 |
| 9                | 7                | 0              | -3.829232               | -1.650741 | 0.070140  |
| 10               | 1                | 0              | -4.339219               | -2.395937 | -0.393463 |
| 11               | 7                | 0              | -0.748008               | -2.089950 | -1.912324 |
| 12               | 6                | 0              | 4.505144                | 0.253993  | 1.149935  |
| 13               | 6                | 0              | 5.094534                | -0.565966 | 0.152651  |
| 14               | 6                | 0              | 5.693615                | -1.779505 | 0.536344  |
| 15               | 1                | 0              | 6.126118                | -2.440943 | -0.202500 |
| 16               | 6                | 0              | 5.733166                | -2.162840 | 1.873204  |
| 17               | 1                | 0              | 6.198027                | -3.100252 | 2.150882  |
| 18               | 6                | 0              | 5.174486                | -1.349389 | 2.854195  |
| 19               | 1                | 0              | 5.219802                | -1.678110 | 3.884015  |
| 20               | 6                | 0              | 4.554539                | -0.133117 | 2.514304  |
| 21               | 6                | 0              | 3.942420                | 0.732416  | 3.611017  |
| 22               | 1                | 0              | 3.531672                | 1.671424  | 3.185085  |
| 23               | 6                | 0              | 2.772248                | 0.011167  | 4.289159  |
| 24               | 1                | 0              | 2.016004                | -0.285642 | 3.531068  |
| 25               | 1                | 0              | 2.278110                | 0.687129  | 5.019602  |
| 26               | 1                | 0              | 3.114300                | -0.897677 | 4.828144  |
| 27               | 6                | 0              | 4.996882                | 1.158278  | 4.639935  |
| 28               | 1                | 0              | 4.555491                | 1.877973  | 5.362538  |
| 29               | 1                | 0              | 5.846805                | 1.661047  | 4.130539  |
| 30               | 1                | 0              | 5.384673                | 0.288184  | 5.210395  |
| 31               | 6                | 0              | 5.045425                | -0.182440 | -1.323448 |
| 32               | 1                | 0              | 4.618709                | 0.834065  | -1.451450 |
| 33               | 6                | 0              | 6.447115                | -0.132801 | -1.943906 |
| 34               | 1                | 0              | 7.104701                | 0.537408  | -1.349761 |
| 35               | 1                | 0              | 6.391035                | 0.270245  | -2.977792 |
| 36               | 1                | 0              | 6.910106                | -1.140715 | -1.991407 |
| 37               | 6                | 0              | 4.131573                | -1.136045 | -2.097086 |
| 38               | 1                | 0              | 4.531181                | -2.172224 | -2.092585 |



|    |   |   |           |           |           |
|----|---|---|-----------|-----------|-----------|
| 39 | 1 | 0 | 4.028166  | -0.800434 | -3.151121 |
| 40 | 1 | 0 | 3.122415  | -1.137237 | -1.634487 |
| 41 | 6 | 0 | 2.504439  | 1.425046  | 0.523951  |
| 42 | 6 | 0 | 1.942020  | 2.763274  | 0.054794  |
| 43 | 1 | 0 | 2.758742  | 3.359024  | -0.359062 |
| 44 | 6 | 0 | 1.218161  | 3.584936  | 1.119501  |
| 45 | 1 | 0 | 1.913220  | 3.927412  | 1.889545  |
| 46 | 1 | 0 | 0.435399  | 2.987982  | 1.596369  |
| 47 | 6 | 0 | 0.633252  | 4.743917  | 0.285619  |
| 48 | 1 | 0 | 1.371520  | 5.549532  | 0.245201  |
| 49 | 6 | 0 | -0.746335 | 5.265430  | 0.745624  |
| 50 | 1 | 0 | -0.887838 | 5.152872  | 1.825865  |
| 51 | 1 | 0 | -0.826488 | 6.334100  | 0.514937  |
| 52 | 6 | 0 | -1.767799 | 4.470970  | -0.086665 |
| 53 | 1 | 0 | -2.737032 | 4.975187  | -0.158640 |
| 54 | 1 | 0 | -1.932667 | 3.483693  | 0.356238  |
| 55 | 6 | 0 | -1.080344 | 4.321904  | -1.455455 |
| 56 | 1 | 0 | -1.485930 | 3.517803  | -2.069299 |
| 57 | 1 | 0 | -1.181427 | 5.255150  | -2.023448 |
| 58 | 6 | 0 | 0.413943  | 4.159355  | -1.145038 |
| 59 | 1 | 0 | 1.058733  | 4.621454  | -1.893172 |
| 60 | 6 | 0 | 1.554515  | 2.195444  | -2.365366 |
| 61 | 1 | 0 | 2.424165  | 2.841682  | -2.513005 |
| 62 | 1 | 0 | 1.912296  | 1.186065  | -2.148125 |
| 63 | 6 | 0 | -0.500453 | 1.238758  | -3.715387 |
| 64 | 6 | 0 | -1.248240 | -1.084864 | -2.957348 |
| 65 | 1 | 0 | -1.926743 | -0.425722 | -2.411538 |
| 66 | 1 | 0 | -1.846153 | -1.653887 | -3.671726 |
| 67 | 6 | 0 | -0.250443 | -3.432635 | -2.525934 |
| 68 | 1 | 0 | -0.850316 | -3.561832 | -3.426990 |
| 69 | 6 | 0 | 1.255608  | -3.488971 | -2.795707 |
| 70 | 1 | 0 | 1.678774  | -2.524831 | -3.079672 |
| 71 | 1 | 0 | 1.392734  | -4.168688 | -3.645905 |
| 72 | 6 | 0 | 1.875863  | -4.108599 | -1.530325 |
| 73 | 1 | 0 | 2.020944  | -3.335521 | -0.770766 |
| 74 | 1 | 0 | 2.846683  | -4.574382 | -1.729330 |
| 75 | 6 | 0 | 0.818528  | -5.129744 | -1.065429 |
| 76 | 1 | 0 | 0.885499  | -5.357800 | 0.003752  |
| 77 | 1 | 0 | 0.949013  | -6.073910 | -1.606571 |
| 78 | 6 | 0 | -0.551318 | -4.512247 | -1.441987 |
| 79 | 1 | 0 | -1.217377 | -5.270022 | -1.863295 |
| 80 | 6 | 0 | -1.303359 | -3.775041 | -0.309284 |
| 81 | 1 | 0 | -0.624910 | -3.438579 | 0.479011  |
| 82 | 1 | 0 | -2.086518 | -4.386419 | 0.143787  |

|     |   |   |           |           |           |
|-----|---|---|-----------|-----------|-----------|
| 83  | 6 | 0 | -1.904370 | -2.570897 | -1.038973 |
| 84  | 1 | 0 | -2.671790 | -2.913197 | -1.740099 |
| 85  | 6 | 0 | -2.519233 | -1.494030 | -0.145561 |
| 86  | 6 | 0 | -4.565278 | -0.734409 | 0.857406  |
| 87  | 6 | 0 | -5.118709 | 0.426136  | 0.256028  |
| 88  | 6 | 0 | -5.772854 | 1.367933  | 1.070566  |
| 89  | 1 | 0 | -6.183983 | 2.274718  | 0.647054  |
| 90  | 6 | 0 | -5.901059 | 1.157715  | 2.440125  |
| 91  | 1 | 0 | -6.409153 | 1.891847  | 3.052386  |
| 92  | 6 | 0 | -5.376833 | 0.010056  | 3.027111  |
| 93  | 1 | 0 | -5.491288 | -0.121516 | 4.094938  |
| 94  | 6 | 0 | -4.702850 | -0.951380 | 2.252407  |
| 95  | 6 | 0 | -4.120996 | -2.190169 | 2.925631  |
| 96  | 1 | 0 | -3.646842 | -2.856819 | 2.175553  |
| 97  | 6 | 0 | -5.216385 | -3.021478 | 3.603672  |
| 98  | 1 | 0 | -4.788610 | -3.969208 | 3.995330  |
| 99  | 1 | 0 | -6.008213 | -3.280730 | 2.868462  |
| 100 | 1 | 0 | -5.678994 | -2.472643 | 4.450835  |
| 101 | 6 | 0 | -3.021778 | -1.808407 | 3.923285  |
| 102 | 1 | 0 | -2.237763 | -1.206910 | 3.415005  |
| 103 | 1 | 0 | -2.541435 | -2.723520 | 4.331291  |
| 104 | 1 | 0 | -3.430715 | -1.219633 | 4.771545  |
| 105 | 6 | 0 | -4.988949 | 0.684660  | -1.242165 |
| 106 | 1 | 0 | -4.521290 | -0.184471 | -1.749616 |
| 107 | 6 | 0 | -6.359513 | 0.873987  | -1.904413 |
| 108 | 1 | 0 | -7.018915 | 0.010133  | -1.673637 |
| 109 | 1 | 0 | -6.243652 | 0.931175  | -3.007971 |
| 110 | 1 | 0 | -6.855136 | 1.805924  | -1.560313 |
| 111 | 6 | 0 | -4.077122 | 1.886304  | -1.508364 |
| 112 | 1 | 0 | -4.509853 | 2.820981  | -1.093195 |
| 113 | 1 | 0 | -3.928759 | 2.021074  | -2.601023 |
| 114 | 1 | 0 | -3.084426 | 1.712039  | -1.043505 |
| 115 | 1 | 0 | -1.207265 | 1.494922  | -2.922905 |
| 116 | 1 | 0 | -1.015084 | 1.425466  | -4.665538 |
| 117 | 6 | 0 | 0.693334  | 2.207883  | -3.633208 |
| 118 | 1 | 0 | 1.402455  | 1.979332  | -4.440592 |
| 119 | 1 | 0 | 0.341837  | 3.227215  | -3.828303 |
| 120 | 6 | 0 | -0.129699 | -0.259898 | -3.609817 |
| 121 | 1 | 0 | 0.764860  | -0.375731 | -2.995125 |
| 122 | 1 | 0 | 0.112905  | -0.664475 | -4.597771 |

---

### L5-Mg(II)-COM

Zero-point correction= 1.20620 a.u.

Thermal correction to Gibbs Free Energy= 1.10988 a.u.

Sum of electronic and zero-point Energies= -5601.46167 a.u.

Sum of electronic and thermal Free Energies= -5601.55799 a.u.

The number of imaginary frequencies 0

Standard orientation

---

| Center<br>Number | Atomic<br>Number | Atomic<br>Type | Coordinates (Angstroms) |           |           |
|------------------|------------------|----------------|-------------------------|-----------|-----------|
|                  |                  |                | X                       | Y         | Z         |
| 1                | 6                | 0              | -0.326518               | 1.475459  | -1.862599 |
| 2                | 6                | 0              | 0.102879                | 2.161875  | -0.557829 |
| 3                | 6                | 0              | 0.177582                | 3.572675  | -0.862976 |
| 4                | 6                | 0              | -0.164695               | 3.700142  | -2.234107 |
| 5                | 7                | 0              | -0.458783               | 2.429882  | -2.803383 |
| 6                | 8                | 0              | 0.304075                | 1.481833  | 0.441071  |
| 7                | 6                | 0              | 0.495109                | 4.710090  | -0.119157 |
| 8                | 6                | 0              | -0.189618               | 4.927898  | -2.864705 |
| 9                | 8                | 0              | -0.493001               | 0.255278  | -1.929073 |
| 10               | 6                | 0              | -0.872574               | 2.214436  | -4.184192 |
| 11               | 1                | 0              | -1.806152               | 2.748893  | -4.382296 |
| 12               | 1                | 0              | -0.094441               | 2.565919  | -4.867487 |
| 13               | 1                | 0              | -1.028219               | 1.144631  | -4.326931 |
| 14               | 6                | 0              | 0.474050                | 5.961371  | -0.734365 |
| 15               | 6                | 0              | 0.136008                | 6.052717  | -2.087689 |
| 16               | 35               | 0              | 0.946384                | 4.554561  | 1.715212  |
| 17               | 1                | 0              | 0.716535                | 6.855888  | -0.172462 |
| 18               | 1                | 0              | 0.124469                | 7.032747  | -2.554955 |
| 19               | 1                | 0              | -0.449425               | 5.030178  | -3.912169 |
| 20               | 8                | 0              | 1.925982                | -0.782992 | -0.469703 |
| 21               | 12               | 0              | -0.072799               | -0.781543 | 0.029152  |
| 22               | 8                | 0              | -0.181123               | -2.611159 | -0.821847 |
| 23               | 8                | 0              | 0.109105                | -0.998602 | 2.024122  |
| 24               | 8                | 0              | -2.071413               | -0.381511 | 0.399127  |
| 25               | 7                | 0              | 3.892564                | -1.452095 | -1.384146 |
| 26               | 1                | 0              | 4.392987                | -2.142449 | -1.932500 |
| 27               | 7                | 0              | 0.817361                | -3.449112 | -1.271366 |
| 28               | 7                | 0              | -3.981359               | 0.120009  | 1.516864  |
| 29               | 1                | 0              | -4.441335               | 0.265132  | 2.408429  |
| 30               | 7                | 0              | -0.885054               | -1.296951 | 2.929143  |
| 31               | 6                | 0              | 4.656843                | -0.491458 | -0.682338 |
| 32               | 6                | 0              | 5.165596                | -0.801092 | 0.605393  |
| 33               | 6                | 0              | 5.833651                | 0.201242  | 1.331770  |
| 34               | 1                | 0              | 6.205377                | 0.007283  | 2.329139  |
| 35               | 6                | 0              | 6.030227                | 1.465486  | 0.784607  |

|    |   |   |           |           |           |
|----|---|---|-----------|-----------|-----------|
| 36 | 1 | 0 | 6.550025  | 2.224314  | 1.355505  |
| 37 | 6 | 0 | 5.567117  | 1.757146  | -0.494943 |
| 38 | 1 | 0 | 5.743546  | 2.747153  | -0.894657 |
| 39 | 6 | 0 | 4.876323  | 0.790667  | -1.248410 |
| 40 | 6 | 0 | 4.378114  | 1.140417  | -2.647227 |
| 41 | 1 | 0 | 3.860147  | 0.272291  | -3.105986 |
| 42 | 6 | 0 | 3.355764  | 2.280141  | -2.598681 |
| 43 | 1 | 0 | 2.551882  | 2.026182  | -1.880757 |
| 44 | 1 | 0 | 2.895964  | 2.426724  | -3.599454 |
| 45 | 1 | 0 | 3.824250  | 3.236163  | -2.282648 |
| 46 | 6 | 0 | 5.543668  | 1.488101  | -3.580044 |
| 47 | 1 | 0 | 5.170224  | 1.648217  | -4.614344 |
| 48 | 1 | 0 | 6.275448  | 0.652312  | -3.604907 |
| 49 | 1 | 0 | 6.066085  | 2.411313  | -3.251708 |
| 50 | 6 | 0 | 4.980780  | -2.185176 | 1.220418  |
| 51 | 1 | 0 | 4.529093  | -2.883195 | 0.485130  |
| 52 | 6 | 0 | 6.321920  | -2.810733 | 1.623070  |
| 53 | 1 | 0 | 7.017250  | -2.814274 | 0.756390  |
| 54 | 1 | 0 | 6.169127  | -3.863500 | 1.944301  |
| 55 | 1 | 0 | 6.795716  | -2.259514 | 2.462302  |
| 56 | 6 | 0 | 4.019412  | -2.124456 | 2.409115  |
| 57 | 1 | 0 | 4.434131  | -1.504510 | 3.231937  |
| 58 | 1 | 0 | 3.823416  | -3.146272 | 2.798724  |
| 59 | 1 | 0 | 3.053091  | -1.687658 | 2.081212  |
| 60 | 6 | 0 | 2.564916  | -1.563447 | -1.201458 |
| 61 | 6 | 0 | 1.926133  | -2.685284 | -2.009122 |
| 62 | 1 | 0 | 2.692792  | -3.432596 | -2.228623 |
| 63 | 6 | 0 | 1.254856  | -2.283467 | -3.320013 |
| 64 | 1 | 0 | 1.993082  | -1.930951 | -4.044837 |
| 65 | 1 | 0 | 0.523797  | -1.491663 | -3.146518 |
| 66 | 6 | 0 | 0.584087  | -3.604138 | -3.749760 |
| 67 | 1 | 0 | 1.294887  | -4.178243 | -4.351081 |
| 68 | 6 | 0 | -0.774664 | -3.459260 | -4.470945 |
| 69 | 1 | 0 | -0.840325 | -2.524734 | -5.039254 |
| 70 | 1 | 0 | -0.900150 | -4.283892 | -5.182844 |
| 71 | 6 | 0 | -1.827512 | -3.565078 | -3.353800 |
| 72 | 1 | 0 | -2.814318 | -3.856778 | -3.728598 |
| 73 | 1 | 0 | -1.930484 | -2.604982 | -2.839342 |
| 74 | 6 | 0 | -1.230393 | -4.608283 | -2.393090 |
| 75 | 1 | 0 | -1.650733 | -4.573620 | -1.389026 |
| 76 | 1 | 0 | -1.398537 | -5.617317 | -2.790300 |
| 77 | 6 | 0 | 0.283786  | -4.367326 | -2.421964 |
| 78 | 1 | 0 | 0.862658  | -5.286854 | -2.330811 |
| 79 | 6 | 0 | 1.426532  | -4.242471 | -0.120467 |

|     |   |   |           |           |           |
|-----|---|---|-----------|-----------|-----------|
| 80  | 1 | 0 | 2.292119  | -4.764280 | -0.538794 |
| 81  | 1 | 0 | 1.785864  | -3.483790 | 0.576400  |
| 82  | 6 | 0 | -0.679739 | -4.742813 | 1.374121  |
| 83  | 6 | 0 | -1.424342 | -2.709695 | 2.710965  |
| 84  | 1 | 0 | -2.030381 | -2.632600 | 1.807204  |
| 85  | 1 | 0 | -2.087162 | -2.928898 | 3.551151  |
| 86  | 6 | 0 | -0.373878 | -1.044933 | 4.378909  |
| 87  | 1 | 0 | -0.985149 | -1.696448 | 5.004610  |
| 88  | 6 | 0 | 1.127643  | -1.265125 | 4.576957  |
| 89  | 1 | 0 | 1.529810  | -2.062131 | 3.951875  |
| 90  | 1 | 0 | 1.262715  | -1.569433 | 5.622653  |
| 91  | 6 | 0 | 1.776983  | 0.111314  | 4.348377  |
| 92  | 1 | 0 | 1.911539  | 0.282259  | 3.277413  |
| 93  | 1 | 0 | 2.755134  | 0.196620  | 4.834024  |
| 94  | 6 | 0 | 0.746583  | 1.103520  | 4.922515  |
| 95  | 1 | 0 | 0.832620  | 2.103579  | 4.484110  |
| 96  | 1 | 0 | 0.890268  | 1.209923  | 6.004127  |
| 97  | 6 | 0 | -0.639692 | 0.468369  | 4.649022  |
| 98  | 1 | 0 | -1.291949 | 0.569053  | 5.521021  |
| 99  | 6 | 0 | -1.396405 | 0.988980  | 3.404783  |
| 100 | 1 | 0 | -0.717747 | 1.425856  | 2.670135  |
| 101 | 1 | 0 | -2.163650 | 1.724440  | 3.658287  |
| 102 | 6 | 0 | -2.027831 | -0.289265 | 2.849932  |
| 103 | 1 | 0 | -2.784683 | -0.650415 | 3.553372  |
| 104 | 6 | 0 | -2.675946 | -0.194474 | 1.472795  |
| 105 | 6 | 0 | -4.761147 | 0.238592  | 0.342987  |
| 106 | 6 | 0 | -5.289857 | -0.925163 | -0.275039 |
| 107 | 6 | 0 | -6.006438 | -0.790501 | -1.477852 |
| 108 | 1 | 0 | -6.401042 | -1.659896 | -1.986826 |
| 109 | 6 | 0 | -6.233770 | 0.464221  | -2.034677 |
| 110 | 1 | 0 | -6.795537 | 0.550929  | -2.955940 |
| 111 | 6 | 0 | -5.749544 | 1.608556  | -1.408713 |
| 112 | 1 | 0 | -5.950407 | 2.569585  | -1.863527 |
| 113 | 6 | 0 | -5.004911 | 1.518470  | -0.218576 |
| 114 | 6 | 0 | -4.465973 | 2.789972  | 0.429282  |
| 115 | 1 | 0 | -3.872982 | 2.546463  | 1.335440  |
| 116 | 6 | 0 | -5.608494 | 3.701479  | 0.889801  |
| 117 | 1 | 0 | -5.199901 | 4.581320  | 1.431565  |
| 118 | 1 | 0 | -6.279024 | 3.151539  | 1.584399  |
| 119 | 1 | 0 | -6.207152 | 4.068070  | 0.029183  |
| 120 | 6 | 0 | -3.520207 | 3.534957  | -0.519191 |
| 121 | 1 | 0 | -2.748729 | 2.837197  | -0.900690 |
| 122 | 1 | 0 | -3.008905 | 4.361382  | 0.019392  |
| 123 | 1 | 0 | -4.065910 | 3.965777  | -1.384966 |

|     |   |   |           |           |           |
|-----|---|---|-----------|-----------|-----------|
| 124 | 6 | 0 | -5.101351 | -2.309502 | 0.339120  |
| 125 | 1 | 0 | -4.591679 | -2.235474 | 1.321821  |
| 126 | 6 | 0 | -6.447842 | -2.990706 | 0.614631  |
| 127 | 1 | 0 | -7.091300 | -2.329309 | 1.233894  |
| 128 | 1 | 0 | -6.288690 | -3.936594 | 1.175682  |
| 129 | 1 | 0 | -6.983750 | -3.233525 | -0.327036 |
| 130 | 6 | 0 | -4.213113 | -3.185054 | -0.549382 |
| 131 | 1 | 0 | -4.688051 | -3.373145 | -1.535347 |
| 132 | 1 | 0 | -4.022710 | -4.162361 | -0.056658 |
| 133 | 1 | 0 | -3.236937 | -2.682963 | -0.711298 |
| 134 | 1 | 0 | -1.363059 | -4.256220 | 0.674913  |
| 135 | 1 | 0 | -1.213317 | -5.608417 | 1.785780  |
| 136 | 6 | 0 | 0.530392  | -5.265490 | 0.583934  |
| 137 | 1 | 0 | 1.209706  | -5.794459 | 1.266932  |
| 138 | 1 | 0 | 0.192132  | -6.017934 | -0.138110 |
| 139 | 6 | 0 | -0.323800 | -3.753281 | 2.504933  |
| 140 | 1 | 0 | 0.583578  | -3.208647 | 2.240800  |
| 141 | 1 | 0 | -0.119667 | -4.289159 | 3.438072  |

---

### L3b-Mg(II)

Zero-point correction= 0.88856 a.u.

Thermal correction to Gibbs Free Energy= 0.81418 a.u.

Sum of electronic and zero-point Energies= -2163.37597 a.u.

Sum of electronic and thermal Free Energies= -2163.45035 a.u.

The number of imaginary frequencies        0

Standard orientation

---

| Center<br>Number | Atomic<br>Number | Atomic<br>Type | Coordinates (Angstroms) |           |           |
|------------------|------------------|----------------|-------------------------|-----------|-----------|
|                  |                  |                | X                       | Y         | Z         |
| 1                | 8                | 0              | 1.940466                | 0.227075  | 0.406001  |
| 2                | 12               | 0              | -0.013367               | 0.054987  | 0.005963  |
| 3                | 8                | 0              | 0.030360                | 1.711499  | -1.042197 |
| 4                | 8                | 0              | -0.028515               | -1.341730 | -1.375132 |
| 5                | 8                | 0              | -1.972634               | -0.225831 | 0.305693  |
| 6                | 7                | 0              | 4.091400                | 0.698149  | -0.131044 |
| 7                | 1                | 0              | 4.741102                | 1.316160  | -0.607130 |
| 8                | 7                | 0              | 1.113031                | 1.923618  | -1.889666 |
| 9                | 7                | 0              | -4.110107               | -0.705900 | -0.265307 |
| 10               | 1                | 0              | -4.746660               | -1.238384 | -0.850002 |
| 11               | 7                | 0              | -1.088293               | -1.361314 | -2.276610 |
| 12               | 6                | 0              | 4.628648                | -0.271571 | 0.749439  |
| 13               | 6                | 0              | 4.633927                | -1.643317 | 0.379306  |

|    |   |   |           |           |           |
|----|---|---|-----------|-----------|-----------|
| 14 | 6 | 0 | 5.142478  | -2.590781 | 1.286224  |
| 15 | 1 | 0 | 5.152837  | -3.643846 | 1.037968  |
| 16 | 6 | 0 | 5.647597  | -2.195906 | 2.520759  |
| 17 | 1 | 0 | 6.036218  | -2.938290 | 3.206118  |
| 18 | 6 | 0 | 5.658436  | -0.851481 | 2.877769  |
| 19 | 1 | 0 | 6.058084  | -0.578450 | 3.845401  |
| 20 | 6 | 0 | 5.155584  | 0.130245  | 2.004815  |
| 21 | 6 | 0 | 5.167396  | 1.594368  | 2.434198  |
| 22 | 1 | 0 | 4.751855  | 2.241814  | 1.634992  |
| 23 | 6 | 0 | 4.283740  | 1.814832  | 3.667472  |
| 24 | 1 | 0 | 3.252279  | 1.452734  | 3.467912  |
| 25 | 1 | 0 | 4.225802  | 2.898516  | 3.906555  |
| 26 | 1 | 0 | 4.685056  | 1.281690  | 4.555120  |
| 27 | 6 | 0 | 6.597380  | 2.086890  | 2.686635  |
| 28 | 1 | 0 | 6.594625  | 3.179241  | 2.889406  |
| 29 | 1 | 0 | 7.226828  | 1.906740  | 1.788797  |
| 30 | 1 | 0 | 7.057745  | 1.572467  | 3.556482  |
| 31 | 6 | 0 | 4.113152  | -2.108935 | -0.977619 |
| 32 | 1 | 0 | 3.773971  | -1.245167 | -1.585116 |
| 33 | 6 | 0 | 5.218179  | -2.790967 | -1.793400 |
| 34 | 1 | 0 | 6.091817  | -2.112058 | -1.895644 |
| 35 | 1 | 0 | 4.847433  | -3.028615 | -2.813704 |
| 36 | 1 | 0 | 5.552830  | -3.736162 | -1.316328 |
| 37 | 6 | 0 | 2.901155  | -3.033919 | -0.816879 |
| 38 | 1 | 0 | 3.185278  | -3.993502 | -0.335688 |
| 39 | 1 | 0 | 2.460567  | -3.258515 | -1.811700 |
| 40 | 1 | 0 | 2.123556  | -2.543151 | -0.194372 |
| 41 | 6 | 0 | 2.776381  | 0.926825  | -0.212395 |
| 42 | 6 | 0 | 2.402258  | 2.116346  | -1.092357 |
| 43 | 1 | 0 | 3.182352  | 2.255518  | -1.844103 |
| 44 | 6 | 0 | 2.156706  | 3.438452  | -0.343475 |
| 45 | 1 | 0 | 3.111156  | 3.929739  | -0.144068 |
| 46 | 1 | 0 | 1.659957  | 3.252662  | 0.610462  |
| 47 | 6 | 0 | 1.245943  | 4.252237  | -1.306659 |
| 48 | 1 | 0 | 1.746963  | 5.149972  | -1.675622 |
| 49 | 6 | 0 | 0.931687  | 3.310391  | -2.477958 |
| 50 | 1 | 0 | 1.643551  | 3.412158  | -3.299690 |
| 51 | 6 | 0 | 1.269626  | 0.819359  | -2.921353 |
| 52 | 1 | 0 | 2.056491  | 1.158438  | -3.600883 |
| 53 | 1 | 0 | 1.622363  | -0.058064 | -2.383066 |
| 54 | 6 | 0 | 0.016753  | 0.472328  | -3.731180 |
| 55 | 1 | 0 | 0.350761  | -0.258026 | -4.477073 |
| 56 | 1 | 0 | -0.312292 | 1.350805  | -4.298186 |
| 57 | 6 | 0 | -1.240783 | -0.049915 | -3.028290 |

|     |   |   |           |           |           |
|-----|---|---|-----------|-----------|-----------|
| 58  | 1 | 0 | -1.598282 | 0.681251  | -2.307355 |
| 59  | 1 | 0 | -2.022636 | -0.224214 | -3.772247 |
| 60  | 6 | 0 | -0.867440 | -2.565646 | -3.174256 |
| 61  | 1 | 0 | -1.568582 | -2.483433 | -4.008098 |
| 62  | 6 | 0 | -1.175836 | -3.762519 | -2.264878 |
| 63  | 1 | 0 | -1.639454 | -4.562115 | -2.846977 |
| 64  | 6 | 0 | -2.132607 | -3.220450 | -1.165110 |
| 65  | 1 | 0 | -1.669985 | -3.270172 | -0.177549 |
| 66  | 1 | 0 | -3.081133 | -3.759744 | -1.126255 |
| 67  | 6 | 0 | -2.386089 | -1.755594 | -1.573826 |
| 68  | 1 | 0 | -3.157911 | -1.713286 | -2.346100 |
| 69  | 6 | 0 | -2.788862 | -0.823652 | -0.433618 |
| 70  | 6 | 0 | -4.660013 | 0.030535  | 0.811237  |
| 71  | 6 | 0 | -4.756268 | 1.445719  | 0.727936  |
| 72  | 6 | 0 | -5.270109 | 2.158482  | 1.826421  |
| 73  | 1 | 0 | -5.349775 | 3.237107  | 1.797311  |
| 74  | 6 | 0 | -5.687951 | 1.494133  | 2.974815  |
| 75  | 1 | 0 | -6.081839 | 2.058303  | 3.810525  |
| 76  | 6 | 0 | -5.602297 | 0.107943  | 3.054602  |
| 77  | 1 | 0 | -5.932073 | -0.376859 | 3.964126  |
| 78  | 6 | 0 | -5.088431 | -0.645521 | 1.983502  |
| 79  | 6 | 0 | -4.975963 | -2.161216 | 2.117319  |
| 80  | 1 | 0 | -4.561865 | -2.609353 | 1.190475  |
| 81  | 6 | 0 | -6.351785 | -2.804042 | 2.327758  |
| 82  | 1 | 0 | -6.259559 | -3.911334 | 2.326687  |
| 83  | 1 | 0 | -7.037865 | -2.516287 | 1.502439  |
| 84  | 1 | 0 | -6.802998 | -2.494163 | 3.293839  |
| 85  | 6 | 0 | -4.012245 | -2.543953 | 3.246562  |
| 86  | 1 | 0 | -3.018580 | -2.076908 | 3.074664  |
| 87  | 1 | 0 | -3.872779 | -3.645984 | 3.272766  |
| 88  | 1 | 0 | -4.395562 | -2.217124 | 4.236348  |
| 89  | 6 | 0 | -4.320480 | 2.205823  | -0.521759 |
| 90  | 1 | 0 | -3.974009 | 1.503103  | -1.307065 |
| 91  | 6 | 0 | -5.490329 | 2.982432  | -1.138255 |
| 92  | 1 | 0 | -6.336847 | 2.294397  | -1.349332 |
| 93  | 1 | 0 | -5.176849 | 3.444407  | -2.099021 |
| 94  | 1 | 0 | -5.844718 | 3.790379  | -0.463920 |
| 95  | 6 | 0 | -3.141613 | 3.138369  | -0.216833 |
| 96  | 1 | 0 | -3.442001 | 3.959153  | 0.468445  |
| 97  | 1 | 0 | -2.758287 | 3.589533  | -1.156985 |
| 98  | 1 | 0 | -2.313106 | 2.568673  | 0.254832  |
| 99  | 1 | 0 | 0.156278  | -2.513459 | -3.539497 |
| 100 | 1 | 0 | -0.262446 | -4.154230 | -1.814559 |
| 101 | 1 | 0 | -0.087399 | 3.370958  | -2.855511 |



102            1            0            0.330967    4.557215    -0.796896

---

### L3b-Mg(II)-COM

Zero-point correction= 1.02277 a.u.

Thermal correction to Gibbs Free Energy= 0.93509 a.u.

Sum of electronic and zero-point Energies= -5289.42058 a.u.

Sum of electronic and thermal Free Energies= -5289.50826 a.u.

The number of imaginary frequencies        0

Standard orientation

---

| Center<br>Number | Atomic<br>Number | Atomic<br>Type | Coordinates (Angstroms) |           |           |
|------------------|------------------|----------------|-------------------------|-----------|-----------|
|                  |                  |                | X                       | Y         | Z         |
| 1                | 6                | 0              | 0.170404                | 1.058966  | -1.648957 |
| 2                | 6                | 0              | 0.459181                | 1.585394  | -0.235301 |
| 3                | 6                | 0              | 1.025645                | 2.900131  | -0.416713 |
| 4                | 6                | 0              | 1.038497                | 3.137745  | -1.815530 |
| 5                | 7                | 0              | 0.505284                | 2.025677  | -2.523568 |
| 6                | 8                | 0              | 0.191681                | 0.884581  | 0.735041  |
| 7                | 6                | 0              | 1.520323                | 3.870819  | 0.456165  |
| 8                | 6                | 0              | 1.534682                | 4.309938  | -2.348664 |
| 9                | 8                | 0              | -0.274928               | -0.076174 | -1.840338 |
| 10               | 6                | 0              | 0.362253                | 1.954282  | -3.972835 |
| 11               | 1                | 0              | 1.330691                | 2.117105  | -4.453547 |
| 12               | 1                | 0              | -0.010800               | 0.961673  | -4.227023 |
| 13               | 1                | 0              | -0.348893               | 2.711553  | -4.315102 |
| 14               | 6                | 0              | 2.029190                | 5.062445  | -0.059592 |
| 15               | 6                | 0              | 2.029092                | 5.265007  | -1.442830 |
| 16               | 35               | 0              | 1.506951                | 3.564345  | 2.323370  |
| 17               | 1                | 0              | 2.420471                | 5.825222  | 0.603666  |
| 18               | 1                | 0              | 2.427001                | 6.197532  | -1.831316 |
| 19               | 1                | 0              | 1.546208                | 4.495598  | -3.416596 |
| 20               | 8                | 0              | 1.632816                | -1.419345 | 0.075340  |
| 21               | 12               | 0              | -0.403332               | -1.200049 | 0.054369  |
| 22               | 8                | 0              | -0.420953               | -2.996636 | -0.859976 |
| 23               | 8                | 0              | -0.731953               | -1.749987 | 1.964686  |
| 24               | 8                | 0              | -2.397179               | -0.729029 | 0.010858  |
| 25               | 7                | 0              | 3.726332                | -2.169741 | -0.318603 |
| 26               | 1                | 0              | 4.318954                | -2.899258 | -0.701102 |
| 27               | 7                | 0              | 0.458751                | -3.997865 | -0.468492 |
| 28               | 7                | 0              | -4.455194               | -0.140600 | 0.747592  |
| 29               | 1                | 0              | -5.112578               | -0.124263 | 1.520313  |
| 30               | 7                | 0              | -1.909763               | -2.396883 | 2.313008  |

|    |   |   |           |           |           |
|----|---|---|-----------|-----------|-----------|
| 31 | 6 | 0 | 4.292530  | -0.888806 | -0.104461 |
| 32 | 6 | 0 | 4.397991  | -0.370125 | 1.214744  |
| 33 | 6 | 0 | 4.846587  | 0.950929  | 1.393429  |
| 34 | 1 | 0 | 4.929484  | 1.377632  | 2.384255  |
| 35 | 6 | 0 | 5.185638  | 1.742466  | 0.301651  |
| 36 | 1 | 0 | 5.518647  | 2.760785  | 0.457089  |
| 37 | 6 | 0 | 5.102748  | 1.230840  | -0.988836 |
| 38 | 1 | 0 | 5.372489  | 1.874883  | -1.815273 |
| 39 | 6 | 0 | 4.668540  | -0.088188 | -1.215967 |
| 40 | 6 | 0 | 4.572371  | -0.608612 | -2.647337 |
| 41 | 1 | 0 | 4.265262  | -1.673850 | -2.661099 |
| 42 | 6 | 0 | 3.505110  | 0.155706  | -3.435798 |
| 43 | 1 | 0 | 2.525383  | 0.055241  | -2.926596 |
| 44 | 1 | 0 | 3.403294  | -0.267780 | -4.457838 |
| 45 | 1 | 0 | 3.760056  | 1.232793  | -3.524124 |
| 46 | 6 | 0 | 5.930300  | -0.548334 | -3.357511 |
| 47 | 1 | 0 | 5.863204  | -1.041491 | -4.351133 |
| 48 | 1 | 0 | 6.698188  | -1.084652 | -2.759804 |
| 49 | 1 | 0 | 6.263388  | 0.499302  | -3.513187 |
| 50 | 6 | 0 | 4.041212  | -1.211852 | 2.436688  |
| 51 | 1 | 0 | 3.712322  | -2.226735 | 2.130514  |
| 52 | 6 | 0 | 5.262252  | -1.415219 | 3.341346  |
| 53 | 1 | 0 | 6.098338  | -1.859875 | 2.760083  |
| 54 | 1 | 0 | 5.011059  | -2.112227 | 4.169566  |
| 55 | 1 | 0 | 5.604781  | -0.456273 | 3.784508  |
| 56 | 6 | 0 | 2.877847  | -0.591185 | 3.221091  |
| 57 | 1 | 0 | 3.166992  | 0.379620  | 3.675870  |
| 58 | 1 | 0 | 2.557998  | -1.276112 | 4.035370  |
| 59 | 1 | 0 | 2.006598  | -0.424536 | 2.553773  |
| 60 | 6 | 0 | 2.388928  | -2.323057 | -0.322039 |
| 61 | 6 | 0 | 1.897644  | -3.657692 | -0.862046 |
| 62 | 1 | 0 | 2.520440  | -4.457349 | -0.448682 |
| 63 | 6 | 0 | 1.875249  | -3.740546 | -2.402363 |
| 64 | 1 | 0 | 2.861917  | -4.028575 | -2.771207 |
| 65 | 1 | 0 | 1.618127  | -2.771075 | -2.833080 |
| 66 | 6 | 0 | 0.782436  | -4.796919 | -2.718263 |
| 67 | 1 | 0 | 1.197500  | -5.675674 | -3.217542 |
| 68 | 6 | 0 | 0.191142  | -5.196117 | -1.361349 |
| 69 | 1 | 0 | 0.706608  | -6.053121 | -0.920450 |
| 70 | 6 | 0 | 0.356241  | -4.319738 | 1.009610  |
| 71 | 1 | 0 | 1.024879  | -5.168783 | 1.174486  |
| 72 | 1 | 0 | 0.736981  | -3.451250 | 1.541827  |
| 73 | 6 | 0 | -1.046049 | -4.684710 | 1.505258  |
| 74 | 1 | 0 | -0.908342 | -5.053219 | 2.528330  |

|     |   |   |           |           |           |
|-----|---|---|-----------|-----------|-----------|
| 75  | 1 | 0 | -1.431803 | -5.538263 | 0.935813  |
| 76  | 6 | 0 | -2.162324 | -3.636671 | 1.479507  |
| 77  | 1 | 0 | -2.343645 | -3.293663 | 0.463702  |
| 78  | 1 | 0 | -3.078452 | -4.082611 | 1.875941  |
| 79  | 6 | 0 | -1.838143 | -2.680752 | 3.802508  |
| 80  | 1 | 0 | -2.655214 | -3.365876 | 4.045366  |
| 81  | 6 | 0 | -2.019802 | -1.305995 | 4.454015  |
| 82  | 1 | 0 | -2.552457 | -1.407616 | 5.402452  |
| 83  | 6 | 0 | -2.821082 | -0.463105 | 3.425116  |
| 84  | 1 | 0 | -2.238404 | 0.394740  | 3.084585  |
| 85  | 1 | 0 | -3.769195 | -0.097505 | 3.824708  |
| 86  | 6 | 0 | -3.089757 | -1.432587 | 2.252549  |
| 87  | 1 | 0 | -3.982004 | -2.033689 | 2.454906  |
| 88  | 6 | 0 | -3.265000 | -0.746962 | 0.903045  |
| 89  | 6 | 0 | -4.685726 | 0.738907  | -0.337778 |
| 90  | 6 | 0 | -5.024838 | 0.217348  | -1.615043 |
| 91  | 6 | 0 | -5.185702 | 1.106852  | -2.692799 |
| 92  | 1 | 0 | -5.439299 | 0.740654  | -3.678963 |
| 93  | 6 | 0 | -5.021813 | 2.476795  | -2.517114 |
| 94  | 1 | 0 | -5.146394 | 3.146589  | -3.358367 |
| 95  | 6 | 0 | -4.698146 | 2.990535  | -1.265788 |
| 96  | 1 | 0 | -4.573413 | 4.060553  | -1.165108 |
| 97  | 6 | 0 | -4.527580 | 2.139404  | -0.158911 |
| 98  | 6 | 0 | -4.147979 | 2.736612  | 1.193323  |
| 99  | 1 | 0 | -4.066405 | 1.944220  | 1.964141  |
| 100 | 6 | 0 | -5.221960 | 3.710011  | 1.693239  |
| 101 | 1 | 0 | -4.981248 | 4.045694  | 2.724808  |
| 102 | 1 | 0 | -6.212269 | 3.206619  | 1.718960  |
| 103 | 1 | 0 | -5.292238 | 4.607307  | 1.043221  |
| 104 | 6 | 0 | -2.775829 | 3.417262  | 1.130559  |
| 105 | 1 | 0 | -2.012014 | 2.697659  | 0.769848  |
| 106 | 1 | 0 | -2.471373 | 3.759539  | 2.142765  |
| 107 | 1 | 0 | -2.787701 | 4.296076  | 0.451708  |
| 108 | 6 | 0 | -5.221114 | -1.279042 | -1.842261 |
| 109 | 1 | 0 | -5.074372 | -1.841851 | -0.897310 |
| 110 | 6 | 0 | -6.650896 | -1.587232 | -2.303197 |
| 111 | 1 | 0 | -7.384006 | -1.177874 | -1.575494 |
| 112 | 1 | 0 | -6.803247 | -2.686383 | -2.362788 |
| 113 | 1 | 0 | -6.858748 | -1.152435 | -3.303750 |
| 114 | 6 | 0 | -4.193652 | -1.827545 | -2.840019 |
| 115 | 1 | 0 | -4.347046 | -1.402693 | -3.854620 |
| 116 | 1 | 0 | -4.280402 | -2.933275 | -2.907905 |
| 117 | 1 | 0 | -3.162893 | -1.585978 | -2.504446 |
| 118 | 1 | 0 | -0.878229 | -3.155757 | 3.995070  |

|     |   |   |           |           |           |
|-----|---|---|-----------|-----------|-----------|
| 119 | 1 | 0 | -1.052598 | -0.842376 | 4.653658  |
| 120 | 1 | 0 | -0.883934 | -5.362653 | -1.364159 |
| 121 | 1 | 0 | 0.015481  | -4.369286 | -3.365756 |

---

### L3c-Mg(II)

Zero-point correction= 0.94536 a.u.

Thermal correction to Gibbs Free Energy= 0.86128 a.u.

Sum of electronic and zero-point Energies= -2241.99392 a.u.

Sum of electronic and thermal Free Energies= -2242.07800a.u.

The number of imaginary frequencies        0

Standard orientation

---

| Center<br>Number | Atomic<br>Number | Atomic<br>Type | Coordinates (Angstroms) |           |           |
|------------------|------------------|----------------|-------------------------|-----------|-----------|
|                  |                  |                | X                       | Y         | Z         |
| 1                | 8                | 0              | -1.975591               | -0.264114 | 0.524810  |
| 2                | 12               | 0              | 0.003882                | 0.009437  | 0.289334  |
| 3                | 8                | 0              | 0.114445                | -1.550108 | -0.902499 |
| 4                | 8                | 0              | -0.099186               | 1.589299  | -0.876619 |
| 5                | 8                | 0              | 1.975079                | 0.310964  | 0.573684  |
| 6                | 7                | 0              | -4.059359               | -0.896980 | -0.108226 |
| 7                | 1                | 0              | -4.639157               | -1.521414 | -0.659144 |
| 8                | 7                | 0              | -0.932854               | -1.771804 | -1.788565 |
| 9                | 7                | 0              | 4.062083                | 0.856597  | -0.125175 |
| 10               | 1                | 0              | 4.649979                | 1.438617  | -0.712872 |
| 11               | 7                | 0              | 0.944255                | 1.824079  | -1.762585 |
| 12               | 6                | 0              | -4.708850               | 0.051735  | 0.716564  |
| 13               | 6                | 0              | -4.911533               | 1.376061  | 0.246691  |
| 14               | 6                | 0              | -5.518141               | 2.315705  | 1.099557  |
| 15               | 1                | 0              | -5.674641               | 3.336125  | 0.775348  |
| 16               | 6                | 0              | -5.928954               | 1.955541  | 2.379082  |
| 17               | 1                | 0              | -6.393521               | 2.691493  | 3.022693  |
| 18               | 6                | 0              | -5.748733               | 0.653036  | 2.833772  |
| 19               | 1                | 0              | -6.080552               | 0.405469  | 3.833453  |
| 20               | 6                | 0              | -5.145621               | -0.319264 | 2.015096  |
| 21               | 6                | 0              | -4.964350               | -1.738753 | 2.542463  |
| 22               | 1                | 0              | -4.506391               | -2.387850 | 1.768602  |
| 23               | 6                | 0              | -4.015560               | -1.761631 | 3.745800  |
| 24               | 1                | 0              | -3.044339               | -1.294764 | 3.474281  |
| 25               | 1                | 0              | -3.817080               | -2.809922 | 4.056142  |
| 26               | 1                | 0              | -4.445857               | -1.215074 | 4.611366  |
| 27               | 6                | 0              | -6.313225               | -2.379076 | 2.892063  |
| 28               | 1                | 0              | -6.169782               | -3.446186 | 3.166933  |

|    |   |   |           |           |           |
|----|---|---|-----------|-----------|-----------|
| 29 | 1 | 0 | -6.993128 | -2.339575 | 2.014162  |
| 30 | 1 | 0 | -6.800329 | -1.862845 | 3.746107  |
| 31 | 6 | 0 | -4.482060 | 1.800281  | -1.154451 |
| 32 | 1 | 0 | -4.046095 | 0.942596  | -1.707531 |
| 33 | 6 | 0 | -5.680572 | 2.274252  | -1.984850 |
| 34 | 1 | 0 | -6.459666 | 1.482606  | -2.016424 |
| 35 | 1 | 0 | -5.362011 | 2.484893  | -3.028398 |
| 36 | 1 | 0 | -6.127839 | 3.199532  | -1.564327 |
| 37 | 6 | 0 | -3.395394 | 2.879358  | -1.091727 |
| 38 | 1 | 0 | -3.795797 | 3.835157  | -0.692313 |
| 39 | 1 | 0 | -2.985397 | 3.066896  | -2.107260 |
| 40 | 1 | 0 | -2.564491 | 2.543575  | -0.436664 |
| 41 | 6 | 0 | -2.727509 | -1.005278 | -0.150283 |
| 42 | 6 | 0 | -2.216292 | -2.149428 | -1.032412 |
| 43 | 1 | 0 | -2.955317 | -2.350731 | -1.812335 |
| 44 | 6 | 0 | -1.993336 | -3.409897 | -0.177617 |
| 45 | 1 | 0 | -2.936901 | -3.633125 | 0.329975  |
| 46 | 1 | 0 | -1.246341 | -3.192101 | 0.591609  |
| 47 | 6 | 0 | -1.551340 | -4.592886 | -1.044297 |
| 48 | 1 | 0 | -2.372426 | -4.880169 | -1.714442 |
| 49 | 6 | 0 | -0.314636 | -4.222629 | -1.864544 |
| 50 | 1 | 0 | -0.064975 | -5.017766 | -2.575934 |
| 51 | 6 | 0 | -1.203143 | -0.542882 | -2.658195 |
| 52 | 1 | 0 | -1.963989 | -0.855808 | -3.377726 |
| 53 | 1 | 0 | -1.626673 | 0.218370  | -2.007377 |
| 54 | 6 | 0 | -0.005364 | 0.041691  | -3.417278 |
| 55 | 1 | 0 | -0.436746 | 0.802577  | -4.076313 |
| 56 | 1 | 0 | 0.418150  | -0.709692 | -4.091903 |
| 57 | 6 | 0 | 1.200686  | 0.611811  | -2.658675 |
| 58 | 1 | 0 | 1.624972  | -0.161727 | -2.023492 |
| 59 | 1 | 0 | 1.957077  | 0.933380  | -3.379363 |
| 60 | 6 | 0 | 0.343370  | 4.279573  | -1.776982 |
| 61 | 1 | 0 | 0.091973  | 5.093732  | -2.466004 |
| 62 | 6 | 0 | 1.587634  | 4.623356  | -0.956458 |
| 63 | 1 | 0 | 2.404801  | 4.924212  | -1.625647 |
| 64 | 6 | 0 | 2.030788  | 3.418055  | -0.122413 |
| 65 | 1 | 0 | 1.292260  | 3.187986  | 0.651317  |
| 66 | 1 | 0 | 2.981714  | 3.626944  | 0.377678  |
| 67 | 6 | 0 | 2.236329  | 2.173659  | -1.004913 |
| 68 | 1 | 0 | 2.974738  | 2.385061  | -1.783548 |
| 69 | 6 | 0 | 2.734590  | 1.013380  | -0.134880 |
| 70 | 6 | 0 | 4.698740  | -0.091091 | 0.711011  |
| 71 | 6 | 0 | 4.899758  | -1.418128 | 0.249871  |
| 72 | 6 | 0 | 5.492938  | -2.356651 | 1.113430  |

|     |   |   |           |           |           |
|-----|---|---|-----------|-----------|-----------|
| 73  | 1 | 0 | 5.647536  | -3.379615 | 0.796128  |
| 74  | 6 | 0 | 5.891762  | -1.992270 | 2.395528  |
| 75  | 1 | 0 | 6.345238  | -2.727457 | 3.047997  |
| 76  | 6 | 0 | 5.712990  | -0.686867 | 2.842059  |
| 77  | 1 | 0 | 6.037946  | -0.435178 | 3.843056  |
| 78  | 6 | 0 | 5.126206  | 0.284751  | 2.011236  |
| 79  | 6 | 0 | 4.959409  | 1.711220  | 2.524216  |
| 80  | 1 | 0 | 4.515443  | 2.357683  | 1.740975  |
| 81  | 6 | 0 | 6.313788  | 2.338822  | 2.875165  |
| 82  | 1 | 0 | 6.180188  | 3.409434  | 3.140984  |
| 83  | 1 | 0 | 6.997141  | 2.285430  | 2.000385  |
| 84  | 1 | 0 | 6.791192  | 1.824132  | 3.735542  |
| 85  | 6 | 0 | 4.002653  | 1.759972  | 3.720390  |
| 86  | 1 | 0 | 3.023182  | 1.314104  | 3.443364  |
| 87  | 1 | 0 | 3.824895  | 2.813817  | 4.024086  |
| 88  | 1 | 0 | 4.414869  | 1.208778  | 4.591957  |
| 89  | 6 | 0 | 4.473216  | -1.848539 | -1.149675 |
| 90  | 1 | 0 | 4.042928  | -0.991648 | -1.707880 |
| 91  | 6 | 0 | 5.671975  | -2.335386 | -1.972123 |
| 92  | 1 | 0 | 6.460413  | -1.552752 | -1.997304 |
| 93  | 1 | 0 | 5.358470  | -2.541157 | -3.017995 |
| 94  | 1 | 0 | 6.105091  | -3.266288 | -1.548916 |
| 95  | 6 | 0 | 3.380275  | -2.920696 | -1.083460 |
| 96  | 1 | 0 | 3.773883  | -3.875851 | -0.675678 |
| 97  | 1 | 0 | 2.973029  | -3.113897 | -2.098884 |
| 98  | 1 | 0 | 2.549195  | -2.575376 | -0.433654 |
| 99  | 1 | 0 | -1.340976 | -5.454620 | -0.402111 |
| 100 | 1 | 0 | 0.551052  | -4.087617 | -1.209826 |
| 101 | 6 | 0 | -0.543115 | -2.953775 | -2.673613 |
| 102 | 1 | 0 | 0.363002  | -2.642758 | -3.191231 |
| 103 | 1 | 0 | -1.353207 | -3.076482 | -3.398961 |
| 104 | 1 | 0 | -0.518677 | 4.129447  | -1.120548 |
| 105 | 1 | 0 | 1.386131  | 5.469978  | -0.291834 |
| 106 | 6 | 0 | 0.560874  | 3.029821  | -2.618696 |
| 107 | 1 | 0 | 1.369514  | 3.162913  | -3.343003 |
| 108 | 1 | 0 | -0.348683 | 2.737986  | -3.141182 |

---

### L3c-Mg(II)-COM

Zero-point correction= 1.08016 a.u.

Thermal correction to Gibbs Free Energy= 0.98621 a.u.

Sum of electronic and zero-point Energies= -5368.03774 a.u.

Sum of electronic and thermal Free Energies= -5368.13169 a.u.

The number of imaginary frequencies        0

## Standard orientation

| Center<br>Number | Atomic<br>Number | Atomic<br>Type | Coordinates (Angstroms) |           |           |
|------------------|------------------|----------------|-------------------------|-----------|-----------|
|                  |                  |                | X                       | Y         | Z         |
| 1                | 6                | 0              | 0.024636                | 1.767553  | -1.719119 |
| 2                | 6                | 0              | 0.513191                | 2.213976  | -0.332805 |
| 3                | 6                | 0              | 0.884150                | 3.600430  | -0.476555 |
| 4                | 6                | 0              | 0.639532                | 3.937651  | -1.833822 |
| 5                | 7                | 0              | 0.129300                | 2.819424  | -2.550584 |
| 6                | 8                | 0              | 0.519254                | 1.404618  | 0.590574  |
| 7                | 6                | 0              | 1.392128                | 4.564444  | 0.397100  |
| 8                | 6                | 0              | 0.890793                | 5.203618  | -2.322743 |
| 9                | 8                | 0              | -0.367811               | 0.615300  | -1.925132 |
| 10               | 6                | 0              | -0.222326               | 2.824619  | -3.965495 |
| 11               | 1                | 0              | 0.651493                | 3.094627  | -4.564927 |
| 12               | 1                | 0              | -0.553461               | 1.821076  | -4.233949 |
| 13               | 1                | 0              | -1.030961               | 3.538192  | -4.147538 |
| 14               | 6                | 0              | 1.655025                | 5.849639  | -0.075751 |
| 15               | 6                | 0              | 1.403254                | 6.149466  | -1.417707 |
| 16               | 35               | 0              | 1.719719                | 4.126191  | 2.209265  |
| 17               | 1                | 0              | 2.050941                | 6.609911  | 0.587503  |
| 18               | 1                | 0              | 1.612212                | 7.153607  | -1.774159 |
| 19               | 1                | 0              | 0.706546                | 5.467357  | -3.357882 |
| 20               | 8                | 0              | 1.745810                | -1.040932 | -0.536922 |
| 21               | 12               | 0              | -0.214044               | -0.606776 | -0.095513 |
| 22               | 8                | 0              | -0.735218               | -2.307566 | -1.040458 |
| 23               | 8                | 0              | -0.078705               | -1.337441 | 1.780359  |
| 24               | 8                | 0              | -2.151417               | -0.078183 | 0.334415  |
| 25               | 7                | 0              | 3.567122                | -2.281344 | -1.066613 |
| 26               | 1                | 0              | 3.930506                | -3.163777 | -1.409557 |
| 27               | 7                | 0              | 0.093380                | -3.415476 | -1.051684 |
| 28               | 7                | 0              | -4.190916               | -0.190942 | 1.315313  |
| 29               | 1                | 0              | -4.748907               | -0.520297 | 2.095447  |
| 30               | 7                | 0              | -1.164500               | -1.896231 | 2.429427  |
| 31               | 6                | 0              | 4.459537                | -1.415476 | -0.391382 |
| 32               | 6                | 0              | 4.825629                | -1.688548 | 0.952928  |
| 33               | 6                | 0              | 5.675814                | -0.790137 | 1.622639  |
| 34               | 1                | 0              | 5.965105                | -0.964674 | 2.650543  |
| 35               | 6                | 0              | 6.153843                | 0.349475  | 0.983643  |
| 36               | 1                | 0              | 6.804138                | 1.032428  | 1.515155  |
| 37               | 6                | 0              | 5.794238                | 0.619595  | -0.332860 |
| 38               | 1                | 0              | 6.176227                | 1.518788  | -0.797789 |
| 39               | 6                | 0              | 4.949052                | -0.252619 | -1.042445 |

|    |   |   |           |           |           |
|----|---|---|-----------|-----------|-----------|
| 40 | 6 | 0 | 4.564475  | 0.078614  | -2.480933 |
| 41 | 1 | 0 | 3.918925  | -0.717050 | -2.906194 |
| 42 | 6 | 0 | 3.754054  | 1.377853  | -2.545443 |
| 43 | 1 | 0 | 2.882645  | 1.310630  | -1.862724 |
| 44 | 1 | 0 | 3.372571  | 1.542709  | -3.575906 |
| 45 | 1 | 0 | 4.367688  | 2.255733  | -2.251937 |
| 46 | 6 | 0 | 5.799656  | 0.154553  | -3.385904 |
| 47 | 1 | 0 | 5.488605  | 0.287259  | -4.444389 |
| 48 | 1 | 0 | 6.382611  | -0.788796 | -3.315520 |
| 49 | 1 | 0 | 6.458048  | 1.004599  | -3.108047 |
| 50 | 6 | 0 | 4.286279  | -2.908251 | 1.694554  |
| 51 | 1 | 0 | 3.652371  | -3.526227 | 1.025793  |
| 52 | 6 | 0 | 5.422656  | -3.822534 | 2.166705  |
| 53 | 1 | 0 | 6.067042  | -4.105406 | 1.306812  |
| 54 | 1 | 0 | 5.004707  | -4.755174 | 2.602938  |
| 55 | 1 | 0 | 6.050276  | -3.328499 | 2.938042  |
| 56 | 6 | 0 | 3.393835  | -2.486346 | 2.868253  |
| 57 | 1 | 0 | 3.979143  | -1.967237 | 3.656513  |
| 58 | 1 | 0 | 2.909682  | -3.378546 | 3.319819  |
| 59 | 1 | 0 | 2.594771  | -1.803005 | 2.511581  |
| 60 | 6 | 0 | 2.241751  | -2.062291 | -1.048787 |
| 61 | 6 | 0 | 1.411321  | -3.115680 | -1.785171 |
| 62 | 1 | 0 | 1.957674  | -4.062245 | -1.789937 |
| 63 | 6 | 0 | 1.137219  | -2.656331 | -3.226766 |
| 64 | 1 | 0 | 2.106452  | -2.463189 | -3.698554 |
| 65 | 1 | 0 | 0.585730  | -1.712510 | -3.197372 |
| 66 | 6 | 0 | 0.357384  | -3.720436 | -4.005745 |
| 67 | 1 | 0 | 0.990406  | -4.607378 | -4.144426 |
| 68 | 6 | 0 | -0.920380 | -4.107456 | -3.257563 |
| 69 | 1 | 0 | -1.415628 | -4.955446 | -3.744226 |
| 70 | 6 | 0 | 0.421047  | -3.896219 | 0.360296  |
| 71 | 1 | 0 | 1.013882  | -4.806069 | 0.232202  |
| 72 | 1 | 0 | 1.036123  | -3.123372 | 0.813062  |
| 73 | 6 | 0 | -0.768828 | -4.195520 | 1.276744  |
| 74 | 1 | 0 | -0.329474 | -4.637991 | 2.177524  |
| 75 | 1 | 0 | -1.392873 | -4.986705 | 0.847411  |
| 76 | 6 | 0 | -1.744373 | -3.074632 | 1.650708  |
| 77 | 1 | 0 | -2.175597 | -2.658415 | 0.744279  |
| 78 | 1 | 0 | -2.539967 | -3.484988 | 2.278835  |
| 79 | 6 | 0 | -0.158868 | -1.204549 | 4.639806  |
| 80 | 1 | 0 | 0.139897  | -1.614987 | 5.611130  |
| 81 | 6 | 0 | -1.206503 | -0.102028 | 4.812418  |
| 82 | 1 | 0 | -2.035868 | -0.470024 | 5.431708  |
| 83 | 6 | 0 | -1.747346 | 0.343925  | 3.450360  |



|     |   |   |           |           |           |
|-----|---|---|-----------|-----------|-----------|
| 84  | 1 | 0 | -0.969507 | 0.844996  | 2.867496  |
| 85  | 1 | 0 | -2.576989 | 1.048168  | 3.575832  |
| 86  | 6 | 0 | -2.277372 | -0.854710 | 2.646036  |
| 87  | 1 | 0 | -3.053419 | -1.373720 | 3.215998  |
| 88  | 6 | 0 | -2.859610 | -0.368317 | 1.317653  |
| 89  | 6 | 0 | -4.870133 | 0.233817  | 0.148877  |
| 90  | 6 | 0 | -5.439191 | -0.729255 | -0.725101 |
| 91  | 6 | 0 | -6.067715 | -0.290477 | -1.904458 |
| 92  | 1 | 0 | -6.503938 | -1.000021 | -2.595171 |
| 93  | 6 | 0 | -6.129911 | 1.063646  | -2.217722 |
| 94  | 1 | 0 | -6.611976 | 1.383274  | -3.132663 |
| 95  | 6 | 0 | -5.570340 | 2.008626  | -1.363644 |
| 96  | 1 | 0 | -5.629982 | 3.053036  | -1.640120 |
| 97  | 6 | 0 | -4.938818 | 1.616000  | -0.169770 |
| 98  | 6 | 0 | -4.337054 | 2.677402  | 0.746280  |
| 99  | 1 | 0 | -3.913813 | 2.210583  | 1.658863  |
| 100 | 6 | 0 | -5.403008 | 3.666488  | 1.232076  |
| 101 | 1 | 0 | -4.964320 | 4.362738  | 1.978770  |
| 102 | 1 | 0 | -6.236715 | 3.118683  | 1.721642  |
| 103 | 1 | 0 | -5.812625 | 4.269084  | 0.394224  |
| 104 | 6 | 0 | -3.182057 | 3.409586  | 0.054189  |
| 105 | 1 | 0 | -2.432158 | 2.675899  | -0.307314 |
| 106 | 1 | 0 | -2.676705 | 4.092726  | 0.770287  |
| 107 | 1 | 0 | -3.539968 | 4.007666  | -0.810316 |
| 108 | 6 | 0 | -5.348093 | -2.224234 | -0.433113 |
| 109 | 1 | 0 | -4.836645 | -2.406387 | 0.534339  |
| 110 | 6 | 0 | -6.740763 | -2.852639 | -0.305062 |
| 111 | 1 | 0 | -7.330355 | -2.319303 | 0.471012  |
| 112 | 1 | 0 | -6.652277 | -3.916607 | 0.003007  |
| 113 | 1 | 0 | -7.295337 | -2.813981 | -1.266268 |
| 114 | 6 | 0 | -4.515082 | -2.942811 | -1.501183 |
| 115 | 1 | 0 | -5.019340 | -2.923247 | -2.490527 |
| 116 | 1 | 0 | -4.353262 | -4.002859 | -1.210235 |
| 117 | 1 | 0 | -3.521720 | -2.456330 | -1.598484 |
| 118 | 1 | 0 | 0.115261  | -3.338529 | -5.003433 |
| 119 | 1 | 0 | -1.628234 | -3.273512 | -3.252671 |
| 120 | 6 | 0 | -0.621363 | -4.521000 | -1.823130 |
| 121 | 1 | 0 | -1.537776 | -4.718653 | -1.269197 |
| 122 | 1 | 0 | 0.025406  | -5.403277 | -1.782431 |
| 123 | 1 | 0 | 0.740467  | -0.805236 | 4.161972  |
| 124 | 1 | 0 | -0.772642 | 0.758547  | 5.332809  |
| 125 | 6 | 0 | -0.695677 | -2.360368 | 3.805693  |
| 126 | 1 | 0 | -1.554123 | -2.843558 | 4.282473  |
| 127 | 1 | 0 | 0.077233  | -3.103526 | 3.616328  |

-----  
**L3c-TS1-si**

Zero-point correction= 1.19362 a.u.

Thermal correction to Gibbs Free Energy= 1.08855 a.u.

Sum of electronic and zero-point Energies= -5600.45051 a.u.

Sum of electronic and thermal Free Energies= -5600.55559 a.u.

The number of imaginary frequencies        1

Standard orientation

-----

| Center<br>Number | Atomic<br>Number | Atomic<br>Type | Coordinates (Angstroms) |           |           |
|------------------|------------------|----------------|-------------------------|-----------|-----------|
|                  |                  |                | X                       | Y         | Z         |
| 1                | 6                | 0              | -0.786347               | 0.950521  | -1.955770 |
| 2                | 6                | 0              | -0.295418               | 1.833748  | -0.793430 |
| 3                | 6                | 0              | -1.180981               | 3.044374  | -0.916485 |
| 4                | 6                | 0              | -1.927344               | 2.904027  | -2.105274 |
| 5                | 7                | 0              | -1.650762               | 1.653860  | -2.718948 |
| 6                | 8                | 0              | -0.035667               | 1.193931  | 0.293130  |
| 7                | 6                | 0              | -1.418369               | 4.147289  | -0.115075 |
| 8                | 6                | 0              | -2.841730               | 3.857595  | -2.525727 |
| 9                | 8                | 0              | -0.451925               | -0.236665 | -2.053939 |
| 10               | 6                | 0              | -2.367481               | 1.125491  | -3.872020 |
| 11               | 1                | 0              | -3.443111               | 1.105585  | -3.670064 |
| 12               | 1                | 0              | -2.174115               | 1.743888  | -4.753163 |
| 13               | 1                | 0              | -2.013676               | 0.110098  | -4.053861 |
| 14               | 6                | 0              | -2.338142               | 5.128650  | -0.502379 |
| 15               | 6                | 0              | -3.026491               | 4.980701  | -1.706491 |
| 16               | 35               | 0              | -0.547974               | 4.312102  | 1.581220  |
| 17               | 1                | 0              | -2.519849               | 5.988535  | 0.132622  |
| 18               | 1                | 0              | -3.738931               | 5.743894  | -2.004702 |
| 19               | 1                | 0              | -3.410433               | 3.736044  | -3.441035 |
| 20               | 8                | 0              | 2.196131                | -0.838562 | -0.255469 |
| 21               | 12               | 0              | 0.076481                | -0.873697 | 0.037862  |
| 22               | 8                | 0              | 0.167849                | -2.805078 | -0.597129 |
| 23               | 8                | 0              | 0.225144                | -1.280560 | 2.028162  |
| 24               | 8                | 0              | -2.003244               | -1.046916 | 0.280211  |
| 25               | 7                | 0              | 4.310755                | -1.676525 | -0.440820 |
| 26               | 1                | 0              | 4.887851                | -2.445311 | -0.763363 |
| 27               | 7                | 0              | 1.252199                | -3.630508 | -0.378091 |
| 28               | 7                | 0              | -4.019050               | -1.490832 | 1.225250  |
| 29               | 1                | 0              | -4.546650               | -1.642962 | 2.077283  |
| 30               | 7                | 0              | -0.708459               | -2.036582 | 2.711587  |
| 31               | 6                | 0              | 4.964225                | -0.467557 | -0.102729 |

-----

|    |   |   |          |           |           |
|----|---|---|----------|-----------|-----------|
| 32 | 6 | 0 | 5.067064 | -0.072604 | 1.258157  |
| 33 | 6 | 0 | 5.713276 | 1.137552  | 1.569744  |
| 34 | 1 | 0 | 5.795688 | 1.472730  | 2.595066  |
| 35 | 6 | 0 | 6.267285 | 1.928046  | 0.568738  |
| 36 | 1 | 0 | 6.762782 | 2.855147  | 0.826959  |
| 37 | 6 | 0 | 6.191661 | 1.530716  | -0.761690 |
| 38 | 1 | 0 | 6.642772 | 2.164113  | -1.513964 |
| 39 | 6 | 0 | 5.547369 | 0.332990  | -1.121591 |
| 40 | 6 | 0 | 5.500652 | -0.078313 | -2.589943 |
| 41 | 1 | 0 | 4.944266 | -1.028538 | -2.713439 |
| 42 | 6 | 0 | 4.763564 | 0.963228  | -3.439831 |
| 43 | 1 | 0 | 3.747736 | 1.138582  | -3.031268 |
| 44 | 1 | 0 | 4.652290 | 0.595775  | -4.482465 |
| 45 | 1 | 0 | 5.309598 | 1.929549  | -3.467346 |
| 46 | 6 | 0 | 6.911445 | -0.330127 | -3.134858 |
| 47 | 1 | 0 | 6.856007 | -0.721870 | -4.173265 |
| 48 | 1 | 0 | 7.432217 | -1.086836 | -2.509686 |
| 49 | 1 | 0 | 7.515209 | 0.602004  | -3.144918 |
| 50 | 6 | 0 | 4.511336 | -0.934727 | 2.386607  |
| 51 | 1 | 0 | 4.071229 | -1.869431 | 1.985215  |
| 52 | 6 | 0 | 5.619728 | -1.372578 | 3.351979  |
| 53 | 1 | 0 | 6.431980 | -1.885920 | 2.793974  |
| 54 | 1 | 0 | 5.213428 | -2.087108 | 4.099741  |
| 55 | 1 | 0 | 6.051059 | -0.506946 | 3.897505  |
| 56 | 6 | 0 | 3.389265 | -0.206872 | 3.134156  |
| 57 | 1 | 0 | 3.768221 | 0.697154  | 3.655946  |
| 58 | 1 | 0 | 2.939893 | -0.884099 | 3.890909  |
| 59 | 1 | 0 | 2.592959 | 0.100389  | 2.424046  |
| 60 | 6 | 0 | 2.970783 | -1.768846 | -0.547036 |
| 61 | 6 | 0 | 2.496720 | -3.110178 | -1.112307 |
| 62 | 1 | 0 | 3.269511 | -3.864390 | -0.937278 |
| 63 | 6 | 0 | 2.220201 | -2.982259 | -2.618373 |
| 64 | 1 | 0 | 3.126606 | -2.593504 | -3.093261 |
| 65 | 1 | 0 | 1.422329 | -2.249838 | -2.767974 |
| 66 | 6 | 0 | 0.653776 | -4.940297 | -2.454185 |
| 67 | 1 | 0 | 0.448602 | -5.962527 | -2.792119 |
| 68 | 6 | 0 | 0.921349 | -5.003640 | -0.955704 |
| 69 | 1 | 0 | 1.769429 | -5.656622 | -0.724017 |
| 70 | 6 | 0 | 1.580698 | -3.754523 | 1.107558  |
| 71 | 1 | 0 | 2.429694 | -4.441077 | 1.171186  |
| 72 | 1 | 0 | 1.883870 | -2.763803 | 1.432302  |
| 73 | 6 | 0 | 0.454336 | -4.254836 | 2.015513  |
| 74 | 1 | 0 | 0.915800 | -4.385686 | 3.000174  |
| 75 | 1 | 0 | 0.138531 | -5.259858 | 1.715770  |

|     |   |   |           |           |           |
|-----|---|---|-----------|-----------|-----------|
| 76  | 6 | 0 | -0.839140 | -3.441629 | 2.128322  |
| 77  | 1 | 0 | -1.273383 | -3.320723 | 1.139693  |
| 78  | 1 | 0 | -1.543337 | -3.970331 | 2.777034  |
| 79  | 6 | 0 | -0.262035 | -2.116040 | 4.169289  |
| 80  | 1 | 0 | -0.980562 | -2.760642 | 4.685023  |
| 81  | 6 | 0 | -0.177224 | -0.737299 | 4.812183  |
| 82  | 1 | 0 | 0.134036  | -0.880429 | 5.853467  |
| 83  | 6 | 0 | -2.016613 | 0.047769  | 3.290491  |
| 84  | 1 | 0 | -1.364859 | 0.661026  | 2.661364  |
| 85  | 1 | 0 | -3.020683 | 0.481657  | 3.252336  |
| 86  | 6 | 0 | -2.095866 | -1.368752 | 2.695265  |
| 87  | 1 | 0 | -2.729499 | -2.003077 | 3.322430  |
| 88  | 6 | 0 | -2.684322 | -1.303190 | 1.285900  |
| 89  | 6 | 0 | -4.737704 | -1.211498 | 0.037808  |
| 90  | 6 | 0 | -4.782894 | -2.173836 | -1.004911 |
| 91  | 6 | 0 | -5.397315 | -1.830991 | -2.222863 |
| 92  | 1 | 0 | -5.442186 | -2.540335 | -3.038594 |
| 93  | 6 | 0 | -5.951076 | -0.568914 | -2.410760 |
| 94  | 1 | 0 | -6.407896 | -0.316557 | -3.359231 |
| 95  | 6 | 0 | -5.926063 | 0.368629  | -1.383527 |
| 96  | 1 | 0 | -6.363049 | 1.341649  | -1.564293 |
| 97  | 6 | 0 | -5.343674 | 0.060416  | -0.140621 |
| 98  | 6 | 0 | -5.344937 | 1.105566  | 0.969781  |
| 99  | 1 | 0 | -4.962359 | 0.669547  | 1.913475  |
| 100 | 6 | 0 | -6.762669 | 1.600259  | 1.284445  |
| 101 | 1 | 0 | -6.749281 | 2.240434  | 2.192631  |
| 102 | 1 | 0 | -7.433763 | 0.737434  | 1.483392  |
| 103 | 1 | 0 | -7.183225 | 2.198112  | 0.448716  |
| 104 | 6 | 0 | -4.418839 | 2.271233  | 0.616426  |
| 105 | 1 | 0 | -3.392562 | 1.888057  | 0.440191  |
| 106 | 1 | 0 | -4.374546 | 2.997596  | 1.455875  |
| 107 | 1 | 0 | -4.770082 | 2.801253  | -0.293868 |
| 108 | 6 | 0 | -4.189965 | -3.567908 | -0.829064 |
| 109 | 1 | 0 | -3.752025 | -3.681705 | 0.184239  |
| 110 | 6 | 0 | -5.270652 | -4.648817 | -0.949120 |
| 111 | 1 | 0 | -6.082672 | -4.459938 | -0.214498 |
| 112 | 1 | 0 | -4.836604 | -5.648141 | -0.730310 |
| 113 | 1 | 0 | -5.709249 | -4.675217 | -1.968966 |
| 114 | 6 | 0 | -3.053877 | -3.815100 | -1.827200 |
| 115 | 1 | 0 | -3.432362 | -3.864356 | -2.869985 |
| 116 | 1 | 0 | -2.546401 | -4.775118 | -1.592713 |
| 117 | 1 | 0 | -2.304626 | -2.998741 | -1.760785 |
| 118 | 1 | 0 | 0.711550  | -2.603114 | 4.150925  |
| 119 | 1 | 0 | 0.601361  | -0.155626 | 4.312134  |

|     |   |   |           |           |           |
|-----|---|---|-----------|-----------|-----------|
| 120 | 1 | 0 | 0.041099  | -5.345107 | -0.412686 |
| 121 | 1 | 0 | -0.246695 | -4.347647 | -2.634767 |
| 122 | 6 | 0 | 1.835970  | -4.338920 | -3.216705 |
| 123 | 1 | 0 | 2.698938  | -5.016994 | -3.167599 |
| 124 | 1 | 0 | 1.583037  | -4.215447 | -4.275382 |
| 125 | 6 | 0 | -1.512603 | 0.004540  | 4.735808  |
| 126 | 1 | 0 | -1.403735 | 1.025578  | 5.117598  |
| 127 | 1 | 0 | -2.257138 | -0.499030 | 5.367669  |
| 128 | 6 | 0 | 1.322439  | 2.345920  | -1.682877 |
| 129 | 6 | 0 | 1.999997  | 3.237344  | -0.821510 |
| 130 | 8 | 0 | 1.874005  | 4.510586  | -1.094273 |
| 131 | 6 | 0 | 2.437069  | 5.536980  | -0.236199 |
| 132 | 1 | 0 | 2.165619  | 6.477057  | -0.714361 |
| 133 | 6 | 0 | 2.723779  | 2.758731  | 0.384079  |
| 134 | 1 | 0 | 1.993128  | 5.476107  | 0.758508  |
| 135 | 1 | 0 | 2.906937  | 1.688727  | 0.307863  |
| 136 | 1 | 0 | 1.761458  | 1.354474  | -1.730524 |
| 137 | 1 | 0 | 1.024514  | 2.767539  | -2.640501 |
| 138 | 1 | 0 | 3.661732  | 3.299806  | 0.539160  |
| 139 | 1 | 0 | 3.523504  | 5.435235  | -0.191521 |
| 140 | 1 | 0 | 2.087935  | 2.928454  | 1.263945  |

**L3c-TS1-re**

Zero-point correction= 1.19472 a.u.

Thermal correction to Gibbs Free Energy= 1.09896 a.u.

Sum of electronic and zero-point Energies= -5600.44400 a.u.

Sum of electronic and thermal Free Energies= -5600.53975 a.u.

The number of imaginary frequencies 1

Standard orientation

| Center<br>Number | Atomic<br>Number | Atomic<br>Type | Coordinates (Angstroms) |          |           |
|------------------|------------------|----------------|-------------------------|----------|-----------|
|                  |                  |                | X                       | Y        | Z         |
| 1                | 6                | 0              | -0.666178               | 3.025580 | -1.104761 |
| 2                | 6                | 0              | -0.453189               | 4.031623 | -0.140610 |
| 3                | 8                | 0              | 0.175895                | 5.102510 | -0.559163 |
| 4                | 6                | 0              | 0.557137                | 6.176802 | 0.338661  |
| 5                | 6                | 0              | -0.831275               | 3.803768 | 1.277660  |
| 6                | 1                | 0              | -1.489081               | 2.347470 | -0.899893 |
| 7                | 1                | 0              | -0.566326               | 3.338802 | -2.140999 |
| 8                | 1                | 0              | 0.977143                | 6.943801 | -0.310986 |
| 9                | 1                | 0              | 1.314481                | 5.816662 | 1.036829  |
| 10               | 1                | 0              | -0.317576               | 6.564343 | 0.864721  |

|    |    |   |           |           |           |
|----|----|---|-----------|-----------|-----------|
| 11 | 1  | 0 | -0.477150 | 4.567538  | 1.968773  |
| 12 | 1  | 0 | -0.423289 | 2.819743  | 1.556491  |
| 13 | 6  | 0 | 0.434110  | 0.903410  | -2.037568 |
| 14 | 6  | 0 | 0.745186  | 1.700124  | -0.760633 |
| 15 | 6  | 0 | 2.007465  | 2.420445  | -1.135910 |
| 16 | 6  | 0 | 2.204616  | 2.232294  | -2.520376 |
| 17 | 7  | 0 | 1.218885  | 1.353488  | -3.042785 |
| 18 | 8  | 0 | 0.486213  | 1.108480  | 0.346190  |
| 19 | 8  | 0 | -0.362495 | -0.043973 | -2.039027 |
| 20 | 6  | 0 | 1.175997  | 0.871824  | -4.417037 |
| 21 | 6  | 0 | 2.945881  | 3.149163  | -0.426103 |
| 22 | 6  | 0 | 3.277706  | 2.789404  | -3.198638 |
| 23 | 1  | 0 | 0.912185  | 1.689571  | -5.094574 |
| 24 | 1  | 0 | 0.417357  | 0.090548  | -4.477759 |
| 25 | 1  | 0 | 2.146736  | 0.461969  | -4.710188 |
| 26 | 6  | 0 | 4.200985  | 3.532467  | -2.448294 |
| 27 | 6  | 0 | 4.054979  | 3.706987  | -1.072314 |
| 28 | 1  | 0 | 3.419873  | 2.638638  | -4.263340 |
| 29 | 1  | 0 | 5.059565  | 3.971075  | -2.947748 |
| 30 | 1  | 0 | 4.791747  | 4.266285  | -0.506532 |
| 31 | 35 | 0 | 2.759274  | 3.370544  | 1.462721  |
| 32 | 8  | 0 | -0.899300 | -2.649583 | -0.585257 |
| 33 | 8  | 0 | 1.543639  | -1.447490 | 0.010710  |
| 34 | 12 | 0 | -0.451144 | -0.760773 | 0.080548  |
| 35 | 8  | 0 | -0.705558 | -1.129239 | 2.065438  |
| 36 | 7  | 0 | 3.345214  | -2.825626 | 0.068139  |
| 37 | 1  | 0 | 3.732493  | -3.733213 | -0.164348 |
| 38 | 7  | 0 | -0.179574 | -3.777179 | -0.230530 |
| 39 | 7  | 0 | -4.648830 | -0.000503 | 0.793003  |
| 40 | 1  | 0 | -5.289249 | -0.002749 | 1.578756  |
| 41 | 7  | 0 | -1.899888 | -1.550547 | 2.618372  |
| 42 | 6  | 0 | 4.242938  | -1.779123 | 0.391406  |
| 43 | 6  | 0 | 4.307338  | -1.285803 | 1.721237  |
| 44 | 6  | 0 | 5.110683  | -0.163831 | 1.993682  |
| 45 | 1  | 0 | 5.172629  | 0.241938  | 2.994874  |
| 46 | 6  | 0 | 5.834596  | 0.456826  | 0.980945  |
| 47 | 1  | 0 | 6.435355  | 1.329049  | 1.204705  |
| 48 | 6  | 0 | 5.793894  | -0.040974 | -0.317197 |
| 49 | 1  | 0 | 6.367375  | 0.466482  | -1.081532 |
| 50 | 6  | 0 | 5.022232  | -1.174786 | -0.629953 |
| 51 | 6  | 0 | 5.013352  | -1.706470 | -2.058791 |
| 52 | 1  | 0 | 4.441242  | -2.653264 | -2.118516 |
| 53 | 6  | 0 | 4.322705  | -0.718459 | -3.000526 |
| 54 | 1  | 0 | 3.290419  | -0.525386 | -2.641595 |

|    |   |   |           |           |           |
|----|---|---|-----------|-----------|-----------|
| 55 | 1 | 0 | 4.257357  | -1.145818 | -4.023750 |
| 56 | 1 | 0 | 4.876848  | 0.242305  | -3.052509 |
| 57 | 6 | 0 | 6.428164  | -2.040706 | -2.548381 |
| 58 | 1 | 0 | 6.378202  | -2.552335 | -3.533723 |
| 59 | 1 | 0 | 6.929317  | -2.726277 | -1.831928 |
| 60 | 1 | 0 | 7.047934  | -1.126966 | -2.665370 |
| 61 | 6 | 0 | 3.533242  | -1.948964 | 2.855658  |
| 62 | 1 | 0 | 2.958378  | -2.821042 | 2.480045  |
| 63 | 6 | 0 | 4.482745  | -2.495717 | 3.928118  |
| 64 | 1 | 0 | 5.214212  | -3.195635 | 3.470100  |
| 65 | 1 | 0 | 3.907559  | -3.055098 | 4.696802  |
| 66 | 1 | 0 | 5.038578  | -1.678522 | 4.434608  |
| 67 | 6 | 0 | 2.514030  | -0.982902 | 3.468900  |
| 68 | 1 | 0 | 3.015089  | -0.145568 | 3.998809  |
| 69 | 1 | 0 | 1.871885  | -1.523561 | 4.196334  |
| 70 | 1 | 0 | 1.864234  | -0.559381 | 2.675376  |
| 71 | 6 | 0 | 2.045733  | -2.566155 | -0.180791 |
| 72 | 6 | 0 | 1.257480  | -3.727839 | -0.781152 |
| 73 | 1 | 0 | 1.714629  | -4.677593 | -0.487292 |
| 74 | 6 | 0 | 1.243678  | -3.598449 | -2.314212 |
| 75 | 1 | 0 | 2.283072  | -3.551301 | -2.654834 |
| 76 | 1 | 0 | 0.761167  | -2.652718 | -2.578122 |
| 77 | 6 | 0 | 0.517519  | -4.781916 | -2.959045 |
| 78 | 1 | 0 | 1.087194  | -5.703666 | -2.778096 |
| 79 | 6 | 0 | -0.890417 | -4.912868 | -2.377636 |
| 80 | 1 | 0 | -1.384247 | -5.821358 | -2.741133 |
| 81 | 6 | 0 | -0.109928 | -3.950565 | 1.284498  |
| 82 | 1 | 0 | 0.452869  | -4.871717 | 1.458511  |
| 83 | 1 | 0 | 0.456390  | -3.102938 | 1.661302  |
| 84 | 6 | 0 | -1.452155 | -4.035106 | 2.015306  |
| 85 | 1 | 0 | -1.205839 | -4.294043 | 3.050117  |
| 86 | 1 | 0 | -2.038621 | -4.883815 | 1.647528  |
| 87 | 6 | 0 | -2.404037 | -2.837173 | 1.969638  |
| 88 | 1 | 0 | -2.616351 | -2.590969 | 0.933188  |
| 89 | 1 | 0 | -3.332376 | -3.094139 | 2.486798  |
| 90 | 6 | 0 | -1.238876 | -0.504441 | 4.823322  |
| 91 | 1 | 0 | -1.109417 | -0.751568 | 5.883211  |
| 92 | 6 | 0 | -2.263310 | 0.616183  | 4.642436  |
| 93 | 1 | 0 | -3.198107 | 0.356918  | 5.158024  |
| 94 | 6 | 0 | -2.545012 | 0.834920  | 3.153420  |
| 95 | 1 | 0 | -1.654873 | 1.210365  | 2.642546  |
| 96 | 1 | 0 | -3.348625 | 1.566147  | 3.015040  |
| 97 | 6 | 0 | -2.985311 | -0.472684 | 2.475010  |
| 98 | 1 | 0 | -3.861872 | -0.877162 | 2.988792  |

|     |   |   |           |           |           |
|-----|---|---|-----------|-----------|-----------|
| 99  | 6 | 0 | -3.334710 | -0.210391 | 1.005307  |
| 100 | 6 | 0 | -5.166526 | 0.368215  | -0.471997 |
| 101 | 6 | 0 | -5.401334 | -0.625352 | -1.460369 |
| 102 | 6 | 0 | -5.923586 | -0.236799 | -2.707320 |
| 103 | 1 | 0 | -6.102078 | -0.968255 | -3.484482 |
| 104 | 6 | 0 | -6.248008 | 1.091074  | -2.961516 |
| 105 | 1 | 0 | -6.662963 | 1.370153  | -3.921548 |
| 106 | 6 | 0 | -6.061433 | 2.058725  | -1.980544 |
| 107 | 1 | 0 | -6.349229 | 3.077526  | -2.202814 |
| 108 | 6 | 0 | -5.512277 | 1.721945  | -0.729750 |
| 109 | 6 | 0 | -5.325062 | 2.810338  | 0.322711  |
| 110 | 1 | 0 | -4.782430 | 2.410031  | 1.202883  |
| 111 | 6 | 0 | -6.680738 | 3.310229  | 0.831645  |
| 112 | 1 | 0 | -6.534686 | 4.059720  | 1.638673  |
| 113 | 1 | 0 | -7.265911 | 2.463860  | 1.250997  |
| 114 | 1 | 0 | -7.268329 | 3.781743  | 0.015110  |
| 115 | 6 | 0 | -4.480776 | 3.975982  | -0.210160 |
| 116 | 1 | 0 | -3.543069 | 3.595757  | -0.663393 |
| 117 | 1 | 0 | -4.214201 | 4.664330  | 0.620211  |
| 118 | 1 | 0 | -5.030338 | 4.562237  | -0.976133 |
| 119 | 6 | 0 | -5.142056 | -2.103326 | -1.187787 |
| 120 | 1 | 0 | -4.766004 | -2.251359 | -0.155861 |
| 121 | 6 | 0 | -6.435401 | -2.921638 | -1.285216 |
| 122 | 1 | 0 | -7.205752 | -2.501532 | -0.603178 |
| 123 | 1 | 0 | -6.244834 | -3.973218 | -0.980714 |
| 124 | 1 | 0 | -6.837358 | -2.926070 | -2.320319 |
| 125 | 6 | 0 | -4.070545 | -2.659921 | -2.130371 |
| 126 | 1 | 0 | -4.420118 | -2.666317 | -3.184198 |
| 127 | 1 | 0 | -3.818237 | -3.701544 | -1.839183 |
| 128 | 1 | 0 | -3.148870 | -2.044179 | -2.066432 |
| 129 | 8 | 0 | -2.482509 | -0.146411 | 0.101773  |
| 130 | 1 | 0 | -0.265432 | -0.189961 | 4.437408  |
| 131 | 1 | 0 | -1.895669 | 1.546829  | 5.088384  |
| 132 | 6 | 0 | -1.671845 | -1.778254 | 4.110554  |
| 133 | 1 | 0 | -2.609857 | -2.170780 | 4.516466  |
| 134 | 1 | 0 | -0.900740 | -2.543877 | 4.176922  |
| 135 | 1 | 0 | 0.471049  | -4.638362 | -4.044049 |
| 136 | 1 | 0 | -1.501443 | -4.060518 | -2.686170 |
| 137 | 6 | 0 | -0.866460 | -4.988000 | -0.856828 |
| 138 | 1 | 0 | -0.328453 | -5.873775 | -0.503524 |
| 139 | 1 | 0 | -1.876574 | -4.992421 | -0.451206 |
| 140 | 1 | 0 | -1.921260 | 3.728297  | 1.358153  |

---



**L3d-Mg(II)**

Zero-point correction= 1.01630 a.u.

Thermal correction to Gibbs Free Energy= 0.93528 a.u.

Sum of electronic and zero-point Energies= -2396.80953 a.u.

Sum of electronic and thermal Free Energies= -2396.89055 a.u.

The number of imaginary frequencies 0

Standard orientation

| Center<br>Number | Atomic<br>Number | Atomic<br>Type | Coordinates (Angstroms) |           |           |
|------------------|------------------|----------------|-------------------------|-----------|-----------|
|                  |                  |                | X                       | Y         | Z         |
| 1                | 8                | 0              | 0.249661                | 1.492346  | -1.379989 |
| 2                | 8                | 0              | 1.982884                | -0.001312 | 0.217146  |
| 3                | 12               | 0              | 0.008633                | -0.018947 | -0.146125 |
| 4                | 8                | 0              | -0.247905               | -1.613871 | -1.263213 |
| 5                | 7                | 0              | 4.182837                | 0.432704  | -0.086241 |
| 6                | 1                | 0              | 4.899698                | 0.963928  | -0.570396 |
| 7                | 7                | 0              | 1.332784                | 1.432321  | -2.255820 |
| 8                | 7                | 0              | -4.160338               | -0.360791 | -0.106000 |
| 9                | 1                | 0              | -4.879826               | -0.890350 | -0.587866 |
| 10               | 7                | 0              | -1.316203               | -1.607260 | -2.155467 |
| 11               | 6                | 0              | 4.591452                | -0.435717 | 0.954350  |
| 12               | 6                | 0              | 4.627020                | -1.838918 | 0.734691  |
| 13               | 6                | 0              | 4.965015                | -2.687039 | 1.804690  |
| 14               | 1                | 0              | 4.984207                | -3.761022 | 1.674109  |
| 15               | 6                | 0              | 5.279378                | -2.165477 | 3.055433  |
| 16               | 1                | 0              | 5.535924                | -2.832928 | 3.868104  |
| 17               | 6                | 0              | 5.266609                | -0.790442 | 3.266389  |
| 18               | 1                | 0              | 5.514292                | -0.417881 | 4.251543  |
| 19               | 6                | 0              | 4.930174                | 0.095227  | 2.226345  |
| 20               | 6                | 0              | 4.910569                | 1.596173  | 2.494475  |
| 21               | 1                | 0              | 4.667989                | 2.154663  | 1.568035  |
| 22               | 6                | 0              | 3.828566                | 1.956926  | 3.518669  |
| 23               | 1                | 0              | 2.837086                | 1.595605  | 3.170585  |
| 24               | 1                | 0              | 3.768956                | 3.059513  | 3.641222  |
| 25               | 1                | 0              | 4.044339                | 1.506536  | 4.510598  |
| 26               | 6                | 0              | 6.286571                | 2.101135  | 2.945408  |
| 27               | 1                | 0              | 6.278787                | 3.209542  | 3.024167  |
| 28               | 1                | 0              | 7.060342                | 1.815773  | 2.200651  |
| 29               | 1                | 0              | 6.569891                | 1.685074  | 3.935151  |
| 30               | 6                | 0              | 4.300512                | -2.443422 | -0.628056 |
| 31               | 1                | 0              | 4.107602                | -1.645647 | -1.374555 |
| 32               | 6                | 0              | 5.478519                | -3.257394 | -1.177218 |
| 33               | 1                | 0              | 6.396328                | -2.631399 | -1.202668 |

|    |   |   |           |           |           |
|----|---|---|-----------|-----------|-----------|
| 34 | 1 | 0 | 5.260919  | -3.589829 | -2.214989 |
| 35 | 1 | 0 | 5.676513  | -4.158299 | -0.559190 |
| 36 | 6 | 0 | 3.028388  | -3.295159 | -0.557072 |
| 37 | 1 | 0 | 3.179851  | -4.198020 | 0.071737  |
| 38 | 1 | 0 | 2.725186  | -3.620822 | -1.575242 |
| 39 | 1 | 0 | 2.198912  | -2.698023 | -0.125337 |
| 40 | 6 | 0 | 2.891972  | 0.615199  | -0.385903 |
| 41 | 6 | 0 | 2.654723  | 1.621418  | -1.510550 |
| 42 | 1 | 0 | 3.427898  | 1.456544  | -2.267272 |
| 43 | 6 | 0 | 2.675286  | 3.118357  | -1.115151 |
| 44 | 1 | 0 | 3.714113  | 3.453151  | -1.164708 |
| 45 | 6 | 0 | 1.816344  | 3.816213  | -2.232348 |
| 46 | 1 | 0 | 2.454697  | 4.461051  | -2.841703 |
| 47 | 6 | 0 | 2.057019  | 3.553633  | 0.234908  |
| 48 | 1 | 0 | 1.296255  | 2.841160  | 0.565438  |
| 49 | 1 | 0 | 2.809282  | 3.637012  | 1.024722  |
| 50 | 6 | 0 | 1.388107  | 4.899713  | -0.092882 |
| 51 | 1 | 0 | 2.146834  | 5.691469  | -0.144940 |
| 52 | 1 | 0 | 0.651822  | 5.198375  | 0.660780  |
| 53 | 6 | 0 | 0.766513  | 4.667566  | -1.479568 |
| 54 | 1 | 0 | -0.163665 | 4.101818  | -1.377940 |
| 55 | 1 | 0 | 0.539071  | 5.598441  | -2.009108 |
| 56 | 6 | 0 | 1.283677  | 2.683775  | -3.120603 |
| 57 | 1 | 0 | 1.929958  | 2.501599  | -3.982517 |
| 58 | 6 | 0 | 1.338391  | 0.143378  | -3.064056 |
| 59 | 1 | 0 | 2.157642  | 0.244093  | -3.779793 |
| 60 | 1 | 0 | 1.577520  | -0.658669 | -2.369155 |
| 61 | 6 | 0 | 0.050504  | -0.179863 | -3.828635 |
| 62 | 1 | 0 | 0.288118  | -1.068132 | -4.425772 |
| 63 | 1 | 0 | -0.156723 | 0.615116  | -4.553642 |
| 64 | 6 | 0 | -1.270049 | -0.400070 | -3.084147 |
| 65 | 1 | 0 | -1.517125 | 0.469698  | -2.478796 |
| 66 | 1 | 0 | -2.067110 | -0.556593 | -3.814572 |
| 67 | 6 | 0 | -1.295022 | -2.935923 | -2.907837 |
| 68 | 1 | 0 | -1.797935 | -2.774051 | -3.863067 |
| 69 | 6 | 0 | -1.190719 | -4.991440 | -1.276417 |
| 70 | 1 | 0 | -0.295498 | -5.279981 | -1.838373 |
| 71 | 1 | 0 | -1.786688 | -5.899958 | -1.127467 |
| 72 | 6 | 0 | -0.871034 | -4.346168 | 0.081511  |
| 73 | 1 | 0 | -0.013910 | -3.678363 | -0.018563 |
| 74 | 1 | 0 | -0.637855 | -5.089112 | 0.851420  |
| 75 | 6 | 0 | -2.132321 | -3.529331 | 0.424723  |
| 76 | 1 | 0 | -1.911529 | -2.670016 | 1.065734  |
| 77 | 1 | 0 | -2.846481 | -4.154866 | 0.971368  |

|     |   |   |           |           |           |
|-----|---|---|-----------|-----------|-----------|
| 78  | 6 | 0 | -2.053636 | -3.962459 | -2.038742 |
| 79  | 1 | 0 | -2.775434 | -4.469587 | -2.683243 |
| 80  | 6 | 0 | -2.784769 | -3.131211 | -0.930373 |
| 81  | 1 | 0 | -3.853359 | -3.356458 | -0.907046 |
| 82  | 6 | 0 | -2.653108 | -1.672747 | -1.427348 |
| 83  | 1 | 0 | -3.402023 | -1.519557 | -2.210794 |
| 84  | 6 | 0 | -2.869312 | -0.594858 | -0.365970 |
| 85  | 6 | 0 | -4.566373 | 0.512070  | 0.930915  |
| 86  | 6 | 0 | -4.593484 | 1.914560  | 0.708234  |
| 87  | 6 | 0 | -4.958165 | 2.764535  | 1.768006  |
| 88  | 1 | 0 | -4.978436 | 3.838028  | 1.633990  |
| 89  | 6 | 0 | -5.305062 | 2.244777  | 3.011110  |
| 90  | 1 | 0 | -5.585364 | 2.913103  | 3.815133  |
| 91  | 6 | 0 | -5.295525 | 0.869945  | 3.225438  |
| 92  | 1 | 0 | -5.569335 | 0.498613  | 4.204144  |
| 93  | 6 | 0 | -4.928704 | -0.016864 | 2.197065  |
| 94  | 6 | 0 | -4.904700 | -1.517559 | 2.470586  |
| 95  | 1 | 0 | -4.608716 | -2.077184 | 1.559856  |
| 96  | 6 | 0 | -6.294657 | -2.035249 | 2.858586  |
| 97  | 1 | 0 | -6.278520 | -3.143059 | 2.943862  |
| 98  | 1 | 0 | -7.035654 | -1.762528 | 2.077064  |
| 99  | 1 | 0 | -6.628805 | -1.615372 | 3.830819  |
| 100 | 6 | 0 | -3.868669 | -1.864182 | 3.545983  |
| 101 | 1 | 0 | -2.870553 | -1.470697 | 3.257421  |
| 102 | 1 | 0 | -3.785026 | -2.966538 | 3.656163  |
| 103 | 1 | 0 | -4.148866 | -1.435167 | 4.531270  |
| 104 | 6 | 0 | -4.248317 | 2.514070  | -0.651931 |
| 105 | 1 | 0 | -4.030279 | 1.713816  | -1.389039 |
| 106 | 6 | 0 | -5.428219 | 3.306800  | -1.227271 |
| 107 | 1 | 0 | -6.336885 | 2.668113  | -1.262135 |
| 108 | 1 | 0 | -5.198580 | 3.633211  | -2.264468 |
| 109 | 1 | 0 | -5.647819 | 4.209892  | -0.619746 |
| 110 | 6 | 0 | -2.990096 | 3.385456  | -0.568275 |
| 111 | 1 | 0 | -3.157146 | 4.279378  | 0.069176  |
| 112 | 1 | 0 | -2.698880 | 3.727814  | -1.584250 |
| 113 | 1 | 0 | -2.146632 | 2.799163  | -0.145769 |
| 114 | 8 | 0 | -1.953716 | 0.014095  | 0.235791  |
| 115 | 1 | 0 | -0.245312 | -3.170309 | -3.075783 |
| 116 | 1 | 0 | 0.251188  | 2.801013  | -3.447053 |

---

**L3d-Mg(II)-COM**

Zero-point correction= 1.14934 a.u.

Thermal correction to Gibbs Free Energy= 1.05687 a.u.

Sum of electronic and zero-point Energies= -5522.85777 a.u.

Sum of electronic and thermal Free Energies= -5522.95023 a.u.

The number of imaginary frequencies 0

Standard orientation

---

| Center<br>Number | Atomic<br>Number | Atomic<br>Type | Coordinates (Angstroms) |           |           |
|------------------|------------------|----------------|-------------------------|-----------|-----------|
|                  |                  |                | X                       | Y         | Z         |
| 1                | 6                | 0              | -0.398858               | -0.731892 | -1.941601 |
| 2                | 6                | 0              | -0.802587               | -1.602342 | -0.743049 |
| 3                | 6                | 0              | -1.576412               | -2.689813 | -1.291109 |
| 4                | 6                | 0              | -1.601897               | -2.489580 | -2.695947 |
| 5                | 7                | 0              | -0.878783               | -1.317904 | -3.054299 |
| 6                | 8                | 0              | -0.442391               | -1.279586 | 0.383627  |
| 7                | 8                | 0              | 0.245992                | 0.310954  | -1.796977 |
| 8                | 6                | 0              | -0.703613               | -0.832205 | -4.418211 |
| 9                | 6                | 0              | -2.248195               | -3.778211 | -0.731519 |
| 10               | 6                | 0              | -2.277224               | -3.349507 | -3.538340 |
| 11               | 1                | 0              | -0.115523               | -1.549321 | -4.997868 |
| 12               | 1                | 0              | -0.175892               | 0.120858  | -4.371328 |
| 13               | 1                | 0              | -1.678482               | -0.688185 | -4.891959 |
| 14               | 6                | 0              | -2.942874               | -4.435608 | -2.943694 |
| 15               | 6                | 0              | -2.938150               | -4.659338 | -1.563709 |
| 16               | 1                | 0              | -2.302647               | -3.200597 | -4.611777 |
| 17               | 1                | 0              | -3.484275               | -5.128447 | -3.580518 |
| 18               | 1                | 0              | -3.466706               | -5.509155 | -1.147756 |
| 19               | 35               | 0              | -2.229348               | -4.046159 | 1.143022  |
| 20               | 8                | 0              | 0.760550                | 2.781671  | 0.127620  |
| 21               | 8                | 0              | -1.516936               | 1.281961  | 0.368718  |
| 22               | 12               | 0              | 0.479751                | 0.789941  | 0.357763  |
| 23               | 8                | 0              | 0.857475                | 0.598583  | 2.330060  |
| 24               | 7                | 0              | -3.481028               | 2.394301  | 0.336179  |
| 25               | 1                | 0              | -3.975512               | 3.276905  | 0.262719  |
| 26               | 7                | 0              | -0.015320               | 3.692572  | 0.836239  |
| 27               | 7                | 0              | 4.481988                | -0.641340 | 0.491748  |
| 28               | 1                | 0              | 5.196313                | -0.907594 | 1.160698  |
| 29               | 7                | 0              | 2.085071                | 0.957379  | 2.867245  |
| 30               | 6                | 0              | -4.231191               | 1.193193  | 0.279155  |
| 31               | 6                | 0              | -4.366424               | 0.384433  | 1.440794  |
| 32               | 6                | 0              | -4.994788               | -0.868993 | 1.329154  |
| 33               | 1                | 0              | -5.097859               | -1.514471 | 2.191296  |
| 34               | 6                | 0              | -5.489366               | -1.312175 | 0.107414  |
| 35               | 1                | 0              | -5.961666               | -2.283637 | 0.037894  |
| 36               | 6                | 0              | -5.383852               | -0.511154 | -1.024407 |

|    |   |   |           |           |           |
|----|---|---|-----------|-----------|-----------|
| 37 | 1 | 0 | -5.780272 | -0.886228 | -1.958727 |
| 38 | 6 | 0 | -4.768175 | 0.752297  | -0.959503 |
| 39 | 6 | 0 | -4.663931 | 1.599666  | -2.222750 |
| 40 | 1 | 0 | -4.204812 | 2.582495  | -1.995410 |
| 41 | 6 | 0 | -3.764198 | 0.923930  | -3.262907 |
| 42 | 1 | 0 | -2.759066 | 0.748206  | -2.828769 |
| 43 | 1 | 0 | -3.644769 | 1.578297  | -4.152630 |
| 44 | 1 | 0 | -4.188338 | -0.046628 | -3.596030 |
| 45 | 6 | 0 | -6.048004 | 1.905405  | -2.808152 |
| 46 | 1 | 0 | -5.954189 | 2.620105  | -3.653947 |
| 47 | 1 | 0 | -6.695503 | 2.372517  | -2.035349 |
| 48 | 1 | 0 | -6.544502 | 0.986145  | -3.184094 |
| 49 | 6 | 0 | -3.846700 | 0.842490  | 2.800845  |
| 50 | 1 | 0 | -3.410202 | 1.860155  | 2.729819  |
| 51 | 6 | 0 | -4.982790 | 0.942266  | 3.825458  |
| 52 | 1 | 0 | -5.786005 | 1.607073  | 3.441352  |
| 53 | 1 | 0 | -4.602164 | 1.376707  | 4.774650  |
| 54 | 1 | 0 | -5.418734 | -0.054214 | 4.049611  |
| 55 | 6 | 0 | -2.733051 | -0.082391 | 3.306408  |
| 56 | 1 | 0 | -3.120733 | -1.097218 | 3.537103  |
| 57 | 1 | 0 | -2.273350 | 0.336699  | 4.227178  |
| 58 | 1 | 0 | -1.938261 | -0.174392 | 2.538936  |
| 59 | 6 | 0 | -2.136359 | 2.360813  | 0.339621  |
| 60 | 6 | 0 | -1.458214 | 3.725360  | 0.322952  |
| 61 | 1 | 0 | -1.995725 | 4.370872  | 1.024095  |
| 62 | 6 | 0 | -1.379259 | 4.450068  | -1.043701 |
| 63 | 1 | 0 | -2.288706 | 5.046879  | -1.150029 |
| 64 | 6 | 0 | -0.120028 | 5.382397  | -0.909608 |
| 65 | 1 | 0 | -0.428358 | 6.430821  | -0.940848 |
| 66 | 6 | 0 | -1.153297 | 3.611577  | -2.324163 |
| 67 | 1 | 0 | -0.668273 | 2.662000  | -2.087209 |
| 68 | 1 | 0 | -2.091715 | 3.397714  | -2.843889 |
| 69 | 6 | 0 | -0.200832 | 4.477795  | -3.166782 |
| 70 | 1 | 0 | -0.760725 | 5.286620  | -3.655018 |
| 71 | 1 | 0 | 0.303010  | 3.905520  | -3.953294 |
| 72 | 6 | 0 | 0.773866  | 5.057513  | -2.130041 |
| 73 | 1 | 0 | 1.514427  | 4.301213  | -1.854690 |
| 74 | 1 | 0 | 1.309891  | 5.941667  | -2.491454 |
| 75 | 6 | 0 | 0.468531  | 5.088572  | 0.474500  |
| 76 | 1 | 0 | 0.079751  | 5.771466  | 1.234119  |
| 77 | 6 | 0 | 0.020174  | 3.435231  | 2.333697  |
| 78 | 1 | 0 | -0.578526 | 4.228124  | 2.789474  |
| 79 | 1 | 0 | -0.468956 | 2.478075  | 2.496495  |
| 80 | 6 | 0 | 1.415060  | 3.441940  | 2.963895  |

|     |   |   |          |           |           |
|-----|---|---|----------|-----------|-----------|
| 81  | 1 | 0 | 1.250342 | 3.381898  | 4.046166  |
| 82  | 1 | 0 | 1.892087 | 4.413913  | 2.793464  |
| 83  | 6 | 0 | 2.447208 | 2.395617  | 2.537042  |
| 84  | 1 | 0 | 2.604163 | 2.433894  | 1.461751  |
| 85  | 1 | 0 | 3.392556 | 2.597983  | 3.047449  |
| 86  | 6 | 0 | 2.033835 | 0.699609  | 4.370553  |
| 87  | 1 | 0 | 2.766349 | 1.361423  | 4.837822  |
| 88  | 6 | 0 | 1.227809 | -1.737091 | 4.922821  |
| 89  | 1 | 0 | 0.453425 | -1.249429 | 5.525898  |
| 90  | 1 | 0 | 1.619438 | -2.574003 | 5.514347  |
| 91  | 6 | 0 | 0.710675 | -2.245360 | 3.568252  |
| 92  | 1 | 0 | 0.028301 | -1.518093 | 3.128947  |
| 93  | 1 | 0 | 0.182902 | -3.201501 | 3.651571  |
| 94  | 6 | 0 | 1.972243 | -2.351087 | 2.690215  |
| 95  | 1 | 0 | 1.740184 | -2.221089 | 1.629948  |
| 96  | 1 | 0 | 2.430151 | -3.340837 | 2.800774  |
| 97  | 6 | 0 | 2.396985 | -0.783834 | 4.592632  |
| 98  | 1 | 0 | 3.156621 | -0.823984 | 5.377188  |
| 99  | 6 | 0 | 2.975857 | -1.291816 | 3.228148  |
| 100 | 1 | 0 | 3.959901 | -1.746465 | 3.363697  |
| 101 | 6 | 0 | 3.192173 | 0.007779  | 2.419412  |
| 102 | 1 | 0 | 4.121603 | 0.468205  | 2.769500  |
| 103 | 6 | 0 | 3.303736 | -0.147143 | 0.905995  |
| 104 | 6 | 0 | 4.725056 | -0.887768 | -0.880364 |
| 105 | 6 | 0 | 5.135078 | 0.175372  | -1.727850 |
| 106 | 6 | 0 | 5.293436 | -0.073203 | -3.103271 |
| 107 | 1 | 0 | 5.591003 | 0.718669  | -3.777706 |
| 108 | 6 | 0 | 5.060932 | -1.339871 | -3.629618 |
| 109 | 1 | 0 | 5.182749 | -1.512574 | -4.691232 |
| 110 | 6 | 0 | 4.662087 | -2.382994 | -2.800012 |
| 111 | 1 | 0 | 4.473308 | -3.351445 | -3.243927 |
| 112 | 6 | 0 | 4.489919 | -2.179515 | -1.418948 |
| 113 | 6 | 0 | 4.005345 | -3.330893 | -0.543930 |
| 114 | 1 | 0 | 3.968194 | -3.022295 | 0.520771  |
| 115 | 6 | 0 | 4.962914 | -4.527047 | -0.604837 |
| 116 | 1 | 0 | 4.647692 | -5.302853 | 0.125593  |
| 117 | 1 | 0 | 5.993324 | -4.206177 | -0.340622 |
| 118 | 1 | 0 | 4.978461 | -4.987339 | -1.615114 |
| 119 | 6 | 0 | 2.581241 | -3.746311 | -0.930471 |
| 120 | 1 | 0 | 1.906215 | -2.865287 | -0.900233 |
| 121 | 1 | 0 | 2.194409 | -4.502756 | -0.214656 |
| 122 | 1 | 0 | 2.550397 | -4.181106 | -1.952025 |
| 123 | 6 | 0 | 5.380269 | 1.580279  | -1.184345 |
| 124 | 1 | 0 | 5.264541 | 1.598745  | -0.080729 |

|     |   |   |          |          |           |
|-----|---|---|----------|----------|-----------|
| 125 | 6 | 0 | 6.813361 | 2.048336 | -1.466266 |
| 126 | 1 | 0 | 7.542257 | 1.310216 | -1.067901 |
| 127 | 1 | 0 | 7.001870 | 3.021491 | -0.964180 |
| 128 | 1 | 0 | 6.993752 | 2.179961 | -2.553782 |
| 129 | 6 | 0 | 4.356094 | 2.572513 | -1.748808 |
| 130 | 1 | 0 | 4.477245 | 2.698876 | -2.845572 |
| 131 | 1 | 0 | 4.477715 | 3.565031 | -1.264205 |
| 132 | 1 | 0 | 3.324570 | 2.215077 | -1.544599 |
| 133 | 8 | 0 | 2.404021 | 0.152685 | 0.099175  |
| 134 | 1 | 0 | 1.030169 | 0.974301 | 4.690623  |
| 135 | 1 | 0 | 1.556462 | 5.067725 | 0.515327  |

### L3a-Ca(II)

Zero-point correction= 1.01274 a.u.

Thermal correction to Gibbs Free Energy= 0.92994 a.u.

Sum of electronic and zero-point Energies= -2874.36708 a.u.

Sum of electronic and thermal Free Energies= -2874.44988 a.u.

The number of imaginary frequencies 0

Standard orientation

| Center<br>Number | Atomic<br>Number | Atomic<br>Type | Coordinates (Angstroms) |           |           |
|------------------|------------------|----------------|-------------------------|-----------|-----------|
|                  |                  |                | X                       | Y         | Z         |
| 1                | 8                | 0              | 2.357775                | 0.408479  | 0.875875  |
| 2                | 8                | 0              | 0.319114                | 1.676329  | -0.614872 |
| 3                | 8                | 0              | -0.253917               | -1.485451 | -0.667138 |
| 4                | 8                | 0              | -2.413185               | -0.110065 | 0.559456  |
| 5                | 7                | 0              | 4.457784                | 0.775309  | 0.082140  |
| 6                | 1                | 0              | 5.028885                | 1.183935  | -0.648402 |
| 7                | 7                | 0              | 1.304137                | 1.767562  | -1.563564 |
| 8                | 7                | 0              | -4.465733               | -0.745080 | -0.180066 |
| 9                | 1                | 0              | -5.004443               | -1.376648 | -0.762446 |
| 10               | 7                | 0              | -1.157009               | -1.524456 | -1.702912 |
| 11               | 6                | 0              | 5.063174                | -0.183907 | 0.926386  |
| 12               | 6                | 0              | 5.344551                | -1.484275 | 0.430347  |
| 13               | 6                | 0              | 5.932494                | -2.428361 | 1.291743  |
| 14               | 1                | 0              | 6.154393                | -3.429457 | 0.946207  |
| 15               | 6                | 0              | 6.237157                | -2.099310 | 2.608634  |
| 16               | 1                | 0              | 6.686138                | -2.839502 | 3.258511  |
| 17               | 6                | 0              | 5.971265                | -0.822696 | 3.092976  |
| 18               | 1                | 0              | 6.226155                | -0.597876 | 4.120148  |
| 19               | 6                | 0              | 5.391302                | 0.155991  | 2.265241  |
| 20               | 6                | 0              | 5.145487                | 1.557111  | 2.816897  |

|    |   |   |           |           |           |
|----|---|---|-----------|-----------|-----------|
| 21 | 1 | 0 | 4.713436  | 2.216415  | 2.035833  |
| 22 | 6 | 0 | 4.135464  | 1.527213  | 3.969802  |
| 23 | 1 | 0 | 3.190409  | 1.046933  | 3.637765  |
| 24 | 1 | 0 | 3.897122  | 2.562263  | 4.295857  |
| 25 | 1 | 0 | 4.533076  | 0.968216  | 4.843177  |
| 26 | 6 | 0 | 6.458231  | 2.218951  | 3.253556  |
| 27 | 1 | 0 | 6.274014  | 3.273641  | 3.550551  |
| 28 | 1 | 0 | 7.182786  | 2.221304  | 2.411071  |
| 29 | 1 | 0 | 6.914265  | 1.689516  | 4.116655  |
| 30 | 6 | 0 | 5.008956  | -1.883708 | -1.003825 |
| 31 | 1 | 0 | 4.550586  | -1.035362 | -1.552913 |
| 32 | 6 | 0 | 6.272692  | -2.267545 | -1.782398 |
| 33 | 1 | 0 | 7.010668  | -1.437758 | -1.744664 |
| 34 | 1 | 0 | 6.021727  | -2.454745 | -2.848662 |
| 35 | 1 | 0 | 6.742746  | -3.184586 | -1.368354 |
| 36 | 6 | 0 | 3.980311  | -3.019600 | -1.033229 |
| 37 | 1 | 0 | 4.392925  | -3.954049 | -0.598065 |
| 38 | 1 | 0 | 3.676497  | -3.229958 | -2.080668 |
| 39 | 1 | 0 | 3.076730  | -2.727327 | -0.457471 |
| 40 | 6 | 0 | 3.124182  | 0.981139  | 0.086263  |
| 41 | 6 | 0 | 2.677123  | 2.029582  | -0.929688 |
| 42 | 1 | 0 | 3.384738  | 2.034888  | -1.764329 |
| 43 | 6 | 0 | 2.529732  | 3.456654  | -0.409565 |
| 44 | 1 | 0 | 3.494476  | 3.876296  | -0.114912 |
| 45 | 1 | 0 | 1.859639  | 3.468477  | 0.453993  |
| 46 | 6 | 0 | 1.915765  | 4.173247  | -1.631895 |
| 47 | 1 | 0 | 2.732587  | 4.542973  | -2.258717 |
| 48 | 6 | 0 | 0.898131  | 5.292634  | -1.319817 |
| 49 | 1 | 0 | 1.108207  | 5.785314  | -0.364035 |
| 50 | 1 | 0 | 0.950928  | 6.061238  | -2.100052 |
| 51 | 6 | 0 | -0.476358 | 4.602410  | -1.357083 |
| 52 | 1 | 0 | -1.296648 | 5.305638  | -1.536102 |
| 53 | 1 | 0 | -0.669007 | 4.088366  | -0.410570 |
| 54 | 6 | 0 | -0.332523 | 3.562898  | -2.483236 |
| 55 | 1 | 0 | -1.061814 | 2.754479  | -2.423453 |
| 56 | 1 | 0 | -0.452673 | 4.051403  | -3.458618 |
| 57 | 6 | 0 | 1.119432  | 3.072402  | -2.403186 |
| 58 | 1 | 0 | 1.549822  | 2.847645  | -3.380503 |
| 59 | 6 | 0 | 1.376651  | 0.503333  | -2.401583 |
| 60 | 1 | 0 | 2.216019  | 0.636160  | -3.090308 |
| 61 | 1 | 0 | 1.608259  | -0.296066 | -1.699643 |
| 62 | 6 | 0 | 0.130815  | 0.147126  | -3.212963 |
| 63 | 1 | 0 | 0.433044  | -0.670734 | -3.876770 |
| 64 | 1 | 0 | -0.126731 | 0.979338  | -3.878096 |



|     |   |   |           |           |           |
|-----|---|---|-----------|-----------|-----------|
| 65  | 6 | 0 | -1.165513 | -0.226285 | -2.493827 |
| 66  | 1 | 0 | -1.439805 | 0.547862  | -1.780437 |
| 67  | 1 | 0 | -1.958913 | -0.329364 | -3.239419 |
| 68  | 6 | 0 | -0.902192 | -2.788076 | -2.586458 |
| 69  | 1 | 0 | -1.253875 | -2.517055 | -3.583352 |
| 70  | 6 | 0 | 0.551661  | -3.276680 | -2.574208 |
| 71  | 1 | 0 | 1.270059  | -2.471031 | -2.424045 |
| 72  | 1 | 0 | 0.748866  | -3.723896 | -3.556669 |
| 73  | 6 | 0 | 0.609294  | -4.362268 | -1.484800 |
| 74  | 1 | 0 | 0.719124  | -3.886542 | -0.505941 |
| 75  | 1 | 0 | 1.445475  | -5.055469 | -1.624817 |
| 76  | 6 | 0 | -0.760596 | -5.054989 | -1.588865 |
| 77  | 1 | 0 | -1.044903 | -5.588104 | -0.674915 |
| 78  | 1 | 0 | -0.746425 | -5.789363 | -2.403001 |
| 79  | 6 | 0 | -1.754389 | -3.923947 | -1.935049 |
| 80  | 1 | 0 | -2.512659 | -4.267222 | -2.644771 |
| 81  | 6 | 0 | -2.473413 | -3.264306 | -0.738996 |
| 82  | 1 | 0 | -1.883456 | -3.323446 | 0.179417  |
| 83  | 1 | 0 | -3.460286 | -3.694845 | -0.553742 |
| 84  | 6 | 0 | -2.574969 | -1.811617 | -1.199594 |
| 85  | 1 | 0 | -3.215600 | -1.771476 | -2.085878 |
| 86  | 6 | 0 | -3.117329 | -0.807305 | -0.186102 |
| 87  | 6 | 0 | -5.160674 | 0.011183  | 0.791861  |
| 88  | 6 | 0 | -5.343591 | 1.406762  | 0.604841  |
| 89  | 6 | 0 | -5.989511 | 2.148983  | 1.610278  |
| 90  | 1 | 0 | -6.135186 | 3.215660  | 1.502968  |
| 91  | 6 | 0 | -6.459940 | 1.528410  | 2.763155  |
| 92  | 1 | 0 | -6.957382 | 2.114344  | 3.525424  |
| 93  | 6 | 0 | -6.296840 | 0.158134  | 2.939606  |
| 94  | 1 | 0 | -6.673992 | -0.293064 | 3.847957  |
| 95  | 6 | 0 | -5.648550 | -0.621935 | 1.964874  |
| 96  | 6 | 0 | -5.467975 | -2.118878 | 2.198308  |
| 97  | 1 | 0 | -4.955537 | -2.592495 | 1.336043  |
| 98  | 6 | 0 | -6.821149 | -2.826938 | 2.333326  |
| 99  | 1 | 0 | -6.671997 | -3.926585 | 2.390664  |
| 100 | 1 | 0 | -7.454416 | -2.613394 | 1.445603  |
| 101 | 1 | 0 | -7.362450 | -2.500807 | 3.246465  |
| 102 | 6 | 0 | -4.583912 | -2.384320 | 3.422107  |
| 103 | 1 | 0 | -3.606042 | -1.869946 | 3.304842  |
| 104 | 1 | 0 | -4.387474 | -3.473368 | 3.521878  |
| 105 | 1 | 0 | -5.066158 | -2.028213 | 4.356883  |
| 106 | 6 | 0 | -4.868868 | 2.111662  | -0.662855 |
| 107 | 1 | 0 | -4.428037 | 1.383906  | -1.375372 |
| 108 | 6 | 0 | -6.038390 | 2.772464  | -1.403156 |

|     |    |   |           |          |           |
|-----|----|---|-----------|----------|-----------|
| 109 | 1  | 0 | -6.833843 | 2.023745 | -1.606893 |
| 110 | 1  | 0 | -5.691909 | 3.178177 | -2.377923 |
| 111 | 1  | 0 | -6.474024 | 3.607635 | -0.815282 |
| 112 | 6  | 0 | -3.770742 | 3.133726 | -0.348689 |
| 113 | 1  | 0 | -4.150411 | 3.950936 | 0.300222  |
| 114 | 1  | 0 | -3.391259 | 3.583076 | -1.290801 |
| 115 | 1  | 0 | -2.921092 | 2.635728 | 0.164670  |
| 116 | 20 | 0 | -0.037829 | 0.095809 | 1.064883  |

### L3a-Ca(II)-COM

Zero-point correction= 1.14739 a.u.

Thermal correction to Gibbs Free Energy= 1.05059 a.u.

Sum of electronic and zero-point Energies= -6000.39210 a.u.

Sum of electronic and thermal Free Energies= -6000.48890 a.u.

The number of imaginary frequencies 0

Standard orientation

| Center<br>Number | Atomic<br>Number | Atomic<br>Type | Coordinates (Angstroms) |           |           |
|------------------|------------------|----------------|-------------------------|-----------|-----------|
|                  |                  |                | X                       | Y         | Z         |
| 1                | 6                | 0              | -1.855315               | 1.211585  | -1.893857 |
| 2                | 6                | 0              | -2.025725               | 2.048628  | -0.603925 |
| 3                | 6                | 0              | -3.286362               | 2.743605  | -0.758868 |
| 4                | 6                | 0              | -3.840100               | 2.305840  | -1.988439 |
| 5                | 7                | 0              | -2.966732               | 1.398173  | -2.640711 |
| 6                | 8                | 0              | -1.190619               | 2.013508  | 0.290861  |
| 7                | 6                | 0              | -3.986194               | 3.659971  | 0.028712  |
| 8                | 6                | 0              | -5.076884               | 2.742062  | -2.423539 |
| 9                | 8                | 0              | -0.861080               | 0.528626  | -2.135867 |
| 10               | 6                | 0              | -3.195253               | 0.826921  | -3.962219 |
| 11               | 1                | 0              | -3.195845               | 1.617271  | -4.718923 |
| 12               | 1                | 0              | -2.386704               | 0.125986  | -4.169936 |
| 13               | 1                | 0              | -4.152878               | 0.301327  | -3.984758 |
| 14               | 6                | 0              | -5.237439               | 4.112027  | -0.389175 |
| 15               | 6                | 0              | -5.764363               | 3.646503  | -1.597547 |
| 16               | 35               | 0              | -3.232755               | 4.308722  | 1.643966  |
| 17               | 1                | 0              | -5.796315               | 4.819852  | 0.211911  |
| 18               | 1                | 0              | -6.740533               | 4.004084  | -1.910831 |
| 19               | 1                | 0              | -5.507307               | 2.406405  | -3.359837 |
| 20               | 8                | 0              | 2.901045                | 0.619343  | -0.378109 |
| 21               | 8                | 0              | 1.495986                | -1.643724 | -1.365189 |
| 22               | 8                | 0              | 0.956307                | -1.314738 | 1.802590  |
| 23               | 8                | 0              | -1.508614               | -1.035988 | 0.427888  |

|    |   |   |           |           |           |
|----|---|---|-----------|-----------|-----------|
| 24 | 7 | 0 | 5.118686  | 0.620570  | -0.864779 |
| 25 | 1 | 0 | 5.908360  | 0.132023  | -1.269972 |
| 26 | 7 | 0 | 2.748493  | -2.200661 | -1.318762 |
| 27 | 7 | 0 | -3.166876 | -2.387996 | 1.191065  |
| 28 | 1 | 0 | -3.473433 | -3.051932 | 1.893332  |
| 29 | 7 | 0 | 0.444729  | -2.559747 | 2.072511  |
| 30 | 6 | 0 | 5.374924  | 1.817270  | -0.157598 |
| 31 | 6 | 0 | 5.778137  | 1.761090  | 1.201953  |
| 32 | 6 | 0 | 5.994683  | 2.964695  | 1.897159  |
| 33 | 1 | 0 | 6.294580  | 2.956495  | 2.936754  |
| 34 | 6 | 0 | 5.820361  | 4.192940  | 1.266986  |
| 35 | 1 | 0 | 5.987911  | 5.109471  | 1.818062  |
| 36 | 6 | 0 | 5.429053  | 4.248648  | -0.067196 |
| 37 | 1 | 0 | 5.299462  | 5.219719  | -0.526398 |
| 38 | 6 | 0 | 5.204681  | 3.070178  | -0.801682 |
| 39 | 6 | 0 | 4.780406  | 3.163038  | -2.264303 |
| 40 | 1 | 0 | 4.679924  | 2.151007  | -2.708534 |
| 41 | 6 | 0 | 3.408642  | 3.833782  | -2.396854 |
| 42 | 1 | 0 | 2.656880  | 3.288668  | -1.786645 |
| 43 | 1 | 0 | 3.072234  | 3.810504  | -3.455633 |
| 44 | 1 | 0 | 3.441302  | 4.892274  | -2.062379 |
| 45 | 6 | 0 | 5.834541  | 3.893773  | -3.104832 |
| 46 | 1 | 0 | 5.560119  | 3.852483  | -4.180772 |
| 47 | 1 | 0 | 6.824775  | 3.404198  | -2.984262 |
| 48 | 1 | 0 | 5.923818  | 4.960447  | -2.809444 |
| 49 | 6 | 0 | 5.958184  | 0.430228  | 1.926574  |
| 50 | 1 | 0 | 5.773001  | -0.421343 | 1.238926  |
| 51 | 6 | 0 | 7.394420  | 0.263608  | 2.437029  |
| 52 | 1 | 0 | 8.113902  | 0.383873  | 1.598984  |
| 53 | 1 | 0 | 7.532385  | -0.753175 | 2.863547  |
| 54 | 1 | 0 | 7.635247  | 1.007265  | 3.225750  |
| 55 | 6 | 0 | 4.948227  | 0.287965  | 3.070949  |
| 56 | 1 | 0 | 5.120932  | 1.047968  | 3.861989  |
| 57 | 1 | 0 | 5.034246  | -0.719380 | 3.531170  |
| 58 | 1 | 0 | 3.914624  | 0.406703  | 2.681745  |
| 59 | 6 | 0 | 3.881242  | 0.087441  | -0.921211 |
| 60 | 6 | 0 | 3.823628  | -1.195122 | -1.748366 |
| 61 | 1 | 0 | 4.777001  | -1.720432 | -1.634166 |
| 62 | 6 | 0 | 3.536254  | -1.028510 | -3.238541 |
| 63 | 1 | 0 | 4.348106  | -0.502240 | -3.746092 |
| 64 | 1 | 0 | 2.608416  | -0.467061 | -3.375053 |
| 65 | 6 | 0 | 3.400853  | -2.497094 | -3.695753 |
| 66 | 1 | 0 | 4.393369  | -2.861129 | -3.977469 |
| 67 | 6 | 0 | 2.367364  | -2.767287 | -4.810764 |

|     |   |   |           |           |           |
|-----|---|---|-----------|-----------|-----------|
| 68  | 1 | 0 | 2.248222  | -1.906994 | -5.478662 |
| 69  | 1 | 0 | 2.705284  | -3.611085 | -5.424402 |
| 70  | 6 | 0 | 1.072182  | -3.142803 | -4.070311 |
| 71  | 1 | 0 | 0.383790  | -3.721755 | -4.695281 |
| 72  | 1 | 0 | 0.552266  | -2.241547 | -3.732804 |
| 73  | 6 | 0 | 1.566104  | -3.935479 | -2.846338 |
| 74  | 1 | 0 | 0.840465  | -3.969441 | -2.033159 |
| 75  | 1 | 0 | 1.795076  | -4.968650 | -3.137101 |
| 76  | 6 | 0 | 2.892359  | -3.277261 | -2.441518 |
| 77  | 1 | 0 | 3.626164  | -3.991263 | -2.064012 |
| 78  | 6 | 0 | 3.079036  | -2.720747 | 0.069409  |
| 79  | 1 | 0 | 4.104012  | -3.099809 | 0.020719  |
| 80  | 1 | 0 | 3.047154  | -1.850179 | 0.721697  |
| 81  | 6 | 0 | 2.177101  | -3.826595 | 0.619626  |
| 82  | 1 | 0 | 2.677545  | -4.196000 | 1.521873  |
| 83  | 1 | 0 | 2.168781  | -4.674907 | -0.074175 |
| 84  | 6 | 0 | 0.710187  | -3.529636 | 0.933140  |
| 85  | 1 | 0 | 0.216297  | -3.101237 | 0.062790  |
| 86  | 1 | 0 | 0.214781  | -4.465677 | 1.206030  |
| 87  | 6 | 0 | 0.972924  | -3.061917 | 3.455089  |
| 88  | 1 | 0 | 0.978287  | -4.150984 | 3.383912  |
| 89  | 6 | 0 | 2.335738  | -2.477912 | 3.851798  |
| 90  | 1 | 0 | 2.969943  | -2.248956 | 2.995408  |
| 91  | 1 | 0 | 2.847280  | -3.238941 | 4.454750  |
| 92  | 6 | 0 | 2.016686  | -1.249885 | 4.722505  |
| 93  | 1 | 0 | 1.793113  | -0.396273 | 4.076179  |
| 94  | 1 | 0 | 2.847298  | -0.972945 | 5.380608  |
| 95  | 6 | 0 | 0.758354  | -1.673223 | 5.500043  |
| 96  | 1 | 0 | 0.179773  | -0.823658 | 5.879201  |
| 97  | 1 | 0 | 1.041852  | -2.286071 | 6.364205  |
| 98  | 6 | 0 | -0.054612 | -2.531606 | 4.505368  |
| 99  | 1 | 0 | -0.533664 | -3.375681 | 5.010095  |
| 100 | 6 | 0 | -1.127216 | -1.780507 | 3.688303  |
| 101 | 1 | 0 | -0.877176 | -0.724888 | 3.553912  |
| 102 | 1 | 0 | -2.121704 | -1.853321 | 4.134768  |
| 103 | 6 | 0 | -1.064101 | -2.502325 | 2.344002  |
| 104 | 1 | 0 | -1.377094 | -3.541446 | 2.485277  |
| 105 | 6 | 0 | -1.908022 | -1.899055 | 1.223925  |
| 106 | 6 | 0 | -4.144431 | -1.825837 | 0.337491  |
| 107 | 6 | 0 | -4.213186 | -2.230118 | -1.021435 |
| 108 | 6 | 0 | -5.131635 | -1.592993 | -1.874990 |
| 109 | 1 | 0 | -5.204741 | -1.874511 | -2.917085 |
| 110 | 6 | 0 | -5.971971 | -0.592181 | -1.397967 |
| 111 | 1 | 0 | -6.670882 | -0.110311 | -2.069454 |

|     |    |   |           |           |           |
|-----|----|---|-----------|-----------|-----------|
| 112 | 6  | 0 | -5.925943 | -0.215747 | -0.059406 |
| 113 | 1  | 0 | -6.596845 | 0.562021  | 0.280622  |
| 114 | 6  | 0 | -5.026273 | -0.829671 | 0.831057  |
| 115 | 6  | 0 | -5.013251 | -0.408136 | 2.297212  |
| 116 | 1  | 0 | -4.279293 | -1.008294 | 2.872842  |
| 117 | 6  | 0 | -6.375399 | -0.650742 | 2.958413  |
| 118 | 1  | 0 | -6.312249 | -0.445505 | 4.048576  |
| 119 | 1  | 0 | -6.681194 | -1.710743 | 2.826230  |
| 120 | 1  | 0 | -7.160623 | 0.005163  | 2.526556  |
| 121 | 6  | 0 | -4.584798 | 1.053718  | 2.445290  |
| 122 | 1  | 0 | -3.587828 | 1.201933  | 1.980128  |
| 123 | 1  | 0 | -4.502493 | 1.322950  | 3.519989  |
| 124 | 1  | 0 | -5.317149 | 1.737806  | 1.967470  |
| 125 | 6  | 0 | -3.337112 | -3.355394 | -1.563642 |
| 126 | 1  | 0 | -2.693848 | -3.773431 | -0.761293 |
| 127 | 6  | 0 | -4.190828 | -4.522373 | -2.074553 |
| 128 | 1  | 0 | -4.877476 | -4.871965 | -1.273729 |
| 129 | 1  | 0 | -3.538872 | -5.374943 | -2.362348 |
| 130 | 1  | 0 | -4.792247 | -4.229559 | -2.961017 |
| 131 | 6  | 0 | -2.392926 | -2.847705 | -2.657939 |
| 132 | 1  | 0 | -2.955449 | -2.474286 | -3.539285 |
| 133 | 1  | 0 | -1.727022 | -3.670551 | -2.993113 |
| 134 | 1  | 0 | -1.756986 | -2.030326 | -2.260217 |
| 135 | 20 | 0 | 0.575620  | 0.066757  | -0.056242 |

**L3a- Ca(II) -IM1-si**

Zero-point correction= 1.26049 a.u.

Thermal correction to Gibbs Free Energy= 1.15521 a.u.

Sum of electronic and zero-point Energies= -6232.80768 a.u.

Sum of electronic and thermal Free Energies= -6232.91296 a.u.

The number of imaginary frequencies 0

Standard orientation

| Center<br>Number | Atomic<br>Number | Atomic<br>Type | Coordinates (Angstroms) |          |           |
|------------------|------------------|----------------|-------------------------|----------|-----------|
|                  |                  |                | X                       | Y        | Z         |
| 1                | 6                | 0              | -1.650590               | 0.839993 | -2.070397 |
| 2                | 6                | 0              | -1.729163               | 1.754369 | -0.825032 |
| 3                | 6                | 0              | -2.811981               | 2.674912 | -1.092002 |
| 4                | 6                | 0              | -3.359136               | 2.305735 | -2.346439 |
| 5                | 7                | 0              | -2.654258               | 1.204607 | -2.898106 |
| 6                | 8                | 0              | -0.976378               | 1.601348 | 0.129478  |
| 7                | 6                | 0              | -3.361290               | 3.743900 | -0.382624 |

|    |    |   |           |           |           |
|----|----|---|-----------|-----------|-----------|
| 8  | 6  | 0 | -4.442361 | 2.971738  | -2.887451 |
| 9  | 8  | 0 | -0.799326 | -0.036696 | -2.219148 |
| 10 | 6  | 0 | -2.908942 | 0.619279  | -4.209239 |
| 11 | 1  | 0 | -2.598325 | 1.309496  | -4.999703 |
| 12 | 1  | 0 | -2.334515 | -0.304420 | -4.282991 |
| 13 | 1  | 0 | -3.972780 | 0.398028  | -4.317478 |
| 14 | 6  | 0 | -4.452506 | 4.433046  | -0.909238 |
| 15 | 6  | 0 | -4.976724 | 4.037099  | -2.143820 |
| 16 | 35 | 0 | -2.625996 | 4.260624  | 1.288440  |
| 17 | 1  | 0 | -4.891366 | 5.264743  | -0.370197 |
| 18 | 1  | 0 | -5.828874 | 4.577940  | -2.543922 |
| 19 | 1  | 0 | -4.869388 | 2.691972  | -3.843669 |
| 20 | 6  | 0 | 2.137686  | 3.349061  | -1.043440 |
| 21 | 6  | 0 | 1.744198  | 4.349368  | -0.239776 |
| 22 | 8  | 0 | 1.387759  | 5.535445  | -0.826561 |
| 23 | 6  | 0 | 0.569654  | 6.454528  | -0.101280 |
| 24 | 1  | 0 | 0.430047  | 7.311262  | -0.764609 |
| 25 | 6  | 0 | 1.736080  | 4.257980  | 1.261220  |
| 26 | 1  | 0 | -0.411332 | 6.022752  | 0.134038  |
| 27 | 1  | 0 | 2.105016  | 3.279043  | 1.576800  |
| 28 | 1  | 0 | 2.505749  | 2.417920  | -0.628482 |
| 29 | 1  | 0 | 2.138544  | 3.474391  | -2.122404 |
| 30 | 1  | 0 | 2.374091  | 5.028032  | 1.712373  |
| 31 | 1  | 0 | 1.048160  | 6.797598  | 0.822809  |
| 32 | 1  | 0 | 0.727611  | 4.386004  | 1.671882  |
| 33 | 8  | 0 | 2.813903  | -0.208941 | -0.207117 |
| 34 | 8  | 0 | 1.380290  | -2.537208 | -0.847404 |
| 35 | 8  | 0 | 0.387278  | -1.486469 | 2.086307  |
| 36 | 8  | 0 | -1.780521 | -1.348280 | 0.313834  |
| 37 | 7  | 0 | 5.068848  | -0.381473 | -0.385943 |
| 38 | 1  | 0 | 5.861911  | -0.941884 | -0.678786 |
| 39 | 7  | 0 | 2.557203  | -3.140203 | -0.477302 |
| 40 | 7  | 0 | -3.673259 | -2.383466 | 1.015513  |
| 41 | 1  | 0 | -4.151759 | -2.870920 | 1.765046  |
| 42 | 7  | 0 | -0.258010 | -2.621234 | 2.511375  |
| 43 | 6  | 0 | 5.276894  | 1.000682  | -0.164968 |
| 44 | 6  | 0 | 5.192711  | 1.527068  | 1.151360  |
| 45 | 6  | 0 | 5.296693  | 2.917640  | 1.336319  |
| 46 | 1  | 0 | 5.221689  | 3.351306  | 2.324859  |
| 47 | 6  | 0 | 5.496978  | 3.767485  | 0.253345  |
| 48 | 1  | 0 | 5.569124  | 4.835688  | 0.413089  |
| 49 | 6  | 0 | 5.605791  | 3.250936  | -1.033972 |
| 50 | 1  | 0 | 5.757770  | 3.940069  | -1.854021 |
| 51 | 6  | 0 | 5.504255  | 1.866962  | -1.266785 |

|    |   |   |          |           |           |
|----|---|---|----------|-----------|-----------|
| 52 | 6 | 0 | 5.609974 | 1.335074  | -2.693273 |
| 53 | 1 | 0 | 5.559014 | 0.227634  | -2.705378 |
| 54 | 6 | 0 | 4.441743 | 1.827340  | -3.554015 |
| 55 | 1 | 0 | 3.478124 | 1.505195  | -3.105225 |
| 56 | 1 | 0 | 4.504726 | 1.386158  | -4.571906 |
| 57 | 1 | 0 | 4.446726 | 2.933657  | -3.650152 |
| 58 | 6 | 0 | 6.956518 | 1.704735  | -3.327397 |
| 59 | 1 | 0 | 7.061768 | 1.209569  | -4.316418 |
| 60 | 1 | 0 | 7.790748 | 1.358320  | -2.680299 |
| 61 | 1 | 0 | 7.049348 | 2.800944  | -3.477736 |
| 62 | 6 | 0 | 5.007484 | 0.618725  | 2.363723  |
| 63 | 1 | 0 | 4.986946 | -0.447316 | 2.054887  |
| 64 | 6 | 0 | 6.181473 | 0.752875  | 3.341607  |
| 65 | 1 | 0 | 7.141410 | 0.564526  | 2.814606  |
| 66 | 1 | 0 | 6.085859 | 0.004664  | 4.157656  |
| 67 | 1 | 0 | 6.216276 | 1.763860  | 3.799588  |
| 68 | 6 | 0 | 3.674604 | 0.895668  | 3.068402  |
| 69 | 1 | 0 | 3.641424 | 1.924357  | 3.484943  |
| 70 | 1 | 0 | 3.533716 | 0.177302  | 3.903210  |
| 71 | 1 | 0 | 2.831128 | 0.767729  | 2.358163  |
| 72 | 6 | 0 | 3.819510 | -0.884414 | -0.474407 |
| 73 | 6 | 0 | 3.776216 | -2.333744 | -0.949242 |
| 74 | 1 | 0 | 4.651601 | -2.855714 | -0.549768 |
| 75 | 6 | 0 | 3.732629 | -2.532506 | -2.463743 |
| 76 | 1 | 0 | 4.659701 | -2.204157 | -2.938883 |
| 77 | 1 | 0 | 2.898199 | -1.966035 | -2.885842 |
| 78 | 6 | 0 | 3.518295 | -4.056250 | -2.577758 |
| 79 | 1 | 0 | 4.499254 | -4.540299 | -2.594406 |
| 80 | 6 | 0 | 2.639600 | -4.526930 | -3.757159 |
| 81 | 1 | 0 | 2.711782 | -3.853401 | -4.618206 |
| 82 | 1 | 0 | 2.974079 | -5.516942 | -4.089465 |
| 83 | 6 | 0 | 1.217252 | -4.620049 | -3.178830 |
| 84 | 1 | 0 | 0.570121 | -5.287472 | -3.757938 |
| 85 | 1 | 0 | 0.751806 | -3.630110 | -3.153644 |
| 86 | 6 | 0 | 1.439910 | -5.117203 | -1.739074 |
| 87 | 1 | 0 | 0.601266 | -4.905602 | -1.075469 |
| 88 | 1 | 0 | 1.603377 | -6.202396 | -1.739869 |
| 89 | 6 | 0 | 2.752362 | -4.465895 | -1.280844 |
| 90 | 1 | 0 | 3.344083 | -5.110754 | -0.629533 |
| 91 | 6 | 0 | 2.634596 | -3.333005 | 1.027932  |
| 92 | 1 | 0 | 3.620698 | -3.759268 | 1.232917  |
| 93 | 1 | 0 | 2.580352 | -2.333627 | 1.455900  |
| 94 | 6 | 0 | 1.575221 | -4.240558 | 1.656075  |
| 95 | 1 | 0 | 1.905214 | -4.410661 | 2.687099  |

|     |   |   |           |           |           |
|-----|---|---|-----------|-----------|-----------|
| 96  | 1 | 0 | 1.605258  | -5.226317 | 1.178116  |
| 97  | 6 | 0 | 0.104496  | -3.820385 | 1.652530  |
| 98  | 1 | 0 | -0.216707 | -3.566989 | 0.643532  |
| 99  | 1 | 0 | -0.496396 | -4.655865 | 2.022205  |
| 100 | 6 | 0 | 0.012667  | -2.845351 | 4.034910  |
| 101 | 1 | 0 | -0.036272 | -3.925721 | 4.180783  |
| 102 | 6 | 0 | 1.330174  | -2.230508 | 4.529007  |
| 103 | 1 | 0 | 2.097550  | -2.183944 | 3.755655  |
| 104 | 1 | 0 | 1.702153  | -2.873825 | 5.336428  |
| 105 | 6 | 0 | 0.950820  | -0.849768 | 5.093295  |
| 106 | 1 | 0 | 0.883989  | -0.128560 | 4.272878  |
| 107 | 1 | 0 | 1.682052  | -0.476207 | 5.817870  |
| 108 | 6 | 0 | -0.436324 | -1.079228 | 5.717392  |
| 109 | 1 | 0 | -1.015518 | -0.156466 | 5.833933  |
| 110 | 1 | 0 | -0.328551 | -1.524396 | 6.713731  |
| 111 | 6 | 0 | -1.133080 | -2.086450 | 4.775968  |
| 112 | 1 | 0 | -1.744513 | -2.798342 | 5.338081  |
| 113 | 6 | 0 | -2.003453 | -1.467989 | 3.662663  |
| 114 | 1 | 0 | -1.658364 | -0.470515 | 3.377074  |
| 115 | 1 | 0 | -3.058312 | -1.409333 | 3.940280  |
| 116 | 6 | 0 | -1.782476 | -2.440520 | 2.505413  |
| 117 | 1 | 0 | -2.200166 | -3.415879 | 2.775112  |
| 118 | 6 | 0 | -2.384476 | -2.006898 | 1.172642  |
| 119 | 6 | 0 | -4.451869 | -1.850603 | -0.039563 |
| 120 | 6 | 0 | -4.344509 | -2.398310 | -1.345219 |
| 121 | 6 | 0 | -5.021619 | -1.768612 | -2.405329 |
| 122 | 1 | 0 | -4.950185 | -2.153814 | -3.413793 |
| 123 | 6 | 0 | -5.798735 | -0.636324 | -2.181804 |
| 124 | 1 | 0 | -6.308377 | -0.160305 | -3.009568 |
| 125 | 6 | 0 | -5.932282 | -0.118736 | -0.897934 |
| 126 | 1 | 0 | -6.547328 | 0.760605  | -0.758908 |
| 127 | 6 | 0 | -5.276960 | -0.718749 | 0.192808  |
| 128 | 6 | 0 | -5.453615 | -0.131715 | 1.589970  |
| 129 | 1 | 0 | -4.922510 | -0.745450 | 2.345088  |
| 130 | 6 | 0 | -6.928679 | -0.125898 | 2.010082  |
| 131 | 1 | 0 | -7.021520 | 0.187931  | 3.071941  |
| 132 | 1 | 0 | -7.356943 | -1.146913 | 1.916284  |
| 133 | 1 | 0 | -7.527034 | 0.573062  | 1.388369  |
| 134 | 6 | 0 | -4.851675 | 1.273174  | 1.676025  |
| 135 | 1 | 0 | -3.773202 | 1.234653  | 1.415712  |
| 136 | 1 | 0 | -4.937600 | 1.664970  | 2.712083  |
| 137 | 1 | 0 | -5.369678 | 1.976772  | 0.991116  |
| 138 | 6 | 0 | -3.532891 | -3.662310 | -1.615606 |
| 139 | 1 | 0 | -3.093645 | -4.054468 | -0.674416 |



|     |    |   |           |           |           |
|-----|----|---|-----------|-----------|-----------|
| 140 | 6  | 0 | -4.422477 | -4.782954 | -2.167601 |
| 141 | 1  | 0 | -5.274202 | -4.969546 | -1.479110 |
| 142 | 1  | 0 | -3.840517 | -5.725572 | -2.254008 |
| 143 | 1  | 0 | -4.821988 | -4.527901 | -3.171747 |
| 144 | 6  | 0 | -2.360992 | -3.380951 | -2.561627 |
| 145 | 1  | 0 | -2.714466 | -3.047100 | -3.559744 |
| 146 | 1  | 0 | -1.755441 | -4.301735 | -2.696813 |
| 147 | 1  | 0 | -1.703577 | -2.597606 | -2.131628 |
| 148 | 20 | 0 | 0.443899  | -0.542341 | -0.053203 |

### L3a-Ca(II)-TS1-si

Zero-point correction= 1.26080 a.u.

Thermal correction to Gibbs Free Energy= 1.15595 a.u.

Sum of electronic and zero-point Energies= -6232.80092 a.u.

Sum of electronic and thermal Free Energies= -6232.90578 a.u.

The number of imaginary frequencies 1

Standard orientation

| Center<br>Number | Atomic<br>Number | Atomic<br>Type | Coordinates (Angstroms) |          |           |
|------------------|------------------|----------------|-------------------------|----------|-----------|
|                  |                  |                | X                       | Y        | Z         |
| 1                | 6                | 0              | -0.888586               | 1.229499 | -1.832219 |
| 2                | 6                | 0              | -1.072042               | 2.047323 | -0.531317 |
| 3                | 6                | 0              | -2.365128               | 2.772300 | -0.783874 |
| 4                | 6                | 0              | -2.772912               | 2.474805 | -2.099513 |
| 5                | 7                | 0              | -1.861235               | 1.576183 | -2.705659 |
| 6                | 8                | 0              | -0.738958               | 1.476054 | 0.565062  |
| 7                | 6                | 0              | -3.182919               | 3.572539 | -0.004555 |
| 8                | 6                | 0              | -3.943387               | 2.976813 | -2.648199 |
| 9                | 8                | 0              | -0.012953               | 0.368076 | -1.981222 |
| 10               | 6                | 0              | -2.012342               | 1.013742 | -4.039967 |
| 11               | 1                | 0              | -1.904120               | 1.797798 | -4.795674 |
| 12               | 1                | 0              | -1.233066               | 0.264180 | -4.179625 |
| 13               | 1                | 0              | -2.994889               | 0.546119 | -4.145500 |
| 14               | 6                | 0              | -4.375259               | 4.093055 | -0.520062 |
| 15               | 6                | 0              | -4.738020               | 3.795770 | -1.833942 |
| 16               | 35               | 0              | -2.715469               | 3.946980 | 1.811604  |
| 17               | 1                | 0              | -5.013634               | 4.713213 | 0.099179  |
| 18               | 1                | 0              | -5.664688               | 4.199590 | -2.230330 |
| 19               | 1                | 0              | -4.246157               | 2.736255 | -3.661569 |
| 20               | 6                | 0              | 0.323212                | 3.342050 | -1.044604 |
| 21               | 6                | 0              | 0.331942                | 4.325416 | -0.036293 |
| 22               | 8                | 0              | -0.250902               | 5.462784 | -0.328302 |

|    |   |   |           |           |           |
|----|---|---|-----------|-----------|-----------|
| 23 | 6 | 0 | -0.357742 | 6.543438  | 0.632702  |
| 24 | 1 | 0 | -0.735509 | 7.388609  | 0.058383  |
| 25 | 6 | 0 | 0.893915  | 4.003322  | 1.300352  |
| 26 | 1 | 0 | -1.072823 | 6.268584  | 1.410587  |
| 27 | 1 | 0 | 0.472746  | 3.024410  | 1.585235  |
| 28 | 1 | 0 | 1.135593  | 2.625242  | -0.976777 |
| 29 | 1 | 0 | 0.088374  | 3.686401  | -2.049163 |
| 30 | 1 | 0 | 1.978455  | 3.866286  | 1.219574  |
| 31 | 1 | 0 | 0.620677  | 6.779283  | 1.055343  |
| 32 | 1 | 0 | 0.685940  | 4.742921  | 2.072091  |
| 33 | 8 | 0 | 2.875958  | -0.177827 | 0.357240  |
| 34 | 8 | 0 | 1.648184  | -2.352057 | -0.885193 |
| 35 | 8 | 0 | 0.327271  | -1.926491 | 2.161567  |
| 36 | 8 | 0 | -1.586003 | -1.621132 | 0.112714  |
| 37 | 7 | 0 | 5.016091  | 0.120547  | -0.322795 |
| 38 | 1 | 0 | 5.805624  | -0.255711 | -0.836622 |
| 39 | 7 | 0 | 2.822626  | -2.955737 | -0.503125 |
| 40 | 7 | 0 | -3.544839 | -2.703278 | 0.475143  |
| 41 | 1 | 0 | -4.096670 | -3.273003 | 1.107162  |
| 42 | 7 | 0 | -0.280800 | -3.151515 | 2.268928  |
| 43 | 6 | 0 | 4.983629  | 1.517353  | -0.091671 |
| 44 | 6 | 0 | 5.044341  | 2.020289  | 1.236174  |
| 45 | 6 | 0 | 4.944931  | 3.408024  | 1.444016  |
| 46 | 1 | 0 | 4.981779  | 3.821806  | 2.443027  |
| 47 | 6 | 0 | 4.786638  | 4.280274  | 0.372541  |
| 48 | 1 | 0 | 4.702430  | 5.344451  | 0.552107  |
| 49 | 6 | 0 | 4.727190  | 3.791159  | -0.927687 |
| 50 | 1 | 0 | 4.592307  | 4.496825  | -1.736774 |
| 51 | 6 | 0 | 4.833319  | 2.412248  | -1.185621 |
| 52 | 6 | 0 | 4.753755  | 1.913332  | -2.626327 |
| 53 | 1 | 0 | 4.910762  | 0.818092  | -2.673795 |
| 54 | 6 | 0 | 3.366690  | 2.171942  | -3.224357 |
| 55 | 1 | 0 | 2.594865  | 1.642453  | -2.627487 |
| 56 | 1 | 0 | 3.317021  | 1.779648  | -4.262679 |
| 57 | 1 | 0 | 3.127988  | 3.256414  | -3.246276 |
| 58 | 6 | 0 | 5.853419  | 2.535700  | -3.495332 |
| 59 | 1 | 0 | 5.856885  | 2.063811  | -4.501413 |
| 60 | 1 | 0 | 6.849229  | 2.363739  | -3.033459 |
| 61 | 1 | 0 | 5.701038  | 3.627626  | -3.626280 |
| 62 | 6 | 0 | 5.213584  | 1.094342  | 2.437391  |
| 63 | 1 | 0 | 5.294398  | 0.037166  | 2.109832  |
| 64 | 6 | 0 | 6.509190  | 1.404058  | 3.197123  |
| 65 | 1 | 0 | 7.378149  | 1.351120  | 2.506679  |
| 66 | 1 | 0 | 6.666704  | 0.657017  | 4.004379  |

|     |   |   |           |           |           |
|-----|---|---|-----------|-----------|-----------|
| 67  | 1 | 0 | 6.479450  | 2.413517  | 3.659188  |
| 68  | 6 | 0 | 3.998553  | 1.172524  | 3.371124  |
| 69  | 1 | 0 | 3.914880  | 2.173910  | 3.843865  |
| 70  | 1 | 0 | 4.085415  | 0.411777  | 4.176409  |
| 71  | 1 | 0 | 3.063516  | 0.967813  | 2.807759  |
| 72  | 6 | 0 | 3.894576  | -0.622423 | -0.190861 |
| 73  | 6 | 0 | 4.022991  | -2.034186 | -0.761775 |
| 74  | 1 | 0 | 4.890170  | -2.512403 | -0.292281 |
| 75  | 6 | 0 | 4.171288  | -2.094270 | -2.283790 |
| 76  | 1 | 0 | 5.130592  | -1.687067 | -2.611965 |
| 77  | 1 | 0 | 3.366441  | -1.520656 | -2.752297 |
| 78  | 6 | 0 | 4.049025  | -3.599617 | -2.577792 |
| 79  | 1 | 0 | 5.045027  | -4.048530 | -2.521607 |
| 80  | 6 | 0 | 3.340566  | -3.956175 | -3.902669 |
| 81  | 1 | 0 | 3.514763  | -3.202087 | -4.678139 |
| 82  | 1 | 0 | 3.727550  | -4.909972 | -4.281337 |
| 83  | 6 | 0 | 1.858557  | -4.105107 | -3.520396 |
| 84  | 1 | 0 | 1.290526  | -4.695729 | -4.247111 |
| 85  | 1 | 0 | 1.386501  | -3.120819 | -3.437416 |
| 86  | 6 | 0 | 1.908326  | -4.764637 | -2.131450 |
| 87  | 1 | 0 | 0.990923  | -4.626540 | -1.560128 |
| 88  | 1 | 0 | 2.086331  | -5.842448 | -2.235632 |
| 89  | 6 | 0 | 3.145090  | -4.167223 | -1.443565 |
| 90  | 1 | 0 | 3.670450  | -4.886369 | -0.814280 |
| 91  | 6 | 0 | 2.791612  | -3.368968 | 0.959784  |
| 92  | 1 | 0 | 3.788657  | -3.756409 | 1.186351  |
| 93  | 1 | 0 | 2.627073  | -2.455301 | 1.526819  |
| 94  | 6 | 0 | 1.762280  | -4.439115 | 1.335671  |
| 95  | 1 | 0 | 2.017339  | -4.752875 | 2.353744  |
| 96  | 1 | 0 | 1.919315  | -5.328881 | 0.715257  |
| 97  | 6 | 0 | 0.265281  | -4.131865 | 1.247377  |
| 98  | 1 | 0 | 0.020888  | -3.708351 | 0.274890  |
| 99  | 1 | 0 | -0.293185 | -5.061467 | 1.387708  |
| 100 | 6 | 0 | -0.169907 | -3.664156 | 3.740080  |
| 101 | 1 | 0 | -0.175488 | -4.752758 | 3.669104  |
| 102 | 6 | 0 | 1.049328  | -3.115742 | 4.495806  |
| 103 | 1 | 0 | 1.895178  | -2.897725 | 3.842659  |
| 104 | 1 | 0 | 1.361364  | -3.891214 | 5.206916  |
| 105 | 6 | 0 | 0.537800  | -1.880086 | 5.257420  |
| 106 | 1 | 0 | 0.531704  | -1.017065 | 4.584777  |
| 107 | 1 | 0 | 1.160915  | -1.633617 | 6.124081  |
| 108 | 6 | 0 | -0.899719 | -2.262980 | 5.652205  |
| 109 | 1 | 0 | -1.535510 | -1.394932 | 5.858643  |
| 110 | 1 | 0 | -0.886019 | -2.879396 | 6.559070  |

|     |    |   |           |           |           |
|-----|----|---|-----------|-----------|-----------|
| 111 | 6  | 0 | -1.430842 | -3.102264 | 4.467799  |
| 112 | 1  | 0 | -2.054629 | -3.930204 | 4.817338  |
| 113 | 6  | 0 | -2.214646 | -2.321482 | 3.392219  |
| 114 | 1  | 0 | -1.910399 | -1.272421 | 3.344497  |
| 115 | 1  | 0 | -3.294600 | -2.368190 | 3.549083  |
| 116 | 6  | 0 | -1.802119 | -3.036823 | 2.105587  |
| 117 | 1  | 0 | -2.183753 | -4.063729 | 2.129572  |
| 118 | 6  | 0 | -2.274065 | -2.380747 | 0.806993  |
| 119 | 6  | 0 | -4.224733 | -1.999215 | -0.547855 |
| 120 | 6  | 0 | -3.990469 | -2.324925 | -1.910899 |
| 121 | 6  | 0 | -4.638815 | -1.577474 | -2.910687 |
| 122 | 1  | 0 | -4.479449 | -1.798650 | -3.957636 |
| 123 | 6  | 0 | -5.496476 | -0.534200 | -2.578185 |
| 124 | 1  | 0 | -5.980785 | 0.035321  | -3.360960 |
| 125 | 6  | 0 | -5.733138 | -0.218393 | -1.244837 |
| 126 | 1  | 0 | -6.401380 | 0.602718  | -1.021505 |
| 127 | 6  | 0 | -5.111769 | -0.942263 | -0.210854 |
| 128 | 6  | 0 | -5.384780 | -0.557836 | 1.240030  |
| 129 | 1  | 0 | -4.846758 | -1.232729 | 1.934695  |
| 130 | 6  | 0 | -6.873579 | -0.692763 | 1.580992  |
| 131 | 1  | 0 | -7.033680 | -0.519152 | 2.666801  |
| 132 | 1  | 0 | -7.228383 | -1.718463 | 1.342178  |
| 133 | 1  | 0 | -7.488951 | 0.039927  | 1.017483  |
| 134 | 6  | 0 | -4.876296 | 0.855568  | 1.538709  |
| 135 | 1  | 0 | -3.792851 | 0.921539  | 1.304612  |
| 136 | 1  | 0 | -5.008107 | 1.090979  | 2.616311  |
| 137 | 1  | 0 | -5.424599 | 1.616239  | 0.944581  |
| 138 | 6  | 0 | -3.066006 | -3.470315 | -2.313937 |
| 139 | 1  | 0 | -2.652630 | -3.976659 | -1.417109 |
| 140 | 6  | 0 | -3.827224 | -4.548061 | -3.095088 |
| 141 | 1  | 0 | -4.698590 | -4.904014 | -2.504587 |
| 142 | 1  | 0 | -3.165004 | -5.419436 | -3.287513 |
| 143 | 1  | 0 | -4.189017 | -4.164068 | -4.072055 |
| 144 | 6  | 0 | -1.865968 | -2.956008 | -3.118249 |
| 145 | 1  | 0 | -2.184144 | -2.518203 | -4.087709 |
| 146 | 1  | 0 | -1.165297 | -3.791724 | -3.327393 |
| 147 | 1  | 0 | -1.317336 | -2.183881 | -2.539273 |
| 148 | 20 | 0 | 0.543554  | -0.588415 | 0.257644  |

---

**L3a-Ca(II)-IM2-si**

Zero-point correction= 1.26257 a.u.

Thermal correction to Gibbs Free Energy= 1.15789 a.u.

Sum of electronic and zero-point Energies= -6232.80267 a.u.

Sum of electronic and thermal Free Energies= -6232.90736 a.u.

The number of imaginary frequencies 0

Standard orientation

---

| Center<br>Number | Atomic<br>Number | Atomic<br>Type | Coordinates (Angstroms) |           |           |
|------------------|------------------|----------------|-------------------------|-----------|-----------|
|                  |                  |                | X                       | Y         | Z         |
| 1                | 6                | 0              | -0.655990               | 1.308567  | -1.931916 |
| 2                | 6                | 0              | -0.686507               | 2.204139  | -0.653430 |
| 3                | 6                | 0              | -1.951791               | 3.022068  | -0.919924 |
| 4                | 6                | 0              | -2.416209               | 2.720015  | -2.213406 |
| 5                | 7                | 0              | -1.604778               | 1.718855  | -2.802771 |
| 6                | 8                | 0              | -0.567729               | 1.496655  | 0.461077  |
| 7                | 6                | 0              | -2.689383               | 3.909560  | -0.158231 |
| 8                | 6                | 0              | -3.550305               | 3.302735  | -2.761273 |
| 9                | 8                | 0              | 0.101052                | 0.337045  | -2.058233 |
| 10               | 6                | 0              | -1.872230               | 1.089855  | -4.088500 |
| 11               | 1                | 0              | -1.774392               | 1.822955  | -4.894577 |
| 12               | 1                | 0              | -1.143700               | 0.291349  | -4.231294 |
| 13               | 1                | 0              | -2.881699               | 0.669073  | -4.104479 |
| 14               | 6                | 0              | -3.841357               | 4.519978  | -0.669569 |
| 15               | 6                | 0              | -4.254283               | 4.216989  | -1.966314 |
| 16               | 35               | 0              | -2.184821               | 4.285299  | 1.653161  |
| 17               | 1                | 0              | -4.410827               | 5.211000  | -0.058180 |
| 18               | 1                | 0              | -5.149030               | 4.688505  | -2.361215 |
| 19               | 1                | 0              | -3.893478               | 3.053033  | -3.759305 |
| 20               | 6                | 0              | 0.659963                | 3.176797  | -0.944082 |
| 21               | 6                | 0              | 0.900459                | 4.089330  | 0.159528  |
| 22               | 8                | 0              | 0.657258                | 5.335680  | -0.077727 |
| 23               | 6                | 0              | 0.807971                | 6.370676  | 0.939208  |
| 24               | 1                | 0              | 0.660839                | 7.304784  | 0.399973  |
| 25               | 6                | 0              | 1.321256                | 3.539416  | 1.457170  |
| 26               | 1                | 0              | 0.033032                | 6.238699  | 1.695028  |
| 27               | 1                | 0              | 0.615795                | 2.700405  | 1.635783  |
| 28               | 1                | 0              | 1.463634                | 2.438798  | -0.992127 |
| 29               | 1                | 0              | 0.544701                | 3.702796  | -1.892895 |
| 30               | 1                | 0              | 2.302430                | 3.065463  | 1.344763  |
| 31               | 1                | 0              | 1.808508                | 6.327187  | 1.372042  |
| 32               | 1                | 0              | 1.342658                | 4.248602  | 2.282965  |
| 33               | 8                | 0              | 2.746174                | -0.371862 | 0.323511  |
| 34               | 8                | 0              | 1.376421                | -2.562151 | -0.800738 |
| 35               | 8                | 0              | 0.058282                | -1.869495 | 2.204540  |
| 36               | 8                | 0              | -1.768963               | -1.615579 | 0.069168  |
| 37               | 7                | 0              | 4.913598                | -0.294944 | -0.339999 |

---

|    |   |   |           |           |           |
|----|---|---|-----------|-----------|-----------|
| 38 | 1 | 0 | 5.674159  | -0.766468 | -0.817658 |
| 39 | 7 | 0 | 2.507607  | -3.210162 | -0.367338 |
| 40 | 7 | 0 | -3.850662 | -2.387910 | 0.517738  |
| 41 | 1 | 0 | -4.467011 | -2.825513 | 1.193761  |
| 42 | 7 | 0 | -0.632704 | -3.044803 | 2.363852  |
| 43 | 6 | 0 | 5.004238  | 1.109271  | -0.184217 |
| 44 | 6 | 0 | 5.113627  | 1.674233  | 1.115089  |
| 45 | 6 | 0 | 5.144792  | 3.074420  | 1.248235  |
| 46 | 1 | 0 | 5.220834  | 3.535741  | 2.223854  |
| 47 | 6 | 0 | 5.061625  | 3.898980  | 0.131443  |
| 48 | 1 | 0 | 5.074864  | 4.974400  | 0.253906  |
| 49 | 6 | 0 | 4.957538  | 3.348663  | -1.141307 |
| 50 | 1 | 0 | 4.888921  | 4.019445  | -1.987544 |
| 51 | 6 | 0 | 4.937489  | 1.954008  | -1.325142 |
| 52 | 6 | 0 | 4.822037  | 1.387785  | -2.738227 |
| 53 | 1 | 0 | 4.873153  | 0.281727  | -2.724554 |
| 54 | 6 | 0 | 3.472136  | 1.744406  | -3.370022 |
| 55 | 1 | 0 | 2.646870  | 1.323819  | -2.758737 |
| 56 | 1 | 0 | 3.395714  | 1.302969  | -4.386697 |
| 57 | 1 | 0 | 3.338226  | 2.843731  | -3.452886 |
| 58 | 6 | 0 | 5.984548  | 1.854070  | -3.623119 |
| 59 | 1 | 0 | 5.951227  | 1.331509  | -4.603331 |
| 60 | 1 | 0 | 6.954845  | 1.611674  | -3.138988 |
| 61 | 1 | 0 | 5.940162  | 2.947252  | -3.812044 |
| 62 | 6 | 0 | 5.195728  | 0.801435  | 2.364267  |
| 63 | 1 | 0 | 5.183143  | -0.274511 | 2.092903  |
| 64 | 6 | 0 | 6.511559  | 1.033846  | 3.116535  |
| 65 | 1 | 0 | 7.374186  | 0.871540  | 2.435104  |
| 66 | 1 | 0 | 6.601151  | 0.316485  | 3.960232  |
| 67 | 1 | 0 | 6.568819  | 2.063287  | 3.528907  |
| 68 | 6 | 0 | 3.989544  | 1.035028  | 3.283249  |
| 69 | 1 | 0 | 3.985424  | 2.067404  | 3.692168  |
| 70 | 1 | 0 | 4.014885  | 0.321517  | 4.134885  |
| 71 | 1 | 0 | 3.042279  | 0.868073  | 2.727976  |
| 72 | 6 | 0 | 3.731029  | -0.931432 | -0.180933 |
| 73 | 6 | 0 | 3.760647  | -2.380050 | -0.671357 |
| 74 | 1 | 0 | 4.597142  | -2.886142 | -0.176071 |
| 75 | 6 | 0 | 3.901766  | -2.533882 | -2.188107 |
| 76 | 1 | 0 | 4.884546  | -2.207333 | -2.536331 |
| 77 | 1 | 0 | 3.134456  | -1.936565 | -2.688900 |
| 78 | 6 | 0 | 3.684138  | -4.042761 | -2.399274 |
| 79 | 1 | 0 | 4.651532  | -4.548469 | -2.326607 |
| 80 | 6 | 0 | 2.941427  | -4.428066 | -3.697716 |
| 81 | 1 | 0 | 3.142119  | -3.722021 | -4.511108 |

|     |   |   |           |           |           |
|-----|---|---|-----------|-----------|-----------|
| 82  | 1 | 0 | 3.277408  | -5.416688 | -4.033132 |
| 83  | 6 | 0 | 1.457808  | -4.486699 | -3.295636 |
| 84  | 1 | 0 | 0.856797  | -5.091093 | -3.983531 |
| 85  | 1 | 0 | 1.030504  | -3.479492 | -3.263793 |
| 86  | 6 | 0 | 1.492775  | -5.070384 | -1.872921 |
| 87  | 1 | 0 | 0.586776  | -4.863759 | -1.304075 |
| 88  | 1 | 0 | 1.623419  | -6.159019 | -1.919092 |
| 89  | 6 | 0 | 2.761618  | -4.493095 | -1.227856 |
| 90  | 1 | 0 | 3.254074  | -5.195918 | -0.555044 |
| 91  | 6 | 0 | 2.437922  | -3.527233 | 1.117650  |
| 92  | 1 | 0 | 3.408120  | -3.956812 | 1.381712  |
| 93  | 1 | 0 | 2.322654  | -2.571241 | 1.624173  |
| 94  | 6 | 0 | 1.340786  | -4.507149 | 1.544908  |
| 95  | 1 | 0 | 1.563634  | -4.768771 | 2.584976  |
| 96  | 1 | 0 | 1.450655  | -5.443084 | 0.985304  |
| 97  | 6 | 0 | -0.133411 | -4.115847 | 1.411443  |
| 98  | 1 | 0 | -0.338219 | -3.737917 | 0.411835  |
| 99  | 1 | 0 | -0.750292 | -4.999553 | 1.597693  |
| 100 | 6 | 0 | -0.582846 | -3.484938 | 3.861512  |
| 101 | 1 | 0 | -0.654552 | -4.573425 | 3.846044  |
| 102 | 6 | 0 | 0.653031  | -2.974219 | 4.616487  |
| 103 | 1 | 0 | 1.524249  | -2.844052 | 3.973306  |
| 104 | 1 | 0 | 0.900470  | -3.729212 | 5.373747  |
| 105 | 6 | 0 | 0.204459  | -1.671140 | 5.301543  |
| 106 | 1 | 0 | 0.265228  | -0.846427 | 4.585064  |
| 107 | 1 | 0 | 0.824508  | -1.417643 | 6.168294  |
| 108 | 6 | 0 | -1.261675 | -1.943734 | 5.682545  |
| 109 | 1 | 0 | -1.846114 | -1.028479 | 5.827203  |
| 110 | 1 | 0 | -1.305013 | -2.508827 | 6.621409  |
| 111 | 6 | 0 | -1.820167 | -2.812858 | 4.532388  |
| 112 | 1 | 0 | -2.497066 | -3.583757 | 4.912238  |
| 113 | 6 | 0 | -2.538878 | -2.046458 | 3.402918  |
| 114 | 1 | 0 | -2.180716 | -1.017210 | 3.312906  |
| 115 | 1 | 0 | -3.622701 | -2.031812 | 3.538469  |
| 116 | 6 | 0 | -2.141112 | -2.842493 | 2.159291  |
| 117 | 1 | 0 | -2.588422 | -3.840973 | 2.215530  |
| 118 | 6 | 0 | -2.543329 | -2.218900 | 0.822518  |
| 119 | 6 | 0 | -4.439757 | -1.644501 | -0.534493 |
| 120 | 6 | 0 | -4.264733 | -2.058896 | -1.882757 |
| 121 | 6 | 0 | -4.800652 | -1.266198 | -2.913804 |
| 122 | 1 | 0 | -4.680583 | -1.551927 | -3.950331 |
| 123 | 6 | 0 | -5.492080 | -0.094273 | -2.626900 |
| 124 | 1 | 0 | -5.890221 | 0.507834  | -3.433480 |
| 125 | 6 | 0 | -5.669526 | 0.310827  | -1.308682 |

|     |    |   |           |           |           |
|-----|----|---|-----------|-----------|-----------|
| 126 | 1  | 0 | -6.205018 | 1.232157  | -1.121316 |
| 127 | 6  | 0 | -5.155257 | -0.451548 | -0.244247 |
| 128 | 6  | 0 | -5.346320 | 0.040495  | 1.187198  |
| 129 | 1  | 0 | -4.904932 | -0.672061 | 1.911049  |
| 130 | 6  | 0 | -6.833173 | 0.150846  | 1.545607  |
| 131 | 1  | 0 | -6.948394 | 0.402947  | 2.621671  |
| 132 | 1  | 0 | -7.342802 | -0.819903 | 1.364621  |
| 133 | 1  | 0 | -7.339356 | 0.938211  | 0.948153  |
| 134 | 6  | 0 | -4.626446 | 1.373863  | 1.410466  |
| 135 | 1  | 0 | -3.552096 | 1.270706  | 1.149078  |
| 136 | 1  | 0 | -4.690795 | 1.669962  | 2.479274  |
| 137 | 1  | 0 | -5.075052 | 2.181898  | 0.795897  |
| 138 | 6  | 0 | -3.516255 | -3.340943 | -2.236745 |
| 139 | 1  | 0 | -3.171742 | -3.860538 | -1.318644 |
| 140 | 6  | 0 | -4.430301 | -4.331776 | -2.967929 |
| 141 | 1  | 0 | -5.340339 | -4.531191 | -2.362189 |
| 142 | 1  | 0 | -3.901783 | -5.297175 | -3.120615 |
| 143 | 1  | 0 | -4.739843 | -3.943837 | -3.961269 |
| 144 | 6  | 0 | -2.261019 | -3.038989 | -3.065848 |
| 145 | 1  | 0 | -2.522097 | -2.612120 | -4.057139 |
| 146 | 1  | 0 | -1.681082 | -3.971894 | -3.230106 |
| 147 | 1  | 0 | -1.609068 | -2.318178 | -2.529214 |
| 148 | 20 | 0 | 0.387776  | -0.669699 | 0.213847  |

---

### L3a-Ca(II)-TS2-si

Zero-point correction= 1.25926 a.u.

Thermal correction to Gibbs Free Energy= 1.15635 a.u.

Sum of electronic and zero-point Energies= -6232.80262 a.u.

Sum of electronic and thermal Free Energies= -6232.90553 a.u.

The number of imaginary frequencies 1

Standard orientation

---

| Center<br>Number | Atomic<br>Number | Atomic<br>Type | Coordinates (Angstroms) |          |           |
|------------------|------------------|----------------|-------------------------|----------|-----------|
|                  |                  |                | X                       | Y        | Z         |
| 1                | 6                | 0              | -1.022913               | 1.330989 | -2.053056 |
| 2                | 6                | 0              | -0.675265               | 2.327771 | -0.920381 |
| 3                | 6                | 0              | -1.890396               | 3.247265 | -0.960528 |
| 4                | 6                | 0              | -2.643722               | 2.925141 | -2.103968 |
| 5                | 7                | 0              | -2.078238               | 1.799108 | -2.754364 |
| 6                | 8                | 0              | -0.406002               | 1.662822 | 0.246285  |
| 7                | 6                | 0              | -2.368268               | 4.240614 | -0.124328 |
| 8                | 6                | 0              | -3.804954               | 3.597882 | -2.456059 |



|    |    |   |           |           |           |
|----|----|---|-----------|-----------|-----------|
| 9  | 8  | 0 | -0.411212 | 0.270572  | -2.238941 |
| 10 | 6  | 0 | -2.644954 | 1.152212  | -3.929480 |
| 11 | 1  | 0 | -2.528320 | 1.796411  | -4.806388 |
| 12 | 1  | 0 | -2.113182 | 0.214454  | -4.092263 |
| 13 | 1  | 0 | -3.706972 | 0.947716  | -3.773780 |
| 14 | 6  | 0 | -3.540136 | 4.940407  | -0.438979 |
| 15 | 6  | 0 | -4.236949 | 4.622755  | -1.603953 |
| 16 | 35 | 0 | -1.489522 | 4.636925  | 1.529746  |
| 17 | 1  | 0 | -3.906046 | 5.714123  | 0.226525  |
| 18 | 1  | 0 | -5.143712 | 5.169698  | -1.844058 |
| 19 | 1  | 0 | -4.368823 | 3.335623  | -3.344559 |
| 20 | 6  | 0 | 0.653535  | 3.081326  | -1.503001 |
| 21 | 6  | 0 | 1.346583  | 3.763696  | -0.393124 |
| 22 | 8  | 0 | 1.252274  | 5.070732  | -0.392667 |
| 23 | 6  | 0 | 1.880547  | 5.840805  | 0.661877  |
| 24 | 1  | 0 | 1.813149  | 6.877266  | 0.333876  |
| 25 | 6  | 0 | 1.811473  | 2.953322  | 0.661566  |
| 26 | 1  | 0 | 1.333951  | 5.705631  | 1.596923  |
| 27 | 1  | 0 | 0.662377  | 2.329344  | 0.761427  |
| 28 | 1  | 0 | 1.287680  | 2.276197  | -1.882807 |
| 29 | 1  | 0 | 0.382429  | 3.761344  | -2.311042 |
| 30 | 1  | 0 | 2.357845  | 2.063729  | 0.342581  |
| 31 | 1  | 0 | 2.925056  | 5.540229  | 0.774300  |
| 32 | 1  | 0 | 2.197835  | 3.419281  | 1.563775  |
| 33 | 8  | 0 | 2.573176  | -0.328388 | -0.276715 |
| 34 | 8  | 0 | 1.095822  | -2.570348 | -1.132553 |
| 35 | 8  | 0 | 0.148385  | -1.940228 | 1.965015  |
| 36 | 8  | 0 | -1.935216 | -1.594951 | 0.066547  |
| 37 | 7  | 0 | 4.822362  | -0.614039 | -0.326049 |
| 38 | 1  | 0 | 5.607679  | -1.183801 | -0.620758 |
| 39 | 7  | 0 | 2.257267  | -3.248962 | -0.870600 |
| 40 | 7  | 0 | -3.976222 | -2.119882 | 0.900455  |
| 41 | 1  | 0 | -4.503032 | -2.487066 | 1.685596  |
| 42 | 7  | 0 | -0.559012 | -3.100795 | 2.173175  |
| 43 | 6  | 0 | 5.086106  | 0.709926  | 0.097463  |
| 44 | 6  | 0 | 4.969272  | 1.050017  | 1.470936  |
| 45 | 6  | 0 | 5.156023  | 2.389164  | 1.858875  |
| 46 | 1  | 0 | 5.062496  | 2.682948  | 2.896020  |
| 47 | 6  | 0 | 5.456278  | 3.368466  | 0.917518  |
| 48 | 1  | 0 | 5.591549  | 4.395025  | 1.232706  |
| 49 | 6  | 0 | 5.584139  | 3.034474  | -0.426701 |
| 50 | 1  | 0 | 5.816010  | 3.820560  | -1.133033 |
| 51 | 6  | 0 | 5.411288  | 1.707069  | -0.859331 |
| 52 | 6  | 0 | 5.553049  | 1.375489  | -2.341731 |

|    |   |   |          |           |           |
|----|---|---|----------|-----------|-----------|
| 53 | 1 | 0 | 5.418221 | 0.288582  | -2.515638 |
| 54 | 6 | 0 | 4.473913 | 2.080677  | -3.169763 |
| 55 | 1 | 0 | 3.467290 | 1.793363  | -2.801284 |
| 56 | 1 | 0 | 4.546701 | 1.773749  | -4.235152 |
| 57 | 1 | 0 | 4.575167 | 3.185153  | -3.114362 |
| 58 | 6 | 0 | 6.955778 | 1.719663  | -2.857297 |
| 59 | 1 | 0 | 7.074492 | 1.367083  | -3.904381 |
| 60 | 1 | 0 | 7.725471 | 1.213278  | -2.236160 |
| 61 | 1 | 0 | 7.140415 | 2.814500  | -2.836541 |
| 62 | 6 | 0 | 4.644284 | -0.000736 | 2.528283  |
| 63 | 1 | 0 | 4.573170 | -1.009339 | 2.070555  |
| 64 | 6 | 0 | 5.754775 | -0.091752 | 3.582023  |
| 65 | 1 | 0 | 6.734676 | -0.272815 | 3.090601  |
| 66 | 1 | 0 | 5.556632 | -0.939711 | 4.272527  |
| 67 | 1 | 0 | 5.821603 | 0.838174  | 4.185103  |
| 68 | 6 | 0 | 3.287358 | 0.278206  | 3.184245  |
| 69 | 1 | 0 | 3.286303 | 1.251534  | 3.718717  |
| 70 | 1 | 0 | 3.052388 | -0.521693 | 3.917135  |
| 71 | 1 | 0 | 2.484316 | 0.289493  | 2.417076  |
| 72 | 6 | 0 | 3.560274 | -1.029194 | -0.556361 |
| 73 | 6 | 0 | 3.488428 | -2.401292 | -1.223269 |
| 74 | 1 | 0 | 4.357138 | -2.985079 | -0.903954 |
| 75 | 6 | 0 | 3.437038 | -2.371891 | -2.749881 |
| 76 | 1 | 0 | 4.371053 | -1.997741 | -3.175661 |
| 77 | 1 | 0 | 2.615459 | -1.728484 | -3.075715 |
| 78 | 6 | 0 | 3.179603 | -3.853627 | -3.096663 |
| 79 | 1 | 0 | 4.144583 | -4.357452 | -3.204337 |
| 80 | 6 | 0 | 2.273389 | -4.104070 | -4.323194 |
| 81 | 1 | 0 | 2.360170 | -3.305419 | -5.068154 |
| 82 | 1 | 0 | 2.570918 | -5.039491 | -4.812264 |
| 83 | 6 | 0 | 0.854496 | -4.243779 | -3.744924 |
| 84 | 1 | 0 | 0.177389 | -4.786907 | -4.413171 |
| 85 | 1 | 0 | 0.422905 | -3.257703 | -3.548707 |
| 86 | 6 | 0 | 1.077932 | -4.975373 | -2.410253 |
| 87 | 1 | 0 | 0.250236 | -4.854797 | -1.711588 |
| 88 | 1 | 0 | 1.213262 | -6.049556 | -2.590438 |
| 89 | 6 | 0 | 2.412634 | -4.440679 | -1.870234 |
| 90 | 1 | 0 | 2.990115 | -5.195023 | -1.334140 |
| 91 | 6 | 0 | 2.329775 | -3.674399 | 0.585644  |
| 92 | 1 | 0 | 3.296912 | -4.169835 | 0.714341  |
| 93 | 1 | 0 | 2.319639 | -2.751533 | 1.164415  |
| 94 | 6 | 0 | 1.227332 | -4.621923 | 1.064968  |
| 95 | 1 | 0 | 1.544913 | -4.971692 | 2.053772  |
| 96 | 1 | 0 | 1.220355 | -5.516543 | 0.432018  |

|     |   |   |           |           |           |
|-----|---|---|-----------|-----------|-----------|
| 97  | 6 | 0 | -0.229008 | -4.150480 | 1.125776  |
| 98  | 1 | 0 | -0.532511 | -3.721609 | 0.173702  |
| 99  | 1 | 0 | -0.862175 | -5.013135 | 1.352769  |
| 100 | 6 | 0 | -0.326965 | -3.615807 | 3.632572  |
| 101 | 1 | 0 | -0.407526 | -4.701880 | 3.570816  |
| 102 | 6 | 0 | 0.997807  | -3.144566 | 4.248798  |
| 103 | 1 | 0 | 1.770677  | -2.962588 | 3.501734  |
| 104 | 1 | 0 | 1.348660  | -3.943654 | 4.913948  |
| 105 | 6 | 0 | 0.640812  | -1.894915 | 5.073531  |
| 106 | 1 | 0 | 0.596525  | -1.023152 | 4.412813  |
| 107 | 1 | 0 | 1.371579  | -1.687900 | 5.862642  |
| 108 | 6 | 0 | -0.758151 | -2.212589 | 5.627677  |
| 109 | 1 | 0 | -1.316836 | -1.319891 | 5.930036  |
| 110 | 1 | 0 | -0.673714 | -2.858291 | 6.510140  |
| 111 | 6 | 0 | -1.464627 | -2.982853 | 4.490573  |
| 112 | 1 | 0 | -2.113701 | -3.770357 | 4.884887  |
| 113 | 6 | 0 | -2.282237 | -2.118769 | 3.511130  |
| 114 | 1 | 0 | -1.893987 | -1.098430 | 3.441455  |
| 115 | 1 | 0 | -3.340137 | -2.073394 | 3.781082  |
| 116 | 6 | 0 | -2.071126 | -2.840993 | 2.180049  |
| 117 | 1 | 0 | -2.546428 | -3.826920 | 2.229113  |
| 118 | 6 | 0 | -2.626404 | -2.119542 | 0.951411  |
| 119 | 6 | 0 | -4.663435 | -1.320244 | -0.044675 |
| 120 | 6 | 0 | -4.817374 | -1.775433 | -1.382074 |
| 121 | 6 | 0 | -5.465960 | -0.944470 | -2.313411 |
| 122 | 1 | 0 | -5.594279 | -1.259530 | -3.340392 |
| 123 | 6 | 0 | -5.951189 | 0.304197  | -1.938766 |
| 124 | 1 | 0 | -6.441684 | 0.933376  | -2.670392 |
| 125 | 6 | 0 | -5.799236 | 0.752912  | -0.631583 |
| 126 | 1 | 0 | -6.177212 | 1.734398  | -0.377371 |
| 127 | 6 | 0 | -5.160131 | -0.044608 | 0.334971  |
| 128 | 6 | 0 | -4.985361 | 0.494352  | 1.751701  |
| 129 | 1 | 0 | -4.485889 | -0.253222 | 2.399511  |
| 130 | 6 | 0 | -6.339717 | 0.791895  | 2.405668  |
| 131 | 1 | 0 | -6.195045 | 1.073469  | 3.470861  |
| 132 | 1 | 0 | -6.985928 | -0.111598 | 2.374704  |
| 133 | 1 | 0 | -6.864346 | 1.626455  | 1.894483  |
| 134 | 6 | 0 | -4.087152 | 1.735867  | 1.759905  |
| 135 | 1 | 0 | -3.107577 | 1.497423  | 1.294437  |
| 136 | 1 | 0 | -3.898137 | 2.065428  | 2.803793  |
| 137 | 1 | 0 | -4.556956 | 2.576349  | 1.207797  |
| 138 | 6 | 0 | -4.298811 | -3.139571 | -1.829111 |
| 139 | 1 | 0 | -3.836857 | -3.681785 | -0.978560 |
| 140 | 6 | 0 | -5.441379 | -4.031562 | -2.329123 |

|     |    |   |           |           |           |
|-----|----|---|-----------|-----------|-----------|
| 141 | 1  | 0 | -6.226045 | -4.121467 | -1.547432 |
| 142 | 1  | 0 | -5.059680 | -5.051434 | -2.550443 |
| 143 | 1  | 0 | -5.901567 | -3.624400 | -3.254054 |
| 144 | 6  | 0 | -3.208054 | -2.993851 | -2.898472 |
| 145 | 1  | 0 | -3.614792 | -2.558484 | -3.835607 |
| 146 | 1  | 0 | -2.770172 | -3.987233 | -3.135313 |
| 147 | 1  | 0 | -2.390343 | -2.340403 | -2.527971 |
| 148 | 20 | 0 | 0.237913  | -0.696329 | -0.029449 |

**L3a-Ca(II)-IM3-si**

Zero-point correction= 1.26501 a.u.

Thermal correction to Gibbs Free Energy= 1.16719 a.u.

Sum of electronic and zero-point Energies= -6232.82385 a.u.

Sum of electronic and thermal Free Energies= -6232.92167 a.u.

The number of imaginary frequencies 0

Standard orientation

| Center<br>Number | Atomic<br>Number | Atomic<br>Type | Coordinates (Angstroms) |           |           |
|------------------|------------------|----------------|-------------------------|-----------|-----------|
|                  |                  |                | X                       | Y         | Z         |
| 1                | 6                | 0              | -1.286796               | 1.185182  | -1.941674 |
| 2                | 6                | 0              | -1.258757               | 2.275918  | -0.849061 |
| 3                | 6                | 0              | -2.654839               | 2.855647  | -0.972637 |
| 4                | 6                | 0              | -3.230811               | 2.342063  | -2.148199 |
| 5                | 7                | 0              | -2.368468               | 1.374421  | -2.723145 |
| 6                | 8                | 0              | -0.964004               | 1.629676  | 0.387966  |
| 7                | 6                | 0              | -3.417843               | 3.701648  | -0.185544 |
| 8                | 6                | 0              | -4.494594               | 2.703161  | -2.588795 |
| 9                | 8                | 0              | -0.418090               | 0.311685  | -2.066331 |
| 10               | 6                | 0              | -2.673916               | 0.596293  | -3.915602 |
| 11               | 1                | 0              | -2.686901               | 1.248555  | -4.793852 |
| 12               | 1                | 0              | -1.900533               | -0.162523 | -4.034656 |
| 13               | 1                | 0              | -3.649421               | 0.115766  | -3.809957 |
| 14               | 6                | 0              | -4.702533               | 4.084581  | -0.590688 |
| 15               | 6                | 0              | -5.218995               | 3.598377  | -1.791124 |
| 16               | 35               | 0              | -2.784773               | 4.285697  | 1.521966  |
| 17               | 1                | 0              | -5.295084               | 4.744194  | 0.033423  |
| 18               | 1                | 0              | -6.214338               | 3.902376  | -2.100426 |
| 19               | 1                | 0              | -4.916904               | 2.296949  | -3.501108 |
| 20               | 6                | 0              | -0.088845               | 3.235540  | -1.260220 |
| 21               | 6                | 0              | 0.328607                | 4.215256  | -0.194452 |
| 22               | 8                | 0              | -0.322358               | 5.394689  | -0.326620 |
| 23               | 6                | 0              | -0.021999               | 6.426916  | 0.614089  |

|    |   |   |           |           |           |
|----|---|---|-----------|-----------|-----------|
| 24 | 1 | 0 | -0.627787 | 7.285363  | 0.320372  |
| 25 | 6 | 0 | 1.230558  | 3.901824  | 0.756247  |
| 26 | 1 | 0 | -0.287640 | 6.121044  | 1.631799  |
| 27 | 1 | 0 | -0.608585 | 2.313723  | 0.994575  |
| 28 | 1 | 0 | 0.764349  | 2.592517  | -1.492760 |
| 29 | 1 | 0 | -0.371808 | 3.770382  | -2.171184 |
| 30 | 1 | 0 | 1.731196  | 2.940384  | 0.715987  |
| 31 | 1 | 0 | 1.041396  | 6.691172  | 0.575704  |
| 32 | 1 | 0 | 1.534475  | 4.587292  | 1.538450  |
| 33 | 8 | 0 | 2.793886  | 0.038571  | -0.240311 |
| 34 | 8 | 0 | 1.578299  | -2.327703 | -1.110374 |
| 35 | 8 | 0 | 0.643998  | -1.811779 | 2.005114  |
| 36 | 8 | 0 | -1.557533 | -1.667962 | 0.233443  |
| 37 | 7 | 0 | 5.041925  | 0.128990  | -0.477502 |
| 38 | 1 | 0 | 5.886144  | -0.290689 | -0.851119 |
| 39 | 7 | 0 | 2.824256  | -2.851184 | -0.871178 |
| 40 | 7 | 0 | -3.417225 | -2.736501 | 0.963290  |
| 41 | 1 | 0 | -3.861433 | -3.264608 | 1.706486  |
| 42 | 7 | 0 | 0.099123  | -3.048657 | 2.250123  |
| 43 | 6 | 0 | 5.096574  | 1.476913  | -0.049071 |
| 44 | 6 | 0 | 5.061851  | 1.778800  | 1.338021  |
| 45 | 6 | 0 | 4.993234  | 3.124939  | 1.740137  |
| 46 | 1 | 0 | 4.952489  | 3.387415  | 2.789047  |
| 47 | 6 | 0 | 4.965340  | 4.149106  | 0.798852  |
| 48 | 1 | 0 | 4.903721  | 5.179325  | 1.125307  |
| 49 | 6 | 0 | 5.011252  | 3.855201  | -0.560143 |
| 50 | 1 | 0 | 4.977450  | 4.674615  | -1.265757 |
| 51 | 6 | 0 | 5.084627  | 2.523537  | -1.007650 |
| 52 | 6 | 0 | 5.105900  | 2.232780  | -2.505037 |
| 53 | 1 | 0 | 5.227600  | 1.145980  | -2.690961 |
| 54 | 6 | 0 | 3.781620  | 2.639119  | -3.160402 |
| 55 | 1 | 0 | 2.939591  | 2.097914  | -2.679031 |
| 56 | 1 | 0 | 3.788662  | 2.368316  | -4.238101 |
| 57 | 1 | 0 | 3.603479  | 3.731890  | -3.072578 |
| 58 | 6 | 0 | 6.294566  | 2.916166  | -3.192207 |
| 59 | 1 | 0 | 6.361590  | 2.588816  | -4.251864 |
| 60 | 1 | 0 | 7.242817  | 2.633530  | -2.686648 |
| 61 | 1 | 0 | 6.195107  | 4.021946  | -3.177195 |
| 62 | 6 | 0 | 5.085820  | 0.677628  | 2.394387  |
| 63 | 1 | 0 | 5.182322  | -0.319805 | 1.916980  |
| 64 | 6 | 0 | 6.298102  | 0.823055  | 3.322336  |
| 65 | 1 | 0 | 7.234660  | 0.854966  | 2.725122  |
| 66 | 1 | 0 | 6.359238  | -0.048034 | 4.009555  |
| 67 | 1 | 0 | 6.232507  | 1.745522  | 3.937052  |

|     |   |   |           |           |           |
|-----|---|---|-----------|-----------|-----------|
| 68  | 6 | 0 | 3.780108  | 0.652235  | 3.197421  |
| 69  | 1 | 0 | 3.644762  | 1.586600  | 3.782145  |
| 70  | 1 | 0 | 3.786246  | -0.205192 | 3.903632  |
| 71  | 1 | 0 | 2.913087  | 0.530618  | 2.514548  |
| 72  | 6 | 0 | 3.852025  | -0.492852 | -0.609519 |
| 73  | 6 | 0 | 3.934322  | -1.864833 | -1.268855 |
| 74  | 1 | 0 | 4.876017  | -2.337866 | -0.974107 |
| 75  | 6 | 0 | 3.835009  | -1.860357 | -2.793794 |
| 76  | 1 | 0 | 4.703246  | -1.379006 | -3.250232 |
| 77  | 1 | 0 | 2.931679  | -1.326897 | -3.101564 |
| 78  | 6 | 0 | 3.757421  | -3.367525 | -3.115551 |
| 79  | 1 | 0 | 4.776617  | -3.744660 | -3.241514 |
| 80  | 6 | 0 | 2.863261  | -3.756572 | -4.313636 |
| 81  | 1 | 0 | 2.822272  | -2.965527 | -5.070447 |
| 82  | 1 | 0 | 3.273263  | -4.650390 | -4.799221 |
| 83  | 6 | 0 | 1.490307  | -4.078076 | -3.697882 |
| 84  | 1 | 0 | 0.881789  | -4.724079 | -4.339594 |
| 85  | 1 | 0 | 0.929925  | -3.156796 | -3.511570 |
| 86  | 6 | 0 | 1.839752  | -4.743108 | -2.354264 |
| 87  | 1 | 0 | 1.020573  | -4.713702 | -1.636026 |
| 88  | 1 | 0 | 2.108777  | -5.794780 | -2.515964 |
| 89  | 6 | 0 | 3.105296  | -4.027758 | -1.860843 |
| 90  | 1 | 0 | 3.791073  | -4.691243 | -1.331972 |
| 91  | 6 | 0 | 2.989202  | -3.244453 | 0.587438  |
| 92  | 1 | 0 | 4.016709  | -3.603590 | 0.695590  |
| 93  | 1 | 0 | 2.869251  | -2.325714 | 1.158909  |
| 94  | 6 | 0 | 2.041508  | -4.329157 | 1.106992  |
| 95  | 1 | 0 | 2.430969  | -4.616707 | 2.090024  |
| 96  | 1 | 0 | 2.142482  | -5.225604 | 0.484928  |
| 97  | 6 | 0 | 0.536852  | -4.061370 | 1.206396  |
| 98  | 1 | 0 | 0.152380  | -3.691783 | 0.257797  |
| 99  | 1 | 0 | 0.032551  | -4.998144 | 1.459503  |
| 100 | 6 | 0 | 0.434255  | -3.495494 | 3.711744  |
| 101 | 1 | 0 | 0.477602  | -4.584834 | 3.677711  |
| 102 | 6 | 0 | 1.714425  | -2.858178 | 4.269819  |
| 103 | 1 | 0 | 2.442408  | -2.620817 | 3.493788  |
| 104 | 1 | 0 | 2.169322  | -3.588660 | 4.950595  |
| 105 | 6 | 0 | 1.244876  | -1.624933 | 5.061892  |
| 106 | 1 | 0 | 1.088946  | -0.788821 | 4.372860  |
| 107 | 1 | 0 | 1.969483  | -1.310875 | 5.820734  |
| 108 | 6 | 0 | -0.094984 | -2.073369 | 5.670908  |
| 109 | 1 | 0 | -0.742532 | -1.236658 | 5.955426  |
| 110 | 1 | 0 | 0.086530  | -2.666798 | 6.575078  |
| 111 | 6 | 0 | -0.742203 | -2.967062 | 4.589753  |

|     |    |   |           |           |           |
|-----|----|---|-----------|-----------|-----------|
| 112 | 1  | 0 | -1.278665 | -3.809115 | 5.036830  |
| 113 | 6  | 0 | -1.692057 | -2.246668 | 3.611525  |
| 114 | 1  | 0 | -1.435086 | -1.190059 | 3.494970  |
| 115 | 1  | 0 | -2.739067 | -2.322161 | 3.914388  |
| 116 | 6  | 0 | -1.433460 | -2.987935 | 2.300520  |
| 117 | 1  | 0 | -1.769676 | -4.024528 | 2.404739  |
| 118 | 6  | 0 | -2.115764 | -2.394294 | 1.068361  |
| 119 | 6  | 0 | -4.247849 | -2.142336 | -0.017332 |
| 120 | 6  | 0 | -4.217038 | -2.616974 | -1.356546 |
| 121 | 6  | 0 | -5.020641 | -1.983720 | -2.321755 |
| 122 | 1  | 0 | -5.015530 | -2.316936 | -3.351222 |
| 123 | 6  | 0 | -5.833539 | -0.908342 | -1.978949 |
| 124 | 1  | 0 | -6.438926 | -0.427380 | -2.736525 |
| 125 | 6  | 0 | -5.865679 | -0.442451 | -0.669108 |
| 126 | 1  | 0 | -6.501269 | 0.402282  | -0.439060 |
| 127 | 6  | 0 | -5.082039 | -1.047030 | 0.330712  |
| 128 | 6  | 0 | -5.117498 | -0.487895 | 1.749622  |
| 129 | 1  | 0 | -4.459971 | -1.075851 | 2.421183  |
| 130 | 6  | 0 | -6.526943 | -0.573045 | 2.347007  |
| 131 | 1  | 0 | -6.509290 | -0.255945 | 3.411776  |
| 132 | 1  | 0 | -6.895455 | -1.620415 | 2.307214  |
| 133 | 1  | 0 | -7.240621 | 0.079798  | 1.801653  |
| 134 | 6  | 0 | -4.590852 | 0.950529  | 1.785718  |
| 135 | 1  | 0 | -3.570000 | 0.989364  | 1.350478  |
| 136 | 1  | 0 | -4.529521 | 1.309194  | 2.835335  |
| 137 | 1  | 0 | -5.253693 | 1.638128  | 1.219645  |
| 138 | 6  | 0 | -3.334396 | -3.791001 | -1.770952 |
| 139 | 1  | 0 | -2.793495 | -4.204525 | -0.894745 |
| 140 | 6  | 0 | -4.171234 | -4.945743 | -2.334699 |
| 141 | 1  | 0 | -4.951083 | -5.245612 | -1.602352 |
| 142 | 1  | 0 | -3.523932 | -5.828713 | -2.525014 |
| 143 | 1  | 0 | -4.663885 | -4.664512 | -3.289147 |
| 144 | 6  | 0 | -2.264922 | -3.347944 | -2.776968 |
| 145 | 1  | 0 | -2.721154 | -3.006325 | -3.730092 |
| 146 | 1  | 0 | -1.580737 | -4.193825 | -3.000432 |
| 147 | 1  | 0 | -1.659886 | -2.519034 | -2.353370 |
| 148 | 20 | 0 | 0.511975  | -0.570708 | 0.016829  |

---

**L3a-Ca(11)-IM1-re**

Zero-point correction= 1.25973 a.u.

Thermal correction to Gibbs Free Energy= 1.15652 a.u.

Sum of electronic and zero-point Energies= -6232.81267 a.u.

Sum of electronic and thermal Free Energies= -6232.91588 a.u.

The number of imaginary frequencies 0

Standard orientation

| Center<br>Number | Atomic<br>Number | Atomic<br>Type | Coordinates (Angstroms) |           |           |
|------------------|------------------|----------------|-------------------------|-----------|-----------|
|                  |                  |                | X                       | Y         | Z         |
| 1                | 6                | 0              | -0.369937               | -3.957875 | -2.136836 |
| 2                | 6                | 0              | -0.745975               | -4.652391 | -1.044936 |
| 3                | 8                | 0              | -1.749153               | -5.564331 | -1.197631 |
| 4                | 6                | 0              | -2.287822               | -6.238443 | -0.057343 |
| 5                | 6                | 0              | -0.117838               | -4.479872 | 0.309387  |
| 6                | 1                | 0              | 0.454616                | -3.257977 | -2.091921 |
| 7                | 1                | 0              | -0.840004               | -4.135980 | -3.099303 |
| 8                | 1                | 0              | -3.033722               | -6.930866 | -0.453390 |
| 9                | 1                | 0              | -2.781042               | -5.540789 | 0.629318  |
| 10               | 1                | 0              | -1.524410               | -6.808917 | 0.482832  |
| 11               | 1                | 0              | 0.325937                | -5.416726 | 0.666600  |
| 12               | 1                | 0              | -0.853019               | -4.157882 | 1.055211  |
| 13               | 1                | 0              | 0.666747                | -3.722031 | 0.263576  |
| 14               | 6                | 0              | -1.520343               | -0.959540 | -2.256307 |
| 15               | 6                | 0              | -1.898661               | -1.443452 | -0.838865 |
| 16               | 6                | 0              | -3.226993               | -2.014147 | -0.971068 |
| 17               | 6                | 0              | -3.599538               | -1.865251 | -2.329682 |
| 18               | 7                | 0              | -2.558352               | -1.255714 | -3.072738 |
| 19               | 8                | 0              | -1.163465               | -1.245079 | 0.121422  |
| 20               | 8                | 0              | -0.466993               | -0.376630 | -2.520271 |
| 21               | 6                | 0              | -2.574172               | -1.054490 | -4.516439 |
| 22               | 6                | 0              | -4.118857               | -2.598413 | -0.073684 |
| 23               | 6                | 0              | -4.839710               | -2.267506 | -2.790798 |
| 24               | 1                | 0              | -2.503701               | -2.018156 | -5.030713 |
| 25               | 1                | 0              | -1.716713               | -0.435245 | -4.781945 |
| 26               | 1                | 0              | -3.495555               | -0.550890 | -4.816886 |
| 27               | 6                | 0              | -5.721329               | -2.832555 | -1.855569 |
| 28               | 6                | 0              | -5.378181               | -3.006562 | -0.511513 |
| 29               | 1                | 0              | -5.128589               | -2.153045 | -3.829100 |
| 30               | 1                | 0              | -6.704621               | -3.151783 | -2.187645 |
| 31               | 1                | 0              | -6.081667               | -3.455358 | 0.180087  |
| 32               | 35               | 0              | -3.611771               | -2.870159 | 1.734591  |
| 33               | 8                | 0              | 1.357218                | 2.730751  | -0.284376 |
| 34               | 8                | 0              | -1.296223               | 1.766149  | -0.226857 |
| 35               | 8                | 0              | 1.199755                | 0.364981  | 1.922014  |
| 36               | 7                | 0              | -2.860776               | 3.356538  | 0.193244  |
| 37               | 1                | 0              | -3.075650               | 4.338949  | 0.319676  |
| 38               | 7                | 0              | 0.817852                | 3.763611  | 0.437283  |



|    |   |   |           |           |           |
|----|---|---|-----------|-----------|-----------|
| 39 | 7 | 0 | 4.979198  | -1.146773 | 0.555697  |
| 40 | 1 | 0 | 5.562438  | -1.415763 | 1.340085  |
| 41 | 7 | 0 | 2.382758  | 0.606410  | 2.575527  |
| 42 | 6 | 0 | -3.939319 | 2.445897  | 0.121172  |
| 43 | 6 | 0 | -4.311293 | 1.700554  | 1.269228  |
| 44 | 6 | 0 | -5.333344 | 0.740773  | 1.155575  |
| 45 | 1 | 0 | -5.634007 | 0.149065  | 2.009987  |
| 46 | 6 | 0 | -5.983050 | 0.532819  | -0.057415 |
| 47 | 1 | 0 | -6.766424 | -0.210665 | -0.128341 |
| 48 | 6 | 0 | -5.636897 | 1.282698  | -1.177292 |
| 49 | 1 | 0 | -6.165678 | 1.100326  | -2.103348 |
| 50 | 6 | 0 | -4.623485 | 2.255904  | -1.106885 |
| 51 | 6 | 0 | -4.284374 | 3.083546  | -2.342633 |
| 52 | 1 | 0 | -3.494649 | 3.828099  | -2.112386 |
| 53 | 6 | 0 | -3.730791 | 2.199323  | -3.463313 |
| 54 | 1 | 0 | -2.836253 | 1.650383  | -3.101269 |
| 55 | 1 | 0 | -3.419889 | 2.824882  | -4.327251 |
| 56 | 1 | 0 | -4.491697 | 1.470726  | -3.812849 |
| 57 | 6 | 0 | -5.499335 | 3.885935  | -2.823367 |
| 58 | 1 | 0 | -5.205857 | 4.563071  | -3.654002 |
| 59 | 1 | 0 | -5.894605 | 4.511779  | -1.994552 |
| 60 | 1 | 0 | -6.309619 | 3.219701  | -3.187645 |
| 61 | 6 | 0 | -3.640347 | 1.933403  | 2.619557  |
| 62 | 1 | 0 | -2.879498 | 2.738333  | 2.546036  |
| 63 | 6 | 0 | -4.656053 | 2.401724  | 3.668954  |
| 64 | 1 | 0 | -5.192033 | 3.304908  | 3.305981  |
| 65 | 1 | 0 | -4.134097 | 2.668770  | 4.612910  |
| 66 | 1 | 0 | -5.401241 | 1.610206  | 3.895787  |
| 67 | 6 | 0 | -2.900823 | 0.680027  | 3.095785  |
| 68 | 1 | 0 | -3.606567 | -0.151479 | 3.300747  |
| 69 | 1 | 0 | -2.347367 | 0.902676  | 4.032047  |
| 70 | 1 | 0 | -2.169240 | 0.354085  | 2.326926  |
| 71 | 6 | 0 | -1.592180 | 2.954656  | -0.030933 |
| 72 | 6 | 0 | -0.594827 | 4.111923  | -0.050008 |
| 73 | 1 | 0 | -0.955965 | 4.888641  | 0.631253  |
| 74 | 6 | 0 | -0.326251 | 4.736724  | -1.416868 |
| 75 | 1 | 0 | -1.212741 | 5.243927  | -1.804943 |
| 76 | 1 | 0 | -0.024286 | 3.960701  | -2.125365 |
| 77 | 6 | 0 | 0.826399  | 5.713998  | -1.100935 |
| 78 | 1 | 0 | 0.393635  | 6.676422  | -0.812849 |
| 79 | 6 | 0 | 1.885677  | 5.884539  | -2.212351 |
| 80 | 1 | 0 | 1.459950  | 5.742173  | -3.211816 |
| 81 | 1 | 0 | 2.294532  | 6.901458  | -2.174978 |
| 82 | 6 | 0 | 2.986126  | 4.864596  | -1.871881 |

|     |   |   |           |           |           |
|-----|---|---|-----------|-----------|-----------|
| 83  | 1 | 0 | 3.950852  | 5.119007  | -2.323668 |
| 84  | 1 | 0 | 2.700728  | 3.866351  | -2.217831 |
| 85  | 6 | 0 | 3.031879  | 4.878617  | -0.333538 |
| 86  | 1 | 0 | 3.485649  | 3.984159  | 0.094134  |
| 87  | 1 | 0 | 3.605274  | 5.747329  | 0.014359  |
| 88  | 6 | 0 | 1.579355  | 5.089519  | 0.116718  |
| 89  | 1 | 0 | 1.495654  | 5.695824  | 1.019726  |
| 90  | 6 | 0 | 0.767008  | 3.439660  | 1.920771  |
| 91  | 1 | 0 | 0.279239  | 4.291730  | 2.402512  |
| 92  | 1 | 0 | 0.129377  | 2.561183  | 2.005743  |
| 93  | 6 | 0 | 2.107482  | 3.188724  | 2.613565  |
| 94  | 1 | 0 | 1.887210  | 3.163002  | 3.686953  |
| 95  | 1 | 0 | 2.762396  | 4.056767  | 2.476072  |
| 96  | 6 | 0 | 2.950570  | 1.972338  | 2.227061  |
| 97  | 1 | 0 | 3.110841  | 1.953867  | 1.151185  |
| 98  | 1 | 0 | 3.916556  | 2.042031  | 2.735545  |
| 99  | 6 | 0 | 2.197343  | 0.380019  | 4.110396  |
| 100 | 1 | 0 | 2.927114  | 1.033892  | 4.590096  |
| 101 | 6 | 0 | 0.764210  | 0.613054  | 4.607091  |
| 102 | 1 | 0 | 0.221444  | 1.350075  | 4.014567  |
| 103 | 1 | 0 | 0.838489  | 0.993530  | 5.633870  |
| 104 | 6 | 0 | 0.100238  | -0.775834 | 4.609001  |
| 105 | 1 | 0 | -0.256458 | -1.008430 | 3.601654  |
| 106 | 1 | 0 | -0.751768 | -0.833124 | 5.295038  |
| 107 | 6 | 0 | 1.242632  | -1.726813 | 5.006501  |
| 108 | 1 | 0 | 1.066231  | -2.763932 | 4.700288  |
| 109 | 1 | 0 | 1.367775  | -1.726145 | 6.096029  |
| 110 | 6 | 0 | 2.505767  | -1.133431 | 4.344032  |
| 111 | 1 | 0 | 3.379282  | -1.235451 | 4.994320  |
| 112 | 6 | 0 | 2.866481  | -1.698802 | 2.953850  |
| 113 | 1 | 0 | 1.984631  | -2.060770 | 2.419179  |
| 114 | 1 | 0 | 3.604276  | -2.502861 | 3.006057  |
| 115 | 6 | 0 | 3.427950  | -0.464963 | 2.250251  |
| 116 | 1 | 0 | 4.340334  | -0.151014 | 2.767423  |
| 117 | 6 | 0 | 3.756433  | -0.618562 | 0.766288  |
| 118 | 6 | 0 | 5.450873  | -1.432440 | -0.746146 |
| 119 | 6 | 0 | 6.039041  | -0.402829 | -1.527304 |
| 120 | 6 | 0 | 6.468134  | -0.700879 | -2.833428 |
| 121 | 1 | 0 | 6.910251  | 0.063747  | -3.458362 |
| 122 | 6 | 0 | 6.336246  | -1.985528 | -3.351072 |
| 123 | 1 | 0 | 6.671942  | -2.197795 | -4.358109 |
| 124 | 6 | 0 | 5.774338  | -2.998701 | -2.580899 |
| 125 | 1 | 0 | 5.684017  | -3.985937 | -3.014714 |
| 126 | 6 | 0 | 5.326810  | -2.745011 | -1.271556 |

|     |    |   |          |           |           |
|-----|----|---|----------|-----------|-----------|
| 127 | 6  | 0 | 4.694808 | -3.872846 | -0.461822 |
| 128 | 1  | 0 | 4.408606 | -3.518279 | 0.550008  |
| 129 | 6  | 0 | 5.681055 | -5.027303 | -0.249852 |
| 130 | 1  | 0 | 5.237522 | -5.788759 | 0.427077  |
| 131 | 1  | 0 | 6.613708 | -4.650087 | 0.221942  |
| 132 | 1  | 0 | 5.939627 | -5.523480 | -1.209150 |
| 133 | 6  | 0 | 3.405336 | -4.365662 | -1.126579 |
| 134 | 1  | 0 | 2.713921 | -3.511099 | -1.278182 |
| 135 | 1  | 0 | 2.900572 | -5.112876 | -0.477760 |
| 136 | 1  | 0 | 3.609609 | -4.838600 | -2.110276 |
| 137 | 6  | 0 | 6.215579 | 1.011658  | -0.981953 |
| 138 | 1  | 0 | 5.868279 | 1.073452  | 0.070355  |
| 139 | 6  | 0 | 7.693038 | 1.421821  | -0.964536 |
| 140 | 1  | 0 | 8.289551 | 0.676326  | -0.396240 |
| 141 | 1  | 0 | 7.809242 | 2.406988  | -0.463955 |
| 142 | 1  | 0 | 8.105598 | 1.503503  | -1.992175 |
| 143 | 6  | 0 | 5.375994 | 2.017654  | -1.777563 |
| 144 | 1  | 0 | 5.715293 | 2.084579  | -2.832779 |
| 145 | 1  | 0 | 5.459133 | 3.026070  | -1.319973 |
| 146 | 1  | 0 | 4.306901 | 1.716762  | -1.764928 |
| 147 | 8  | 0 | 2.995621 | -0.301332 | -0.160340 |
| 148 | 20 | 0 | 0.723818 | 0.472085  | -0.370507 |

-----

**L3a-Ca(II)-TS1-re**

Zero-point correction= 1.26050 a.u.

Thermal correction to Gibbs Free Energy= 1.15561 a.u.

Sum of electronic and zero-point Energies= -6232.79729 a.u.

Sum of electronic and thermal Free Energies= -6232.90219 a.u.

The number of imaginary frequencies 1

Standard orientation

-----

| Center<br>Number | Atomic<br>Number | Atomic<br>Type | Coordinates (Angstroms) |           |           |
|------------------|------------------|----------------|-------------------------|-----------|-----------|
|                  |                  |                | X                       | Y         | Z         |
| 1                | 6                | 0              | -0.586749               | -3.513763 | -1.376662 |
| 2                | 6                | 0              | -0.898144               | -4.348852 | -0.275268 |
| 3                | 8                | 0              | -1.816840               | -5.254788 | -0.484423 |
| 4                | 6                | 0              | -2.295321               | -6.136414 | 0.565409  |
| 5                | 6                | 0              | -0.275508               | -4.081049 | 1.041875  |
| 6                | 1                | 0              | 0.427045                | -3.122906 | -1.363280 |
| 7                | 1                | 0              | -0.911616               | -3.890354 | -2.344343 |
| 8                | 1                | 0              | -2.937994               | -6.851106 | 0.052937  |
| 9                | 1                | 0              | -2.874314               | -5.558955 | 1.288152  |

-----

|    |    |   |           |           |           |
|----|----|---|-----------|-----------|-----------|
| 10 | 1  | 0 | -1.460192 | -6.652356 | 1.042707  |
| 11 | 1  | 0 | 0.804475  | -4.259527 | 0.977881  |
| 12 | 1  | 0 | -0.688259 | -4.655332 | 1.869923  |
| 13 | 1  | 0 | -0.407945 | -2.996857 | 1.213931  |
| 14 | 6  | 0 | -1.008658 | -1.251785 | -2.418795 |
| 15 | 6  | 0 | -1.476885 | -1.863825 | -1.073840 |
| 16 | 6  | 0 | -2.925046 | -2.174334 | -1.359989 |
| 17 | 6  | 0 | -3.152255 | -1.950051 | -2.731661 |
| 18 | 7  | 0 | -1.982092 | -1.433513 | -3.343326 |
| 19 | 8  | 0 | -1.041703 | -1.303912 | -0.000960 |
| 20 | 8  | 0 | 0.071204  | -0.664038 | -2.562551 |
| 21 | 6  | 0 | -1.878237 | -1.052111 | -4.745158 |
| 22 | 6  | 0 | -3.984223 | -2.587042 | -0.572298 |
| 23 | 6  | 0 | -4.386756 | -2.166637 | -3.325729 |
| 24 | 1  | 0 | -1.930416 | -1.940438 | -5.382524 |
| 25 | 1  | 0 | -0.917860 | -0.556141 | -4.889544 |
| 26 | 1  | 0 | -2.685892 | -0.367593 | -5.018226 |
| 27 | 6  | 0 | -5.431886 | -2.605488 | -2.500157 |
| 28 | 6  | 0 | -5.247685 | -2.808694 | -1.132496 |
| 29 | 1  | 0 | -4.549929 | -1.989665 | -4.383196 |
| 30 | 1  | 0 | -6.413265 | -2.778168 | -2.931395 |
| 31 | 1  | 0 | -6.074815 | -3.125973 | -0.507203 |
| 32 | 35 | 0 | -3.745350 | -2.825912 | 1.311260  |
| 33 | 8  | 0 | 1.248829  | 2.716463  | -0.300531 |
| 34 | 8  | 0 | -1.386492 | 1.749362  | -0.449677 |
| 35 | 8  | 0 | 1.152571  | 0.418201  | 1.978070  |
| 36 | 7  | 0 | -2.954575 | 3.233519  | 0.256412  |
| 37 | 1  | 0 | -3.161989 | 4.162870  | 0.602608  |
| 38 | 7  | 0 | 0.692487  | 3.763641  | 0.385155  |
| 39 | 7  | 0 | 4.940134  | -1.030517 | 0.553469  |
| 40 | 1  | 0 | 5.555259  | -1.229253 | 1.334292  |
| 41 | 7  | 0 | 2.347176  | 0.702242  | 2.588484  |
| 42 | 6  | 0 | -3.998086 | 2.278931  | 0.254931  |
| 43 | 6  | 0 | -4.343956 | 1.608129  | 1.456360  |
| 44 | 6  | 0 | -5.353470 | 0.629066  | 1.422526  |
| 45 | 1  | 0 | -5.636954 | 0.095511  | 2.320048  |
| 46 | 6  | 0 | -6.006400 | 0.319569  | 0.233741  |
| 47 | 1  | 0 | -6.777461 | -0.439970 | 0.224811  |
| 48 | 6  | 0 | -5.674794 | 0.983049  | -0.942981 |
| 49 | 1  | 0 | -6.201356 | 0.717778  | -1.850154 |
| 50 | 6  | 0 | -4.682217 | 1.979802  | -0.952132 |
| 51 | 6  | 0 | -4.367022 | 2.716581  | -2.250128 |
| 52 | 1  | 0 | -3.611894 | 3.511102  | -2.076902 |
| 53 | 6  | 0 | -3.768088 | 1.763506  | -3.288256 |

|    |   |   |           |           |           |
|----|---|---|-----------|-----------|-----------|
| 54 | 1 | 0 | -2.855084 | 1.283629  | -2.876991 |
| 55 | 1 | 0 | -3.476153 | 2.325631  | -4.200976 |
| 56 | 1 | 0 | -4.494588 | 0.975469  | -3.578154 |
| 57 | 6 | 0 | -5.607614 | 3.426639  | -2.805798 |
| 58 | 1 | 0 | -5.329232 | 4.050555  | -3.682056 |
| 59 | 1 | 0 | -6.042717 | 4.096455  | -2.033454 |
| 60 | 1 | 0 | -6.382972 | 2.700841  | -3.129814 |
| 61 | 6 | 0 | -3.642751 | 1.920541  | 2.774553  |
| 62 | 1 | 0 | -2.885673 | 2.720663  | 2.637444  |
| 63 | 6 | 0 | -4.636040 | 2.443392  | 3.819442  |
| 64 | 1 | 0 | -5.187721 | 3.320171  | 3.417535  |
| 65 | 1 | 0 | -4.093077 | 2.768654  | 4.732790  |
| 66 | 1 | 0 | -5.369161 | 1.661776  | 4.110850  |
| 67 | 6 | 0 | -2.885928 | 0.697362  | 3.302366  |
| 68 | 1 | 0 | -3.578627 | -0.133111 | 3.552590  |
| 69 | 1 | 0 | -2.325829 | 0.969119  | 4.221573  |
| 70 | 1 | 0 | -2.158452 | 0.342300  | 2.542326  |
| 71 | 6 | 0 | -1.696089 | 2.896310  | -0.099300 |
| 72 | 6 | 0 | -0.729553 | 4.077776  | -0.111241 |
| 73 | 1 | 0 | -1.105413 | 4.857199  | 0.558076  |
| 74 | 6 | 0 | -0.469204 | 4.682931  | -1.486613 |
| 75 | 1 | 0 | -1.366493 | 5.159086  | -1.889707 |
| 76 | 1 | 0 | -0.144654 | 3.898931  | -2.176263 |
| 77 | 6 | 0 | 0.657432  | 5.692842  | -1.186030 |
| 78 | 1 | 0 | 0.201441  | 6.646449  | -0.904259 |
| 79 | 6 | 0 | 1.705019  | 5.877473  | -2.305246 |
| 80 | 1 | 0 | 1.273714  | 5.728346  | -3.301339 |
| 81 | 1 | 0 | 2.101508  | 6.899550  | -2.271419 |
| 82 | 6 | 0 | 2.819082  | 4.871451  | -1.969990 |
| 83 | 1 | 0 | 3.776019  | 5.130868  | -2.435231 |
| 84 | 1 | 0 | 2.538577  | 3.867808  | -2.304504 |
| 85 | 6 | 0 | 2.882050  | 4.898910  | -0.432477 |
| 86 | 1 | 0 | 3.350397  | 4.012719  | -0.003632 |
| 87 | 1 | 0 | 3.449370  | 5.777047  | -0.098585 |
| 88 | 6 | 0 | 1.431955  | 5.096401  | 0.031558  |
| 89 | 1 | 0 | 1.351396  | 5.716276  | 0.925676  |
| 90 | 6 | 0 | 0.651893  | 3.481424  | 1.876787  |
| 91 | 1 | 0 | 0.152538  | 4.337523  | 2.339633  |
| 92 | 1 | 0 | 0.029079  | 2.595076  | 1.992037  |
| 93 | 6 | 0 | 2.003693  | 3.274213  | 2.563198  |
| 94 | 1 | 0 | 1.794962  | 3.266380  | 3.639169  |
| 95 | 1 | 0 | 2.635287  | 4.155235  | 2.400743  |
| 96 | 6 | 0 | 2.873437  | 2.071090  | 2.191861  |
| 97 | 1 | 0 | 3.011746  | 2.028757  | 1.113524  |

|     |   |   |           |           |           |
|-----|---|---|-----------|-----------|-----------|
| 98  | 1 | 0 | 3.846541  | 2.180727  | 2.679729  |
| 99  | 6 | 0 | 2.213363  | 0.516585  | 4.135088  |
| 100 | 1 | 0 | 2.938163  | 1.204009  | 4.573424  |
| 101 | 6 | 0 | 0.788110  | 0.727345  | 4.663113  |
| 102 | 1 | 0 | 0.210782  | 1.426443  | 4.057220  |
| 103 | 1 | 0 | 0.876827  | 1.146768  | 5.673255  |
| 104 | 6 | 0 | 0.164537  | -0.678577 | 4.730551  |
| 105 | 1 | 0 | -0.212974 | -0.954029 | 3.741708  |
| 106 | 1 | 0 | -0.666128 | -0.736806 | 5.442063  |
| 107 | 6 | 0 | 1.344409  | -1.583602 | 5.125501  |
| 108 | 1 | 0 | 1.188148  | -2.635886 | 4.862428  |
| 109 | 1 | 0 | 1.502156  | -1.539980 | 6.209949  |
| 110 | 6 | 0 | 2.568994  | -0.980001 | 4.403326  |
| 111 | 1 | 0 | 3.466346  | -1.040470 | 5.025851  |
| 112 | 6 | 0 | 2.896708  | -1.578245 | 3.019118  |
| 113 | 1 | 0 | 2.006871  | -1.976009 | 2.524476  |
| 114 | 1 | 0 | 3.655368  | -2.362884 | 3.070189  |
| 115 | 6 | 0 | 3.404673  | -0.354111 | 2.259536  |
| 116 | 1 | 0 | 4.323794  | -0.003206 | 2.738276  |
| 117 | 6 | 0 | 3.695308  | -0.557189 | 0.771180  |
| 118 | 6 | 0 | 5.389925  | -1.371843 | -0.742308 |
| 119 | 6 | 0 | 5.923544  | -0.368081 | -1.592171 |
| 120 | 6 | 0 | 6.341212  | -0.724945 | -2.887214 |
| 121 | 1 | 0 | 6.740158  | 0.018789  | -3.564221 |
| 122 | 6 | 0 | 6.257706  | -2.043091 | -3.324724 |
| 123 | 1 | 0 | 6.587873  | -2.301324 | -4.322819 |
| 124 | 6 | 0 | 5.755763  | -3.031692 | -2.484195 |
| 125 | 1 | 0 | 5.709813  | -4.047848 | -2.853337 |
| 126 | 6 | 0 | 5.315002  | -2.717907 | -1.185644 |
| 127 | 6 | 0 | 4.764684  | -3.823689 | -0.290082 |
| 128 | 1 | 0 | 4.441938  | -3.413021 | 0.688946  |
| 129 | 6 | 0 | 5.840587  | -4.871770 | 0.014610  |
| 130 | 1 | 0 | 5.451146  | -5.619315 | 0.738764  |
| 131 | 1 | 0 | 6.730261  | -4.384208 | 0.467936  |
| 132 | 1 | 0 | 6.156251  | -5.408621 | -0.904926 |
| 133 | 6 | 0 | 3.524253  | -4.475492 | -0.911364 |
| 134 | 1 | 0 | 2.766386  | -3.699852 | -1.146611 |
| 135 | 1 | 0 | 3.072460  | -5.196103 | -0.196441 |
| 136 | 1 | 0 | 3.776103  | -5.022796 | -1.843995 |
| 137 | 6 | 0 | 6.057460  | 1.080260  | -1.130063 |
| 138 | 1 | 0 | 5.731224  | 1.188277  | -0.074532 |
| 139 | 6 | 0 | 7.517978  | 1.546508  | -1.171184 |
| 140 | 1 | 0 | 8.156134  | 0.857906  | -0.576894 |
| 141 | 1 | 0 | 7.606405  | 2.562009  | -0.729058 |

|     |    |   |          |           |           |
|-----|----|---|----------|-----------|-----------|
| 142 | 1  | 0 | 7.904199 | 1.586196  | -2.211412 |
| 143 | 6  | 0 | 5.162244 | 2.007234  | -1.958796 |
| 144 | 1  | 0 | 5.466240 | 2.017462  | -3.026776 |
| 145 | 1  | 0 | 5.228018 | 3.044544  | -1.568206 |
| 146 | 1  | 0 | 4.104517 | 1.675443  | -1.890548 |
| 147 | 8  | 0 | 2.892450 | -0.334566 | -0.148016 |
| 148 | 20 | 0 | 0.619530 | 0.432851  | -0.305658 |

-----

**L3a-Ca(II)-IM2-re**

Zero-point correction= 1.26152 a.u.

Thermal correction to Gibbs Free Energy= 1.15541 a.u.

Sum of electronic and zero-point Energies= -6232.79668 a.u.

Sum of electronic and thermal Free Energies= -6232.90278 a.u.

The number of imaginary frequencies        0

Standard orientation

-----

| Center<br>Number | Atomic<br>Number | Atomic<br>Type | Coordinates (Angstroms) |           |           |
|------------------|------------------|----------------|-------------------------|-----------|-----------|
|                  |                  |                | X                       | Y         | Z         |
| 1                | 6                | 0              | -0.484296               | -3.402440 | -1.337789 |
| 2                | 6                | 0              | -0.691218               | -4.265219 | -0.200918 |
| 3                | 8                | 0              | -1.472552               | -5.281064 | -0.394408 |
| 4                | 6                | 0              | -1.819708               | -6.209691 | 0.673542  |
| 5                | 6                | 0              | -0.106992               | -3.886641 | 1.096885  |
| 6                | 1                | 0              | 0.538042                | -3.024117 | -1.365949 |
| 7                | 1                | 0              | -0.774129               | -3.869966 | -2.278553 |
| 8                | 1                | 0              | -2.341178               | -7.022914 | 0.171432  |
| 9                | 1                | 0              | -2.485026               | -5.706568 | 1.376809  |
| 10               | 1                | 0              | -0.915056               | -6.574339 | 1.161963  |
| 11               | 1                | 0              | 0.986976                | -3.935738 | 1.031780  |
| 12               | 1                | 0              | -0.451777               | -4.468084 | 1.950424  |
| 13               | 1                | 0              | -0.358633               | -2.810435 | 1.201905  |
| 14               | 6                | 0              | -0.943637               | -1.233021 | -2.453456 |
| 15               | 6                | 0              | -1.373175               | -1.930659 | -1.127538 |
| 16               | 6                | 0              | -2.831195               | -2.253323 | -1.438150 |
| 17               | 6                | 0              | -3.065427               | -1.979725 | -2.798540 |
| 18               | 7                | 0              | -1.909749               | -1.406434 | -3.386338 |
| 19               | 8                | 0              | -1.018426               | -1.286590 | -0.040638 |
| 20               | 8                | 0              | 0.112180                | -0.599225 | -2.576437 |
| 21               | 6                | 0              | -1.827919               | -0.940225 | -4.763640 |
| 22               | 6                | 0              | -3.884376               | -2.720422 | -0.675294 |
| 23               | 6                | 0              | -4.292873               | -2.201159 | -3.406653 |
| 24               | 1                | 0              | -1.835011               | -1.791716 | -5.451420 |

|    |    |   |           |           |           |
|----|----|---|-----------|-----------|-----------|
| 25 | 1  | 0 | -0.895017 | -0.387230 | -4.878400 |
| 26 | 1  | 0 | -2.671136 | -0.284805 | -4.997914 |
| 27 | 6  | 0 | -5.330330 | -2.695950 | -2.603988 |
| 28 | 6  | 0 | -5.142842 | -2.948411 | -1.245464 |
| 29 | 1  | 0 | -4.455458 | -1.986843 | -4.457495 |
| 30 | 1  | 0 | -6.306627 | -2.873871 | -3.044730 |
| 31 | 1  | 0 | -5.962233 | -3.308802 | -0.633603 |
| 32 | 35 | 0 | -3.652154 | -3.031651 | 1.201146  |
| 33 | 8  | 0 | 1.155373  | 2.781602  | -0.268601 |
| 34 | 8  | 0 | -1.447902 | 1.763782  | -0.466165 |
| 35 | 8  | 0 | 1.151907  | 0.449013  | 1.995623  |
| 36 | 7  | 0 | -3.047653 | 3.159348  | 0.341510  |
| 37 | 1  | 0 | -3.276565 | 4.061357  | 0.742343  |
| 38 | 7  | 0 | 0.578978  | 3.806140  | 0.434246  |
| 39 | 7  | 0 | 4.952014  | -0.892591 | 0.502707  |
| 40 | 1  | 0 | 5.580359  | -1.096194 | 1.271931  |
| 41 | 7  | 0 | 2.346686  | 0.766012  | 2.590186  |
| 42 | 6  | 0 | -4.052745 | 2.164030  | 0.326997  |
| 43 | 6  | 0 | -4.355713 | 1.447919  | 1.513904  |
| 44 | 6  | 0 | -5.319539 | 0.424397  | 1.464010  |
| 45 | 1  | 0 | -5.569746 | -0.143709 | 2.350118  |
| 46 | 6  | 0 | -5.968217 | 0.113899  | 0.273187  |
| 47 | 1  | 0 | -6.702656 | -0.680879 | 0.251393  |
| 48 | 6  | 0 | -5.679897 | 0.821799  | -0.888846 |
| 49 | 1  | 0 | -6.203022 | 0.555439  | -1.797656 |
| 50 | 6  | 0 | -4.735375 | 1.864149  | -0.881138 |
| 51 | 6  | 0 | -4.471448 | 2.649780  | -2.161675 |
| 52 | 1  | 0 | -3.750654 | 3.472727  | -1.975508 |
| 53 | 6  | 0 | -3.845498 | 1.754142  | -3.234716 |
| 54 | 1  | 0 | -2.910419 | 1.297605  | -2.847247 |
| 55 | 1  | 0 | -3.585248 | 2.356172  | -4.131449 |
| 56 | 1  | 0 | -4.543021 | 0.947195  | -3.543157 |
| 57 | 6  | 0 | -5.750667 | 3.318300  | -2.680230 |
| 58 | 1  | 0 | -5.513689 | 3.978941  | -3.541610 |
| 59 | 1  | 0 | -6.204282 | 3.945211  | -1.882860 |
| 60 | 1  | 0 | -6.497300 | 2.567433  | -3.014616 |
| 61 | 6  | 0 | -3.656233 | 1.758436  | 2.833521  |
| 62 | 1  | 0 | -2.934015 | 2.592059  | 2.709749  |
| 63 | 6  | 0 | -4.661627 | 2.215059  | 3.897809  |
| 64 | 1  | 0 | -5.250995 | 3.078644  | 3.521646  |
| 65 | 1  | 0 | -4.125284 | 2.539277  | 4.815398  |
| 66 | 1  | 0 | -5.360677 | 1.397656  | 4.174222  |
| 67 | 6  | 0 | -2.845119 | 0.555910  | 3.327318  |
| 68 | 1  | 0 | -3.500518 | -0.308271 | 3.563555  |



|     |   |   |           |           |           |
|-----|---|---|-----------|-----------|-----------|
| 69  | 1 | 0 | -2.289601 | 0.830127  | 4.248458  |
| 70  | 1 | 0 | -2.110066 | 0.248159  | 2.553937  |
| 71  | 6 | 0 | -1.786324 | 2.881935  | -0.056431 |
| 72  | 6 | 0 | -0.856726 | 4.091817  | -0.044913 |
| 73  | 1 | 0 | -1.248638 | 4.845566  | 0.643982  |
| 74  | 6 | 0 | -0.624395 | 4.730033  | -1.409910 |
| 75  | 1 | 0 | -1.537466 | 5.189147  | -1.796905 |
| 76  | 1 | 0 | -0.285279 | 3.967296  | -2.116335 |
| 77  | 6 | 0 | 0.477662  | 5.763483  | -1.100908 |
| 78  | 1 | 0 | -0.000005 | 6.698572  | -0.793936 |
| 79  | 6 | 0 | 1.506025  | 5.998247  | -2.228335 |
| 80  | 1 | 0 | 1.065482  | 5.861824  | -3.222258 |
| 81  | 1 | 0 | 1.879311  | 7.028325  | -2.175751 |
| 82  | 6 | 0 | 2.647019  | 5.011310  | -1.929665 |
| 83  | 1 | 0 | 3.591173  | 5.303020  | -2.401736 |
| 84  | 1 | 0 | 2.385277  | 4.008537  | -2.282486 |
| 85  | 6 | 0 | 2.730383  | 5.007054  | -0.392992 |
| 86  | 1 | 0 | 3.223414  | 4.121857  | 0.009275  |
| 87  | 1 | 0 | 3.282994  | 5.889951  | -0.047487 |
| 88  | 6 | 0 | 1.282454  | 5.162424  | 0.094313  |
| 89  | 1 | 0 | 1.200833  | 5.764153  | 1.000557  |
| 90  | 6 | 0 | 0.561143  | 3.502434  | 1.921639  |
| 91  | 1 | 0 | 0.042506  | 4.336764  | 2.402550  |
| 92  | 1 | 0 | -0.034908 | 2.596806  | 2.030163  |
| 93  | 6 | 0 | 1.927249  | 3.325485  | 2.588183  |
| 94  | 1 | 0 | 1.734312  | 3.300423  | 3.666828  |
| 95  | 1 | 0 | 2.530970  | 4.226017  | 2.426960  |
| 96  | 6 | 0 | 2.824838  | 2.151259  | 2.190690  |
| 97  | 1 | 0 | 2.941205  | 2.119007  | 1.109437  |
| 98  | 1 | 0 | 3.804689  | 2.286806  | 2.657889  |
| 99  | 6 | 0 | 2.242682  | 0.575265  | 4.139115  |
| 100 | 1 | 0 | 2.949966  | 1.287347  | 4.566241  |
| 101 | 6 | 0 | 0.819127  | 0.736709  | 4.688611  |
| 102 | 1 | 0 | 0.207948  | 1.410865  | 4.087767  |
| 103 | 1 | 0 | 0.907372  | 1.164446  | 5.695223  |
| 104 | 6 | 0 | 0.248292  | -0.690559 | 4.771725  |
| 105 | 1 | 0 | -0.134978 | -0.983458 | 3.789938  |
| 106 | 1 | 0 | -0.568413 | -0.776039 | 5.496582  |
| 107 | 6 | 0 | 1.466393  | -1.550530 | 5.150129  |
| 108 | 1 | 0 | 1.343306  | -2.609520 | 4.896349  |
| 109 | 1 | 0 | 1.642015  | -1.494206 | 6.231200  |
| 110 | 6 | 0 | 2.654562  | -0.907347 | 4.402423  |
| 111 | 1 | 0 | 3.566253  | -0.936107 | 5.006148  |
| 112 | 6 | 0 | 2.974436  | -1.496493 | 3.012881  |

|     |    |   |          |           |           |
|-----|----|---|----------|-----------|-----------|
| 113 | 1  | 0 | 2.088149 | -1.921152 | 2.534227  |
| 114 | 1  | 0 | 3.756992 | -2.258031 | 3.052065  |
| 115 | 6  | 0 | 3.431526 | -0.257849 | 2.243772  |
| 116 | 1  | 0 | 4.348234 | 0.121095  | 2.705731  |
| 117 | 6  | 0 | 3.698157 | -0.455874 | 0.751269  |
| 118 | 6  | 0 | 5.355190 | -1.275316 | -0.797738 |
| 119 | 6  | 0 | 5.783260 | -0.288853 | -1.724792 |
| 120 | 6  | 0 | 6.143336 | -0.687533 | -3.024817 |
| 121 | 1  | 0 | 6.464570 | 0.041076  | -3.757356 |
| 122 | 6  | 0 | 6.102936 | -2.027614 | -3.396135 |
| 123 | 1  | 0 | 6.387873 | -2.317306 | -4.399523 |
| 124 | 6  | 0 | 5.702861 | -2.997537 | -2.482631 |
| 125 | 1  | 0 | 5.685341 | -4.031070 | -2.802453 |
| 126 | 6  | 0 | 5.321452 | -2.643309 | -1.175746 |
| 127 | 6  | 0 | 4.870249 | -3.729627 | -0.204304 |
| 128 | 1  | 0 | 4.589384 | -3.289322 | 0.773970  |
| 129 | 6  | 0 | 6.002888 | -4.722761 | 0.078898  |
| 130 | 1  | 0 | 5.687306 | -5.448660 | 0.858821  |
| 131 | 1  | 0 | 6.898284 | -4.183187 | 0.455166  |
| 132 | 1  | 0 | 6.283614 | -5.290345 | -0.833492 |
| 133 | 6  | 0 | 3.622037 | -4.453681 | -0.722049 |
| 134 | 1  | 0 | 2.821707 | -3.718211 | -0.944334 |
| 135 | 1  | 0 | 3.241535 | -5.157251 | 0.049094  |
| 136 | 1  | 0 | 3.840424 | -5.032067 | -1.644509 |
| 137 | 6  | 0 | 5.877040 | 1.184141  | -1.336891 |
| 138 | 1  | 0 | 5.604935 | 1.328193  | -0.270694 |
| 139 | 6  | 0 | 7.311553 | 1.707381  | -1.481571 |
| 140 | 1  | 0 | 8.011456 | 1.071498  | -0.898083 |
| 141 | 1  | 0 | 7.380843 | 2.743683  | -1.086506 |
| 142 | 1  | 0 | 7.636739 | 1.718614  | -2.543311 |
| 143 | 6  | 0 | 4.898587 | 2.034232  | -2.154361 |
| 144 | 1  | 0 | 5.143338 | 2.006588  | -3.237067 |
| 145 | 1  | 0 | 4.942451 | 3.090247  | -1.814637 |
| 146 | 1  | 0 | 3.860403 | 1.665423  | -2.012730 |
| 147 | 8  | 0 | 2.869493 | -0.257880 | -0.149321 |
| 148 | 20 | 0 | 0.580733 | 0.479353  | -0.290387 |

---

**L3a-Ca(II)-TS2-re**

Zero-point correction= 1.25802 a.u.

Thermal correction to Gibbs Free Energy= 1.15590 a.u.

Sum of electronic and zero-point Energies= -6232.79671 a.u.

Sum of electronic and thermal Free Energies= -6232.89883 a.u.

The number of imaginary frequencies 1

## Standard orientation

| Center<br>Number | Atomic<br>Number | Atomic<br>Type | Coordinates (Angstroms) |           |           |
|------------------|------------------|----------------|-------------------------|-----------|-----------|
|                  |                  |                | X                       | Y         | Z         |
| 1                | 6                | 0              | -0.799178               | -3.490653 | -1.502607 |
| 2                | 6                | 0              | -0.849300               | -4.235253 | -0.234926 |
| 3                | 8                | 0              | -1.770646               | -5.165427 | -0.174000 |
| 4                | 6                | 0              | -1.962536               | -5.926935 | 1.043369  |
| 5                | 6                | 0              | -0.120332               | -3.695652 | 0.846286  |
| 6                | 1                | 0              | 0.238104                | -3.287969 | -1.775963 |
| 7                | 1                | 0              | -1.311991               | -4.004644 | -2.315250 |
| 8                | 1                | 0              | -2.648963               | -6.727538 | 0.770313  |
| 9                | 1                | 0              | -2.411706               | -5.291022 | 1.807760  |
| 10               | 1                | 0              | -1.009923               | -6.337541 | 1.385240  |
| 11               | 1                | 0              | 0.904208                | -3.410843 | 0.603410  |
| 12               | 1                | 0              | -0.232923               | -4.132325 | 1.835278  |
| 13               | 1                | 0              | -0.634526               | -2.507440 | 0.671199  |
| 14               | 6                | 0              | -1.004931               | -1.238254 | -2.498553 |
| 15               | 6                | 0              | -1.480573               | -2.009619 | -1.245346 |
| 16               | 6                | 0              | -2.976764               | -2.105270 | -1.516192 |
| 17               | 6                | 0              | -3.194007               | -1.742160 | -2.857851 |
| 18               | 7                | 0              | -1.985069               | -1.268769 | -3.430783 |
| 19               | 8                | 0              | -1.039247               | -1.442249 | -0.090337 |
| 20               | 8                | 0              | 0.103815                | -0.693878 | -2.591312 |
| 21               | 6                | 0              | -1.853167               | -0.762910 | -4.790378 |
| 22               | 6                | 0              | -4.069672               | -2.467646 | -0.751172 |
| 23               | 6                | 0              | -4.443695               | -1.794571 | -3.457888 |
| 24               | 1                | 0              | -1.992023               | -1.579227 | -5.506036 |
| 25               | 1                | 0              | -0.851462               | -0.347362 | -4.901983 |
| 26               | 1                | 0              | -2.595167               | 0.015179  | -4.988128 |
| 27               | 6                | 0              | -5.521679               | -2.205522 | -2.662003 |
| 28               | 6                | 0              | -5.349933               | -2.528489 | -1.316768 |
| 29               | 1                | 0              | -4.590844               | -1.512989 | -4.494832 |
| 30               | 1                | 0              | -6.516072               | -2.254897 | -3.095247 |
| 31               | 1                | 0              | -6.199979               | -2.814204 | -0.707339 |
| 32               | 35               | 0              | -3.878214               | -2.830493 | 1.118894  |
| 33               | 8                | 0              | 1.278429                | 2.606212  | -0.220908 |
| 34               | 8                | 0              | -1.384400               | 1.680927  | -0.369442 |
| 35               | 8                | 0              | 1.135913                | 0.240464  | 1.971647  |
| 36               | 7                | 0              | -2.910276               | 3.188811  | 0.386349  |
| 37               | 1                | 0              | -3.096355               | 4.127798  | 0.718029  |
| 38               | 7                | 0              | 0.736782                | 3.640745  | 0.496361  |
| 39               | 7                | 0              | 4.953580                | -1.111592 | 0.534752  |

|    |   |   |           |           |           |
|----|---|---|-----------|-----------|-----------|
| 40 | 1 | 0 | 5.624785  | -1.155964 | 1.292813  |
| 41 | 7 | 0 | 2.325388  | 0.487693  | 2.608910  |
| 42 | 6 | 0 | -3.991944 | 2.279716  | 0.340078  |
| 43 | 6 | 0 | -4.352742 | 1.551196  | 1.502385  |
| 44 | 6 | 0 | -5.410232 | 0.626922  | 1.425022  |
| 45 | 1 | 0 | -5.707817 | 0.052888  | 2.292411  |
| 46 | 6 | 0 | -6.094401 | 0.425502  | 0.230559  |
| 47 | 1 | 0 | -6.903030 | -0.292515 | 0.187590  |
| 48 | 6 | 0 | -5.745185 | 1.143720  | -0.908529 |
| 49 | 1 | 0 | -6.295090 | 0.960766  | -1.822112 |
| 50 | 6 | 0 | -4.707272 | 2.092193  | -0.870883 |
| 51 | 6 | 0 | -4.374970 | 2.896400  | -2.123356 |
| 52 | 1 | 0 | -3.589609 | 3.650441  | -1.908975 |
| 53 | 6 | 0 | -3.818560 | 1.987709  | -3.221941 |
| 54 | 1 | 0 | -2.926038 | 1.445588  | -2.844312 |
| 55 | 1 | 0 | -3.505261 | 2.594468  | -4.098276 |
| 56 | 1 | 0 | -4.578117 | 1.250703  | -3.557517 |
| 57 | 6 | 0 | -5.591445 | 3.685204  | -2.623198 |
| 58 | 1 | 0 | -5.294782 | 4.352676  | -3.460568 |
| 59 | 1 | 0 | -5.996678 | 4.320151  | -1.806355 |
| 60 | 1 | 0 | -6.395080 | 3.010705  | -2.986532 |
| 61 | 6 | 0 | -3.620547 | 1.748374  | 2.825692  |
| 62 | 1 | 0 | -2.827921 | 2.519184  | 2.725851  |
| 63 | 6 | 0 | -4.573465 | 2.250924  | 3.916997  |
| 64 | 1 | 0 | -5.088000 | 3.176038  | 3.579441  |
| 65 | 1 | 0 | -4.002882 | 2.492864  | 4.839424  |
| 66 | 1 | 0 | -5.338894 | 1.487632  | 4.172028  |
| 67 | 6 | 0 | -2.916789 | 0.460277  | 3.264521  |
| 68 | 1 | 0 | -3.644826 | -0.353046 | 3.466245  |
| 69 | 1 | 0 | -2.341310 | 0.645957  | 4.195215  |
| 70 | 1 | 0 | -2.209854 | 0.124531  | 2.476543  |
| 71 | 6 | 0 | -1.666811 | 2.828466  | 0.003140  |
| 72 | 6 | 0 | -0.676696 | 3.990769  | 0.005278  |
| 73 | 1 | 0 | -1.036561 | 4.764941  | 0.688930  |
| 74 | 6 | 0 | -0.403061 | 4.617985  | -1.357586 |
| 75 | 1 | 0 | -1.289729 | 5.121600  | -1.750262 |
| 76 | 1 | 0 | -0.095185 | 3.842247  | -2.063635 |
| 77 | 6 | 0 | 0.745218  | 5.597993  | -1.036174 |
| 78 | 1 | 0 | 0.309889  | 6.559298  | -0.747808 |
| 79 | 6 | 0 | 1.808066  | 5.771582  | -2.144115 |
| 80 | 1 | 0 | 1.385421  | 5.630326  | -3.144964 |
| 81 | 1 | 0 | 2.216456  | 6.788624  | -2.103861 |
| 82 | 6 | 0 | 2.907161  | 4.751301  | -1.801254 |
| 83 | 1 | 0 | 3.873389  | 5.002611  | -2.251715 |

|     |   |   |           |           |           |
|-----|---|---|-----------|-----------|-----------|
| 84  | 1 | 0 | 2.619642  | 3.753183  | -2.145221 |
| 85  | 6 | 0 | 2.949404  | 4.768054  | -0.262999 |
| 86  | 1 | 0 | 3.406490  | 3.877352  | 0.168457  |
| 87  | 1 | 0 | 3.517203  | 5.640310  | 0.084886  |
| 88  | 6 | 0 | 1.495075  | 4.971772  | 0.182479  |
| 89  | 1 | 0 | 1.405284  | 5.574021  | 1.087773  |
| 90  | 6 | 0 | 0.682921  | 3.313926  | 1.978307  |
| 91  | 1 | 0 | 0.192171  | 4.162777  | 2.462626  |
| 92  | 1 | 0 | 0.046751  | 2.433769  | 2.061739  |
| 93  | 6 | 0 | 2.024085  | 3.064154  | 2.669580  |
| 94  | 1 | 0 | 1.804054  | 3.020726  | 3.742451  |
| 95  | 1 | 0 | 2.671690  | 3.939632  | 2.545070  |
| 96  | 6 | 0 | 2.875432  | 1.860291  | 2.263122  |
| 97  | 1 | 0 | 3.019338  | 1.852869  | 1.184446  |
| 98  | 1 | 0 | 3.847641  | 1.935282  | 2.758588  |
| 99  | 6 | 0 | 2.169967  | 0.252685  | 4.147319  |
| 100 | 1 | 0 | 2.893034  | 0.921392  | 4.616214  |
| 101 | 6 | 0 | 0.739566  | 0.454832  | 4.664196  |
| 102 | 1 | 0 | 0.172667  | 1.173464  | 4.071379  |
| 103 | 1 | 0 | 0.817718  | 0.845477  | 5.686722  |
| 104 | 6 | 0 | 0.110322  | -0.950158 | 4.685203  |
| 105 | 1 | 0 | -0.256703 | -1.196890 | 3.684417  |
| 106 | 1 | 0 | -0.728642 | -1.025678 | 5.385218  |
| 107 | 6 | 0 | 1.282099  | -1.870098 | 5.068143  |
| 108 | 1 | 0 | 1.123892  | -2.915064 | 4.778314  |
| 109 | 1 | 0 | 1.430235  | -1.853493 | 6.154688  |
| 110 | 6 | 0 | 2.514873  | -1.253970 | 4.372146  |
| 111 | 1 | 0 | 3.408572  | -1.339764 | 4.996845  |
| 112 | 6 | 0 | 2.845410  | -1.811054 | 2.971654  |
| 113 | 1 | 0 | 1.952558  | -2.175283 | 2.456789  |
| 114 | 1 | 0 | 3.591199  | -2.609099 | 2.999923  |
| 115 | 6 | 0 | 3.379662  | -0.569509 | 2.261818  |
| 116 | 1 | 0 | 4.293220  | -0.243064 | 2.768505  |
| 117 | 6 | 0 | 3.683766  | -0.720414 | 0.771748  |
| 118 | 6 | 0 | 5.434948  | -1.309211 | -0.779841 |
| 119 | 6 | 0 | 6.083365  | -0.246782 | -1.462113 |
| 120 | 6 | 0 | 6.533193  | -0.457477 | -2.778291 |
| 121 | 1 | 0 | 7.025267  | 0.333942  | -3.328061 |
| 122 | 6 | 0 | 6.351575  | -1.686036 | -3.405357 |
| 123 | 1 | 0 | 6.701258  | -1.830161 | -4.419619 |
| 124 | 6 | 0 | 5.720872  | -2.729704 | -2.735607 |
| 125 | 1 | 0 | 5.592117  | -3.671144 | -3.253104 |
| 126 | 6 | 0 | 5.256098  | -2.563994 | -1.418275 |
| 127 | 6 | 0 | 4.559878  | -3.725198 | -0.715362 |

|     |    |   |          |           |           |
|-----|----|---|----------|-----------|-----------|
| 128 | 1  | 0 | 4.274645 | -3.444536 | 0.319796  |
| 129 | 6  | 0 | 5.487816 | -4.939126 | -0.587692 |
| 130 | 1  | 0 | 4.995578 | -5.733815 | 0.013027  |
| 131 | 1  | 0 | 6.426298 | -4.649335 | -0.068441 |
| 132 | 1  | 0 | 5.743997 | -5.362908 | -1.581533 |
| 133 | 6  | 0 | 3.261165 | -4.098267 | -1.437717 |
| 134 | 1  | 0 | 2.624661 | -3.196479 | -1.553077 |
| 135 | 1  | 0 | 2.696943 | -4.852746 | -0.848706 |
| 136 | 1  | 0 | 3.464330 | -4.520178 | -2.444781 |
| 137 | 6  | 0 | 6.287997 | 1.115445  | -0.806087 |
| 138 | 1  | 0 | 5.894041 | 1.115720  | 0.231663  |
| 139 | 6  | 0 | 7.777625 | 1.462549  | -0.698767 |
| 140 | 1  | 0 | 8.320012 | 0.655054  | -0.161885 |
| 141 | 1  | 0 | 7.909316 | 2.404556  | -0.124222 |
| 142 | 1  | 0 | 8.237535 | 1.598541  | -1.700306 |
| 143 | 6  | 0 | 5.521743 | 2.209411  | -1.557843 |
| 144 | 1  | 0 | 5.913714 | 2.346465  | -2.587560 |
| 145 | 1  | 0 | 5.614177 | 3.176188  | -1.018726 |
| 146 | 1  | 0 | 4.444675 | 1.944852  | -1.618131 |
| 147 | 8  | 0 | 2.854271 | -0.552935 | -0.134955 |
| 148 | 20 | 0 | 0.622644 | 0.341898  | -0.323617 |

---

**L3a-Ca(II)-IM3-re**

Zero-point correction= 1.26328 a.u.

Thermal correction to Gibbs Free Energy= 1.16221 a.u.

Sum of electronic and zero-point Energies= -6232.82367 a.u.

Sum of electronic and thermal Free Energies= -6232.924747 a.u.

The number of imaginary frequencies 0

Standard orientation

---

| Center<br>Number | Atomic<br>Number | Atomic<br>Type | Coordinates (Angstroms) |           |           |
|------------------|------------------|----------------|-------------------------|-----------|-----------|
|                  |                  |                | X                       | Y         | Z         |
| 1                | 6                | 0              | -0.587306               | -3.262214 | -1.488408 |
| 2                | 6                | 0              | -0.553387               | -4.243089 | -0.347118 |
| 3                | 8                | 0              | -1.530669               | -5.172415 | -0.467012 |
| 4                | 6                | 0              | -1.621525               | -6.173121 | 0.548487  |
| 5                | 6                | 0              | 0.341685                | -4.150594 | 0.654701  |
| 6                | 1                | 0              | 0.422970                | -2.883272 | -1.662883 |
| 7                | 1                | 0              | -0.926203               | -3.761562 | -2.400337 |
| 8                | 1                | 0              | -2.454030               | -6.816869 | 0.260993  |
| 9                | 1                | 0              | -1.825621               | -5.722559 | 1.525615  |
| 10               | 1                | 0              | -0.697563               | -6.761169 | 0.597784  |

|    |    |   |           |           |           |
|----|----|---|-----------|-----------|-----------|
| 11 | 1  | 0 | 1.117746  | -3.395324 | 0.603656  |
| 12 | 1  | 0 | 0.372369  | -4.839173 | 1.490913  |
| 13 | 1  | 0 | -0.936906 | -2.040552 | 0.649394  |
| 14 | 6  | 0 | -1.201606 | -1.064356 | -2.411213 |
| 15 | 6  | 0 | -1.491163 | -2.005647 | -1.226438 |
| 16 | 6  | 0 | -2.973033 | -2.266843 | -1.413456 |
| 17 | 6  | 0 | -3.314498 | -1.844729 | -2.710743 |
| 18 | 7  | 0 | -2.212936 | -1.171289 | -3.299608 |
| 19 | 8  | 0 | -1.089921 | -1.350482 | -0.029979 |
| 20 | 8  | 0 | -0.179227 | -0.373387 | -2.515834 |
| 21 | 6  | 0 | -2.206266 | -0.598875 | -4.639372 |
| 22 | 6  | 0 | -3.964541 | -2.807369 | -0.614187 |
| 23 | 6  | 0 | -4.581126 | -2.017386 | -3.247259 |
| 24 | 1  | 0 | -2.097831 | -1.394379 | -5.383382 |
| 25 | 1  | 0 | -1.364998 | 0.090591  | -4.715638 |
| 26 | 1  | 0 | -3.138842 | -0.062414 | -4.826152 |
| 27 | 6  | 0 | -5.550245 | -2.605574 | -2.423561 |
| 28 | 6  | 0 | -5.261092 | -2.983228 | -1.112674 |
| 29 | 1  | 0 | -4.823984 | -1.693905 | -4.253335 |
| 30 | 1  | 0 | -6.556422 | -2.750952 | -2.804883 |
| 31 | 1  | 0 | -6.035442 | -3.400153 | -0.478684 |
| 32 | 35 | 0 | -3.611129 | -3.251099 | 1.210826  |
| 33 | 8  | 0 | 1.208638  | 2.796580  | -0.132888 |
| 34 | 8  | 0 | -1.398342 | 1.722446  | -0.100261 |
| 35 | 8  | 0 | 1.169034  | 0.277074  | 1.935093  |
| 36 | 7  | 0 | -3.022579 | 3.206254  | 0.458858  |
| 37 | 1  | 0 | -3.278814 | 4.172236  | 0.628948  |
| 38 | 7  | 0 | 0.638410  | 3.760452  | 0.658230  |
| 39 | 7  | 0 | 4.962289  | -1.027309 | 0.417463  |
| 40 | 1  | 0 | 5.570927  | -1.311803 | 1.176759  |
| 41 | 7  | 0 | 2.356838  | 0.535516  | 2.576760  |
| 42 | 6  | 0 | -4.063649 | 2.259706  | 0.318389  |
| 43 | 6  | 0 | -4.379213 | 1.391825  | 1.395391  |
| 44 | 6  | 0 | -5.365659 | 0.406512  | 1.208778  |
| 45 | 1  | 0 | -5.623691 | -0.276387 | 2.007329  |
| 46 | 6  | 0 | -6.034060 | 0.288963  | -0.005787 |
| 47 | 1  | 0 | -6.790542 | -0.474581 | -0.132475 |
| 48 | 6  | 0 | -5.739155 | 1.152354  | -1.056071 |
| 49 | 1  | 0 | -6.277086 | 1.033611  | -1.987289 |
| 50 | 6  | 0 | -4.762347 | 2.154329  | -0.911836 |
| 51 | 6  | 0 | -4.468599 | 3.093954  | -2.076644 |
| 52 | 1  | 0 | -3.706516 | 3.848055  | -1.791530 |
| 53 | 6  | 0 | -3.890699 | 2.324865  | -3.267317 |
| 54 | 1  | 0 | -2.979187 | 1.774135  | -2.951890 |

|    |   |   |           |           |           |
|----|---|---|-----------|-----------|-----------|
| 55 | 1 | 0 | -3.601989 | 3.029715  | -4.076257 |
| 56 | 1 | 0 | -4.629706 | 1.604022  | -3.675624 |
| 57 | 6 | 0 | -5.718069 | 3.884312  | -2.483634 |
| 58 | 1 | 0 | -5.457841 | 4.638428  | -3.257214 |
| 59 | 1 | 0 | -6.130882 | 4.423673  | -1.604251 |
| 60 | 1 | 0 | -6.504577 | 3.218971  | -2.898194 |
| 61 | 6 | 0 | -3.682066 | 1.514358  | 2.746496  |
| 62 | 1 | 0 | -2.958251 | 2.356097  | 2.740158  |
| 63 | 6 | 0 | -4.686925 | 1.826109  | 3.861955  |
| 64 | 1 | 0 | -5.271695 | 2.735448  | 3.605640  |
| 65 | 1 | 0 | -4.150599 | 2.020537  | 4.815598  |
| 66 | 1 | 0 | -5.389757 | 0.981920  | 4.024488  |
| 67 | 6 | 0 | -2.878015 | 0.251555  | 3.070265  |
| 68 | 1 | 0 | -3.539698 | -0.631929 | 3.187208  |
| 69 | 1 | 0 | -2.320734 | 0.393935  | 4.019437  |
| 70 | 1 | 0 | -2.144062 | 0.049752  | 2.261855  |
| 71 | 6 | 0 | -1.743132 | 2.880248  | 0.178084  |
| 72 | 6 | 0 | -0.796207 | 4.078806  | 0.214110  |
| 73 | 1 | 0 | -1.176387 | 4.796882  | 0.947410  |
| 74 | 6 | 0 | -0.576311 | 4.796157  | -1.115270 |
| 75 | 1 | 0 | -1.489091 | 5.289158  | -1.458416 |
| 76 | 1 | 0 | -0.255139 | 4.078222  | -1.874773 |
| 77 | 6 | 0 | 0.540659  | 5.799609  | -0.756240 |
| 78 | 1 | 0 | 0.073472  | 6.722813  | -0.401157 |
| 79 | 6 | 0 | 1.571753  | 6.084314  | -1.870587 |
| 80 | 1 | 0 | 1.134062  | 5.988388  | -2.870395 |
| 81 | 1 | 0 | 1.939898  | 7.112838  | -1.774051 |
| 82 | 6 | 0 | 2.718357  | 5.091092  | -1.613425 |
| 83 | 1 | 0 | 3.663654  | 5.413178  | -2.063061 |
| 84 | 1 | 0 | 2.466947  | 4.105823  | -2.018064 |
| 85 | 6 | 0 | 2.791960  | 5.009423  | -0.078285 |
| 86 | 1 | 0 | 3.288237  | 4.108089  | 0.282473  |
| 87 | 1 | 0 | 3.337478  | 5.876486  | 0.315456  |
| 88 | 6 | 0 | 1.340670  | 5.132963  | 0.407909  |
| 89 | 1 | 0 | 1.249760  | 5.679174  | 1.347740  |
| 90 | 6 | 0 | 0.626404  | 3.344593  | 2.119169  |
| 91 | 1 | 0 | 0.119370  | 4.147643  | 2.661485  |
| 92 | 1 | 0 | 0.019950  | 2.441085  | 2.161445  |
| 93 | 6 | 0 | 1.989083  | 3.099733  | 2.768582  |
| 94 | 1 | 0 | 1.794691  | 3.001381  | 3.842741  |
| 95 | 1 | 0 | 2.610298  | 3.997424  | 2.670735  |
| 96 | 6 | 0 | 2.863690  | 1.939776  | 2.289888  |
| 97 | 1 | 0 | 2.995497  | 1.988391  | 1.211112  |
| 98 | 1 | 0 | 3.840142  | 2.016293  | 2.776505  |



|     |   |   |           |           |           |
|-----|---|---|-----------|-----------|-----------|
| 99  | 6 | 0 | 2.220221  | 0.231262  | 4.104512  |
| 100 | 1 | 0 | 2.924651  | 0.903453  | 4.596224  |
| 101 | 6 | 0 | 0.789244  | 0.365021  | 4.642210  |
| 102 | 1 | 0 | 0.192228  | 1.089805  | 4.087690  |
| 103 | 1 | 0 | 0.866820  | 0.714016  | 5.679569  |
| 104 | 6 | 0 | 0.205791  | -1.059231 | 4.611499  |
| 105 | 1 | 0 | -0.165697 | -1.277954 | 3.605912  |
| 106 | 1 | 0 | -0.622507 | -1.190024 | 5.315935  |
| 107 | 6 | 0 | 1.410508  | -1.956538 | 4.943214  |
| 108 | 1 | 0 | 1.282748  | -2.991825 | 4.607695  |
| 109 | 1 | 0 | 1.568224  | -1.983587 | 6.027999  |
| 110 | 6 | 0 | 2.616620  | -1.270452 | 4.265232  |
| 111 | 1 | 0 | 3.517206  | -1.351251 | 4.880806  |
| 112 | 6 | 0 | 2.955128  | -1.758799 | 2.841651  |
| 113 | 1 | 0 | 2.071876  | -2.137680 | 2.321737  |
| 114 | 1 | 0 | 3.728488  | -2.530462 | 2.834360  |
| 115 | 6 | 0 | 3.435526  | -0.471820 | 2.174285  |
| 116 | 1 | 0 | 4.348549  | -0.138656 | 2.677715  |
| 117 | 6 | 0 | 3.728665  | -0.550128 | 0.675850  |
| 118 | 6 | 0 | 5.412214  | -1.243823 | -0.904850 |
| 119 | 6 | 0 | 5.946494  | -0.163791 | -1.655657 |
| 120 | 6 | 0 | 6.366325  | -0.397222 | -2.977755 |
| 121 | 1 | 0 | 6.766229  | 0.406980  | -3.581050 |
| 122 | 6 | 0 | 6.284058  | -1.668576 | -3.537485 |
| 123 | 1 | 0 | 6.616740  | -1.831922 | -4.554571 |
| 124 | 6 | 0 | 5.776573  | -2.731244 | -2.796182 |
| 125 | 1 | 0 | 5.727717  | -3.707223 | -3.260881 |
| 126 | 6 | 0 | 5.329990  | -2.540351 | -1.475976 |
| 127 | 6 | 0 | 4.755338  | -3.720540 | -0.698056 |
| 128 | 1 | 0 | 4.418293  | -3.400899 | 0.309994  |
| 129 | 6 | 0 | 5.816601  | -4.803601 | -0.477008 |
| 130 | 1 | 0 | 5.407867  | -5.613813 | 0.164494  |
| 131 | 1 | 0 | 6.701266  | -4.371179 | 0.037589  |
| 132 | 1 | 0 | 6.145639  | -5.251348 | -1.438547 |
| 133 | 6 | 0 | 3.520350  | -4.298009 | -1.399596 |
| 134 | 1 | 0 | 2.785279  | -3.490644 | -1.599229 |
| 135 | 1 | 0 | 3.032851  | -5.058833 | -0.752853 |
| 136 | 1 | 0 | 3.788365  | -4.780462 | -2.363106 |
| 137 | 6 | 0 | 6.077416  | 1.235779  | -1.059758 |
| 138 | 1 | 0 | 5.752547  | 1.243151  | 0.001544  |
| 139 | 6 | 0 | 7.536705  | 1.707213  | -1.057337 |
| 140 | 1 | 0 | 8.176684  | 0.966149  | -0.532086 |
| 141 | 1 | 0 | 7.623248  | 2.676103  | -0.520097 |
| 142 | 1 | 0 | 7.921776  | 1.847082  | -2.089260 |

|     |    |   |          |           |           |
|-----|----|---|----------|-----------|-----------|
| 143 | 6  | 0 | 5.178778 | 2.235301  | -1.796747 |
| 144 | 1  | 0 | 5.487370 | 2.352685  | -2.856992 |
| 145 | 1  | 0 | 5.234056 | 3.229526  | -1.304878 |
| 146 | 1  | 0 | 4.122657 | 1.892682  | -1.767649 |
| 147 | 8  | 0 | 2.937208 | -0.221835 | -0.221913 |
| 148 | 20 | 0 | 0.657778 | 0.528504  | -0.339391 |

---

### L3a-Ca(II)-COM-1

Zero-point correction= 1.17582 a.u.

Thermal correction to Gibbs Free Energy= 1.06975 a.u.

Sum of electronic and zero-point Energies= -6962.19294 a.u.

Sum of electronic and thermal Free Energies= -6962.29900 a.u.

The number of imaginary frequencies 0

Standard orientation

---

| Center<br>Number | Atomic<br>Number | Atomic<br>Type | Coordinates (Angstroms) |           |           |
|------------------|------------------|----------------|-------------------------|-----------|-----------|
|                  |                  |                | X                       | Y         | Z         |
| 1                | 6                | 0              | -1.895454               | -1.332716 | 1.663511  |
| 2                | 6                | 0              | -2.688942               | -1.950301 | 0.473001  |
| 3                | 6                | 0              | -3.912280               | -2.483462 | 1.079670  |
| 4                | 6                | 0              | -3.850313               | -2.195647 | 2.460493  |
| 5                | 7                | 0              | -2.646326               | -1.519931 | 2.776533  |
| 6                | 8                | 0              | -2.290126               | -1.939762 | -0.671288 |
| 7                | 8                | 0              | -0.794473               | -0.789678 | 1.597856  |
| 8                | 6                | 0              | -2.250998               | -1.139502 | 4.124563  |
| 9                | 6                | 0              | -5.024948               | -3.144239 | 0.566614  |
| 10               | 6                | 0              | -4.869386               | -2.543448 | 3.328947  |
| 11               | 6                | 0              | -5.980272               | -3.203434 | 2.780299  |
| 12               | 6                | 0              | -6.069831               | -3.507562 | 1.420335  |
| 13               | 1                | 0              | -2.064160               | -2.032285 | 4.730032  |
| 14               | 1                | 0              | -1.337824               | -0.547580 | 4.055571  |
| 15               | 1                | 0              | -3.038360               | -0.543633 | 4.593672  |
| 16               | 1                | 0              | -4.821087               | -2.319866 | 4.388647  |
| 17               | 1                | 0              | -6.798396               | -3.489963 | 3.434248  |
| 18               | 1                | 0              | -6.941457               | -4.021166 | 1.031100  |
| 19               | 8                | 0              | 1.163366                | 1.622439  | 1.929623  |
| 20               | 8                | 0              | 2.976198                | 0.001232  | 0.490735  |
| 21               | 8                | 0              | 1.186346                | 2.309650  | -1.298219 |
| 22               | 7                | 0              | 4.473432                | -0.892538 | 1.946685  |
| 23               | 1                | 0              | 5.012200                | -0.782340 | 2.797793  |
| 24               | 7                | 0              | 2.361095                | 2.215576  | 2.253208  |

|    |   |   |           |           |           |
|----|---|---|-----------|-----------|-----------|
| 25 | 7 | 0 | -3.057704 | 2.936676  | -1.104877 |
| 26 | 1 | 0 | -3.326135 | 3.712721  | -1.699838 |
| 27 | 7 | 0 | 0.621003  | 3.555830  | -1.248023 |
| 28 | 6 | 0 | 4.765952  | -2.002101 | 1.120617  |
| 29 | 6 | 0 | 5.882790  | -1.956857 | 0.246742  |
| 30 | 6 | 0 | 6.141626  | -3.061788 | -0.584588 |
| 31 | 1 | 0 | 6.977359  | -3.053031 | -1.271715 |
| 32 | 6 | 0 | 5.322394  | -4.185769 | -0.551869 |
| 33 | 1 | 0 | 5.533030  | -5.024741 | -1.202543 |
| 34 | 6 | 0 | 4.228452  | -4.232471 | 0.306688  |
| 35 | 1 | 0 | 3.606951  | -5.118000 | 0.301038  |
| 36 | 6 | 0 | 3.931171  | -3.150255 | 1.154977  |
| 37 | 6 | 0 | 2.721942  | -3.231869 | 2.082685  |
| 38 | 1 | 0 | 2.655888  | -2.327534 | 2.721756  |
| 39 | 6 | 0 | 1.416620  | -3.296033 | 1.280966  |
| 40 | 1 | 0 | 1.327921  | -2.405367 | 0.622380  |
| 41 | 1 | 0 | 0.546181  | -3.302665 | 1.971099  |
| 42 | 1 | 0 | 1.370624  | -4.212372 | 0.655456  |
| 43 | 6 | 0 | 2.834533  | -4.420996 | 3.044469  |
| 44 | 1 | 0 | 2.007780  | -4.390546 | 3.786470  |
| 45 | 1 | 0 | 3.795569  | -4.373714 | 3.600076  |
| 46 | 1 | 0 | 2.779420  | -5.389194 | 2.503762  |
| 47 | 6 | 0 | 6.783634  | -0.728381 | 0.167863  |
| 48 | 1 | 0 | 6.469814  | 0.037533  | 0.907424  |
| 49 | 6 | 0 | 8.237285  | -1.079857 | 0.507047  |
| 50 | 1 | 0 | 8.288179  | -1.582567 | 1.496574  |
| 51 | 1 | 0 | 8.850732  | -0.154774 | 0.560138  |
| 52 | 1 | 0 | 8.684609  | -1.748707 | -0.258096 |
| 53 | 6 | 0 | 6.685069  | -0.065014 | -1.210645 |
| 54 | 1 | 0 | 7.053642  | -0.739115 | -2.012563 |
| 55 | 1 | 0 | 7.289885  | 0.866898  | -1.230672 |
| 56 | 1 | 0 | 5.630145  | 0.207953  | -1.428336 |
| 57 | 6 | 0 | 3.576438  | 0.045388  | 1.573532  |
| 58 | 6 | 0 | 3.399076  | 1.150079  | 2.617954  |
| 59 | 1 | 0 | 4.359304  | 1.669460  | 2.717909  |
| 60 | 6 | 0 | 2.927858  | 0.683026  | 3.995577  |
| 61 | 1 | 0 | 3.687708  | 0.090614  | 4.510375  |
| 62 | 1 | 0 | 2.025599  | 0.075221  | 3.883939  |
| 63 | 6 | 0 | 2.637120  | 2.008843  | 4.720703  |
| 64 | 1 | 0 | 3.555046  | 2.348464  | 5.209945  |
| 65 | 6 | 0 | 1.450101  | 1.978757  | 5.707804  |
| 66 | 1 | 0 | 1.332146  | 0.997541  | 6.181325  |
| 67 | 1 | 0 | 1.620251  | 2.708646  | 6.508684  |
| 68 | 6 | 0 | 0.233981  | 2.400216  | 4.866303  |

|     |   |   |           |           |           |
|-----|---|---|-----------|-----------|-----------|
| 69  | 1 | 0 | -0.593443 | 2.776358  | 5.477331  |
| 70  | 1 | 0 | -0.134685 | 1.554851  | 4.276270  |
| 71  | 6 | 0 | 0.802752  | 3.469067  | 3.917041  |
| 72  | 1 | 0 | 0.191730  | 3.617817  | 3.027256  |
| 73  | 1 | 0 | 0.881382  | 4.430230  | 4.441020  |
| 74  | 6 | 0 | 2.233116  | 3.009234  | 3.596735  |
| 75  | 1 | 0 | 2.935139  | 3.839157  | 3.509042  |
| 76  | 6 | 0 | 2.889297  | 3.091127  | 1.126960  |
| 77  | 1 | 0 | 3.876410  | 3.436085  | 1.449594  |
| 78  | 1 | 0 | 2.998277  | 2.434148  | 0.267976  |
| 79  | 6 | 0 | 2.039125  | 4.313225  | 0.771283  |
| 80  | 1 | 0 | 2.655564  | 4.921806  | 0.100245  |
| 81  | 1 | 0 | 1.890062  | 4.932238  | 1.663097  |
| 82  | 6 | 0 | 0.650735  | 4.117879  | 0.159328  |
| 83  | 1 | 0 | 0.066427  | 3.424719  | 0.761420  |
| 84  | 1 | 0 | 0.141139  | 5.085084  | 0.118089  |
| 85  | 6 | 0 | 1.295240  | 4.490884  | -2.301746 |
| 86  | 1 | 0 | 1.200880  | 5.499623  | -1.895313 |
| 87  | 6 | 0 | 2.744627  | 4.108654  | -2.635417 |
| 88  | 1 | 0 | 3.257637  | 3.613977  | -1.810295 |
| 89  | 1 | 0 | 3.280379  | 5.040782  | -2.857243 |
| 90  | 6 | 0 | 2.658790  | 3.234290  | -3.898952 |
| 91  | 1 | 0 | 2.433304  | 2.202302  | -3.617862 |
| 92  | 1 | 0 | 3.593210  | 3.234585  | -4.471194 |
| 93  | 6 | 0 | 1.485066  | 3.840761  | -4.688100 |
| 94  | 1 | 0 | 1.040688  | 3.137301  | -5.400742 |
| 95  | 1 | 0 | 1.825175  | 4.713529  | -5.259431 |
| 96  | 6 | 0 | 0.471715  | 4.293709  | -3.613442 |
| 97  | 1 | 0 | -0.006883 | 5.237677  | -3.892174 |
| 98  | 6 | 0 | -0.631975 | 3.275374  | -3.254687 |
| 99  | 1 | 0 | -0.306244 | 2.244326  | -3.413147 |
| 100 | 1 | 0 | -1.555733 | 3.444788  | -3.813204 |
| 101 | 6 | 0 | -0.822931 | 3.533227  | -1.760161 |
| 102 | 1 | 0 | -1.205235 | 4.549994  | -1.620958 |
| 103 | 6 | 0 | -1.755950 | 2.575197  | -1.023336 |
| 104 | 6 | 0 | -4.075358 | 2.065109  | -0.650670 |
| 105 | 6 | 0 | -4.416739 | 2.036437  | 0.727390  |
| 106 | 6 | 0 | -5.371481 | 1.104740  | 1.173024  |
| 107 | 1 | 0 | -5.644374 | 1.048433  | 2.218602  |
| 108 | 6 | 0 | -5.987236 | 0.234020  | 0.280115  |
| 109 | 1 | 0 | -6.719970 | -0.476655 | 0.639973  |
| 110 | 6 | 0 | -5.663612 | 0.269691  | -1.072443 |
| 111 | 1 | 0 | -6.154991 | -0.427394 | -1.737945 |
| 112 | 6 | 0 | -4.712094 | 1.182585  | -1.562548 |

|     |    |   |           |           |           |
|-----|----|---|-----------|-----------|-----------|
| 113 | 6  | 0 | -4.361953 | 1.178290  | -3.047872 |
| 114 | 1  | 0 | -3.647769 | 1.992325  | -3.285867 |
| 115 | 6  | 0 | -5.600200 | 1.432921  | -3.916483 |
| 116 | 1  | 0 | -5.301278 | 1.551939  | -4.980079 |
| 117 | 1  | 0 | -6.106659 | 2.368561  | -3.595948 |
| 118 | 1  | 0 | -6.323746 | 0.593167  | -3.853147 |
| 119 | 6  | 0 | -3.670302 | -0.130375 | -3.444164 |
| 120 | 1  | 0 | -2.751531 | -0.273132 | -2.836975 |
| 121 | 1  | 0 | -3.368001 | -0.095487 | -4.512785 |
| 122 | 1  | 0 | -4.340726 | -1.003017 | -3.297245 |
| 123 | 6  | 0 | -3.784045 | 3.001901  | 1.725971  |
| 124 | 1  | 0 | -3.089773 | 3.699313  | 1.212041  |
| 125 | 6  | 0 | -4.846886 | 3.880603  | 2.396661  |
| 126 | 1  | 0 | -5.454148 | 4.401574  | 1.625486  |
| 127 | 1  | 0 | -4.359012 | 4.653148  | 3.029020  |
| 128 | 1  | 0 | -5.523974 | 3.281303  | 3.041353  |
| 129 | 6  | 0 | -2.954140 | 2.251901  | 2.773515  |
| 130 | 1  | 0 | -3.591923 | 1.582264  | 3.386780  |
| 131 | 1  | 0 | -2.455572 | 2.976216  | 3.451786  |
| 132 | 1  | 0 | -2.166803 | 1.648041  | 2.276413  |
| 133 | 8  | 0 | -1.388353 | 1.569661  | -0.401864 |
| 134 | 20 | 0 | 0.662855  | 0.386168  | -0.051289 |
| 135 | 8  | 0 | 0.949626  | -0.889941 | -2.006807 |
| 136 | 16 | 0 | 1.339865  | -1.422514 | -3.351700 |
| 137 | 8  | 0 | 0.343679  | -2.332615 | -3.940675 |
| 138 | 8  | 0 | 1.926853  | -0.411472 | -4.250375 |
| 139 | 6  | 0 | 2.765787  | -2.524124 | -2.901920 |
| 140 | 9  | 0 | 2.366405  | -3.488683 | -2.057991 |
| 141 | 9  | 0 | 3.279482  | -3.108381 | -3.995510 |
| 142 | 9  | 0 | 3.740792  | -1.818511 | -2.307216 |
| 143 | 35 | 0 | -5.134507 | -3.560054 | -1.281887 |

---

**L3a-Ca(II)-IM1-si-1**

Zero-point correction= 1.28765 a.u.

Thermal correction to Gibbs Free Energy= 1.17095 a.u.

Sum of electronic and zero-point Energies= -7194.60971 a.u.

Sum of electronic and thermal Free Energies= -7194.72642 a.u.

The number of imaginary frequencies        0

Standard orientation

---

| Center | Atomic | Atomic | Coordinates (Angstroms) |   |   |
|--------|--------|--------|-------------------------|---|---|
| Number | Number | Type   | X                       | Y | Z |

---

|    |   |   |           |           |           |
|----|---|---|-----------|-----------|-----------|
| 1  | 6 | 0 | 1.916751  | 0.780998  | 1.484799  |
| 2  | 6 | 0 | 3.081253  | 0.994688  | 0.467020  |
| 3  | 6 | 0 | 4.240055  | 1.333447  | 1.304062  |
| 4  | 6 | 0 | 3.816977  | 1.279663  | 2.648268  |
| 5  | 7 | 0 | 2.441267  | 0.953380  | 2.722822  |
| 6  | 8 | 0 | 2.971467  | 0.853832  | -0.730092 |
| 7  | 8 | 0 | 0.750123  | 0.502276  | 1.218321  |
| 8  | 6 | 0 | 1.687182  | 0.851792  | 3.963028  |
| 9  | 6 | 0 | 5.564509  | 1.645856  | 1.017818  |
| 10 | 6 | 0 | 4.684121  | 1.515105  | 3.700890  |
| 11 | 6 | 0 | 6.016709  | 1.816080  | 3.378634  |
| 12 | 6 | 0 | 6.465221  | 1.886889  | 2.057921  |
| 13 | 1 | 0 | 1.661889  | 1.821052  | 4.470733  |
| 14 | 1 | 0 | 0.671705  | 0.545052  | 3.712870  |
| 15 | 1 | 0 | 2.142634  | 0.107105  | 4.622103  |
| 16 | 1 | 0 | 4.356426  | 1.471146  | 4.733409  |
| 17 | 1 | 0 | 6.723136  | 2.004418  | 4.181526  |
| 18 | 1 | 0 | 7.499445  | 2.129436  | 1.841584  |
| 19 | 6 | 0 | 1.637296  | 4.471988  | -0.110788 |
| 20 | 6 | 0 | 2.790762  | 4.711244  | -0.755048 |
| 21 | 8 | 0 | 3.702509  | 5.530369  | -0.135000 |
| 22 | 6 | 0 | 5.042018  | 5.593655  | -0.621453 |
| 23 | 6 | 0 | 3.109319  | 4.161856  | -2.117728 |
| 24 | 1 | 0 | 0.854945  | 3.890853  | -0.584244 |
| 25 | 1 | 0 | 1.452077  | 4.897573  | 0.871612  |
| 26 | 1 | 0 | 5.554968  | 6.312303  | 0.022769  |
| 27 | 1 | 0 | 5.550304  | 4.625187  | -0.545447 |
| 28 | 1 | 0 | 5.094674  | 5.949858  | -1.656735 |
| 29 | 1 | 0 | 3.336665  | 4.964139  | -2.830993 |
| 30 | 1 | 0 | 3.974983  | 3.489591  | -2.089088 |
| 31 | 1 | 0 | 2.257257  | 3.594227  | -2.499171 |
| 32 | 8 | 0 | -1.812625 | -1.643890 | 1.931388  |
| 33 | 8 | 0 | -3.241999 | 0.269123  | 0.414664  |
| 34 | 8 | 0 | -1.919766 | -2.350856 | -1.280321 |
| 35 | 7 | 0 | -4.703261 | 1.391528  | 1.742812  |
| 36 | 1 | 0 | -5.215272 | 1.429239  | 2.616493  |
| 37 | 7 | 0 | -3.111209 | -1.986616 | 2.231644  |
| 38 | 7 | 0 | 2.102284  | -3.848562 | -0.986773 |
| 39 | 1 | 0 | 2.207322  | -4.671166 | -1.570254 |
| 40 | 7 | 0 | -1.617010 | -3.685255 | -1.222679 |
| 41 | 6 | 0 | -4.719221 | 2.540609  | 0.920411  |
| 42 | 6 | 0 | -5.646047 | 2.630264  | -0.149664 |
| 43 | 6 | 0 | -5.612381 | 3.761673  | -0.985241 |
| 44 | 1 | 0 | -6.297021 | 3.855106  | -1.817789 |

|    |   |   |           |           |           |
|----|---|---|-----------|-----------|-----------|
| 45 | 6 | 0 | -4.691728 | 4.782014  | -0.766274 |
| 46 | 1 | 0 | -4.675513 | 5.642950  | -1.422100 |
| 47 | 6 | 0 | -3.787498 | 4.697988  | 0.288091  |
| 48 | 1 | 0 | -3.079686 | 5.504696  | 0.425897  |
| 49 | 6 | 0 | -3.786189 | 3.585220  | 1.148711  |
| 50 | 6 | 0 | -2.771473 | 3.512642  | 2.286343  |
| 51 | 1 | 0 | -2.931789 | 2.602087  | 2.898984  |
| 52 | 6 | 0 | -1.342585 | 3.421716  | 1.739965  |
| 53 | 1 | 0 | -1.249682 | 2.546031  | 1.063029  |
| 54 | 1 | 0 | -0.619488 | 3.289025  | 2.573426  |
| 55 | 1 | 0 | -1.072042 | 4.341682  | 1.181336  |
| 56 | 6 | 0 | -2.920309 | 4.699883  | 3.245310  |
| 57 | 1 | 0 | -2.256768 | 4.563432  | 4.126199  |
| 58 | 1 | 0 | -3.967265 | 4.766163  | 3.611332  |
| 59 | 1 | 0 | -2.650231 | 5.657780  | 2.753073  |
| 60 | 6 | 0 | -6.658733 | 1.521588  | -0.420608 |
| 61 | 1 | 0 | -6.584706 | 0.726015  | 0.350276  |
| 62 | 6 | 0 | -8.096446 | 2.050460  | -0.350423 |
| 63 | 1 | 0 | -8.270829 | 2.555775  | 0.623902  |
| 64 | 1 | 0 | -8.816794 | 1.208614  | -0.433692 |
| 65 | 1 | 0 | -8.306611 | 2.769463  | -1.169966 |
| 66 | 6 | 0 | -6.385584 | 0.845264  | -1.768996 |
| 67 | 1 | 0 | -6.495121 | 1.560476  | -2.611480 |
| 68 | 1 | 0 | -7.096348 | 0.006189  | -1.927465 |
| 69 | 1 | 0 | -5.357054 | 0.425580  | -1.783206 |
| 70 | 6 | 0 | -3.902762 | 0.341781  | 1.460466  |
| 71 | 6 | 0 | -3.937876 | -0.737938 | 2.543289  |
| 72 | 1 | 0 | -4.977654 | -1.071076 | 2.638761  |
| 73 | 6 | 0 | -3.416360 | -0.325102 | 3.919772  |
| 74 | 1 | 0 | -4.061362 | 0.417310  | 4.396024  |
| 75 | 1 | 0 | -2.412027 | 0.095799  | 3.819965  |
| 76 | 6 | 0 | -3.404728 | -1.662453 | 4.683463  |
| 77 | 1 | 0 | -4.383994 | -1.804833 | 5.150187  |
| 78 | 6 | 0 | -2.262538 | -1.836552 | 5.707033  |
| 79 | 1 | 0 | -1.969609 | -0.884993 | 6.164593  |
| 80 | 1 | 0 | -2.593631 | -2.498727 | 6.516212  |
| 81 | 6 | 0 | -1.128102 | -2.505997 | 4.913825  |
| 82 | 1 | 0 | -0.406018 | -3.018528 | 5.558528  |
| 83 | 1 | 0 | -0.587092 | -1.760794 | 4.322276  |
| 84 | 6 | 0 | -1.864660 | -3.469157 | 3.966089  |
| 85 | 1 | 0 | -1.271058 | -3.751338 | 3.096560  |
| 86 | 1 | 0 | -2.138729 | -4.385425 | 4.504128  |
| 87 | 6 | 0 | -3.171595 | -2.753252 | 3.594404  |
| 88 | 1 | 0 | -4.017377 | -3.435940 | 3.503597  |

|     |   |   |           |           |           |
|-----|---|---|-----------|-----------|-----------|
| 89  | 6 | 0 | -3.777430 | -2.766564 | 1.108268  |
| 90  | 1 | 0 | -4.817609 | -2.906493 | 1.417244  |
| 91  | 1 | 0 | -3.741850 | -2.117345 | 0.237297  |
| 92  | 6 | 0 | -3.178832 | -4.137106 | 0.785723  |
| 93  | 1 | 0 | -3.897761 | -4.626966 | 0.119466  |
| 94  | 1 | 0 | -3.157846 | -4.755306 | 1.690421  |
| 95  | 6 | 0 | -1.775698 | -4.224673 | 0.185836  |
| 96  | 1 | 0 | -1.071427 | -3.658810 | 0.792799  |
| 97  | 1 | 0 | -1.467295 | -5.273485 | 0.153561  |
| 98  | 6 | 0 | -2.450985 | -4.460255 | -2.290614 |
| 99  | 1 | 0 | -2.574290 | -5.468006 | -1.889472 |
| 100 | 6 | 0 | -3.784391 | -3.785611 | -2.644786 |
| 101 | 1 | 0 | -4.206221 | -3.209562 | -1.820679 |
| 102 | 1 | 0 | -4.491960 | -4.586836 | -2.894963 |
| 103 | 6 | 0 | -3.493957 | -2.932215 | -3.892143 |
| 104 | 1 | 0 | -3.057178 | -1.976533 | -3.589082 |
| 105 | 1 | 0 | -4.397052 | -2.725207 | -4.476851 |
| 106 | 6 | 0 | -2.463500 | -3.766975 | -4.672357 |
| 107 | 1 | 0 | -1.871228 | -3.170113 | -5.374293 |
| 108 | 1 | 0 | -2.973667 | -4.545082 | -5.253662 |
| 109 | 6 | 0 | -1.583642 | -4.429819 | -3.588899 |
| 110 | 1 | 0 | -1.309364 | -5.450739 | -3.871324 |
| 111 | 6 | 0 | -0.295994 | -3.667305 | -3.206621 |
| 112 | 1 | 0 | -0.390937 | -2.590478 | -3.367425 |
| 113 | 1 | 0 | 0.580103  | -4.029927 | -3.749285 |
| 114 | 6 | 0 | -0.189748 | -3.959764 | -1.710598 |
| 115 | 1 | 0 | -0.030241 | -5.034254 | -1.568605 |
| 116 | 6 | 0 | 0.906217  | -3.214050 | -0.951853 |
| 117 | 6 | 0 | 3.278466  | -3.200470 | -0.539724 |
| 118 | 6 | 0 | 3.576240  | -3.148183 | 0.849277  |
| 119 | 6 | 0 | 4.731227  | -2.465905 | 1.272700  |
| 120 | 1 | 0 | 4.983020  | -2.401137 | 2.323049  |
| 121 | 6 | 0 | 5.581161  | -1.864295 | 0.351641  |
| 122 | 1 | 0 | 6.468916  | -1.349375 | 0.695130  |
| 123 | 6 | 0 | 5.294514  | -1.918430 | -1.008266 |
| 124 | 1 | 0 | 5.975147  | -1.436342 | -1.697139 |
| 125 | 6 | 0 | 4.144466  | -2.578308 | -1.477777 |
| 126 | 6 | 0 | 3.848733  | -2.593366 | -2.975054 |
| 127 | 1 | 0 | 2.918670  | -3.157168 | -3.189233 |
| 128 | 6 | 0 | 4.965754  | -3.298389 | -3.753232 |
| 129 | 1 | 0 | 4.681434  | -3.397859 | -4.822739 |
| 130 | 1 | 0 | 5.129179  | -4.319091 | -3.345896 |
| 131 | 1 | 0 | 5.919747  | -2.732876 | -3.698136 |
| 132 | 6 | 0 | 3.615810  | -1.175236 | -3.508678 |



|     |    |   |           |           |           |
|-----|----|---|-----------|-----------|-----------|
| 133 | 1  | 0 | 2.771024  | -0.699891 | -2.966504 |
| 134 | 1  | 0 | 3.348668  | -1.211063 | -4.586631 |
| 135 | 1  | 0 | 4.520911  | -0.542414 | -3.394395 |
| 136 | 6  | 0 | 2.687877  | -3.829670 | 1.886517  |
| 137 | 1  | 0 | 1.841714  | -4.353601 | 1.395715  |
| 138 | 6  | 0 | 3.460897  | -4.905739 | 2.658670  |
| 139 | 1  | 0 | 3.911888  | -5.634404 | 1.951280  |
| 140 | 1  | 0 | 2.771946  | -5.462615 | 3.329699  |
| 141 | 1  | 0 | 4.267229  | -4.461579 | 3.279575  |
| 142 | 6  | 0 | 2.070988  | -2.805954 | 2.846707  |
| 143 | 1  | 0 | 2.852054  | -2.265709 | 3.421532  |
| 144 | 1  | 0 | 1.402287  | -3.320553 | 3.567841  |
| 145 | 1  | 0 | 1.464673  | -2.068635 | 2.281562  |
| 146 | 8  | 0 | 0.742004  | -2.145653 | -0.350743 |
| 147 | 20 | 0 | -1.026797 | -0.571817 | -0.042196 |
| 148 | 8  | 0 | -0.599812 | 0.647328  | -1.998687 |
| 149 | 16 | 0 | -0.856585 | 1.432348  | -3.249542 |
| 150 | 8  | 0 | 0.291185  | 2.248119  | -3.681887 |
| 151 | 8  | 0 | -1.562480 | 0.671329  | -4.295359 |
| 152 | 6  | 0 | -2.103526 | 2.671557  | -2.649329 |
| 153 | 9  | 0 | -1.609639 | 3.374358  | -1.614558 |
| 154 | 9  | 0 | -2.433763 | 3.531963  | -3.622356 |
| 155 | 9  | 0 | -3.218469 | 2.049070  | -2.236820 |
| 156 | 35 | 0 | 6.161669  | 1.766483  | -0.782150 |

---

### L3a-Ca(II)-TS-si-1

Zero-point correction= 1.28694 a.u.

Thermal correction to Gibbs Free Energy= 1.17025 a.u.

Sum of electronic and zero-point Energies= -7194.58814 a.u.

Sum of electronic and thermal Free Energies= -7194.70483a.u.

The number of imaginary frequencies 1

Standard orientation

---

| Center<br>Number | Atomic<br>Number | Atomic<br>Type | Coordinates (Angstroms) |           |           |
|------------------|------------------|----------------|-------------------------|-----------|-----------|
|                  |                  |                | X                       | Y         | Z         |
| 1                | 6                | 0              | -1.689490               | -1.049431 | 1.442790  |
| 2                | 6                | 0              | -2.802911               | -1.515168 | 0.453230  |
| 3                | 6                | 0              | -3.976719               | -1.717069 | 1.421426  |
| 4                | 6                | 0              | -3.523720               | -1.497680 | 2.731906  |
| 5                | 7                | 0              | -2.158098               | -1.133865 | 2.712604  |
| 6                | 8                | 0              | -2.997000               | -0.717247 | -0.581978 |
| 7                | 8                | 0              | -0.546430               | -0.690186 | 1.138276  |

|    |   |   |           |           |           |
|----|---|---|-----------|-----------|-----------|
| 8  | 6 | 0 | -1.380440 | -0.817435 | 3.899413  |
| 9  | 6 | 0 | -5.326686 | -1.957076 | 1.239166  |
| 10 | 6 | 0 | -4.348882 | -1.576923 | 3.845839  |
| 11 | 6 | 0 | -5.701456 | -1.864577 | 3.623100  |
| 12 | 6 | 0 | -6.198802 | -2.041878 | 2.332814  |
| 13 | 1 | 0 | -1.247439 | -1.711971 | 4.517257  |
| 14 | 1 | 0 | -0.407788 | -0.449313 | 3.573875  |
| 15 | 1 | 0 | -1.883899 | -0.046251 | 4.490104  |
| 16 | 1 | 0 | -3.970233 | -1.408414 | 4.848306  |
| 17 | 1 | 0 | -6.380545 | -1.933344 | 4.468014  |
| 18 | 1 | 0 | -7.253847 | -2.234472 | 2.172233  |
| 19 | 6 | 0 | -2.157055 | -3.025789 | 0.011345  |
| 20 | 6 | 0 | -2.897404 | -3.510505 | -1.141533 |
| 21 | 8 | 0 | -3.714978 | -4.518846 | -0.915216 |
| 22 | 6 | 0 | -4.514046 | -5.059997 | -1.990775 |
| 23 | 6 | 0 | -2.871223 | -2.691017 | -2.305009 |
| 24 | 1 | 0 | -1.138114 | -2.765481 | -0.279823 |
| 25 | 1 | 0 | -2.171396 | -3.709319 | 0.861250  |
| 26 | 1 | 0 | -4.942115 | -5.979444 | -1.591378 |
| 27 | 1 | 0 | -5.310977 | -4.363082 | -2.255567 |
| 28 | 1 | 0 | -3.885843 | -5.278265 | -2.857900 |
| 29 | 1 | 0 | -1.868782 | -2.437188 | -2.659345 |
| 30 | 1 | 0 | -3.550959 | -2.935927 | -3.118789 |
| 31 | 1 | 0 | -3.120640 | -1.633326 | -1.709407 |
| 32 | 8 | 0 | 1.768840  | 1.551732  | 1.964749  |
| 33 | 8 | 0 | 3.127355  | -0.383291 | 0.434358  |
| 34 | 8 | 0 | 1.900152  | 2.456424  | -1.231495 |
| 35 | 7 | 0 | 4.586333  | -1.551621 | 1.721773  |
| 36 | 1 | 0 | 5.116464  | -1.609433 | 2.583486  |
| 37 | 7 | 0 | 3.069054  | 1.851590  | 2.296052  |
| 38 | 7 | 0 | -2.152935 | 3.818677  | -0.909956 |
| 39 | 1 | 0 | -2.292917 | 4.629712  | -1.502291 |
| 40 | 7 | 0 | 1.600722  | 3.783499  | -1.065761 |
| 41 | 6 | 0 | 4.601649  | -2.673444 | 0.861378  |
| 42 | 6 | 0 | 5.528939  | -2.728782 | -0.210915 |
| 43 | 6 | 0 | 5.507556  | -3.840861 | -1.072668 |
| 44 | 1 | 0 | 6.193554  | -3.907859 | -1.906598 |
| 45 | 6 | 0 | 4.593741  | -4.872862 | -0.881769 |
| 46 | 1 | 0 | 4.585720  | -5.717653 | -1.558382 |
| 47 | 6 | 0 | 3.679999  | -4.816727 | 0.166096  |
| 48 | 1 | 0 | 2.971788  | -5.627210 | 0.276934  |
| 49 | 6 | 0 | 3.668674  | -3.725726 | 1.054116  |
| 50 | 6 | 0 | 2.632971  | -3.677280 | 2.172752  |
| 51 | 1 | 0 | 2.779324  | -2.777098 | 2.804365  |

|    |   |   |          |           |           |
|----|---|---|----------|-----------|-----------|
| 52 | 6 | 0 | 1.215895 | -3.577103 | 1.597538  |
| 53 | 1 | 0 | 1.157815 | -2.721025 | 0.893139  |
| 54 | 1 | 0 | 0.483050 | -3.405091 | 2.414968  |
| 55 | 1 | 0 | 0.931109 | -4.504858 | 1.057472  |
| 56 | 6 | 0 | 2.764388 | -4.881504 | 3.112192  |
| 57 | 1 | 0 | 2.077743 | -4.765678 | 3.978189  |
| 58 | 1 | 0 | 3.802197 | -4.948516 | 3.503390  |
| 59 | 1 | 0 | 2.513253 | -5.831698 | 2.595507  |
| 60 | 6 | 0 | 6.516958 | -1.595567 | -0.467458 |
| 61 | 1 | 0 | 6.436130 | -0.818555 | 0.321164  |
| 62 | 6 | 0 | 7.965947 | -2.095634 | -0.425861 |
| 63 | 1 | 0 | 8.162217 | -2.618332 | 0.534941  |
| 64 | 1 | 0 | 8.667450 | -1.236969 | -0.498646 |
| 65 | 1 | 0 | 8.181350 | -2.791849 | -1.263520 |
| 66 | 6 | 0 | 6.211354 | -0.897001 | -1.797365 |
| 67 | 1 | 0 | 6.348825 | -1.585896 | -2.657745 |
| 68 | 1 | 0 | 6.885409 | -0.024664 | -1.935069 |
| 69 | 1 | 0 | 5.164194 | -0.523982 | -1.800569 |
| 70 | 6 | 0 | 3.800181 | -0.483145 | 1.469274  |
| 71 | 6 | 0 | 3.859194 | 0.570589  | 2.577030  |
| 72 | 1 | 0 | 4.906947 | 0.870440  | 2.693881  |
| 73 | 6 | 0 | 3.309284 | 0.129371  | 3.934063  |
| 74 | 1 | 0 | 3.928274 | -0.646479 | 4.391668  |
| 75 | 1 | 0 | 2.295805 | -0.260965 | 3.807881  |
| 76 | 6 | 0 | 3.321346 | 1.440470  | 4.741299  |
| 77 | 1 | 0 | 4.297565 | 1.543161  | 5.224595  |
| 78 | 6 | 0 | 2.169588 | 1.608697  | 5.755437  |
| 79 | 1 | 0 | 1.847403 | 0.649433  | 6.176119  |
| 80 | 1 | 0 | 2.505663 | 2.234477  | 6.591177  |
| 81 | 6 | 0 | 1.062269 | 2.331926  | 4.970868  |
| 82 | 1 | 0 | 0.345525 | 2.842112  | 5.623469  |
| 83 | 1 | 0 | 0.509962 | 1.620362  | 4.349622  |
| 84 | 6 | 0 | 1.834796 | 3.306093  | 4.064374  |
| 85 | 1 | 0 | 1.258071 | 3.630395  | 3.198571  |
| 86 | 1 | 0 | 2.124001 | 4.197660  | 4.634978  |
| 87 | 6 | 0 | 3.129015 | 2.570743  | 3.685680  |
| 88 | 1 | 0 | 3.991691 | 3.235766  | 3.629239  |
| 89 | 6 | 0 | 3.761836 | 2.660264  | 1.209889  |
| 90 | 1 | 0 | 4.803941 | 2.763479  | 1.526800  |
| 91 | 1 | 0 | 3.717331 | 2.049916  | 0.311102  |
| 92 | 6 | 0 | 3.196033 | 4.058942  | 0.946451  |
| 93 | 1 | 0 | 3.919558 | 4.553575  | 0.288583  |
| 94 | 1 | 0 | 3.208919 | 4.640782  | 1.875098  |
| 95 | 6 | 0 | 1.785274 | 4.216129  | 0.375375  |

|     |   |   |           |          |           |
|-----|---|---|-----------|----------|-----------|
| 96  | 1 | 0 | 1.076310  | 3.624499 | 0.950588  |
| 97  | 1 | 0 | 1.500740  | 5.271592 | 0.418526  |
| 98  | 6 | 0 | 2.426546  | 4.640106 | -2.076534 |
| 99  | 1 | 0 | 2.566526  | 5.608042 | -1.591911 |
| 100 | 6 | 0 | 3.748690  | 3.986740 | -2.505713 |
| 101 | 1 | 0 | 4.166381  | 3.328773 | -1.743071 |
| 102 | 1 | 0 | 4.465532  | 4.798454 | -2.685445 |
| 103 | 6 | 0 | 3.435801  | 3.257321 | -3.824272 |
| 104 | 1 | 0 | 2.994787  | 2.280813 | -3.604962 |
| 105 | 1 | 0 | 4.330106  | 3.097767 | -4.436790 |
| 106 | 6 | 0 | 2.404349  | 4.169876 | -4.510635 |
| 107 | 1 | 0 | 1.800132  | 3.647524 | -5.260552 |
| 108 | 1 | 0 | 2.915307  | 4.996345 | -5.020181 |
| 109 | 6 | 0 | 1.541630  | 4.731812 | -3.359308 |
| 110 | 1 | 0 | 1.265857  | 5.774876 | -3.542701 |
| 111 | 6 | 0 | 0.258291  | 3.938974 | -3.031374 |
| 112 | 1 | 0 | 0.350006  | 2.880486 | -3.288423 |
| 113 | 1 | 0 | -0.623071 | 4.348426 | -3.530828 |
| 114 | 6 | 0 | 0.166491  | 4.094745 | -1.513806 |
| 115 | 1 | 0 | -0.000553 | 5.150367 | -1.272815 |
| 116 | 6 | 0 | -0.916798 | 3.275900 | -0.813953 |
| 117 | 6 | 0 | -3.294042 | 3.076815 | -0.518612 |
| 118 | 6 | 0 | -3.645244 | 2.987157 | 0.856188  |
| 119 | 6 | 0 | -4.757226 | 2.209174 | 1.226024  |
| 120 | 1 | 0 | -5.047106 | 2.114819 | 2.264427  |
| 121 | 6 | 0 | -5.512352 | 1.544631 | 0.266699  |
| 122 | 1 | 0 | -6.367409 | 0.954695 | 0.569550  |
| 123 | 6 | 0 | -5.170189 | 1.629059 | -1.078785 |
| 124 | 1 | 0 | -5.770016 | 1.085949 | -1.796842 |
| 125 | 6 | 0 | -4.063054 | 2.390285 | -1.496373 |
| 126 | 6 | 0 | -3.695227 | 2.425370 | -2.977444 |
| 127 | 1 | 0 | -2.832475 | 3.098204 | -3.153953 |
| 128 | 6 | 0 | -4.847642 | 2.977900 | -3.825557 |
| 129 | 1 | 0 | -4.515573 | 3.114743 | -4.877040 |
| 130 | 1 | 0 | -5.169142 | 3.967634 | -3.435969 |
| 131 | 1 | 0 | -5.720289 | 2.291405 | -3.825000 |
| 132 | 6 | 0 | -3.263306 | 1.039568 | -3.471634 |
| 133 | 1 | 0 | -2.388795 | 0.682680 | -2.886982 |
| 134 | 1 | 0 | -2.955983 | 1.092551 | -4.538037 |
| 135 | 1 | 0 | -4.087670 | 0.300937 | -3.381408 |
| 136 | 6 | 0 | -2.856866 | 3.724462 | 1.935556  |
| 137 | 1 | 0 | -2.033101 | 4.316651 | 1.485759  |
| 138 | 6 | 0 | -3.743749 | 4.730497 | 2.678841  |
| 139 | 1 | 0 | -4.221592 | 5.425350 | 1.955225  |

|     |    |   |           |           |           |
|-----|----|---|-----------|-----------|-----------|
| 140 | 1  | 0 | -3.129408 | 5.334433  | 3.380586  |
| 141 | 1  | 0 | -4.537896 | 4.219830  | 3.263451  |
| 142 | 6  | 0 | -2.205274 | 2.740930  | 2.915811  |
| 143 | 1  | 0 | -2.969500 | 2.162351  | 3.475764  |
| 144 | 1  | 0 | -1.579935 | 3.293805  | 3.648470  |
| 145 | 1  | 0 | -1.548860 | 2.032190  | 2.369224  |
| 146 | 8  | 0 | -0.705404 | 2.227813  | -0.193803 |
| 147 | 20 | 0 | 1.009031  | 0.605623  | -0.093975 |
| 148 | 8  | 0 | 0.553036  | -0.462293 | -2.160569 |
| 149 | 16 | 0 | 0.983549  | -1.201377 | -3.391653 |
| 150 | 8  | 0 | -0.145329 | -1.736300 | -4.175338 |
| 151 | 8  | 0 | 2.064840  | -0.545345 | -4.146964 |
| 152 | 6  | 0 | 1.786144  | -2.704494 | -2.650308 |
| 153 | 9  | 0 | 0.904701  | -3.400448 | -1.907099 |
| 154 | 9  | 0 | 2.263377  | -3.517057 | -3.602396 |
| 155 | 9  | 0 | 2.802196  | -2.335708 | -1.856098 |
| 156 | 35 | 0 | -6.070923 | -2.126179 | -0.519762 |

-----

**L3a-Ca(II)-IM2-si-1**

Zero-point correction= 1.29294 a.u.

Thermal correction to Gibbs Free Energy= 1.17737 a.u.

Sum of electronic and zero-point Energies= -7194.62430 a.u.

Sum of electronic and thermal Free Energies= -7194.73987 a.u.

The number of imaginary frequencies 0

Standard orientation

-----

| Center<br>Number | Atomic<br>Number | Atomic<br>Type | Coordinates (Angstroms) |           |           |
|------------------|------------------|----------------|-------------------------|-----------|-----------|
|                  |                  |                | X                       | Y         | Z         |
| 1                | 6                | 0              | -1.731036               | -0.986723 | 1.453462  |
| 2                | 6                | 0              | -2.774008               | -1.545632 | 0.452025  |
| 3                | 6                | 0              | -4.002766               | -1.666348 | 1.346053  |
| 4                | 6                | 0              | -3.606245               | -1.440969 | 2.673929  |
| 5                | 7                | 0              | -2.239777               | -1.080204 | 2.706309  |
| 6                | 8                | 0              | -2.918300               | -0.661177 | -0.628654 |
| 7                | 8                | 0              | -0.591527               | -0.602905 | 1.175731  |
| 8                | 6                | 0              | -1.495655               | -0.780016 | 3.918852  |
| 9                | 6                | 0              | -5.348679               | -1.877363 | 1.097627  |
| 10               | 6                | 0              | -4.481265               | -1.502362 | 3.749133  |
| 11               | 6                | 0              | -5.826494               | -1.768269 | 3.463880  |
| 12               | 6                | 0              | -6.268713               | -1.936611 | 2.152486  |
| 13               | 1                | 0              | -1.385478               | -1.684158 | 4.526544  |
| 14               | 1                | 0              | -0.512250               | -0.412609 | 3.627073  |

-----

|    |   |   |           |           |           |
|----|---|---|-----------|-----------|-----------|
| 15 | 1 | 0 | -2.013226 | -0.015575 | 4.505179  |
| 16 | 1 | 0 | -4.145806 | -1.333892 | 4.766635  |
| 17 | 1 | 0 | -6.545255 | -1.822486 | 4.276175  |
| 18 | 1 | 0 | -7.319921 | -2.103639 | 1.945337  |
| 19 | 6 | 0 | -2.158942 | -2.915595 | -0.002303 |
| 20 | 6 | 0 | -2.951781 | -3.649868 | -1.049288 |
| 21 | 8 | 0 | -3.866329 | -4.477816 | -0.473545 |
| 22 | 6 | 0 | -4.678789 | -5.268456 | -1.338066 |
| 23 | 6 | 0 | -2.759912 | -3.475928 | -2.368540 |
| 24 | 1 | 0 | -1.171815 | -2.678655 | -0.406784 |
| 25 | 1 | 0 | -2.031570 | -3.557865 | 0.875370  |
| 26 | 1 | 0 | -5.320003 | -5.864995 | -0.686168 |
| 27 | 1 | 0 | -5.300732 | -4.639289 | -1.983680 |
| 28 | 1 | 0 | -4.062021 | -5.931486 | -1.957074 |
| 29 | 1 | 0 | -1.961946 | -2.833053 | -2.724263 |
| 30 | 1 | 0 | -3.348546 | -3.990283 | -3.119748 |
| 31 | 1 | 0 | -3.217328 | -1.187869 | -1.394943 |
| 32 | 8 | 0 | 1.826561  | 1.521851  | 1.983990  |
| 33 | 8 | 0 | 3.142438  | -0.408845 | 0.406805  |
| 34 | 8 | 0 | 1.948194  | 2.463274  | -1.202324 |
| 35 | 7 | 0 | 4.565152  | -1.639358 | 1.677077  |
| 36 | 1 | 0 | 5.091408  | -1.726457 | 2.538580  |
| 37 | 7 | 0 | 3.135985  | 1.794724  | 2.304252  |
| 38 | 7 | 0 | -2.077344 | 3.893968  | -0.854261 |
| 39 | 1 | 0 | -2.201391 | 4.724400  | -1.422900 |
| 40 | 7 | 0 | 1.675474  | 3.793901  | -1.018999 |
| 41 | 6 | 0 | 4.528114  | -2.758754 | 0.813825  |
| 42 | 6 | 0 | 5.443268  | -2.848524 | -0.266393 |
| 43 | 6 | 0 | 5.370181  | -3.956927 | -1.130182 |
| 44 | 1 | 0 | 6.046657  | -4.049937 | -1.969398 |
| 45 | 6 | 0 | 4.416139  | -4.950922 | -0.934991 |
| 46 | 1 | 0 | 4.368031  | -5.792393 | -1.614169 |
| 47 | 6 | 0 | 3.514755  | -4.861181 | 0.121019  |
| 48 | 1 | 0 | 2.774948  | -5.642533 | 0.235138  |
| 49 | 6 | 0 | 3.556431  | -3.774250 | 1.013172  |
| 50 | 6 | 0 | 2.536004  | -3.690190 | 2.143951  |
| 51 | 1 | 0 | 2.730936  | -2.804522 | 2.782709  |
| 52 | 6 | 0 | 1.119100  | -3.520088 | 1.585370  |
| 53 | 1 | 0 | 1.090935  | -2.652917 | 0.892831  |
| 54 | 1 | 0 | 0.402589  | -3.327652 | 2.412663  |
| 55 | 1 | 0 | 0.789631  | -4.427380 | 1.036051  |
| 56 | 6 | 0 | 2.621202  | -4.908556 | 3.070859  |
| 57 | 1 | 0 | 1.953144  | -4.766931 | 3.947455  |
| 58 | 1 | 0 | 3.659570  | -5.031211 | 3.446572  |

|     |   |   |          |           |           |
|-----|---|---|----------|-----------|-----------|
| 59  | 1 | 0 | 2.315898 | -5.839912 | 2.549369  |
| 60  | 6 | 0 | 6.475175 | -1.756266 | -0.528419 |
| 61  | 1 | 0 | 6.426882 | -0.973880 | 0.257621  |
| 62  | 6 | 0 | 7.902660 | -2.314764 | -0.487755 |
| 63  | 1 | 0 | 8.080577 | -2.838610 | 0.475980  |
| 64  | 1 | 0 | 8.638423 | -1.485978 | -0.568770 |
| 65  | 1 | 0 | 8.086577 | -3.024936 | -1.321174 |
| 66  | 6 | 0 | 6.195913 | -1.050588 | -1.860551 |
| 67  | 1 | 0 | 6.304677 | -1.746875 | -2.718892 |
| 68  | 1 | 0 | 6.904102 | -0.206367 | -2.002303 |
| 69  | 1 | 0 | 5.164697 | -0.635774 | -1.863793 |
| 70  | 6 | 0 | 3.813071 | -0.543333 | 1.439658  |
| 71  | 6 | 0 | 3.905911 | 0.495543  | 2.559664  |
| 72  | 1 | 0 | 4.960732 | 0.773833  | 2.666051  |
| 73  | 6 | 0 | 3.363328 | 0.047256  | 3.917878  |
| 74  | 1 | 0 | 3.975683 | -0.740714 | 4.362906  |
| 75  | 1 | 0 | 2.343314 | -0.327422 | 3.797281  |
| 76  | 6 | 0 | 3.402472 | 1.347539  | 4.740976  |
| 77  | 1 | 0 | 4.383062 | 1.427819  | 5.219554  |
| 78  | 6 | 0 | 2.260069 | 1.522642  | 5.765018  |
| 79  | 1 | 0 | 1.922608 | 0.564176  | 6.175259  |
| 80  | 1 | 0 | 2.613164 | 2.130654  | 6.606695  |
| 81  | 6 | 0 | 1.161883 | 2.278652  | 4.998263  |
| 82  | 1 | 0 | 0.458791 | 2.792454  | 5.662689  |
| 83  | 1 | 0 | 0.592365 | 1.588058  | 4.368779  |
| 84  | 6 | 0 | 1.948707 | 3.251290  | 4.102715  |
| 85  | 1 | 0 | 1.372910 | 3.603684  | 3.247398  |
| 86  | 1 | 0 | 2.261644 | 4.126596  | 4.686017  |
| 87  | 6 | 0 | 3.223796 | 2.494465  | 3.701791  |
| 88  | 1 | 0 | 4.099412 | 3.141823  | 3.644378  |
| 89  | 6 | 0 | 3.830628 | 2.606675  | 1.221209  |
| 90  | 1 | 0 | 4.878483 | 2.685252  | 1.526284  |
| 91  | 1 | 0 | 3.762873 | 2.012388  | 0.313324  |
| 92  | 6 | 0 | 3.287538 | 4.019075  | 0.985094  |
| 93  | 1 | 0 | 4.013440 | 4.511887  | 0.328118  |
| 94  | 1 | 0 | 3.318428 | 4.587005  | 1.921926  |
| 95  | 6 | 0 | 1.875004 | 4.206168  | 0.426944  |
| 96  | 1 | 0 | 1.160003 | 3.618277  | 0.998711  |
| 97  | 1 | 0 | 1.606669 | 5.265278  | 0.484727  |
| 98  | 6 | 0 | 2.514666 | 4.646894  | -2.022303 |
| 99  | 1 | 0 | 2.674024 | 5.605942  | -1.526221 |
| 100 | 6 | 0 | 3.822268 | 3.973515  | -2.464336 |
| 101 | 1 | 0 | 4.232703 | 3.300113  | -1.711413 |
| 102 | 1 | 0 | 4.552834 | 4.773964  | -2.639173 |

|     |   |   |           |          |           |
|-----|---|---|-----------|----------|-----------|
| 103 | 6 | 0 | 3.490321  | 3.264193 | -3.789218 |
| 104 | 1 | 0 | 3.032039  | 2.293707 | -3.579182 |
| 105 | 1 | 0 | 4.379112  | 3.094785 | -4.407053 |
| 106 | 6 | 0 | 2.473526  | 4.203017 | -4.461785 |
| 107 | 1 | 0 | 1.854183  | 3.698321 | -5.211516 |
| 108 | 1 | 0 | 2.997173  | 5.022864 | -4.968995 |
| 109 | 6 | 0 | 1.628284  | 4.772960 | -3.300894 |
| 110 | 1 | 0 | 1.375564  | 5.823747 | -3.472309 |
| 111 | 6 | 0 | 0.329486  | 4.004792 | -2.977293 |
| 112 | 1 | 0 | 0.397309  | 2.948670 | -3.251222 |
| 113 | 1 | 0 | -0.544511 | 4.440959 | -3.466829 |
| 114 | 6 | 0 | 0.245923  | 4.137838 | -1.456619 |
| 115 | 1 | 0 | 0.096942  | 5.191461 | -1.196060 |
| 116 | 6 | 0 | -0.852027 | 3.324054 | -0.773577 |
| 117 | 6 | 0 | -3.232484 | 3.160244 | -0.489641 |
| 118 | 6 | 0 | -3.592204 | 3.037715 | 0.880286  |
| 119 | 6 | 0 | -4.711358 | 2.257920 | 1.223685  |
| 120 | 1 | 0 | -5.006838 | 2.138038 | 2.257624  |
| 121 | 6 | 0 | -5.466023 | 1.624195 | 0.243202  |
| 122 | 1 | 0 | -6.326977 | 1.032839 | 0.525986  |
| 123 | 6 | 0 | -5.117159 | 1.743125 | -1.097918 |
| 124 | 1 | 0 | -5.717970 | 1.224870 | -1.833315 |
| 125 | 6 | 0 | -4.003070 | 2.507797 | -1.489309 |
| 126 | 6 | 0 | -3.629951 | 2.583035 | -2.967544 |
| 127 | 1 | 0 | -2.760574 | 3.252482 | -3.121425 |
| 128 | 6 | 0 | -4.773308 | 3.172125 | -3.802841 |
| 129 | 1 | 0 | -4.436496 | 3.333176 | -4.849379 |
| 130 | 1 | 0 | -5.083149 | 4.155036 | -3.387228 |
| 131 | 1 | 0 | -5.654350 | 2.496832 | -3.822762 |
| 132 | 6 | 0 | -3.210077 | 1.208116 | -3.500395 |
| 133 | 1 | 0 | -2.349078 | 0.819806 | -2.915660 |
| 134 | 1 | 0 | -2.887979 | 1.290788 | -4.560546 |
| 135 | 1 | 0 | -4.045229 | 0.478296 | -3.443951 |
| 136 | 6 | 0 | -2.801841 | 3.737650 | 1.982483  |
| 137 | 1 | 0 | -1.971783 | 4.335294 | 1.551718  |
| 138 | 6 | 0 | -3.682855 | 4.728968 | 2.752416  |
| 139 | 1 | 0 | -4.154232 | 5.448041 | 2.048663  |
| 140 | 1 | 0 | -3.065418 | 5.308175 | 3.472228  |
| 141 | 1 | 0 | -4.481794 | 4.208010 | 3.321332  |
| 142 | 6 | 0 | -2.161930 | 2.720844 | 2.935556  |
| 143 | 1 | 0 | -2.934058 | 2.141071 | 3.482873  |
| 144 | 1 | 0 | -1.526281 | 3.245366 | 3.680235  |
| 145 | 1 | 0 | -1.517191 | 2.017026 | 2.369403  |
| 146 | 8 | 0 | -0.664380 | 2.254674 | -0.182569 |



|     |    |   |           |           |           |
|-----|----|---|-----------|-----------|-----------|
| 147 | 20 | 0 | 1.034328  | 0.614164  | -0.078057 |
| 148 | 8  | 0 | 0.506776  | -0.448069 | -2.126604 |
| 149 | 16 | 0 | 0.913899  | -1.156906 | -3.384406 |
| 150 | 8  | 0 | -0.229521 | -1.648967 | -4.173475 |
| 151 | 8  | 0 | 1.998166  | -0.492499 | -4.128504 |
| 152 | 6  | 0 | 1.705688  | -2.689505 | -2.693413 |
| 153 | 9  | 0 | 0.831533  | -3.389874 | -1.947440 |
| 154 | 9  | 0 | 2.152019  | -3.485803 | -3.673604 |
| 155 | 9  | 0 | 2.743134  | -2.351948 | -1.911930 |
| 156 | 35 | 0 | -6.013822 | -2.013670 | -0.690618 |

---

### L3a-Ca(II)-IM1-re-1

Zero-point correction= 1.28751 a.u.

Thermal correction to Gibbs Free Energy= 1.17295 a.u.

Sum of electronic and zero-point Energies= -7194.61521 a.u.

Sum of electronic and thermal Free Energies= -7194.72978 a.u.

The number of imaginary frequencies        0

Standard orientation

---

| Center<br>Number | Atomic<br>Number | Atomic<br>Type | Coordinates (Angstroms) |           |           |
|------------------|------------------|----------------|-------------------------|-----------|-----------|
|                  |                  |                | X                       | Y         | Z         |
| 1                | 6                | 0              | 3.588330                | -0.075213 | -0.313972 |
| 2                | 6                | 0              | 4.623956                | 0.507188  | -0.941640 |
| 3                | 8                | 0              | 5.803546                | 0.617233  | -0.251016 |
| 4                | 6                | 0              | 7.016256                | 0.798896  | -0.980773 |
| 5                | 6                | 0              | 4.532143                | 1.102771  | -2.318545 |
| 6                | 1                | 0              | 2.625204                | -0.155499 | -0.800856 |
| 7                | 1                | 0              | 3.707937                | -0.495290 | 0.679857  |
| 8                | 1                | 0              | 7.810786                | 0.832991  | -0.231509 |
| 9                | 1                | 0              | 7.022958                | 1.736957  | -1.547388 |
| 10               | 1                | 0              | 7.208852                | -0.037909 | -1.663703 |
| 11               | 1                | 0              | 5.261158                | 0.660898  | -3.008173 |
| 12               | 1                | 0              | 4.720146                | 2.184208  | -2.292892 |
| 13               | 1                | 0              | 3.532571                | 0.945036  | -2.729899 |
| 14               | 6                | 0              | 1.795286                | 1.619198  | 1.579443  |
| 15               | 6                | 0              | 1.993000                | 2.631723  | 0.415412  |
| 16               | 6                | 0              | 3.144706                | 3.445461  | 0.826342  |
| 17               | 6                | 0              | 3.537761                | 2.993430  | 2.104076  |
| 18               | 7                | 0              | 2.716108                | 1.921354  | 2.528421  |
| 19               | 8                | 0              | 1.260274                | 2.692790  | -0.548113 |
| 20               | 8                | 0              | 0.938237                | 0.737026  | 1.633670  |
| 21               | 6                | 0              | 2.893420                | 1.198357  | 3.779212  |

|    |   |   |           |           |           |
|----|---|---|-----------|-----------|-----------|
| 22 | 6 | 0 | 3.842414  | 4.487411  | 0.224919  |
| 23 | 6 | 0 | 4.595552  | 3.566238  | 2.789772  |
| 24 | 1 | 0 | 3.834962  | 0.639743  | 3.766267  |
| 25 | 1 | 0 | 2.058274  | 0.506940  | 3.892981  |
| 26 | 1 | 0 | 2.898737  | 1.900401  | 4.617702  |
| 27 | 6 | 0 | 5.272210  | 4.622631  | 2.160632  |
| 28 | 6 | 0 | 4.913257  | 5.086244  | 0.893106  |
| 29 | 1 | 0 | 4.899379  | 3.217296  | 3.769942  |
| 30 | 1 | 0 | 6.106870  | 5.092321  | 2.672591  |
| 31 | 1 | 0 | 5.462544  | 5.897943  | 0.429982  |
| 32 | 8 | 0 | -1.581434 | -0.926166 | 2.405756  |
| 33 | 8 | 0 | -2.530292 | 1.045916  | 0.633001  |
| 34 | 8 | 0 | -1.992946 | -2.312759 | -0.467976 |
| 35 | 7 | 0 | -4.471432 | 2.037637  | 1.262993  |
| 36 | 1 | 0 | -5.249580 | 2.048408  | 1.912021  |
| 37 | 7 | 0 | -2.877806 | -0.918126 | 2.843070  |
| 38 | 7 | 0 | 1.782244  | -4.328545 | -0.183200 |
| 39 | 1 | 0 | 1.688552  | -5.213762 | -0.668643 |
| 40 | 7 | 0 | -1.908261 | -3.626290 | -0.083873 |
| 41 | 6 | 0 | -4.629151 | 2.705508  | 0.025655  |
| 42 | 6 | 0 | -5.480574 | 2.156267  | -0.969002 |
| 43 | 6 | 0 | -5.559665 | 2.790137  | -2.222341 |
| 44 | 1 | 0 | -6.186889 | 2.387973  | -3.006955 |
| 45 | 6 | 0 | -4.822265 | 3.939353  | -2.487875 |
| 46 | 1 | 0 | -4.890368 | 4.410156  | -3.460153 |
| 47 | 6 | 0 | -3.995298 | 4.484397  | -1.511000 |
| 48 | 1 | 0 | -3.432544 | 5.376627  | -1.751663 |
| 49 | 6 | 0 | -3.888196 | 3.886917  | -0.242150 |
| 50 | 6 | 0 | -2.974070 | 4.511118  | 0.808043  |
| 51 | 1 | 0 | -3.039428 | 3.953465  | 1.765394  |
| 52 | 6 | 0 | -1.508528 | 4.448176  | 0.364077  |
| 53 | 1 | 0 | -1.228361 | 3.397234  | 0.144419  |
| 54 | 1 | 0 | -0.845176 | 4.818030  | 1.175062  |
| 55 | 1 | 0 | -1.332005 | 5.062996  | -0.543825 |
| 56 | 6 | 0 | -3.390827 | 5.951660  | 1.128662  |
| 57 | 1 | 0 | -2.783897 | 6.344901  | 1.972406  |
| 58 | 1 | 0 | -4.459317 | 5.981459  | 1.431986  |
| 59 | 1 | 0 | -3.246197 | 6.622412  | 0.255880  |
| 60 | 6 | 0 | -6.272589 | 0.874966  | -0.724334 |
| 61 | 1 | 0 | -6.129841 | 0.515940  | 0.315623  |
| 62 | 6 | 0 | -7.778992 | 1.108127  | -0.893011 |
| 63 | 1 | 0 | -8.112591 | 1.942539  | -0.239784 |
| 64 | 1 | 0 | -8.341179 | 0.196422  | -0.597347 |
| 65 | 1 | 0 | -8.039125 | 1.350177  | -1.944974 |

|     |   |   |           |           |           |
|-----|---|---|-----------|-----------|-----------|
| 66  | 6 | 0 | -5.784732 | -0.253693 | -1.639395 |
| 67  | 1 | 0 | -5.958737 | -0.014085 | -2.709563 |
| 68  | 1 | 0 | -6.320272 | -1.197226 | -1.400274 |
| 69  | 1 | 0 | -4.698947 | -0.422895 | -1.482429 |
| 70  | 6 | 0 | -3.435835 | 1.191160  | 1.463304  |
| 71  | 6 | 0 | -3.470921 | 0.500039  | 2.824035  |
| 72  | 1 | 0 | -4.515550 | 0.386501  | 3.130272  |
| 73  | 6 | 0 | -2.696025 | 1.188685  | 3.943518  |
| 74  | 1 | 0 | -3.145903 | 2.148674  | 4.208502  |
| 75  | 1 | 0 | -1.663912 | 1.354867  | 3.624922  |
| 76  | 6 | 0 | -2.790339 | 0.150023  | 5.082220  |
| 77  | 1 | 0 | -3.693457 | 0.356611  | 5.664066  |
| 78  | 6 | 0 | -1.549309 | 0.037653  | 5.995952  |
| 79  | 1 | 0 | -1.007310 | 0.987017  | 6.071892  |
| 80  | 1 | 0 | -1.864996 | -0.238346 | 7.009500  |
| 81  | 6 | 0 | -0.705875 | -1.094205 | 5.383181  |
| 82  | 1 | 0 | -0.015403 | -1.544470 | 6.104818  |
| 83  | 1 | 0 | -0.122915 | -0.720467 | 4.536290  |
| 84  | 6 | 0 | -1.755556 | -2.093475 | 4.867395  |
| 85  | 1 | 0 | -1.364598 | -2.768351 | 4.106006  |
| 86  | 1 | 0 | -2.132466 | -2.702930 | 5.698934  |
| 87  | 6 | 0 | -2.927307 | -1.234268 | 4.371434  |
| 88  | 1 | 0 | -3.899961 | -1.700219 | 4.539759  |
| 89  | 6 | 0 | -3.750032 | -1.836625 | 2.008063  |
| 90  | 1 | 0 | -4.771318 | -1.723183 | 2.384196  |
| 91  | 1 | 0 | -3.689828 | -1.448393 | 0.992734  |
| 92  | 6 | 0 | -3.380260 | -3.321420 | 2.025707  |
| 93  | 1 | 0 | -4.212075 | -3.841785 | 1.537575  |
| 94  | 1 | 0 | -3.379758 | -3.687819 | 3.058881  |
| 95  | 6 | 0 | -2.052669 | -3.782267 | 1.419669  |
| 96  | 1 | 0 | -1.225034 | -3.222885 | 1.849697  |
| 97  | 1 | 0 | -1.924101 | -4.847942 | 1.631549  |
| 98  | 6 | 0 | -2.939055 | -4.483101 | -0.885283 |
| 99  | 1 | 0 | -3.189260 | -5.320845 | -0.232177 |
| 100 | 6 | 0 | -4.170939 | -3.695407 | -1.350228 |
| 101 | 1 | 0 | -4.429548 | -2.876527 | -0.679539 |
| 102 | 1 | 0 | -5.015102 | -4.397376 | -1.365804 |
| 103 | 6 | 0 | -3.844461 | -3.233078 | -2.781462 |
| 104 | 1 | 0 | -3.234282 | -2.326842 | -2.743246 |
| 105 | 1 | 0 | -4.744654 | -3.015148 | -3.367047 |
| 106 | 6 | 0 | -3.029081 | -4.401771 | -3.362604 |
| 107 | 1 | 0 | -2.400586 | -4.104864 | -4.208813 |
| 108 | 1 | 0 | -3.704162 | -5.190834 | -3.716776 |
| 109 | 6 | 0 | -2.191136 | -4.934131 | -2.177326 |

|     |    |   |           |           |           |
|-----|----|---|-----------|-----------|-----------|
| 110 | 1  | 0 | -2.123912 | -6.026050 | -2.199866 |
| 111 | 6  | 0 | -0.765933 | -4.355713 | -2.051533 |
| 112 | 1  | 0 | -0.681744 | -3.366245 | -2.507686 |
| 113 | 1  | 0 | -0.015448 | -5.012798 | -2.498142 |
| 114 | 6  | 0 | -0.586967 | -4.254809 | -0.535626 |
| 115 | 1  | 0 | -0.577788 | -5.263927 | -0.109375 |
| 116 | 6  | 0 | 0.682974  | -3.545337 | -0.059506 |
| 117 | 6  | 0 | 3.088969  | -3.802507 | -0.032114 |
| 118 | 6  | 0 | 3.621301  | -3.577151 | 1.267424  |
| 119 | 6  | 0 | 4.933122  | -3.082903 | 1.389913  |
| 120 | 1  | 0 | 5.362393  | -2.889116 | 2.363836  |
| 121 | 6  | 0 | 5.712255  | -2.838956 | 0.264155  |
| 122 | 1  | 0 | 6.720241  | -2.460289 | 0.377430  |
| 123 | 6  | 0 | 5.198033  | -3.066921 | -1.007199 |
| 124 | 1  | 0 | 5.828595  | -2.859200 | -1.861418 |
| 125 | 6  | 0 | 3.882859  | -3.535524 | -1.181047 |
| 126 | 6  | 0 | 3.339021  | -3.720793 | -2.594884 |
| 127 | 1  | 0 | 2.279561  | -4.042708 | -2.570282 |
| 128 | 6  | 0 | 4.110317  | -4.814442 | -3.341332 |
| 129 | 1  | 0 | 3.645314  | -5.000459 | -4.333271 |
| 130 | 1  | 0 | 4.079797  | -5.763378 | -2.764031 |
| 131 | 1  | 0 | 5.170837  | -4.525774 | -3.499999 |
| 132 | 6  | 0 | 3.356823  | -2.402276 | -3.378261 |
| 133 | 1  | 0 | 2.807938  | -1.620277 | -2.815159 |
| 134 | 1  | 0 | 2.852311  | -2.533763 | -4.359350 |
| 135 | 1  | 0 | 4.393485  | -2.051516 | -3.565060 |
| 136 | 6  | 0 | 2.814004  | -3.867820 | 2.530280  |
| 137 | 1  | 0 | 1.821267  | -4.290892 | 2.274554  |
| 138 | 6  | 0 | 3.506148  | -4.920222 | 3.405123  |
| 139 | 1  | 0 | 3.701222  | -5.840737 | 2.814116  |
| 140 | 1  | 0 | 2.851576  | -5.195169 | 4.259858  |
| 141 | 1  | 0 | 4.468425  | -4.544580 | 3.812471  |
| 142 | 6  | 0 | 2.552353  | -2.581821 | 3.324371  |
| 143 | 1  | 0 | 3.495902  | -2.153980 | 3.723786  |
| 144 | 1  | 0 | 1.874145  | -2.792336 | 4.178677  |
| 145 | 1  | 0 | 2.063427  | -1.824593 | 2.676820  |
| 146 | 8  | 0 | 0.722616  | -2.405454 | 0.416755  |
| 147 | 20 | 0 | -0.687894 | -0.480917 | 0.248061  |
| 148 | 8  | 0 | 0.394399  | -0.327989 | -1.899172 |
| 149 | 16 | 0 | 0.108032  | -0.098368 | -3.354411 |
| 150 | 8  | 0 | 1.126735  | 0.712677  | -4.042533 |
| 151 | 8  | 0 | -0.362358 | -1.302513 | -4.066041 |
| 152 | 6  | 0 | -1.393802 | 1.000243  | -3.276523 |
| 153 | 9  | 0 | -1.128346 | 2.133489  | -2.611771 |

|     |    |   |           |          |           |
|-----|----|---|-----------|----------|-----------|
| 154 | 9  | 0 | -1.825142 | 1.316464 | -4.504420 |
| 155 | 9  | 0 | -2.395087 | 0.366703 | -2.629108 |
| 156 | 35 | 0 | 3.367945  | 5.084051 | -1.516070 |

**L3a-Ca(II)-TS-re-1**

Zero-point correction= 1.28559 a.u.

Thermal correction to Gibbs Free Energy= 1.17449 a.u.

Sum of electronic and zero-point Energies= -7194.59210 a.u.

Sum of electronic and thermal Free Energies= -7194.70320 a.u.

The number of imaginary frequencies 1

Standard orientation

| Center<br>Number | Atomic<br>Number | Atomic<br>Type | Coordinates (Angstroms) |           |           |
|------------------|------------------|----------------|-------------------------|-----------|-----------|
|                  |                  |                | X                       | Y         | Z         |
| 1                | 6                | 0              | -3.608770               | -0.347138 | -0.565505 |
| 2                | 6                | 0              | -3.996808               | -0.808363 | -1.889909 |
| 3                | 8                | 0              | -5.286124               | -0.755784 | -2.154831 |
| 4                | 6                | 0              | -5.780142               | -1.212772 | -3.433887 |
| 5                | 6                | 0              | -3.011838               | -1.505792 | -2.639266 |
| 6                | 1                | 0              | -2.690219               | 0.240650  | -0.616259 |
| 7                | 1                | 0              | -4.398191               | 0.194644  | -0.044493 |
| 8                | 1                | 0              | -6.817652               | -0.880858 | -3.472202 |
| 9                | 1                | 0              | -5.735901               | -2.302084 | -3.485507 |
| 10               | 1                | 0              | -5.205500               | -0.762246 | -4.246744 |
| 11               | 1                | 0              | -2.058896               | -0.985205 | -2.749291 |
| 12               | 1                | 0              | -3.321312               | -2.004038 | -3.555520 |
| 13               | 1                | 0              | -2.667198               | -2.258632 | -1.710756 |
| 14               | 6                | 0              | -2.466990               | -0.965015 | 1.543177  |
| 15               | 6                | 0              | -3.143428               | -1.697869 | 0.344617  |
| 16               | 6                | 0              | -4.382471               | -2.288986 | 1.028831  |
| 17               | 6                | 0              | -4.422981               | -1.829214 | 2.354741  |
| 18               | 7                | 0              | -3.287998               | -1.031721 | 2.623519  |
| 19               | 8                | 0              | -2.344360               | -2.524789 | -0.315913 |
| 20               | 8                | 0              | -1.375249               | -0.388706 | 1.514061  |
| 21               | 6                | 0              | -2.988104               | -0.480302 | 3.934437  |
| 22               | 6                | 0              | -5.357743               | -3.184303 | 0.627407  |
| 23               | 6                | 0              | -5.427481               | -2.176040 | 3.248951  |
| 24               | 1                | 0              | -3.800117               | 0.175058  | 4.262654  |
| 25               | 1                | 0              | -2.062981               | 0.089129  | 3.861366  |
| 26               | 1                | 0              | -2.860054               | -1.285406 | 4.665825  |
| 27               | 6                | 0              | -6.423987               | -3.046752 | 2.789498  |
| 28               | 6                | 0              | -6.390198               | -3.564369 | 1.495269  |

|    |   |   |           |           |           |
|----|---|---|-----------|-----------|-----------|
| 29 | 1 | 0 | -5.438084 | -1.802084 | 4.267084  |
| 30 | 1 | 0 | -7.227268 | -3.342104 | 3.458246  |
| 31 | 1 | 0 | -7.150318 | -4.262781 | 1.162689  |
| 32 | 8 | 0 | 1.489204  | 0.519031  | 2.648895  |
| 33 | 8 | 0 | 2.575131  | -1.132862 | 0.615381  |
| 34 | 8 | 0 | 2.203832  | 2.077601  | -0.138541 |
| 35 | 7 | 0 | 4.220114  | -2.526370 | 1.324401  |
| 36 | 1 | 0 | 4.900185  | -2.738593 | 2.045316  |
| 37 | 7 | 0 | 2.776741  | 0.428010  | 3.112033  |
| 38 | 7 | 0 | -1.407099 | 4.315593  | -0.410478 |
| 39 | 1 | 0 | -1.201709 | 5.194942  | -0.871677 |
| 40 | 7 | 0 | 2.171474  | 3.378563  | 0.296132  |
| 41 | 6 | 0 | 4.434458  | -3.067197 | 0.035126  |
| 42 | 6 | 0 | 5.483217  | -2.560606 | -0.777385 |
| 43 | 6 | 0 | 5.633350  | -3.060750 | -2.083676 |
| 44 | 1 | 0 | 6.410028  | -2.682283 | -2.734938 |
| 45 | 6 | 0 | 4.781256  | -4.045862 | -2.572164 |
| 46 | 1 | 0 | 4.909513  | -4.417196 | -3.580818 |
| 47 | 6 | 0 | 3.760995  | -4.551712 | -1.772904 |
| 48 | 1 | 0 | 3.111566  | -5.311930 | -2.186111 |
| 49 | 6 | 0 | 3.567547  | -4.074964 | -0.463680 |
| 50 | 6 | 0 | 2.430688  | -4.640977 | 0.382456  |
| 51 | 1 | 0 | 2.440712  | -4.196472 | 1.399344  |
| 52 | 6 | 0 | 1.066430  | -4.300754 | -0.229698 |
| 53 | 1 | 0 | 0.966028  | -3.201727 | -0.355137 |
| 54 | 1 | 0 | 0.250723  | -4.643163 | 0.442565  |
| 55 | 1 | 0 | 0.932852  | -4.788424 | -1.218501 |
| 56 | 6 | 0 | 2.582066  | -6.154174 | 0.580309  |
| 57 | 1 | 0 | 1.814859  | -6.523616 | 1.294302  |
| 58 | 1 | 0 | 3.583150  | -6.386330 | 1.002729  |
| 59 | 1 | 0 | 2.459783  | -6.704691 | -0.376276 |
| 60 | 6 | 0 | 6.421581  | -1.464206 | -0.279835 |
| 61 | 1 | 0 | 6.205997  | -1.211639 | 0.778654  |
| 62 | 6 | 0 | 7.885410  | -1.919682 | -0.319875 |
| 63 | 1 | 0 | 8.004564  | -2.872165 | 0.239962  |
| 64 | 1 | 0 | 8.534607  | -1.156431 | 0.160401  |
| 65 | 1 | 0 | 8.238226  | -2.069162 | -1.361954 |
| 66 | 6 | 0 | 6.225447  | -0.169979 | -1.076815 |
| 67 | 1 | 0 | 6.478728  | -0.308842 | -2.149147 |
| 68 | 1 | 0 | 6.870076  | 0.635404  | -0.664380 |
| 69 | 1 | 0 | 5.169990  | 0.162553  | -0.996167 |
| 70 | 6 | 0 | 3.325903  | -1.530090 | 1.515591  |
| 71 | 6 | 0 | 3.331448  | -0.992079 | 2.946836  |
| 72 | 1 | 0 | 4.373500  | -0.940147 | 3.279381  |

|     |   |   |           |           |           |
|-----|---|---|-----------|-----------|-----------|
| 73  | 6 | 0 | 2.523068  | -1.780521 | 3.974573  |
| 74  | 1 | 0 | 2.946341  | -2.774067 | 4.140044  |
| 75  | 1 | 0 | 1.492392  | -1.888775 | 3.626286  |
| 76  | 6 | 0 | 2.622221  | -0.874339 | 5.221163  |
| 77  | 1 | 0 | 3.512584  | -1.163225 | 5.787417  |
| 78  | 6 | 0 | 1.372386  | -0.831654 | 6.128519  |
| 79  | 1 | 0 | 0.809875  | -1.771599 | 6.098819  |
| 80  | 1 | 0 | 1.680909  | -0.669344 | 7.168522  |
| 81  | 6 | 0 | 0.560670  | 0.375309  | 5.626376  |
| 82  | 1 | 0 | -0.134656 | 0.761522  | 6.379780  |
| 83  | 1 | 0 | -0.013026 | 0.099245  | 4.737992  |
| 84  | 6 | 0 | 1.633317  | 1.402278  | 5.227328  |
| 85  | 1 | 0 | 1.266295  | 2.150300  | 4.523654  |
| 86  | 1 | 0 | 2.005284  | 1.925092  | 6.117658  |
| 87  | 6 | 0 | 2.797721  | 0.574466  | 4.666596  |
| 88  | 1 | 0 | 3.774118  | 0.998039  | 4.905912  |
| 89  | 6 | 0 | 3.698805  | 1.407116  | 2.410017  |
| 90  | 1 | 0 | 4.696566  | 1.239658  | 2.827091  |
| 91  | 1 | 0 | 3.685389  | 1.117047  | 1.362024  |
| 92  | 6 | 0 | 3.347091  | 2.891018  | 2.545952  |
| 93  | 1 | 0 | 4.242918  | 3.437387  | 2.229738  |
| 94  | 1 | 0 | 3.211857  | 3.149721  | 3.601799  |
| 95  | 6 | 0 | 2.125380  | 3.452850  | 1.813374  |
| 96  | 1 | 0 | 1.221939  | 2.921017  | 2.104782  |
| 97  | 1 | 0 | 2.022351  | 4.511574  | 2.072203  |
| 98  | 6 | 0 | 3.368839  | 4.187284  | -0.307030 |
| 99  | 1 | 0 | 3.586724  | 4.965638  | 0.426176  |
| 100 | 6 | 0 | 4.595133  | 3.331628  | -0.653393 |
| 101 | 1 | 0 | 4.707183  | 2.457361  | -0.013301 |
| 102 | 1 | 0 | 5.478575  | 3.967498  | -0.508123 |
| 103 | 6 | 0 | 4.443199  | 2.980574  | -2.143495 |
| 104 | 1 | 0 | 3.770325  | 2.126339  | -2.253942 |
| 105 | 1 | 0 | 5.400284  | 2.724210  | -2.611720 |
| 106 | 6 | 0 | 3.807083  | 4.244130  | -2.748402 |
| 107 | 1 | 0 | 3.288201  | 4.051400  | -3.693499 |
| 108 | 1 | 0 | 4.580953  | 4.996180  | -2.946730 |
| 109 | 6 | 0 | 2.845828  | 4.767561  | -1.656662 |
| 110 | 1 | 0 | 2.851406  | 5.860889  | -1.613764 |
| 111 | 6 | 0 | 1.386091  | 4.285734  | -1.769356 |
| 112 | 1 | 0 | 1.311610  | 3.322848  | -2.281512 |
| 113 | 1 | 0 | 0.749934  | 5.010319  | -2.283839 |
| 114 | 6 | 0 | 0.979187  | 4.127785  | -0.303421 |
| 115 | 1 | 0 | 0.965428  | 5.112438  | 0.175214  |
| 116 | 6 | 0 | -0.389426 | 3.487601  | -0.076880 |

|     |    |   |           |           |           |
|-----|----|---|-----------|-----------|-----------|
| 117 | 6  | 0 | -2.748087 | 3.863050  | -0.416996 |
| 118 | 6  | 0 | -3.473956 | 3.780504  | 0.801453  |
| 119 | 6  | 0 | -4.789737 | 3.283717  | 0.777945  |
| 120 | 1  | 0 | -5.364265 | 3.196070  | 1.690588  |
| 121 | 6  | 0 | -5.384701 | 2.897345  | -0.418301 |
| 122 | 1  | 0 | -6.398215 | 2.517155  | -0.417710 |
| 123 | 6  | 0 | -4.680136 | 2.987777  | -1.614037 |
| 124 | 1  | 0 | -5.169493 | 2.668983  | -2.524926 |
| 125 | 6  | 0 | -3.358110 | 3.468368  | -1.637589 |
| 126 | 6  | 0 | -2.605086 | 3.520838  | -2.963414 |
| 127 | 1  | 0 | -1.582359 | 3.923480  | -2.819915 |
| 128 | 6  | 0 | -3.299304 | 4.454688  | -3.961357 |
| 129 | 1  | 0 | -2.681646 | 4.558375  | -4.879290 |
| 130 | 1  | 0 | -3.423523 | 5.464746  | -3.515382 |
| 131 | 1  | 0 | -4.297534 | 4.067009  | -4.255205 |
| 132 | 6  | 0 | -2.431286 | 2.117094  | -3.551767 |
| 133 | 1  | 0 | -1.922055 | 1.465962  | -2.812418 |
| 134 | 1  | 0 | -1.802026 | 2.160141  | -4.466205 |
| 135 | 1  | 0 | -3.408430 | 1.663734  | -3.820933 |
| 136 | 6  | 0 | -2.863285 | 4.224047  | 2.127900  |
| 137 | 1  | 0 | -1.842442 | 4.631361  | 1.974535  |
| 138 | 6  | 0 | -3.677612 | 5.355865  | 2.766260  |
| 139 | 1  | 0 | -3.785462 | 6.199133  | 2.050807  |
| 140 | 1  | 0 | -3.156254 | 5.737458  | 3.670304  |
| 141 | 1  | 0 | -4.688607 | 5.010457  | 3.068748  |
| 142 | 6  | 0 | -2.721861 | 3.039762  | 3.089980  |
| 143 | 1  | 0 | -3.714603 | 2.637768  | 3.382587  |
| 144 | 1  | 0 | -2.184513 | 3.354346  | 4.010194  |
| 145 | 1  | 0 | -2.132703 | 2.231064  | 2.610117  |
| 146 | 8  | 0 | -0.577720 | 2.353767  | 0.382055  |
| 147 | 20 | 0 | 0.693080  | 0.322349  | 0.428645  |
| 148 | 8  | 0 | 0.373863  | -0.015031 | -1.905961 |
| 149 | 16 | 0 | 0.767499  | -0.000636 | -3.352721 |
| 150 | 8  | 0 | -0.190332 | -0.702870 | -4.225780 |
| 151 | 8  | 0 | 1.255674  | 1.305209  | -3.833939 |
| 152 | 6  | 0 | 2.269383  | -1.093639 | -3.348846 |
| 153 | 9  | 0 | 1.947494  | -2.321680 | -2.917515 |
| 154 | 9  | 0 | 2.785291  | -1.199614 | -4.581707 |
| 155 | 9  | 0 | 3.214810  | -0.593400 | -2.536459 |
| 156 | 35 | 0 | -5.298321 | -3.992784 | -1.110142 |

---

**L3a-Ca(II)-IM2-re-1**

Zero-point correction= 1.29130 a.u.



Thermal correction to Gibbs Free Energy= 1.17629 a.u.

Sum of electronic and zero-point Energies= -7194.62803 a.u.

Sum of electronic and thermal Free Energies= -7194.74304 a.u.

The number of imaginary frequencies 0

Standard orientation

---

| Center<br>Number | Atomic<br>Number | Atomic<br>Type | Coordinates (Angstroms) |           |           |
|------------------|------------------|----------------|-------------------------|-----------|-----------|
|                  |                  |                | X                       | Y         | Z         |
| 1                | 6                | 0              | -3.366500               | -0.376470 | -0.419068 |
| 2                | 6                | 0              | -4.309809               | -0.352435 | -1.590448 |
| 3                | 8                | 0              | -5.600906               | -0.263189 | -1.167231 |
| 4                | 6                | 0              | -6.617111               | -0.167213 | -2.160680 |
| 5                | 6                | 0              | -3.895789               | -0.422716 | -2.866915 |
| 6                | 1                | 0              | -2.421963               | 0.089004  | -0.711308 |
| 7                | 1                | 0              | -3.799094               | 0.198991  | 0.405117  |
| 8                | 1                | 0              | -7.555281               | -0.029676 | -1.619182 |
| 9                | 1                | 0              | -6.671242               | -1.084129 | -2.757621 |
| 10               | 1                | 0              | -6.443500               | 0.690944  | -2.821345 |
| 11               | 1                | 0              | -2.835377               | -0.442490 | -3.094572 |
| 12               | 1                | 0              | -4.580453               | -0.433479 | -3.707427 |
| 13               | 1                | 0              | -2.761595               | -2.386690 | -1.719878 |
| 14               | 6                | 0              | -2.019707               | -1.517152 | 1.285486  |
| 15               | 6                | 0              | -2.992443               | -1.801220 | 0.111981  |
| 16               | 6                | 0              | -4.123421               | -2.525663 | 0.835128  |
| 17               | 6                | 0              | -3.885794               | -2.448496 | 2.216516  |
| 18               | 7                | 0              | -2.641173               | -1.820567 | 2.450705  |
| 19               | 8                | 0              | -2.332584               | -2.572367 | -0.862432 |
| 20               | 8                | 0              | -0.891971               | -1.024043 | 1.186104  |
| 21               | 6                | 0              | -2.053931               | -1.639661 | 3.767853  |
| 22               | 6                | 0              | -5.232084               | -3.238088 | 0.408094  |
| 23               | 6                | 0              | -4.749709               | -2.973818 | 3.167439  |
| 24               | 1                | 0              | -2.717884               | -1.041355 | 4.398675  |
| 25               | 1                | 0              | -1.103549               | -1.123164 | 3.642681  |
| 26               | 1                | 0              | -1.882930               | -2.611133 | 4.243496  |
| 27               | 6                | 0              | -5.891928               | -3.634629 | 2.698697  |
| 28               | 6                | 0              | -6.128941               | -3.787633 | 1.333275  |
| 29               | 1                | 0              | -4.545864               | -2.891979 | 4.229425  |
| 30               | 1                | 0              | -6.594531               | -4.059347 | 3.409575  |
| 31               | 1                | 0              | -6.995860               | -4.337937 | 0.984705  |
| 32               | 8                | 0              | 1.714011                | 0.523868  | 2.497223  |
| 33               | 8                | 0              | 2.658358                | -1.194559 | 0.478186  |
| 34               | 8                | 0              | 2.259918                | 2.150344  | -0.249330 |
| 35               | 7                | 0              | 4.354957                | -2.560952 | 1.089030  |

---

|    |   |   |           |           |           |
|----|---|---|-----------|-----------|-----------|
| 36 | 1 | 0 | 5.088862  | -2.760804 | 1.759508  |
| 37 | 7 | 0 | 3.014493  | 0.408877  | 2.919874  |
| 38 | 7 | 0 | -1.425594 | 4.302979  | 0.207903  |
| 39 | 1 | 0 | -1.295464 | 5.258637  | -0.104870 |
| 40 | 7 | 0 | 2.227273  | 3.427263  | 0.246948  |
| 41 | 6 | 0 | 4.477038  | -3.095794 | -0.215273 |
| 42 | 6 | 0 | 5.429963  | -2.548649 | -1.114454 |
| 43 | 6 | 0 | 5.467880  | -3.024601 | -2.437671 |
| 44 | 1 | 0 | 6.166670  | -2.612937 | -3.153788 |
| 45 | 6 | 0 | 4.595865  | -4.022006 | -2.861886 |
| 46 | 1 | 0 | 4.635906  | -4.372831 | -3.885029 |
| 47 | 6 | 0 | 3.662169  | -4.559637 | -1.981722 |
| 48 | 1 | 0 | 2.988288  | -5.322476 | -2.348488 |
| 49 | 6 | 0 | 3.582329  | -4.108570 | -0.651706 |
| 50 | 6 | 0 | 2.522383  | -4.693108 | 0.277964  |
| 51 | 1 | 0 | 2.617914  | -4.265791 | 1.297874  |
| 52 | 6 | 0 | 1.109652  | -4.347293 | -0.211330 |
| 53 | 1 | 0 | 0.999438  | -3.247701 | -0.321603 |
| 54 | 1 | 0 | 0.354202  | -4.693551 | 0.526311  |
| 55 | 1 | 0 | 0.891046  | -4.827658 | -1.188483 |
| 56 | 6 | 0 | 2.692907  | -6.208908 | 0.436183  |
| 57 | 1 | 0 | 1.987868  | -6.593637 | 1.203937  |
| 58 | 1 | 0 | 3.725903  | -6.445000 | 0.770482  |
| 59 | 1 | 0 | 2.493341  | -6.743532 | -0.516326 |
| 60 | 6 | 0 | 6.364586  | -1.416696 | -0.695393 |
| 61 | 1 | 0 | 6.259884  | -1.200222 | 0.387722  |
| 62 | 6 | 0 | 7.836270  | -1.790766 | -0.913084 |
| 63 | 1 | 0 | 8.066974  | -2.751174 | -0.404479 |
| 64 | 1 | 0 | 8.495466  | -1.007616 | -0.480910 |
| 65 | 1 | 0 | 8.078166  | -1.888597 | -1.992206 |
| 66 | 6 | 0 | 6.011212  | -0.118199 | -1.429340 |
| 67 | 1 | 0 | 6.138415  | -0.224612 | -2.527503 |
| 68 | 1 | 0 | 6.662516  | 0.710512  | -1.078129 |
| 69 | 1 | 0 | 4.958339  | 0.159932  | -1.214613 |
| 70 | 6 | 0 | 3.464238  | -1.576496 | 1.336394  |
| 71 | 6 | 0 | 3.528771  | -1.029064 | 2.759714  |
| 72 | 1 | 0 | 4.578905  | -1.007888 | 3.067768  |
| 73 | 6 | 0 | 2.721965  | -1.781387 | 3.816376  |
| 74 | 1 | 0 | 3.124944  | -2.782795 | 3.986496  |
| 75 | 1 | 0 | 1.682039  | -1.868127 | 3.492391  |
| 76 | 6 | 0 | 2.873046  | -0.860145 | 5.047234  |
| 77 | 1 | 0 | 3.762770  | -1.171630 | 5.602143  |
| 78 | 6 | 0 | 1.645133  | -0.757360 | 5.980696  |
| 79 | 1 | 0 | 1.033811  | -1.666598 | 5.958491  |

|     |   |   |           |           |           |
|-----|---|---|-----------|-----------|-----------|
| 80  | 1 | 0 | 1.984257  | -0.620582 | 7.014645  |
| 81  | 6 | 0 | 0.882943  | 0.494507  | 5.510050  |
| 82  | 1 | 0 | 0.245161  | 0.918877  | 6.293125  |
| 83  | 1 | 0 | 0.253712  | 0.257008  | 4.648818  |
| 84  | 6 | 0 | 1.991921  | 1.461526  | 5.063098  |
| 85  | 1 | 0 | 1.634592  | 2.224293  | 4.370487  |
| 86  | 1 | 0 | 2.422406  | 1.970446  | 5.934856  |
| 87  | 6 | 0 | 3.093858  | 0.573589  | 4.468949  |
| 88  | 1 | 0 | 4.097664  | 0.953282  | 4.667046  |
| 89  | 6 | 0 | 3.933824  | 1.361964  | 2.176401  |
| 90  | 1 | 0 | 4.945599  | 1.164787  | 2.544809  |
| 91  | 1 | 0 | 3.863758  | 1.077613  | 1.128778  |
| 92  | 6 | 0 | 3.634557  | 2.853952  | 2.340632  |
| 93  | 1 | 0 | 4.498894  | 3.380571  | 1.920851  |
| 94  | 1 | 0 | 3.629796  | 3.114582  | 3.405056  |
| 95  | 6 | 0 | 2.343833  | 3.437912  | 1.760899  |
| 96  | 1 | 0 | 1.480085  | 2.884690  | 2.124350  |
| 97  | 1 | 0 | 2.263779  | 4.484659  | 2.069096  |
| 98  | 6 | 0 | 3.318315  | 4.294148  | -0.456732 |
| 99  | 1 | 0 | 3.586448  | 5.066227  | 0.266587  |
| 100 | 6 | 0 | 4.526903  | 3.488571  | -0.953506 |
| 101 | 1 | 0 | 4.740484  | 2.611993  | -0.342070 |
| 102 | 1 | 0 | 5.398542  | 4.154348  | -0.899901 |
| 103 | 6 | 0 | 4.216691  | 3.146440  | -2.421255 |
| 104 | 1 | 0 | 3.570000  | 2.266120  | -2.463246 |
| 105 | 1 | 0 | 5.122075  | 2.933906  | -3.000863 |
| 106 | 6 | 0 | 3.465906  | 4.389318  | -2.932006 |
| 107 | 1 | 0 | 2.842770  | 4.181879  | -3.808329 |
| 108 | 1 | 0 | 4.182605  | 5.169399  | -3.217464 |
| 109 | 6 | 0 | 2.627082  | 4.876831  | -1.727353 |
| 110 | 1 | 0 | 2.617047  | 5.969550  | -1.670422 |
| 111 | 6 | 0 | 1.170607  | 4.368588  | -1.676488 |
| 112 | 1 | 0 | 1.046761  | 3.422101  | -2.209214 |
| 113 | 1 | 0 | 0.466596  | 5.097465  | -2.084147 |
| 114 | 6 | 0 | 0.946996  | 4.157593  | -0.177271 |
| 115 | 1 | 0 | 0.971499  | 5.126961  | 0.331591  |
| 116 | 6 | 0 | -0.363568 | 3.462911  | 0.195486  |
| 117 | 6 | 0 | -2.748724 | 3.796983  | 0.243336  |
| 118 | 6 | 0 | -3.311938 | 3.359727  | 1.473657  |
| 119 | 6 | 0 | -4.618977 | 2.839075  | 1.477810  |
| 120 | 1 | 0 | -5.074502 | 2.494775  | 2.396763  |
| 121 | 6 | 0 | -5.355684 | 2.750355  | 0.301782  |
| 122 | 1 | 0 | -6.358213 | 2.342640  | 0.323278  |
| 123 | 6 | 0 | -4.805350 | 3.170074  | -0.903981 |

|     |    |   |           |           |           |
|-----|----|---|-----------|-----------|-----------|
| 124 | 1  | 0 | -5.400150 | 3.071173  | -1.802245 |
| 125 | 6  | 0 | -3.502708 | 3.698630  | -0.958004 |
| 126 | 6  | 0 | -2.919757 | 4.106845  | -2.307741 |
| 127 | 1  | 0 | -1.900665 | 4.522026  | -2.188040 |
| 128 | 6  | 0 | -3.756009 | 5.209114  | -2.968815 |
| 129 | 1  | 0 | -3.248198 | 5.573090  | -3.887767 |
| 130 | 1  | 0 | -3.868830 | 6.070443  | -2.276008 |
| 131 | 1  | 0 | -4.764881 | 4.841788  | -3.251619 |
| 132 | 6  | 0 | -2.775836 | 2.893986  | -3.233093 |
| 133 | 1  | 0 | -2.165614 | 2.110183  | -2.735984 |
| 134 | 1  | 0 | -2.256506 | 3.187215  | -4.170410 |
| 135 | 1  | 0 | -3.766528 | 2.469786  | -3.500398 |
| 136 | 6  | 0 | -2.537972 | 3.442983  | 2.786714  |
| 137 | 1  | 0 | -1.537193 | 3.893438  | 2.625839  |
| 138 | 6  | 0 | -3.252384 | 4.350150  | 3.795567  |
| 139 | 1  | 0 | -3.429022 | 5.352372  | 3.349355  |
| 140 | 1  | 0 | -2.621643 | 4.484407  | 4.700562  |
| 141 | 1  | 0 | -4.226680 | 3.921233  | 4.111473  |
| 142 | 6  | 0 | -2.300526 | 2.046742  | 3.377431  |
| 143 | 1  | 0 | -3.256508 | 1.561569  | 3.666346  |
| 144 | 1  | 0 | -1.657864 | 2.119022  | 4.280561  |
| 145 | 1  | 0 | -1.783175 | 1.399697  | 2.638674  |
| 146 | 8  | 0 | -0.474241 | 2.261015  | 0.467163  |
| 147 | 20 | 0 | 0.867651  | 0.326226  | 0.270765  |
| 148 | 8  | 0 | -0.029050 | 0.041078  | -1.938354 |
| 149 | 16 | 0 | 0.312040  | 0.046974  | -3.400245 |
| 150 | 8  | 0 | -0.629642 | -0.728516 | -4.226626 |
| 151 | 8  | 0 | 0.712502  | 1.368502  | -3.918700 |
| 152 | 6  | 0 | 1.876041  | -0.961607 | -3.423924 |
| 153 | 9  | 0 | 1.642953  | -2.203977 | -2.976359 |
| 154 | 9  | 0 | 2.378417  | -1.041917 | -4.662708 |
| 155 | 9  | 0 | 2.806024  | -0.399760 | -2.626678 |
| 156 | 35 | 0 | -5.534805 | -3.576690 | -1.449799 |

---

**L1-Mg(II)-TS1-si-1**

Zero-point correction= 1.26094 a.u.

Thermal correction to Gibbs Free Energy= 1.15804 a.u.

Sum of electronic and zero-point Energies= -5755.24322 a.u.

Sum of electronic and thermal Free Energies= -5755.34612 a.u.

The number of imaginary frequencies 1

Standard orientation

---

| Center | Atomic | Atomic | Coordinates (Angstroms) |
|--------|--------|--------|-------------------------|
|--------|--------|--------|-------------------------|

| Number | Number | Type | X         | Y         | Z         |
|--------|--------|------|-----------|-----------|-----------|
| 1      | 6      | 0    | -0.733187 | 1.338027  | -1.832094 |
| 2      | 6      | 0    | -0.091299 | 2.137180  | -0.687005 |
| 3      | 6      | 0    | -0.943229 | 3.374407  | -0.660223 |
| 4      | 6      | 0    | -1.815512 | 3.326369  | -1.771071 |
| 5      | 7      | 0    | -1.629474 | 2.105332  | -2.489026 |
| 6      | 8      | 0    | 0.253688  | 1.433874  | 0.335664  |
| 7      | 6      | 0    | -1.050559 | 4.426275  | 0.233021  |
| 8      | 6      | 0    | -2.739595 | 4.335590  | -2.009476 |
| 9      | 8      | 0    | -0.475586 | 0.136997  | -2.004477 |
| 10     | 6      | 0    | -2.426372 | 1.568620  | -3.622289 |
| 11     | 1      | 0    | -1.937734 | 0.613980  | -3.832811 |
| 12     | 6      | 0    | -1.975352 | 5.453440  | 0.023709  |
| 13     | 6      | 0    | -2.798276 | 5.400499  | -1.099880 |
| 14     | 35     | 0    | 0.023568  | 4.457524  | 1.815684  |
| 15     | 1      | 0    | -2.056875 | 6.271529  | 0.730533  |
| 16     | 1      | 0    | -3.518740 | 6.195754  | -1.265476 |
| 17     | 1      | 0    | -3.419217 | 4.304949  | -2.851215 |
| 18     | 8      | 0    | 2.114121  | -0.842876 | -0.563173 |
| 19     | 12     | 0    | 0.140410  | -0.598604 | -0.038130 |
| 20     | 8      | 0    | -0.168763 | -2.564992 | -0.572970 |
| 21     | 8      | 0    | 0.664643  | -1.291255 | 1.817841  |
| 22     | 8      | 0    | -1.845153 | -0.652366 | 0.513922  |
| 23     | 7      | 0    | 4.092540  | -1.919561 | -0.307843 |
| 24     | 1      | 0    | 4.582709  | -2.789816 | -0.135899 |
| 25     | 7      | 0    | 0.651749  | -3.493591 | 0.005751  |
| 26     | 7      | 0    | -3.640415 | -1.716871 | 1.403307  |
| 27     | 1      | 0    | -3.984990 | -2.433279 | 2.031948  |
| 28     | 7      | 0    | -0.002991 | -2.398509 | 2.267542  |
| 29     | 6      | 0    | 4.869494  | -0.752537 | -0.512192 |
| 30     | 6      | 0    | 5.378448  | -0.039377 | 0.604297  |
| 31     | 6      | 0    | 6.109193  | 1.142500  | 0.383405  |
| 32     | 1      | 0    | 6.503543  | 1.712975  | 1.213748  |
| 33     | 6      | 0    | 6.328573  | 1.615636  | -0.905556 |
| 34     | 1      | 0    | 6.882111  | 2.533618  | -1.055652 |
| 35     | 6      | 0    | 5.841579  | 0.913751  | -2.002015 |
| 36     | 1      | 0    | 6.034888  | 1.306819  | -2.991241 |
| 37     | 6      | 0    | 5.128415  | -0.286428 | -1.831235 |
| 38     | 6      | 0    | 4.673189  | -1.063049 | -3.062307 |
| 39     | 1      | 0    | 4.208918  | -2.020250 | -2.763135 |
| 40     | 6      | 0    | 3.612341  | -0.286232 | -3.849438 |
| 41     | 1      | 0    | 2.728453  | -0.092535 | -3.208011 |
| 42     | 1      | 0    | 3.269952  | -0.882291 | -4.722401 |

|    |   |   |           |           |           |
|----|---|---|-----------|-----------|-----------|
| 43 | 1 | 0 | 4.009466  | 0.683011  | -4.218284 |
| 44 | 6 | 0 | 5.859151  | -1.437795 | -3.960985 |
| 45 | 1 | 0 | 5.522572  | -2.117209 | -4.773328 |
| 46 | 1 | 0 | 6.633973  | -1.971466 | -3.370054 |
| 47 | 1 | 0 | 6.317221  | -0.540890 | -4.428223 |
| 48 | 6 | 0 | 5.138195  | -0.513879 | 2.033160  |
| 49 | 1 | 0 | 4.571424  | -1.467656 | 2.039080  |
| 50 | 6 | 0 | 6.461800  | -0.798791 | 2.753694  |
| 51 | 1 | 0 | 7.070099  | -1.519591 | 2.166509  |
| 52 | 1 | 0 | 6.264208  | -1.250219 | 3.749670  |
| 53 | 1 | 0 | 7.051904  | 0.129772  | 2.904189  |
| 54 | 6 | 0 | 4.296318  | 0.501751  | 2.814532  |
| 55 | 1 | 0 | 4.800454  | 1.488962  | 2.876083  |
| 56 | 1 | 0 | 4.127212  | 0.139002  | 3.849394  |
| 57 | 1 | 0 | 3.308080  | 0.633722  | 2.325689  |
| 58 | 6 | 0 | 2.745504  | -1.895354 | -0.379269 |
| 59 | 6 | 0 | 2.134967  | -3.300979 | -0.395264 |
| 60 | 1 | 0 | 2.709180  | -3.959189 | 0.262299  |
| 61 | 6 | 0 | 2.156761  | -3.840191 | -1.833859 |
| 62 | 1 | 0 | 3.180472  | -4.023734 | -2.163196 |
| 63 | 1 | 0 | 1.700483  | -3.103956 | -2.502248 |
| 64 | 6 | 0 | 1.337330  | -5.135501 | -1.771620 |
| 65 | 1 | 0 | 2.012019  | -5.970689 | -1.565279 |
| 66 | 6 | 0 | 0.446930  | -5.418346 | -3.003205 |
| 67 | 1 | 0 | 0.874647  | -5.005576 | -3.923225 |
| 68 | 1 | 0 | 0.353708  | -6.501759 | -3.143457 |
| 69 | 6 | 0 | -0.922385 | -4.813547 | -2.646671 |
| 70 | 1 | 0 | -1.736810 | -5.259822 | -3.225859 |
| 71 | 1 | 0 | -0.923672 | -3.735078 | -2.831150 |
| 72 | 6 | 0 | -1.057183 | -5.076985 | -1.135058 |
| 73 | 1 | 0 | -1.764802 | -4.412226 | -0.637521 |
| 74 | 1 | 0 | -1.377768 | -6.110633 | -0.957819 |
| 75 | 6 | 0 | 0.365932  | -4.943006 | -0.586316 |
| 76 | 1 | 0 | 0.582502  | -5.626038 | 0.235713  |
| 77 | 6 | 0 | 0.383113  | -3.641883 | 1.491574  |
| 78 | 1 | 0 | 1.291113  | -4.036415 | 1.942715  |
| 79 | 1 | 0 | -0.432125 | -4.352858 | 1.602166  |
| 80 | 6 | 0 | 0.405191  | -2.729171 | 3.768537  |
| 81 | 1 | 0 | 0.320546  | -3.813854 | 3.847206  |
| 82 | 6 | 0 | 1.796434  | -2.198758 | 4.126404  |
| 83 | 1 | 0 | 2.454027  | -2.123531 | 3.258821  |
| 84 | 1 | 0 | 2.243395  | -2.909385 | 4.832078  |
| 85 | 6 | 0 | 1.537080  | -0.849133 | 4.822402  |
| 86 | 1 | 0 | 1.406373  | -0.068135 | 4.067179  |

|     |   |   |           |           |           |
|-----|---|---|-----------|-----------|-----------|
| 87  | 1 | 0 | 2.358676  | -0.552915 | 5.482159  |
| 88  | 6 | 0 | 0.223412  | -1.077246 | 5.589496  |
| 89  | 1 | 0 | -0.302184 | -0.146848 | 5.829955  |
| 90  | 1 | 0 | 0.426346  | -1.593218 | 6.535382  |
| 91  | 6 | 0 | -0.614420 | -1.996859 | 4.673350  |
| 92  | 1 | 0 | -1.185158 | -2.728006 | 5.252996  |
| 93  | 6 | 0 | -1.566681 | -1.282684 | 3.705356  |
| 94  | 1 | 0 | -1.221446 | -0.272902 | 3.464562  |
| 95  | 1 | 0 | -2.584862 | -1.220379 | 4.094961  |
| 96  | 6 | 0 | -1.523959 | -2.149433 | 2.438998  |
| 97  | 1 | 0 | -1.959698 | -3.130757 | 2.647197  |
| 98  | 6 | 0 | -2.315695 | -1.466618 | 1.318989  |
| 99  | 6 | 0 | -4.587938 | -1.043845 | 0.591840  |
| 100 | 6 | 0 | -5.186707 | -1.721635 | -0.502975 |
| 101 | 6 | 0 | -6.123123 | -1.038002 | -1.300734 |
| 102 | 1 | 0 | -6.594283 | -1.526173 | -2.143323 |
| 103 | 6 | 0 | -6.456010 | 0.285259  | -1.034742 |
| 104 | 1 | 0 | -7.168494 | 0.799678  | -1.666803 |
| 105 | 6 | 0 | -5.874821 | 0.951796  | 0.037726  |
| 106 | 1 | 0 | -6.157858 | 1.980562  | 0.217258  |
| 107 | 6 | 0 | -4.955758 | 0.300229  | 0.880629  |
| 108 | 6 | 0 | -4.401752 | 1.046155  | 2.090020  |
| 109 | 1 | 0 | -3.753493 | 0.382637  | 2.692848  |
| 110 | 6 | 0 | -5.524613 | 1.501132  | 3.030948  |
| 111 | 1 | 0 | -5.092326 | 1.926362  | 3.962211  |
| 112 | 1 | 0 | -6.161900 | 0.635570  | 3.313085  |
| 113 | 1 | 0 | -6.162845 | 2.278241  | 2.560172  |
| 114 | 6 | 0 | -3.535713 | 2.233002  | 1.656025  |
| 115 | 1 | 0 | -2.713201 | 1.878398  | 1.002328  |
| 116 | 1 | 0 | -3.081438 | 2.720473  | 2.544845  |
| 117 | 1 | 0 | -4.132050 | 2.990496  | 1.105075  |
| 118 | 6 | 0 | -4.826545 | -3.163061 | -0.845208 |
| 119 | 1 | 0 | -4.071938 | -3.558987 | -0.135284 |
| 120 | 6 | 0 | -6.048847 | -4.081356 | -0.730822 |
| 121 | 1 | 0 | -6.493287 | -3.999592 | 0.284264  |
| 122 | 1 | 0 | -5.747450 | -5.139046 | -0.889014 |
| 123 | 1 | 0 | -6.823615 | -3.823208 | -1.483387 |
| 124 | 6 | 0 | -4.199081 | -3.256416 | -2.240718 |
| 125 | 1 | 0 | -4.914280 | -2.946622 | -3.031348 |
| 126 | 1 | 0 | -3.891461 | -4.302402 | -2.448641 |
| 127 | 1 | 0 | -3.299847 | -2.606317 | -2.298267 |
| 128 | 6 | 0 | -2.308522 | 2.442395  | -4.873253 |
| 129 | 1 | 0 | -2.750276 | 1.906041  | -5.720017 |
| 130 | 1 | 0 | -2.832485 | 3.397908  | -4.777881 |

|     |   |   |           |          |           |
|-----|---|---|-----------|----------|-----------|
| 131 | 1 | 0 | -1.258511 | 2.644459 | -5.110841 |
| 132 | 6 | 0 | -3.865437 | 1.269764 | -3.193609 |
| 133 | 1 | 0 | -4.388043 | 0.754014 | -4.006346 |
| 134 | 1 | 0 | -3.862207 | 0.612832 | -2.318349 |
| 135 | 1 | 0 | -4.427747 | 2.176283 | -2.951014 |
| 136 | 6 | 0 | 1.448816  | 2.645163 | -1.711973 |
| 137 | 6 | 0 | 2.212742  | 3.526702 | -0.915125 |
| 138 | 8 | 0 | 2.055848  | 4.802994 | -1.152537 |
| 139 | 6 | 0 | 2.698062  | 5.819953 | -0.339894 |
| 140 | 1 | 0 | 2.514831  | 6.754659 | -0.867925 |
| 141 | 6 | 0 | 3.102484  | 3.037860 | 0.171293  |
| 142 | 1 | 0 | 2.225836  | 5.843474 | 0.644552  |
| 143 | 1 | 0 | 3.078280  | 1.949976 | 0.208501  |
| 144 | 1 | 0 | 1.880163  | 1.653712 | -1.810522 |
| 145 | 1 | 0 | 1.061116  | 3.076614 | -2.632313 |
| 146 | 1 | 0 | 4.129788  | 3.380132 | -0.003530 |
| 147 | 1 | 0 | 3.770390  | 5.631339 | -0.260869 |
| 148 | 1 | 0 | 2.786701  | 3.438643 | 1.140173  |

---

### L1-Mg(II)-TS1-re-1

Zero-point correction= 1.26146 a.u.

Thermal correction to Gibbs Free Energy= 1.15750 a.u.

Sum of electronic and zero-point Energies= -5755.23756 a.u.

Sum of electronic and thermal Free Energies= -5755.34151 a.u.

The number of imaginary frequencies 1

Standard orientation

---

| Center<br>Number | Atomic<br>Number | Atomic<br>Type | Coordinates (Angstroms) |          |           |
|------------------|------------------|----------------|-------------------------|----------|-----------|
|                  |                  |                | X                       | Y        | Z         |
| 1                | 6                | 0              | 0.018515                | 3.534710 | -0.100290 |
| 2                | 6                | 0              | 0.424580                | 4.094958 | 1.126017  |
| 3                | 8                | 0              | 1.277981                | 5.088304 | 1.049462  |
| 4                | 6                | 0              | 1.841140                | 5.714384 | 2.229899  |
| 5                | 6                | 0              | -0.023297               | 3.492476 | 2.406802  |
| 6                | 1                | 0              | -0.936279               | 3.016379 | -0.079217 |
| 7                | 1                | 0              | 0.205035                | 4.140576 | -0.982910 |
| 8                | 1                | 0              | 2.413042                | 6.559061 | 1.847617  |
| 9                | 1                | 0              | 2.503789                | 5.011504 | 2.738412  |
| 10               | 1                | 0              | 1.047708                | 6.065139 | 2.892891  |
| 11               | 1                | 0              | 0.152295                | 2.407643 | 2.319021  |
| 12               | 1                | 0              | -1.106310               | 3.628210 | 2.513049  |
| 13               | 1                | 0              | 0.476601                | 3.884594 | 3.291644  |



|    |    |   |           |           |           |
|----|----|---|-----------|-----------|-----------|
| 14 | 6  | 0 | 0.614329  | 1.597850  | -1.678508 |
| 15 | 6  | 0 | 1.153310  | 1.904665  | -0.278472 |
| 16 | 6  | 0 | 2.503198  | 2.469347  | -0.581180 |
| 17 | 6  | 0 | 2.576912  | 2.680466  | -1.977976 |
| 18 | 7  | 0 | 1.387338  | 2.203739  | -2.609019 |
| 19 | 8  | 0 | 0.833370  | 1.083189  | 0.651037  |
| 20 | 8  | 0 | -0.350348 | 0.838112  | -1.847225 |
| 21 | 6  | 0 | 0.966150  | 2.345242  | -4.028390 |
| 22 | 6  | 0 | 3.602902  | 2.759676  | 0.207623  |
| 23 | 6  | 0 | 3.718603  | 3.207397  | -2.567036 |
| 24 | 1  | 0 | -0.057175 | 1.960299  | -4.023959 |
| 25 | 6  | 0 | 4.809750  | 3.500798  | -1.735886 |
| 26 | 6  | 0 | 4.772089  | 3.273839  | -0.361030 |
| 27 | 1  | 0 | 3.790619  | 3.368295  | -3.635302 |
| 28 | 1  | 0 | 5.715895  | 3.902177  | -2.179785 |
| 29 | 1  | 0 | 5.636583  | 3.485059  | 0.258405  |
| 30 | 35 | 0 | 3.545887  | 2.419116  | 2.086475  |
| 31 | 8  | 0 | -1.520082 | -1.980339 | -0.885491 |
| 32 | 8  | 0 | 1.234508  | -1.390129 | -0.568508 |
| 33 | 12 | 0 | -0.481250 | -0.375617 | -0.048651 |
| 34 | 8  | 0 | -0.599464 | -1.419186 | 1.706765  |
| 35 | 7  | 0 | 2.549475  | -3.138474 | 0.025525  |
| 36 | 1  | 0 | 2.619654  | -4.125249 | 0.246203  |
| 37 | 7  | 0 | -1.200365 | -3.230785 | -0.418243 |
| 38 | 7  | 0 | -4.510212 | -0.236758 | 0.268815  |
| 39 | 1  | 0 | -5.200623 | -0.873267 | 0.652288  |
| 40 | 7  | 0 | -1.719576 | -2.190148 | 1.876767  |
| 41 | 6  | 0 | 3.718516  | -2.343100 | 0.148316  |
| 42 | 6  | 0 | 4.210236  | -1.997475 | 1.435047  |
| 43 | 6  | 0 | 5.339554  | -1.163030 | 1.534378  |
| 44 | 1  | 0 | 5.736159  | -0.879481 | 2.500238  |
| 45 | 6  | 0 | 5.966755  | -0.672323 | 0.395537  |
| 46 | 1  | 0 | 6.824491  | -0.018832 | 0.491224  |
| 47 | 6  | 0 | 5.506771  | -1.029897 | -0.865668 |
| 48 | 1  | 0 | 6.029111  | -0.644397 | -1.731285 |
| 49 | 6  | 0 | 4.401572  | -1.887928 | -1.013881 |
| 50 | 6  | 0 | 3.985847  | -2.325917 | -2.413011 |
| 51 | 1  | 0 | 3.148788  | -3.048451 | -2.361438 |
| 52 | 6  | 0 | 3.494788  | -1.134089 | -3.238884 |
| 53 | 1  | 0 | 2.661070  | -0.624872 | -2.712206 |
| 54 | 1  | 0 | 3.120769  | -1.486639 | -4.223571 |
| 55 | 1  | 0 | 4.307963  | -0.398384 | -3.413992 |
| 56 | 6  | 0 | 5.125761  | -3.058258 | -3.132441 |
| 57 | 1  | 0 | 4.764183  | -3.469794 | -4.099217 |

|     |   |   |           |           |           |
|-----|---|---|-----------|-----------|-----------|
| 58  | 1 | 0 | 5.485919  | -3.907519 | -2.513104 |
| 59  | 1 | 0 | 5.979371  | -2.380014 | -3.342393 |
| 60  | 6 | 0 | 3.543167  | -2.501195 | 2.708596  |
| 61  | 1 | 0 | 2.661077  | -3.127897 | 2.466372  |
| 62  | 6 | 0 | 4.496889  | -3.391083 | 3.514035  |
| 63  | 1 | 0 | 4.864629  | -4.227421 | 2.881756  |
| 64  | 1 | 0 | 3.965818  | -3.829031 | 4.386281  |
| 65  | 1 | 0 | 5.369203  | -2.815551 | 3.889616  |
| 66  | 6 | 0 | 3.031136  | -1.335766 | 3.562414  |
| 67  | 1 | 0 | 3.860225  | -0.679944 | 3.900139  |
| 68  | 1 | 0 | 2.521986  | -1.726017 | 4.466957  |
| 69  | 1 | 0 | 2.305221  | -0.727951 | 2.981638  |
| 70  | 6 | 0 | 1.368958  | -2.601577 | -0.344517 |
| 71  | 6 | 0 | 0.281835  | -3.623280 | -0.667650 |
| 72  | 1 | 0 | 0.439139  | -4.547463 | -0.105485 |
| 73  | 6 | 0 | 0.289033  | -3.919323 | -2.172595 |
| 74  | 1 | 0 | 1.205053  | -4.439681 | -2.459710 |
| 75  | 1 | 0 | 0.231831  | -2.978657 | -2.727794 |
| 76  | 6 | 0 | -0.962686 | -4.783230 | -2.381480 |
| 77  | 1 | 0 | -0.688982 | -5.834648 | -2.256768 |
| 78  | 6 | 0 | -1.727096 | -4.552591 | -3.704288 |
| 79  | 1 | 0 | -1.063108 | -4.228974 | -4.513048 |
| 80  | 1 | 0 | -2.195585 | -5.491576 | -4.021670 |
| 81  | 6 | 0 | -2.809367 | -3.513840 | -3.360627 |
| 82  | 1 | 0 | -3.651934 | -3.546704 | -4.058152 |
| 83  | 1 | 0 | -2.385617 | -2.505808 | -3.379351 |
| 84  | 6 | 0 | -3.223692 | -3.871709 | -1.921492 |
| 85  | 1 | 0 | -3.698948 | -3.050311 | -1.383313 |
| 86  | 1 | 0 | -3.922352 | -4.717260 | -1.931239 |
| 87  | 6 | 0 | -1.935678 | -4.361768 | -1.254711 |
| 88  | 1 | 0 | -2.100947 | -5.165638 | -0.536454 |
| 89  | 6 | 0 | -1.679084 | -3.419432 | 1.006545  |
| 90  | 1 | 0 | -2.690771 | -3.818089 | 0.965486  |
| 91  | 1 | 0 | -1.009572 | -4.128077 | 1.489893  |
| 92  | 6 | 0 | -1.793499 | -2.770575 | 3.357073  |
| 93  | 1 | 0 | -2.286186 | -3.737523 | 3.248523  |
| 94  | 6 | 0 | -0.421501 | -2.861290 | 4.029986  |
| 95  | 1 | 0 | 0.390654  | -2.983308 | 3.312905  |
| 96  | 1 | 0 | -0.439106 | -3.745178 | 4.679146  |
| 97  | 6 | 0 | -0.313501 | -1.580983 | 4.879429  |
| 98  | 1 | 0 | 0.018840  | -0.751227 | 4.248142  |
| 99  | 1 | 0 | 0.393198  | -1.684644 | 5.708738  |
| 100 | 6 | 0 | -1.752855 | -1.340788 | 5.363570  |
| 101 | 1 | 0 | -1.940195 | -0.304434 | 5.665285  |

|     |   |   |           |           |           |
|-----|---|---|-----------|-----------|-----------|
| 102 | 1 | 0 | -1.969849 | -1.978368 | 6.228697  |
| 103 | 6 | 0 | -2.640870 | -1.768346 | 4.174808  |
| 104 | 1 | 0 | -3.564012 | -2.247345 | 4.512907  |
| 105 | 6 | 0 | -2.995339 | -0.652357 | 3.185317  |
| 106 | 1 | 0 | -2.225499 | 0.123655  | 3.154699  |
| 107 | 1 | 0 | -3.947899 | -0.185030 | 3.430982  |
| 108 | 6 | 0 | -3.037168 | -1.365312 | 1.825969  |
| 109 | 1 | 0 | -3.838836 | -2.107647 | 1.811917  |
| 110 | 6 | 0 | -3.235369 | -0.331185 | 0.711299  |
| 111 | 6 | 0 | -5.004219 | 0.941358  | -0.352719 |
| 112 | 6 | 0 | -4.862331 | 1.128435  | -1.755237 |
| 113 | 6 | 0 | -5.397635 | 2.287297  | -2.348619 |
| 114 | 1 | 0 | -5.329076 | 2.445440  | -3.416545 |
| 115 | 6 | 0 | -6.023540 | 3.259860  | -1.579634 |
| 116 | 1 | 0 | -6.412749 | 4.152842  | -2.051878 |
| 117 | 6 | 0 | -6.165667 | 3.083363  | -0.209561 |
| 118 | 1 | 0 | -6.664615 | 3.857459  | 0.358251  |
| 119 | 6 | 0 | -5.693108 | 1.918203  | 0.421095  |
| 120 | 6 | 0 | -5.930643 | 1.741087  | 1.916195  |
| 121 | 1 | 0 | -5.591472 | 0.743402  | 2.243947  |
| 122 | 6 | 0 | -7.423749 | 1.802719  | 2.263861  |
| 123 | 1 | 0 | -7.576550 | 1.538173  | 3.332239  |
| 124 | 1 | 0 | -7.991079 | 1.073610  | 1.646465  |
| 125 | 1 | 0 | -7.842286 | 2.817278  | 2.096978  |
| 126 | 6 | 0 | -5.133084 | 2.770022  | 2.724840  |
| 127 | 1 | 0 | -4.053136 | 2.700045  | 2.473825  |
| 128 | 1 | 0 | -5.246229 | 2.573244  | 3.812664  |
| 129 | 1 | 0 | -5.481437 | 3.803882  | 2.516577  |
| 130 | 6 | 0 | -4.193393 | 0.086912  | -2.642290 |
| 131 | 1 | 0 | -3.668071 | -0.665028 | -2.021493 |
| 132 | 6 | 0 | -5.244511 | -0.662902 | -3.467046 |
| 133 | 1 | 0 | -5.934519 | -1.213947 | -2.792557 |
| 134 | 1 | 0 | -4.757106 | -1.396931 | -4.141048 |
| 135 | 1 | 0 | -5.839508 | 0.037200  | -4.091562 |
| 136 | 6 | 0 | -3.130916 | 0.716806  | -3.556687 |
| 137 | 1 | 0 | -3.593811 | 1.242097  | -4.418788 |
| 138 | 1 | 0 | -2.456266 | -0.068408 | -3.958277 |
| 139 | 1 | 0 | -2.521282 | 1.451501  | -2.992278 |
| 140 | 8 | 0 | -2.340344 | 0.456107  | 0.359836  |
| 141 | 6 | 0 | 1.785779  | 1.477687  | -4.986519 |
| 142 | 1 | 0 | 1.640183  | 0.416899  | -4.765881 |
| 143 | 1 | 0 | 1.437509  | 1.653502  | -6.010138 |
| 144 | 1 | 0 | 2.855284  | 1.705480  | -4.951786 |
| 145 | 6 | 0 | 0.916013  | 3.822063  | -4.434719 |

|     |   |   |          |          |           |
|-----|---|---|----------|----------|-----------|
| 146 | 1 | 0 | 1.911224 | 4.271017 | -4.501245 |
| 147 | 1 | 0 | 0.446799 | 3.901905 | -5.420947 |
| 148 | 1 | 0 | 0.317677 | 4.405501 | -3.726586 |

---

### L3a-Ca(II)-COM-1

Zero-point correction= 1.17582 a.u.

Thermal correction to Gibbs Free Energy= 1.06975 a.u.

Sum of electronic and zero-point Energies= -6962.19294 a.u.

Sum of electronic and thermal Free Energies= -6962.29900 a.u.

The number of imaginary frequencies        0

Standard orientation

---

| Center<br>Number | Atomic<br>Number | Atomic<br>Type | Coordinates (Angstroms) |           |           |
|------------------|------------------|----------------|-------------------------|-----------|-----------|
|                  |                  |                | X                       | Y         | Z         |
| 1                | 6                | 0              | -1.895454               | -1.332716 | 1.663511  |
| 2                | 6                | 0              | -2.688942               | -1.950301 | 0.473001  |
| 3                | 6                | 0              | -3.912280               | -2.483462 | 1.079670  |
| 4                | 6                | 0              | -3.850313               | -2.195647 | 2.460493  |
| 5                | 7                | 0              | -2.646326               | -1.519931 | 2.776533  |
| 6                | 8                | 0              | -2.290126               | -1.939762 | -0.671288 |
| 7                | 8                | 0              | -0.794473               | -0.789678 | 1.597856  |
| 8                | 6                | 0              | -2.250998               | -1.139502 | 4.124563  |
| 9                | 6                | 0              | -5.024948               | -3.144239 | 0.566614  |
| 10               | 6                | 0              | -4.869386               | -2.543448 | 3.328947  |
| 11               | 6                | 0              | -5.980272               | -3.203434 | 2.780299  |
| 12               | 6                | 0              | -6.069831               | -3.507562 | 1.420335  |
| 13               | 1                | 0              | -2.064160               | -2.032285 | 4.730032  |
| 14               | 1                | 0              | -1.337824               | -0.547580 | 4.055571  |
| 15               | 1                | 0              | -3.038360               | -0.543633 | 4.593672  |
| 16               | 1                | 0              | -4.821087               | -2.319866 | 4.388647  |
| 17               | 1                | 0              | -6.798396               | -3.489963 | 3.434248  |
| 18               | 1                | 0              | -6.941457               | -4.021166 | 1.031100  |
| 19               | 8                | 0              | 1.163366                | 1.622439  | 1.929623  |
| 20               | 8                | 0              | 2.976198                | 0.001232  | 0.490735  |
| 21               | 8                | 0              | 1.186346                | 2.309650  | -1.298219 |
| 22               | 7                | 0              | 4.473432                | -0.892538 | 1.946685  |
| 23               | 1                | 0              | 5.012200                | -0.782340 | 2.797793  |
| 24               | 7                | 0              | 2.361095                | 2.215576  | 2.253208  |
| 25               | 7                | 0              | -3.057704               | 2.936676  | -1.104877 |
| 26               | 1                | 0              | -3.326135               | 3.712721  | -1.699838 |
| 27               | 7                | 0              | 0.621003                | 3.555830  | -1.248023 |
| 28               | 6                | 0              | 4.765952                | -2.002101 | 1.120617  |

|    |   |   |           |           |           |
|----|---|---|-----------|-----------|-----------|
| 29 | 6 | 0 | 5.882790  | -1.956857 | 0.246742  |
| 30 | 6 | 0 | 6.141626  | -3.061788 | -0.584588 |
| 31 | 1 | 0 | 6.977359  | -3.053031 | -1.271715 |
| 32 | 6 | 0 | 5.322394  | -4.185769 | -0.551869 |
| 33 | 1 | 0 | 5.533030  | -5.024741 | -1.202543 |
| 34 | 6 | 0 | 4.228452  | -4.232471 | 0.306688  |
| 35 | 1 | 0 | 3.606951  | -5.118000 | 0.301038  |
| 36 | 6 | 0 | 3.931171  | -3.150255 | 1.154977  |
| 37 | 6 | 0 | 2.721942  | -3.231869 | 2.082685  |
| 38 | 1 | 0 | 2.655888  | -2.327534 | 2.721756  |
| 39 | 6 | 0 | 1.416620  | -3.296033 | 1.280966  |
| 40 | 1 | 0 | 1.327921  | -2.405367 | 0.622380  |
| 41 | 1 | 0 | 0.546181  | -3.302665 | 1.971099  |
| 42 | 1 | 0 | 1.370624  | -4.212372 | 0.655456  |
| 43 | 6 | 0 | 2.834533  | -4.420996 | 3.044469  |
| 44 | 1 | 0 | 2.007780  | -4.390546 | 3.786470  |
| 45 | 1 | 0 | 3.795569  | -4.373714 | 3.600076  |
| 46 | 1 | 0 | 2.779420  | -5.389194 | 2.503762  |
| 47 | 6 | 0 | 6.783634  | -0.728381 | 0.167863  |
| 48 | 1 | 0 | 6.469814  | 0.037533  | 0.907424  |
| 49 | 6 | 0 | 8.237285  | -1.079857 | 0.507047  |
| 50 | 1 | 0 | 8.288179  | -1.582567 | 1.496574  |
| 51 | 1 | 0 | 8.850732  | -0.154774 | 0.560138  |
| 52 | 1 | 0 | 8.684609  | -1.748707 | -0.258096 |
| 53 | 6 | 0 | 6.685069  | -0.065014 | -1.210645 |
| 54 | 1 | 0 | 7.053642  | -0.739115 | -2.012563 |
| 55 | 1 | 0 | 7.289885  | 0.866898  | -1.230672 |
| 56 | 1 | 0 | 5.630145  | 0.207953  | -1.428336 |
| 57 | 6 | 0 | 3.576438  | 0.045388  | 1.573532  |
| 58 | 6 | 0 | 3.399076  | 1.150079  | 2.617954  |
| 59 | 1 | 0 | 4.359304  | 1.669460  | 2.717909  |
| 60 | 6 | 0 | 2.927858  | 0.683026  | 3.995577  |
| 61 | 1 | 0 | 3.687708  | 0.090614  | 4.510375  |
| 62 | 1 | 0 | 2.025599  | 0.075221  | 3.883939  |
| 63 | 6 | 0 | 2.637120  | 2.008843  | 4.720703  |
| 64 | 1 | 0 | 3.555046  | 2.348464  | 5.209945  |
| 65 | 6 | 0 | 1.450101  | 1.978757  | 5.707804  |
| 66 | 1 | 0 | 1.332146  | 0.997541  | 6.181325  |
| 67 | 1 | 0 | 1.620251  | 2.708646  | 6.508684  |
| 68 | 6 | 0 | 0.233981  | 2.400216  | 4.866303  |
| 69 | 1 | 0 | -0.593443 | 2.776358  | 5.477331  |
| 70 | 1 | 0 | -0.134685 | 1.554851  | 4.276270  |
| 71 | 6 | 0 | 0.802752  | 3.469067  | 3.917041  |
| 72 | 1 | 0 | 0.191730  | 3.617817  | 3.027256  |

|     |   |   |           |           |           |
|-----|---|---|-----------|-----------|-----------|
| 73  | 1 | 0 | 0.881382  | 4.430230  | 4.441020  |
| 74  | 6 | 0 | 2.233116  | 3.009234  | 3.596735  |
| 75  | 1 | 0 | 2.935139  | 3.839157  | 3.509042  |
| 76  | 6 | 0 | 2.889297  | 3.091127  | 1.126960  |
| 77  | 1 | 0 | 3.876410  | 3.436085  | 1.449594  |
| 78  | 1 | 0 | 2.998277  | 2.434148  | 0.267976  |
| 79  | 6 | 0 | 2.039125  | 4.313225  | 0.771283  |
| 80  | 1 | 0 | 2.655564  | 4.921806  | 0.100245  |
| 81  | 1 | 0 | 1.890062  | 4.932238  | 1.663097  |
| 82  | 6 | 0 | 0.650735  | 4.117879  | 0.159328  |
| 83  | 1 | 0 | 0.066427  | 3.424719  | 0.761420  |
| 84  | 1 | 0 | 0.141139  | 5.085084  | 0.118089  |
| 85  | 6 | 0 | 1.295240  | 4.490884  | -2.301746 |
| 86  | 1 | 0 | 1.200880  | 5.499623  | -1.895313 |
| 87  | 6 | 0 | 2.744627  | 4.108654  | -2.635417 |
| 88  | 1 | 0 | 3.257637  | 3.613977  | -1.810295 |
| 89  | 1 | 0 | 3.280379  | 5.040782  | -2.857243 |
| 90  | 6 | 0 | 2.658790  | 3.234290  | -3.898952 |
| 91  | 1 | 0 | 2.433304  | 2.202302  | -3.617862 |
| 92  | 1 | 0 | 3.593210  | 3.234585  | -4.471194 |
| 93  | 6 | 0 | 1.485066  | 3.840761  | -4.688100 |
| 94  | 1 | 0 | 1.040688  | 3.137301  | -5.400742 |
| 95  | 1 | 0 | 1.825175  | 4.713529  | -5.259431 |
| 96  | 6 | 0 | 0.471715  | 4.293709  | -3.613442 |
| 97  | 1 | 0 | -0.006883 | 5.237677  | -3.892174 |
| 98  | 6 | 0 | -0.631975 | 3.275374  | -3.254687 |
| 99  | 1 | 0 | -0.306244 | 2.244326  | -3.413147 |
| 100 | 1 | 0 | -1.555733 | 3.444788  | -3.813204 |
| 101 | 6 | 0 | -0.822931 | 3.533227  | -1.760161 |
| 102 | 1 | 0 | -1.205235 | 4.549994  | -1.620958 |
| 103 | 6 | 0 | -1.755950 | 2.575197  | -1.023336 |
| 104 | 6 | 0 | -4.075358 | 2.065109  | -0.650670 |
| 105 | 6 | 0 | -4.416739 | 2.036437  | 0.727390  |
| 106 | 6 | 0 | -5.371481 | 1.104740  | 1.173024  |
| 107 | 1 | 0 | -5.644374 | 1.048433  | 2.218602  |
| 108 | 6 | 0 | -5.987236 | 0.234020  | 0.280115  |
| 109 | 1 | 0 | -6.719970 | -0.476655 | 0.639973  |
| 110 | 6 | 0 | -5.663612 | 0.269691  | -1.072443 |
| 111 | 1 | 0 | -6.154991 | -0.427394 | -1.737945 |
| 112 | 6 | 0 | -4.712094 | 1.182585  | -1.562548 |
| 113 | 6 | 0 | -4.361953 | 1.178290  | -3.047872 |
| 114 | 1 | 0 | -3.647769 | 1.992325  | -3.285867 |
| 115 | 6 | 0 | -5.600200 | 1.432921  | -3.916483 |
| 116 | 1 | 0 | -5.301278 | 1.551939  | -4.980079 |

|     |    |   |           |           |           |
|-----|----|---|-----------|-----------|-----------|
| 117 | 1  | 0 | -6.106659 | 2.368561  | -3.595948 |
| 118 | 1  | 0 | -6.323746 | 0.593167  | -3.853147 |
| 119 | 6  | 0 | -3.670302 | -0.130375 | -3.444164 |
| 120 | 1  | 0 | -2.751531 | -0.273132 | -2.836975 |
| 121 | 1  | 0 | -3.368001 | -0.095487 | -4.512785 |
| 122 | 1  | 0 | -4.340726 | -1.003017 | -3.297245 |
| 123 | 6  | 0 | -3.784045 | 3.001901  | 1.725971  |
| 124 | 1  | 0 | -3.089773 | 3.699313  | 1.212041  |
| 125 | 6  | 0 | -4.846886 | 3.880603  | 2.396661  |
| 126 | 1  | 0 | -5.454148 | 4.401574  | 1.625486  |
| 127 | 1  | 0 | -4.359012 | 4.653148  | 3.029020  |
| 128 | 1  | 0 | -5.523974 | 3.281303  | 3.041353  |
| 129 | 6  | 0 | -2.954140 | 2.251901  | 2.773515  |
| 130 | 1  | 0 | -3.591923 | 1.582264  | 3.386780  |
| 131 | 1  | 0 | -2.455572 | 2.976216  | 3.451786  |
| 132 | 1  | 0 | -2.166803 | 1.648041  | 2.276413  |
| 133 | 8  | 0 | -1.388353 | 1.569661  | -0.401864 |
| 134 | 20 | 0 | 0.662855  | 0.386168  | -0.051289 |
| 135 | 8  | 0 | 0.949626  | -0.889941 | -2.006807 |
| 136 | 16 | 0 | 1.339865  | -1.422514 | -3.351700 |
| 137 | 8  | 0 | 0.343679  | -2.332615 | -3.940675 |
| 138 | 8  | 0 | 1.926853  | -0.411472 | -4.250375 |
| 139 | 6  | 0 | 2.765787  | -2.524124 | -2.901920 |
| 140 | 9  | 0 | 2.366405  | -3.488683 | -2.057991 |
| 141 | 9  | 0 | 3.279482  | -3.108381 | -3.995510 |
| 142 | 9  | 0 | 3.740792  | -1.818511 | -2.307216 |
| 143 | 35 | 0 | -5.134507 | -3.560054 | -1.281887 |

---

### L3a-Ca(II)-COM-H

Zero-point correction= 1.18559 a.u.

Thermal correction to Gibbs Free Energy= 1.08114 a.u.

Sum of electronic and zero-point Energies= -4388.63667 a.u.

Sum of electronic and thermal Free Energies= -4388.74111 a.u.

The number of imaginary frequencies        0

Standard orientation

---

| Center<br>Number | Atomic<br>Number | Atomic<br>Type | Coordinates (Angstroms) |           |           |
|------------------|------------------|----------------|-------------------------|-----------|-----------|
|                  |                  |                | X                       | Y         | Z         |
| 1                | 6                | 0              | -2.019242               | -2.364729 | -0.451202 |
| 2                | 6                | 0              | -2.552737               | -1.958069 | -1.860706 |
| 3                | 6                | 0              | -3.729473               | -2.799251 | -2.073081 |
| 4                | 6                | 0              | -3.873751               | -3.608075 | -0.929766 |

|    |   |   |           |           |           |
|----|---|---|-----------|-----------|-----------|
| 5  | 7 | 0 | -2.846428 | -3.333762 | 0.012725  |
| 6  | 8 | 0 | -2.026214 | -1.119096 | -2.561557 |
| 7  | 8 | 0 | -1.031475 | -1.898805 | 0.116872  |
| 8  | 6 | 0 | -2.675598 | -4.047100 | 1.268631  |
| 9  | 6 | 0 | -4.634771 | -2.878689 | -3.127948 |
| 10 | 6 | 0 | -4.915532 | -4.512728 | -0.813275 |
| 11 | 6 | 0 | -5.822933 | -4.586541 | -1.884171 |
| 12 | 6 | 0 | -5.692729 | -3.786948 | -3.025096 |
| 13 | 1 | 0 | -2.385809 | -5.085956 | 1.078741  |
| 14 | 1 | 0 | -1.891143 | -3.549591 | 1.839387  |
| 15 | 1 | 0 | -3.609147 | -4.034096 | 1.837568  |
| 16 | 1 | 0 | -5.036069 | -5.142009 | 0.061808  |
| 17 | 1 | 0 | -6.650044 | -5.287604 | -1.817720 |
| 18 | 1 | 0 | -6.416218 | -3.872177 | -3.829587 |
| 19 | 8 | 0 | 0.496343  | -0.321667 | 2.410123  |
| 20 | 8 | 0 | 2.652448  | -0.217928 | 0.575157  |
| 21 | 8 | 0 | 0.540083  | 2.491695  | 0.681353  |
| 22 | 7 | 0 | 4.203371  | -1.758068 | 1.198910  |
| 23 | 1 | 0 | 4.662721  | -2.254024 | 1.953754  |
| 24 | 7 | 0 | 1.549079  | -0.036602 | 3.248484  |
| 25 | 7 | 0 | -3.752550 | 2.384101  | 0.558167  |
| 26 | 1 | 0 | -4.133589 | 3.319087  | 0.652014  |
| 27 | 7 | 0 | -0.246696 | 3.252365  | 1.504086  |
| 28 | 6 | 0 | 4.735330  | -1.902801 | -0.102848 |
| 29 | 6 | 0 | 5.877035  | -1.153072 | -0.486296 |
| 30 | 6 | 0 | 6.376007  | -1.293946 | -1.794117 |
| 31 | 1 | 0 | 7.236360  | -0.725876 | -2.121928 |
| 32 | 6 | 0 | 5.767131  | -2.156717 | -2.700069 |
| 33 | 1 | 0 | 6.160514  | -2.248182 | -3.704310 |
| 34 | 6 | 0 | 4.649638  | -2.895538 | -2.323797 |
| 35 | 1 | 0 | 4.195192  | -3.550520 | -3.055284 |
| 36 | 6 | 0 | 4.116742  | -2.786301 | -1.026500 |
| 37 | 6 | 0 | 2.889412  | -3.609547 | -0.645123 |
| 38 | 1 | 0 | 2.632170  | -3.458240 | 0.423251  |
| 39 | 6 | 0 | 1.662534  | -3.175040 | -1.455212 |
| 40 | 1 | 0 | 1.459557  | -2.094838 | -1.291136 |
| 41 | 1 | 0 | 0.768336  | -3.747367 | -1.128404 |
| 42 | 1 | 0 | 1.811304  | -3.353229 | -2.541045 |
| 43 | 6 | 0 | 3.150578  | -5.112137 | -0.806888 |
| 44 | 1 | 0 | 2.290810  | -5.693094 | -0.409156 |
| 45 | 1 | 0 | 4.056802  | -5.406284 | -0.235017 |
| 46 | 1 | 0 | 3.292468  | -5.389061 | -1.872635 |
| 47 | 6 | 0 | 6.550490  | -0.179036 | 0.475413  |
| 48 | 1 | 0 | 6.064830  | -0.212536 | 1.473061  |



|    |   |   |           |           |           |
|----|---|---|-----------|-----------|-----------|
| 49 | 6 | 0 | 8.021534  | -0.547398 | 0.703803  |
| 50 | 1 | 0 | 8.103842  | -1.603722 | 1.038235  |
| 51 | 1 | 0 | 8.457696  | 0.098398  | 1.495938  |
| 52 | 1 | 0 | 8.623260  | -0.416227 | -0.220254 |
| 53 | 6 | 0 | 6.415383  | 1.264099  | -0.023320 |
| 54 | 1 | 0 | 6.937503  | 1.408904  | -0.992844 |
| 55 | 1 | 0 | 6.851607  | 1.967310  | 0.718053  |
| 56 | 1 | 0 | 5.342786  | 1.524874  | -0.150681 |
| 57 | 6 | 0 | 3.174184  | -0.920623 | 1.451789  |
| 58 | 6 | 0 | 2.746137  | -0.933623 | 2.920960  |
| 59 | 1 | 0 | 3.588676  | -0.560060 | 3.514747  |
| 60 | 6 | 0 | 2.303308  | -2.292329 | 3.465517  |
| 61 | 1 | 0 | 3.133135  | -2.999846 | 3.528340  |
| 62 | 1 | 0 | 1.533178  | -2.712209 | 2.812360  |
| 63 | 6 | 0 | 1.742451  | -1.933436 | 4.852682  |
| 64 | 1 | 0 | 2.559340  | -1.969047 | 5.579900  |
| 65 | 6 | 0 | 0.535337  | -2.775291 | 5.319963  |
| 66 | 1 | 0 | 0.573333  | -3.800436 | 4.934650  |
| 67 | 1 | 0 | 0.533986  | -2.838389 | 6.414889  |
| 68 | 6 | 0 | -0.696011 | -1.989061 | 4.840163  |
| 69 | 1 | 0 | -1.605033 | -2.247897 | 5.393564  |
| 70 | 1 | 0 | -0.878700 | -2.175961 | 3.777244  |
| 71 | 6 | 0 | -0.284474 | -0.518919 | 5.030482  |
| 72 | 1 | 0 | -0.869418 | 0.171047  | 4.423244  |
| 73 | 1 | 0 | -0.403441 | -0.231001 | 6.082873  |
| 74 | 6 | 0 | 1.217832  | -0.473121 | 4.715139  |
| 75 | 1 | 0 | 1.762902  | 0.224367  | 5.352196  |
| 76 | 6 | 0 | 1.959364  | 1.426483  | 3.175478  |
| 77 | 1 | 0 | 2.852479  | 1.521109  | 3.800617  |
| 78 | 1 | 0 | 2.223213  | 1.608643  | 2.136974  |
| 79 | 6 | 0 | 0.918914  | 2.440642  | 3.657657  |
| 80 | 1 | 0 | 1.444392  | 3.399817  | 3.723849  |
| 81 | 1 | 0 | 0.621770  | 2.205769  | 4.685814  |
| 82 | 6 | 0 | -0.382912 | 2.619373  | 2.874329  |
| 83 | 1 | 0 | -0.855866 | 1.654531  | 2.702549  |
| 84 | 1 | 0 | -1.058528 | 3.260832  | 3.447960  |
| 85 | 6 | 0 | 0.290376  | 4.718503  | 1.549898  |
| 86 | 1 | 0 | -0.007868 | 5.105600  | 2.526206  |
| 87 | 6 | 0 | 1.799273  | 4.835991  | 1.290094  |
| 88 | 1 | 0 | 2.355797  | 3.948501  | 1.592574  |
| 89 | 1 | 0 | 2.163789  | 5.683489  | 1.885107  |
| 90 | 6 | 0 | 1.935814  | 5.145600  | -0.211127 |
| 91 | 1 | 0 | 1.895105  | 4.215697  | -0.784001 |
| 92 | 1 | 0 | 2.878859  | 5.650024  | -0.449300 |

|     |    |   |           |           |           |
|-----|----|---|-----------|-----------|-----------|
| 93  | 6  | 0 | 0.706859  | 6.018497  | -0.521361 |
| 94  | 1  | 0 | 0.434327  | 6.010690  | -1.582366 |
| 95  | 1  | 0 | 0.904749  | 7.061119  | -0.242596 |
| 96  | 6  | 0 | -0.421253 | 5.454151  | 0.370723  |
| 97  | 1  | 0 | -1.053226 | 6.255661  | 0.765574  |
| 98  | 6  | 0 | -1.332760 | 4.392956  | -0.282887 |
| 99  | 1  | 0 | -0.814237 | 3.831421  | -1.063910 |
| 100 | 1  | 0 | -2.245241 | 4.823350  | -0.702464 |
| 101 | 6  | 0 | -1.636909 | 3.471849  | 0.898157  |
| 102 | 1  | 0 | -2.204931 | 4.031803  | 1.648908  |
| 103 | 6  | 0 | -2.412695 | 2.196354  | 0.578780  |
| 104 | 6  | 0 | -4.619959 | 1.350165  | 0.134515  |
| 105 | 6  | 0 | -5.001140 | 0.330888  | 1.046815  |
| 106 | 6  | 0 | -5.792195 | -0.736077 | 0.584301  |
| 107 | 1  | 0 | -6.088252 | -1.535600 | 1.250809  |
| 108 | 6  | 0 | -6.213749 | -0.787359 | -0.739969 |
| 109 | 1  | 0 | -6.822382 | -1.615419 | -1.079053 |
| 110 | 6  | 0 | -5.853495 | 0.217901  | -1.631768 |
| 111 | 1  | 0 | -6.189573 | 0.140638  | -2.657224 |
| 112 | 6  | 0 | -5.061664 | 1.303185  | -1.213716 |
| 113 | 6  | 0 | -4.672211 | 2.381854  | -2.220264 |
| 114 | 1  | 0 | -4.108985 | 3.198011  | -1.723386 |
| 115 | 6  | 0 | -5.909947 | 3.038805  | -2.844604 |
| 116 | 1  | 0 | -5.606182 | 3.904406  | -3.471628 |
| 117 | 1  | 0 | -6.587388 | 3.414031  | -2.047801 |
| 118 | 1  | 0 | -6.470211 | 2.326868  | -3.486574 |
| 119 | 6  | 0 | -3.745533 | 1.815175  | -3.300611 |
| 120 | 1  | 0 | -2.818415 | 1.422131  | -2.833398 |
| 121 | 1  | 0 | -3.450713 | 2.615998  | -4.012205 |
| 122 | 1  | 0 | -4.238276 | 1.000472  | -3.872649 |
| 123 | 6  | 0 | -4.587239 | 0.379215  | 2.514865  |
| 124 | 1  | 0 | -4.005006 | 1.299720  | 2.729052  |
| 125 | 6  | 0 | -5.813321 | 0.430462  | 3.434331  |
| 126 | 1  | 0 | -6.469034 | 1.281182  | 3.149265  |
| 127 | 1  | 0 | -5.493774 | 0.581382  | 4.487787  |
| 128 | 1  | 0 | -6.402242 | -0.509449 | 3.381210  |
| 129 | 6  | 0 | -3.682519 | -0.803957 | 2.874839  |
| 130 | 1  | 0 | -4.221462 | -1.768111 | 2.770750  |
| 131 | 1  | 0 | -3.338125 | -0.710184 | 3.926225  |
| 132 | 1  | 0 | -2.788149 | -0.816229 | 2.217238  |
| 133 | 8  | 0 | -1.897419 | 1.090964  | 0.365642  |
| 134 | 20 | 0 | 0.321943  | 0.220284  | 0.085045  |
| 135 | 8  | 0 | 1.018829  | 0.946514  | -2.053411 |
| 136 | 16 | 0 | 1.583960  | 1.511469  | -3.319549 |

|     |   |   |           |           |           |
|-----|---|---|-----------|-----------|-----------|
| 137 | 8 | 0 | 0.779041  | 1.217638  | -4.517574 |
| 138 | 8 | 0 | 2.089571  | 2.889973  | -3.185336 |
| 139 | 6 | 0 | 3.111946  | 0.478167  | -3.529474 |
| 140 | 9 | 0 | 2.788351  | -0.820777 | -3.637775 |
| 141 | 9 | 0 | 3.782417  | 0.836453  | -4.635525 |
| 142 | 9 | 0 | 3.931972  | 0.623791  | -2.477128 |
| 143 | 1 | 0 | -4.515236 | -2.244481 | -4.001506 |

---

### L3a-Ca(II)-COM

Zero-point correction= 1.14739 a.u.

Thermal correction to Gibbs Free Energy= 1.05059 a.u.

Sum of electronic and zero-point Energies= -6000.39210 a.u.

Sum of electronic and thermal Free Energies= -6000.48890 a.u.

The number of imaginary frequencies 0

Standard orientation

---

| Center<br>Number | Atomic<br>Number | Atomic<br>Type | Coordinates (Angstroms) |           |           |
|------------------|------------------|----------------|-------------------------|-----------|-----------|
|                  |                  |                | X                       | Y         | Z         |
| 1                | 6                | 0              | -1.855315               | 1.211585  | -1.893857 |
| 2                | 6                | 0              | -2.025725               | 2.048628  | -0.603925 |
| 3                | 6                | 0              | -3.286362               | 2.743605  | -0.758868 |
| 4                | 6                | 0              | -3.840100               | 2.305840  | -1.988439 |
| 5                | 7                | 0              | -2.966732               | 1.398173  | -2.640711 |
| 6                | 8                | 0              | -1.190619               | 2.013508  | 0.290861  |
| 7                | 6                | 0              | -3.986194               | 3.659971  | 0.028712  |
| 8                | 6                | 0              | -5.076884               | 2.742062  | -2.423539 |
| 9                | 8                | 0              | -0.861080               | 0.528626  | -2.135867 |
| 10               | 6                | 0              | -3.195253               | 0.826921  | -3.962219 |
| 11               | 1                | 0              | -3.195845               | 1.617271  | -4.718923 |
| 12               | 1                | 0              | -2.386704               | 0.125986  | -4.169936 |
| 13               | 1                | 0              | -4.152878               | 0.301327  | -3.984758 |
| 14               | 6                | 0              | -5.237439               | 4.112027  | -0.389175 |
| 15               | 6                | 0              | -5.764363               | 3.646503  | -1.597547 |
| 16               | 35               | 0              | -3.232755               | 4.308722  | 1.643966  |
| 17               | 1                | 0              | -5.796315               | 4.819852  | 0.211911  |
| 18               | 1                | 0              | -6.740533               | 4.004084  | -1.910831 |
| 19               | 1                | 0              | -5.507307               | 2.406405  | -3.359837 |
| 20               | 8                | 0              | 2.901045                | 0.619343  | -0.378109 |
| 21               | 8                | 0              | 1.495986                | -1.643724 | -1.365189 |
| 22               | 8                | 0              | 0.956307                | -1.314738 | 1.802590  |
| 23               | 8                | 0              | -1.508614               | -1.035988 | 0.427888  |
| 24               | 7                | 0              | 5.118686                | 0.620570  | -0.864779 |

|    |   |   |           |           |           |
|----|---|---|-----------|-----------|-----------|
| 25 | 1 | 0 | 5.908360  | 0.132023  | -1.269972 |
| 26 | 7 | 0 | 2.748493  | -2.200661 | -1.318762 |
| 27 | 7 | 0 | -3.166876 | -2.387996 | 1.191065  |
| 28 | 1 | 0 | -3.473433 | -3.051932 | 1.893332  |
| 29 | 7 | 0 | 0.444729  | -2.559747 | 2.072511  |
| 30 | 6 | 0 | 5.374924  | 1.817270  | -0.157598 |
| 31 | 6 | 0 | 5.778137  | 1.761090  | 1.201953  |
| 32 | 6 | 0 | 5.994683  | 2.964695  | 1.897159  |
| 33 | 1 | 0 | 6.294580  | 2.956495  | 2.936754  |
| 34 | 6 | 0 | 5.820361  | 4.192940  | 1.266986  |
| 35 | 1 | 0 | 5.987911  | 5.109471  | 1.818062  |
| 36 | 6 | 0 | 5.429053  | 4.248648  | -0.067196 |
| 37 | 1 | 0 | 5.299462  | 5.219719  | -0.526398 |
| 38 | 6 | 0 | 5.204681  | 3.070178  | -0.801682 |
| 39 | 6 | 0 | 4.780406  | 3.163038  | -2.264303 |
| 40 | 1 | 0 | 4.679924  | 2.151007  | -2.708534 |
| 41 | 6 | 0 | 3.408642  | 3.833782  | -2.396854 |
| 42 | 1 | 0 | 2.656880  | 3.288668  | -1.786645 |
| 43 | 1 | 0 | 3.072234  | 3.810504  | -3.455633 |
| 44 | 1 | 0 | 3.441302  | 4.892274  | -2.062379 |
| 45 | 6 | 0 | 5.834541  | 3.893773  | -3.104832 |
| 46 | 1 | 0 | 5.560119  | 3.852483  | -4.180772 |
| 47 | 1 | 0 | 6.824775  | 3.404198  | -2.984262 |
| 48 | 1 | 0 | 5.923818  | 4.960447  | -2.809444 |
| 49 | 6 | 0 | 5.958184  | 0.430228  | 1.926574  |
| 50 | 1 | 0 | 5.773001  | -0.421343 | 1.238926  |
| 51 | 6 | 0 | 7.394420  | 0.263608  | 2.437029  |
| 52 | 1 | 0 | 8.113902  | 0.383873  | 1.598984  |
| 53 | 1 | 0 | 7.532385  | -0.753175 | 2.863547  |
| 54 | 1 | 0 | 7.635247  | 1.007265  | 3.225750  |
| 55 | 6 | 0 | 4.948227  | 0.287965  | 3.070949  |
| 56 | 1 | 0 | 5.120932  | 1.047968  | 3.861989  |
| 57 | 1 | 0 | 5.034246  | -0.719380 | 3.531170  |
| 58 | 1 | 0 | 3.914624  | 0.406703  | 2.681745  |
| 59 | 6 | 0 | 3.881242  | 0.087441  | -0.921211 |
| 60 | 6 | 0 | 3.823628  | -1.195122 | -1.748366 |
| 61 | 1 | 0 | 4.777001  | -1.720432 | -1.634166 |
| 62 | 6 | 0 | 3.536254  | -1.028510 | -3.238541 |
| 63 | 1 | 0 | 4.348106  | -0.502240 | -3.746092 |
| 64 | 1 | 0 | 2.608416  | -0.467061 | -3.375053 |
| 65 | 6 | 0 | 3.400853  | -2.497094 | -3.695753 |
| 66 | 1 | 0 | 4.393369  | -2.861129 | -3.977469 |
| 67 | 6 | 0 | 2.367364  | -2.767287 | -4.810764 |
| 68 | 1 | 0 | 2.248222  | -1.906994 | -5.478662 |

|     |   |   |           |           |           |
|-----|---|---|-----------|-----------|-----------|
| 69  | 1 | 0 | 2.705284  | -3.611085 | -5.424402 |
| 70  | 6 | 0 | 1.072182  | -3.142803 | -4.070311 |
| 71  | 1 | 0 | 0.383790  | -3.721755 | -4.695281 |
| 72  | 1 | 0 | 0.552266  | -2.241547 | -3.732804 |
| 73  | 6 | 0 | 1.566104  | -3.935479 | -2.846338 |
| 74  | 1 | 0 | 0.840465  | -3.969441 | -2.033159 |
| 75  | 1 | 0 | 1.795076  | -4.968650 | -3.137101 |
| 76  | 6 | 0 | 2.892359  | -3.277261 | -2.441518 |
| 77  | 1 | 0 | 3.626164  | -3.991263 | -2.064012 |
| 78  | 6 | 0 | 3.079036  | -2.720747 | 0.069409  |
| 79  | 1 | 0 | 4.104012  | -3.099809 | 0.020719  |
| 80  | 1 | 0 | 3.047154  | -1.850179 | 0.721697  |
| 81  | 6 | 0 | 2.177101  | -3.826595 | 0.619626  |
| 82  | 1 | 0 | 2.677545  | -4.196000 | 1.521873  |
| 83  | 1 | 0 | 2.168781  | -4.674907 | -0.074175 |
| 84  | 6 | 0 | 0.710187  | -3.529636 | 0.933140  |
| 85  | 1 | 0 | 0.216297  | -3.101237 | 0.062790  |
| 86  | 1 | 0 | 0.214781  | -4.465677 | 1.206030  |
| 87  | 6 | 0 | 0.972924  | -3.061917 | 3.455089  |
| 88  | 1 | 0 | 0.978287  | -4.150984 | 3.383912  |
| 89  | 6 | 0 | 2.335738  | -2.477912 | 3.851798  |
| 90  | 1 | 0 | 2.969943  | -2.248956 | 2.995408  |
| 91  | 1 | 0 | 2.847280  | -3.238941 | 4.454750  |
| 92  | 6 | 0 | 2.016686  | -1.249885 | 4.722505  |
| 93  | 1 | 0 | 1.793113  | -0.396273 | 4.076179  |
| 94  | 1 | 0 | 2.847298  | -0.972945 | 5.380608  |
| 95  | 6 | 0 | 0.758354  | -1.673223 | 5.500043  |
| 96  | 1 | 0 | 0.179773  | -0.823658 | 5.879201  |
| 97  | 1 | 0 | 1.041852  | -2.286071 | 6.364205  |
| 98  | 6 | 0 | -0.054612 | -2.531606 | 4.505368  |
| 99  | 1 | 0 | -0.533664 | -3.375681 | 5.010095  |
| 100 | 6 | 0 | -1.127216 | -1.780507 | 3.688303  |
| 101 | 1 | 0 | -0.877176 | -0.724888 | 3.553912  |
| 102 | 1 | 0 | -2.121704 | -1.853321 | 4.134768  |
| 103 | 6 | 0 | -1.064101 | -2.502325 | 2.344002  |
| 104 | 1 | 0 | -1.377094 | -3.541446 | 2.485277  |
| 105 | 6 | 0 | -1.908022 | -1.899055 | 1.223925  |
| 106 | 6 | 0 | -4.144431 | -1.825837 | 0.337491  |
| 107 | 6 | 0 | -4.213186 | -2.230118 | -1.021435 |
| 108 | 6 | 0 | -5.131635 | -1.592993 | -1.874990 |
| 109 | 1 | 0 | -5.204741 | -1.874511 | -2.917085 |
| 110 | 6 | 0 | -5.971971 | -0.592181 | -1.397967 |
| 111 | 1 | 0 | -6.670882 | -0.110311 | -2.069454 |
| 112 | 6 | 0 | -5.925943 | -0.215747 | -0.059406 |

|     |    |   |           |           |           |
|-----|----|---|-----------|-----------|-----------|
| 113 | 1  | 0 | -6.596845 | 0.562021  | 0.280622  |
| 114 | 6  | 0 | -5.026273 | -0.829671 | 0.831057  |
| 115 | 6  | 0 | -5.013251 | -0.408136 | 2.297212  |
| 116 | 1  | 0 | -4.279293 | -1.008294 | 2.872842  |
| 117 | 6  | 0 | -6.375399 | -0.650742 | 2.958413  |
| 118 | 1  | 0 | -6.312249 | -0.445505 | 4.048576  |
| 119 | 1  | 0 | -6.681194 | -1.710743 | 2.826230  |
| 120 | 1  | 0 | -7.160623 | 0.005163  | 2.526556  |
| 121 | 6  | 0 | -4.584798 | 1.053718  | 2.445290  |
| 122 | 1  | 0 | -3.587828 | 1.201933  | 1.980128  |
| 123 | 1  | 0 | -4.502493 | 1.322950  | 3.519989  |
| 124 | 1  | 0 | -5.317149 | 1.737806  | 1.967470  |
| 125 | 6  | 0 | -3.337112 | -3.355394 | -1.563642 |
| 126 | 1  | 0 | -2.693848 | -3.773431 | -0.761293 |
| 127 | 6  | 0 | -4.190828 | -4.522373 | -2.074553 |
| 128 | 1  | 0 | -4.877476 | -4.871965 | -1.273729 |
| 129 | 1  | 0 | -3.538872 | -5.374943 | -2.362348 |
| 130 | 1  | 0 | -4.792247 | -4.229559 | -2.961017 |
| 131 | 6  | 0 | -2.392926 | -2.847705 | -2.657939 |
| 132 | 1  | 0 | -2.955449 | -2.474286 | -3.539285 |
| 133 | 1  | 0 | -1.727022 | -3.670551 | -2.993113 |
| 134 | 1  | 0 | -1.756986 | -2.030326 | -2.260217 |
| 135 | 20 | 0 | 0.575620  | 0.066757  | -0.056242 |

---

### L3a-Ca(II)-COM-H

Zero-point correction= 1.14739 a.u.

Thermal correction to Gibbs Free Energy= 1.05059 a.u.

Sum of electronic and zero-point Energies= -6000.39210 a.u.

Sum of electronic and thermal Free Energies= -6000.48890 a.u.

The number of imaginary frequencies        0

Standard orientation

---

| Center<br>Number | Atomic<br>Number | Atomic<br>Type | Coordinates (Angstroms) |           |           |
|------------------|------------------|----------------|-------------------------|-----------|-----------|
|                  |                  |                | X                       | Y         | Z         |
| 1                | 6                | 0              | -1.965125               | -2.438559 | -0.068837 |
| 2                | 6                | 0              | -2.041778               | -2.065488 | -1.571766 |
| 3                | 6                | 0              | -3.247408               | -2.697835 | -2.065247 |
| 4                | 6                | 0              | -3.847176               | -3.341958 | -0.958245 |
| 5                | 7                | 0              | -3.063932               | -3.170590 | 0.216570  |
| 6                | 8                | 0              | -1.188583               | -1.357583 | -2.095686 |
| 7                | 6                | 0              | -3.845032               | -2.732880 | -3.326701 |
| 8                | 6                | 0              | -5.047701               | -4.016742 | -1.084353 |

|    |   |   |           |           |           |
|----|---|---|-----------|-----------|-----------|
| 9  | 8 | 0 | -1.042561 | -2.100293 | 0.673749  |
| 10 | 6 | 0 | -3.370444 | -3.753952 | 1.515813  |
| 11 | 1 | 0 | -3.329358 | -4.846023 | 1.457987  |
| 12 | 1 | 0 | -2.626107 | -3.400170 | 2.229591  |
| 13 | 1 | 0 | -4.367540 | -3.445891 | 1.840738  |
| 14 | 6 | 0 | -5.055408 | -3.413463 | -3.466097 |
| 15 | 6 | 0 | -5.640819 | -4.039000 | -2.358543 |
| 16 | 1 | 0 | -5.547086 | -3.457425 | -4.432149 |
| 17 | 1 | 0 | -6.585252 | -4.560922 | -2.481737 |
| 18 | 1 | 0 | -5.521879 | -4.508905 | -0.242555 |
| 19 | 8 | 0 | 2.750061  | -0.696478 | -0.207464 |
| 20 | 8 | 0 | 1.067834  | 0.055243  | 1.961468  |
| 21 | 8 | 0 | 0.694276  | 2.117839  | -0.498446 |
| 22 | 8 | 0 | -1.773649 | 0.821693  | -0.012349 |
| 23 | 7 | 0 | 4.932981  | -0.954131 | 0.362142  |
| 24 | 1 | 0 | 5.647174  | -0.878241 | 1.076532  |
| 25 | 7 | 0 | 2.254130  | 0.522949  | 2.465311  |
| 26 | 7 | 0 | -3.544718 | 2.223401  | 0.218122  |
| 27 | 1 | 0 | -3.895657 | 3.173385  | 0.167743  |
| 28 | 7 | 0 | 0.065332  | 3.142241  | 0.165424  |
| 29 | 6 | 0 | 5.349603  | -1.228788 | -0.960409 |
| 30 | 6 | 0 | 5.805252  | -0.171958 | -1.790797 |
| 31 | 6 | 0 | 6.184803  | -0.462155 | -3.113865 |
| 32 | 1 | 0 | 6.528749  | 0.322173  | -3.775273 |
| 33 | 6 | 0 | 6.119483  | -1.762442 | -3.605066 |
| 34 | 1 | 0 | 6.412281  | -1.967388 | -4.626940 |
| 35 | 6 | 0 | 5.677469  | -2.799862 | -2.789981 |
| 36 | 1 | 0 | 5.636315  | -3.798844 | -3.203557 |
| 37 | 6 | 0 | 5.291072  | -2.555870 | -1.459579 |
| 38 | 6 | 0 | 4.816250  | -3.714873 | -0.588393 |
| 39 | 1 | 0 | 4.583053  | -3.363983 | 0.438481  |
| 40 | 6 | 0 | 3.524247  | -4.325609 | -1.142685 |
| 41 | 1 | 0 | 2.743498  | -3.541265 | -1.242385 |
| 42 | 1 | 0 | 3.140800  | -5.104261 | -0.448748 |
| 43 | 1 | 0 | 3.690726  | -4.792770 | -2.136318 |
| 44 | 6 | 0 | 5.908187  | -4.780665 | -0.436033 |
| 45 | 1 | 0 | 5.583695  | -5.558635 | 0.287932  |
| 46 | 1 | 0 | 6.840929  | -4.318182 | -0.047618 |
| 47 | 1 | 0 | 6.130682  | -5.277619 | -1.403838 |
| 48 | 6 | 0 | 5.870083  | 1.267264  | -1.287677 |
| 49 | 1 | 0 | 5.559342  | 1.327473  | -0.223683 |
| 50 | 6 | 0 | 7.301494  | 1.813895  | -1.347090 |
| 51 | 1 | 0 | 7.989559  | 1.144048  | -0.788236 |
| 52 | 1 | 0 | 7.345601  | 2.819782  | -0.876800 |

|    |   |   |           |           |           |
|----|---|---|-----------|-----------|-----------|
| 53 | 1 | 0 | 7.660194  | 1.903255  | -2.394139 |
| 54 | 6 | 0 | 4.905806  | 2.165978  | -2.070149 |
| 55 | 1 | 0 | 5.199469  | 2.244133  | -3.138257 |
| 56 | 1 | 0 | 4.900382  | 3.187943  | -1.634909 |
| 57 | 1 | 0 | 3.874703  | 1.756706  | -2.012801 |
| 58 | 6 | 0 | 3.642878  | -0.689515 | 0.653615  |
| 59 | 6 | 0 | 3.412081  | -0.428683 | 2.141126  |
| 60 | 1 | 0 | 4.307320  | 0.051904  | 2.548057  |
| 61 | 6 | 0 | 3.081372  | -1.646557 | 3.000724  |
| 62 | 1 | 0 | 3.923099  | -2.341218 | 3.050579  |
| 63 | 1 | 0 | 2.214612  | -2.167056 | 2.585335  |
| 64 | 6 | 0 | 2.768192  | -0.990871 | 4.363337  |
| 65 | 1 | 0 | 3.702055  | -0.910682 | 4.927665  |
| 66 | 6 | 0 | 1.662422  | -1.667098 | 5.203144  |
| 67 | 1 | 0 | 1.604633  | -2.745023 | 5.015751  |
| 68 | 1 | 0 | 1.881928  | -1.533847 | 6.269470  |
| 69 | 6 | 0 | 0.369046  | -0.918596 | 4.836521  |
| 70 | 1 | 0 | -0.402780 | -1.011035 | 5.608244  |
| 71 | 1 | 0 | -0.038854 | -1.301753 | 3.896747  |
| 72 | 6 | 0 | 0.831534  | 0.536129  | 4.636593  |
| 73 | 1 | 0 | 0.142721  | 1.128458  | 4.033568  |
| 74 | 1 | 0 | 0.938831  | 1.031731  | 5.609981  |
| 75 | 6 | 0 | 2.235836  | 0.438255  | 4.024645  |
| 76 | 1 | 0 | 2.906496  | 1.229211  | 4.364595  |
| 77 | 6 | 0 | 2.581834  | 1.906455  | 1.932055  |
| 78 | 1 | 0 | 3.556415  | 2.175369  | 2.349994  |
| 79 | 1 | 0 | 2.671506  | 1.788691  | 0.853922  |
| 80 | 6 | 0 | 1.586948  | 3.020431  | 2.260619  |
| 81 | 1 | 0 | 2.080399  | 3.954391  | 1.968435  |
| 82 | 1 | 0 | 1.456589  | 3.089886  | 3.346490  |
| 83 | 6 | 0 | 0.175648  | 2.981570  | 1.672790  |
| 84 | 1 | 0 | -0.304431 | 2.032100  | 1.902386  |
| 85 | 1 | 0 | -0.407173 | 3.796813  | 2.110826  |
| 86 | 6 | 0 | 0.596672  | 4.517751  | -0.352778 |
| 87 | 1 | 0 | 0.482549  | 5.205815  | 0.486675  |
| 88 | 6 | 0 | 2.030008  | 4.467679  | -0.899120 |
| 89 | 1 | 0 | 2.646963  | 3.710558  | -0.415358 |
| 90 | 1 | 0 | 2.483094  | 5.447337  | -0.700760 |
| 91 | 6 | 0 | 1.882196  | 4.258569  | -2.416437 |
| 92 | 1 | 0 | 1.722470  | 3.196028  | -2.621108 |
| 93 | 1 | 0 | 2.765646  | 4.586097  | -2.974916 |
| 94 | 6 | 0 | 0.621306  | 5.065097  | -2.772674 |
| 95 | 1 | 0 | 0.153815  | 4.743092  | -3.709749 |
| 96 | 1 | 0 | 0.875428  | 6.126110  | -2.883077 |



|     |    |   |           |           |           |
|-----|----|---|-----------|-----------|-----------|
| 97  | 6  | 0 | -0.321445 | 4.885479  | -1.561794 |
| 98  | 1  | 0 | -0.865838 | 5.808695  | -1.343087 |
| 99  | 6  | 0 | -1.341495 | 3.732379  | -1.668415 |
| 100 | 1  | 0 | -0.985422 | 2.927430  | -2.316741 |
| 101 | 1  | 0 | -2.317779 | 4.067830  | -2.026032 |
| 102 | 6  | 0 | -1.414685 | 3.239257  | -0.224733 |
| 103 | 1  | 0 | -1.833840 | 4.034514  | 0.399668  |
| 104 | 6  | 0 | -2.234650 | 1.972523  | 0.005316  |
| 105 | 6  | 0 | -4.486091 | 1.169574  | 0.273217  |
| 106 | 6  | 0 | -4.668995 | 0.447802  | 1.481947  |
| 107 | 6  | 0 | -5.545806 | -0.651750 | 1.491388  |
| 108 | 1  | 0 | -5.701197 | -1.227294 | 2.394230  |
| 109 | 6  | 0 | -6.240806 | -1.018700 | 0.343352  |
| 110 | 1  | 0 | -6.911523 | -1.867823 | 0.368151  |
| 111 | 6  | 0 | -6.083521 | -0.294823 | -0.834444 |
| 112 | 1  | 0 | -6.642543 | -0.603329 | -1.707865 |
| 113 | 6  | 0 | -5.214481 | 0.809974  | -0.890529 |
| 114 | 6  | 0 | -5.069384 | 1.587662  | -2.195637 |
| 115 | 1  | 0 | -4.367407 | 2.437282  | -2.071356 |
| 116 | 6  | 0 | -6.407451 | 2.198402  | -2.629091 |
| 117 | 1  | 0 | -6.260271 | 2.848287  | -3.518234 |
| 118 | 1  | 0 | -6.824136 | 2.825143  | -1.811819 |
| 119 | 1  | 0 | -7.147533 | 1.412972  | -2.890884 |
| 120 | 6  | 0 | -4.485142 | 0.706856  | -3.304221 |
| 121 | 1  | 0 | -3.513058 | 0.281319  | -2.977892 |
| 122 | 1  | 0 | -4.301086 | 1.312825  | -4.217149 |
| 123 | 1  | 0 | -5.177067 | -0.120044 | -3.568464 |
| 124 | 6  | 0 | -3.959579 | 0.855950  | 2.770011  |
| 125 | 1  | 0 | -3.336011 | 1.759288  | 2.605144  |
| 126 | 6  | 0 | -4.969083 | 1.231075  | 3.861659  |
| 127 | 1  | 0 | -5.656565 | 2.021400  | 3.490507  |
| 128 | 1  | 0 | -4.437780 | 1.630730  | 4.751995  |
| 129 | 1  | 0 | -5.569771 | 0.353032  | 4.180412  |
| 130 | 6  | 0 | -3.011228 | -0.244716 | 3.256314  |
| 131 | 1  | 0 | -3.563930 | -1.171543 | 3.517044  |
| 132 | 1  | 0 | -2.463255 | 0.100055  | 4.158548  |
| 133 | 1  | 0 | -2.264701 | -0.476705 | 2.469183  |
| 134 | 20 | 0 | 0.384515  | -0.203168 | -0.259355 |
| 135 | 1  | 0 | -3.374690 | -2.238089 | -4.171035 |

---

**L3a-Mg(II)-COM-H**

Zero-point correction= 1.15935 a.u.

Thermal correction to Gibbs Free Energy=1.06820 a.u.

Sum of electronic and zero-point Energies=-2949.30264 a.u.

Sum of electronic and thermal Free Energies= -2949.39379 a.u.

The number of imaginary frequencies 0

Standard orientation

---

| Center<br>Number | Atomic<br>Number | Atomic<br>Type | Coordinates (Angstroms) |           |           |
|------------------|------------------|----------------|-------------------------|-----------|-----------|
|                  |                  |                | X                       | Y         | Z         |
| 1                | 6                | 0              | 0.900462                | 1.902663  | 1.080609  |
| 2                | 6                | 0              | 0.773826                | 2.136984  | -0.434177 |
| 3                | 6                | 0              | 1.409406                | 3.406966  | -0.689461 |
| 4                | 6                | 0              | 1.909737                | 3.854741  | 0.558314  |
| 5                | 7                | 0              | 1.590913                | 2.934521  | 1.598771  |
| 6                | 8                | 0              | 0.227597                | 1.284247  | -1.131818 |
| 7                | 6                | 0              | 1.617030                | 4.148655  | -1.854860 |
| 8                | 6                | 0              | 2.617992                | 5.035713  | 0.665337  |
| 9                | 8                | 0              | 0.408480                | 0.911592  | 1.626611  |
| 10               | 6                | 0              | 1.945943                | 3.099829  | 3.001853  |
| 11               | 1                | 0              | 1.439033                | 3.974901  | 3.419241  |
| 12               | 1                | 0              | 1.630525                | 2.203995  | 3.537701  |
| 13               | 1                | 0              | 3.027986                | 3.223108  | 3.100750  |
| 14               | 6                | 0              | 2.330545                | 5.343585  | -1.757278 |
| 15               | 6                | 0              | 2.818991                | 5.771378  | -0.516514 |
| 16               | 1                | 0              | 2.509610                | 5.943815  | -2.643095 |
| 17               | 1                | 0              | 3.373255                | 6.703498  | -0.458502 |
| 18               | 1                | 0              | 3.005669                | 5.389283  | 1.614212  |
| 19               | 8                | 0              | -2.191159               | 0.091909  | 0.016396  |
| 20               | 12               | 0              | -0.250868               | -0.549931 | 0.098097  |
| 21               | 8                | 0              | -0.846921               | -1.757756 | 1.586987  |
| 22               | 8                | 0              | -0.339911               | -1.807583 | -1.485810 |
| 23               | 8                | 0              | 1.759270                | -0.961655 | 0.035848  |
| 24               | 7                | 0              | -4.337613               | 0.451055  | 0.631666  |
| 25               | 1                | 0              | -5.123975               | 0.193955  | 1.217857  |
| 26               | 7                | 0              | -2.079382               | -2.378445 | 1.579818  |
| 27               | 7                | 0              | 3.801309                | -1.654326 | -0.632886 |
| 28               | 1                | 0              | 4.346387                | -2.225257 | -1.270243 |
| 29               | 7                | 0              | 0.397677                | -2.976158 | -1.535282 |
| 30               | 6                | 0              | -4.483642               | 1.566158  | -0.226024 |
| 31               | 6                | 0              | -4.826649               | 1.368599  | -1.589234 |
| 32               | 6                | 0              | -4.910086               | 2.486725  | -2.438673 |
| 33               | 1                | 0              | -5.155949               | 2.368757  | -3.485717 |
| 34               | 6                | 0              | -4.671908               | 3.769016  | -1.954149 |
| 35               | 1                | 0              | -4.739772               | 4.618447  | -2.621736 |
| 36               | 6                | 0              | -4.339073               | 3.964098  | -0.617450 |

---

|    |   |   |           |           |           |
|----|---|---|-----------|-----------|-----------|
| 37 | 1 | 0 | -4.149737 | 4.972741  | -0.274933 |
| 38 | 6 | 0 | -4.236466 | 2.874137  | 0.265816  |
| 39 | 6 | 0 | -3.830660 | 3.117292  | 1.716087  |
| 40 | 1 | 0 | -3.807066 | 2.162579  | 2.281230  |
| 41 | 6 | 0 | -2.416931 | 3.704791  | 1.797472  |
| 42 | 1 | 0 | -1.704506 | 3.052195  | 1.251546  |
| 43 | 1 | 0 | -2.085597 | 3.764727  | 2.856358  |
| 44 | 1 | 0 | -2.374140 | 4.723798  | 1.357990  |
| 45 | 6 | 0 | -4.842612 | 4.016606  | 2.435417  |
| 46 | 1 | 0 | -4.582586 | 4.096300  | 3.512864  |
| 47 | 1 | 0 | -5.861871 | 3.580872  | 2.360281  |
| 48 | 1 | 0 | -4.856945 | 5.039819  | 2.004141  |
| 49 | 6 | 0 | -5.081480 | -0.026100 | -2.153355 |
| 50 | 1 | 0 | -5.030194 | -0.789886 | -1.349622 |
| 51 | 6 | 0 | -6.487479 | -0.138778 | -2.755220 |
| 52 | 1 | 0 | -7.249927 | 0.154328  | -2.001879 |
| 53 | 1 | 0 | -6.689932 | -1.188645 | -3.057484 |
| 54 | 1 | 0 | -6.601554 | 0.506880  | -3.651405 |
| 55 | 6 | 0 | -4.009622 | -0.403781 | -3.181853 |
| 56 | 1 | 0 | -4.060747 | 0.249784  | -4.078441 |
| 57 | 1 | 0 | -4.147236 | -1.457355 | -3.506333 |
| 58 | 1 | 0 | -2.999927 | -0.308306 | -2.729432 |
| 59 | 6 | 0 | -3.174891 | -0.216259 | 0.715010  |
| 60 | 6 | 0 | -3.199580 | -1.350872 | 1.736691  |
| 61 | 1 | 0 | -4.136119 | -1.903680 | 1.604057  |
| 62 | 6 | 0 | -3.064432 | -0.920576 | 3.198087  |
| 63 | 1 | 0 | -3.947588 | -0.371900 | 3.533853  |
| 64 | 1 | 0 | -2.187309 | -0.278351 | 3.313397  |
| 65 | 6 | 0 | -2.887974 | -2.268322 | 3.927499  |
| 66 | 1 | 0 | -3.875598 | -2.644644 | 4.209415  |
| 67 | 6 | 0 | -1.926922 | -2.248642 | 5.137509  |
| 68 | 1 | 0 | -1.918737 | -1.274943 | 5.639464  |
| 69 | 1 | 0 | -2.252370 | -2.992703 | 5.874403  |
| 70 | 6 | 0 | -0.556399 | -2.645339 | 4.561245  |
| 71 | 1 | 0 | 0.123794  | -3.038001 | 5.324478  |
| 72 | 1 | 0 | -0.077228 | -1.781569 | 4.090520  |
| 73 | 6 | 0 | -0.903151 | -3.691340 | 3.487238  |
| 74 | 1 | 0 | -0.117920 | -3.826459 | 2.742252  |
| 75 | 1 | 0 | -1.090287 | -4.664125 | 3.959260  |
| 76 | 6 | 0 | -2.236214 | -3.226385 | 2.882472  |
| 77 | 1 | 0 | -2.889914 | -4.054186 | 2.604968  |
| 78 | 6 | 0 | -2.301747 | -3.190280 | 0.316071  |
| 79 | 1 | 0 | -3.272710 | -3.677247 | 0.439358  |
| 80 | 1 | 0 | -2.364031 | -2.470158 | -0.496486 |

|     |   |   |           |           |           |
|-----|---|---|-----------|-----------|-----------|
| 81  | 6 | 0 | -1.247691 | -4.254526 | 0.004975  |
| 82  | 1 | 0 | -1.652100 | -4.833227 | -0.833627 |
| 83  | 1 | 0 | -1.177257 | -4.962036 | 0.839054  |
| 84  | 6 | 0 | 0.192721  | -3.836380 | -0.298805 |
| 85  | 1 | 0 | 0.609334  | -3.274219 | 0.533773  |
| 86  | 1 | 0 | 0.794111  | -4.735857 | -0.458598 |
| 87  | 6 | 0 | 0.067969  | -3.744530 | -2.855216 |
| 88  | 1 | 0 | 0.194669  | -4.797815 | -2.604407 |
| 89  | 6 | 0 | -1.318086 | -3.433299 | -3.438896 |
| 90  | 1 | 0 | -2.054312 | -3.160733 | -2.682211 |
| 91  | 1 | 0 | -1.666331 | -4.350326 | -3.931006 |
| 92  | 6 | 0 | -1.079714 | -2.335477 | -4.490118 |
| 93  | 1 | 0 | -1.028230 | -1.360148 | -3.996807 |
| 94  | 1 | 0 | -1.875009 | -2.294603 | -5.241843 |
| 95  | 6 | 0 | 0.287579  | -2.703321 | -5.092550 |
| 96  | 1 | 0 | 0.785179  | -1.859161 | -5.582229 |
| 97  | 1 | 0 | 0.165105  | -3.492214 | -5.844309 |
| 98  | 6 | 0 | 1.110302  | -3.248408 | -3.903338 |
| 99  | 1 | 0 | 1.751826  | -4.079892 | -4.209254 |
| 100 | 6 | 0 | 1.975323  | -2.207880 | -3.165741 |
| 101 | 1 | 0 | 1.565091  | -1.198608 | -3.257774 |
| 102 | 1 | 0 | 3.007895  | -2.201279 | -3.521363 |
| 103 | 6 | 0 | 1.889783  | -2.672956 | -1.709716 |
| 104 | 1 | 0 | 2.414790  | -3.628169 | -1.601509 |
| 105 | 6 | 0 | 2.455496  | -1.692400 | -0.689974 |
| 106 | 6 | 0 | 4.451241  | -0.590913 | 0.041189  |
| 107 | 6 | 0 | 4.531782  | -0.594173 | 1.460523  |
| 108 | 6 | 0 | 5.040440  | 0.541268  | 2.116464  |
| 109 | 1 | 0 | 5.103235  | 0.574745  | 3.196073  |
| 110 | 6 | 0 | 5.473792  | 1.647480  | 1.393740  |
| 111 | 1 | 0 | 5.856308  | 2.515496  | 1.915306  |
| 112 | 6 | 0 | 5.427696  | 1.640166  | 0.003837  |
| 113 | 1 | 0 | 5.776354  | 2.516286  | -0.526520 |
| 114 | 6 | 0 | 4.928420  | 0.526486  | -0.696019 |
| 115 | 6 | 0 | 4.890544  | 0.557925  | -2.221877 |
| 116 | 1 | 0 | 4.512129  | -0.400969 | -2.627498 |
| 117 | 6 | 0 | 6.294658  | 0.742917  | -2.810245 |
| 118 | 1 | 0 | 6.259713  | 0.650941  | -3.917046 |
| 119 | 1 | 0 | 6.978052  | -0.042926 | -2.422673 |
| 120 | 1 | 0 | 6.714538  | 1.739698  | -2.558809 |
| 121 | 6 | 0 | 3.936069  | 1.642186  | -2.729439 |
| 122 | 1 | 0 | 2.915518  | 1.453480  | -2.337944 |
| 123 | 1 | 0 | 3.881911  | 1.617642  | -3.838921 |
| 124 | 1 | 0 | 4.267843  | 2.654398  | -2.416324 |

|     |   |   |          |           |           |
|-----|---|---|----------|-----------|-----------|
| 125 | 6 | 0 | 4.100148 | -1.805192 | 2.283298  |
| 126 | 1 | 0 | 3.739419 | -2.619020 | 1.620250  |
| 127 | 6 | 0 | 5.282906 | -2.388127 | 3.065873  |
| 128 | 1 | 0 | 6.118067 | -2.628160 | 2.373204  |
| 129 | 1 | 0 | 4.978145 | -3.327766 | 3.574655  |
| 130 | 1 | 0 | 5.649989 | -1.678138 | 3.837009  |
| 131 | 6 | 0 | 2.941143 | -1.458506 | 3.226422  |
| 132 | 1 | 0 | 3.251482 | -0.724728 | 3.999778  |
| 133 | 1 | 0 | 2.581841 | -2.376209 | 3.739204  |
| 134 | 1 | 0 | 2.092826 | -1.031670 | 2.653754  |
| 135 | 1 | 0 | 1.233118 | 3.793819  | -2.806361 |

---

### L3a-Ca(II)-TS-si-1

Zero-point correction= 1.28694 a.u.

Thermal correction to Gibbs Free Energy= 1.17025 a.u.

Sum of electronic and zero-point Energies= -7194.58814 a.u.

Sum of electronic and thermal Free Energies= -7194.70483a.u.

The number of imaginary frequencies 1

Standard orientation

---

| Center<br>Number | Atomic<br>Number | Atomic<br>Type | Coordinates (Angstroms) |           |           |
|------------------|------------------|----------------|-------------------------|-----------|-----------|
|                  |                  |                | X                       | Y         | Z         |
| 1                | 6                | 0              | -1.689490               | -1.049431 | 1.442790  |
| 2                | 6                | 0              | -2.802911               | -1.515168 | 0.453230  |
| 3                | 6                | 0              | -3.976719               | -1.717069 | 1.421426  |
| 4                | 6                | 0              | -3.523720               | -1.497680 | 2.731906  |
| 5                | 7                | 0              | -2.158098               | -1.133865 | 2.712604  |
| 6                | 8                | 0              | -2.997000               | -0.717247 | -0.581978 |
| 7                | 8                | 0              | -0.546430               | -0.690186 | 1.138276  |
| 8                | 6                | 0              | -1.380440               | -0.817435 | 3.899413  |
| 9                | 6                | 0              | -5.326686               | -1.957076 | 1.239166  |
| 10               | 6                | 0              | -4.348882               | -1.576923 | 3.845839  |
| 11               | 6                | 0              | -5.701456               | -1.864577 | 3.623100  |
| 12               | 6                | 0              | -6.198802               | -2.041878 | 2.332814  |
| 13               | 1                | 0              | -1.247439               | -1.711971 | 4.517257  |
| 14               | 1                | 0              | -0.407788               | -0.449313 | 3.573875  |
| 15               | 1                | 0              | -1.883899               | -0.046251 | 4.490104  |
| 16               | 1                | 0              | -3.970233               | -1.408414 | 4.848306  |
| 17               | 1                | 0              | -6.380545               | -1.933344 | 4.468014  |
| 18               | 1                | 0              | -7.253847               | -2.234472 | 2.172233  |
| 19               | 6                | 0              | -2.157055               | -3.025789 | 0.011345  |
| 20               | 6                | 0              | -2.897404               | -3.510505 | -1.141533 |

|    |   |   |           |           |           |
|----|---|---|-----------|-----------|-----------|
| 21 | 8 | 0 | -3.714978 | -4.518846 | -0.915216 |
| 22 | 6 | 0 | -4.514046 | -5.059997 | -1.990775 |
| 23 | 6 | 0 | -2.871223 | -2.691017 | -2.305009 |
| 24 | 1 | 0 | -1.138114 | -2.765481 | -0.279823 |
| 25 | 1 | 0 | -2.171396 | -3.709319 | 0.861250  |
| 26 | 1 | 0 | -4.942115 | -5.979444 | -1.591378 |
| 27 | 1 | 0 | -5.310977 | -4.363082 | -2.255567 |
| 28 | 1 | 0 | -3.885843 | -5.278265 | -2.857900 |
| 29 | 1 | 0 | -1.868782 | -2.437188 | -2.659345 |
| 30 | 1 | 0 | -3.550959 | -2.935927 | -3.118789 |
| 31 | 1 | 0 | -3.120640 | -1.633326 | -1.709407 |
| 32 | 8 | 0 | 1.768840  | 1.551732  | 1.964749  |
| 33 | 8 | 0 | 3.127355  | -0.383291 | 0.434358  |
| 34 | 8 | 0 | 1.900152  | 2.456424  | -1.231495 |
| 35 | 7 | 0 | 4.586333  | -1.551621 | 1.721773  |
| 36 | 1 | 0 | 5.116464  | -1.609433 | 2.583486  |
| 37 | 7 | 0 | 3.069054  | 1.851590  | 2.296052  |
| 38 | 7 | 0 | -2.152935 | 3.818677  | -0.909956 |
| 39 | 1 | 0 | -2.292917 | 4.629712  | -1.502291 |
| 40 | 7 | 0 | 1.600722  | 3.783499  | -1.065761 |
| 41 | 6 | 0 | 4.601649  | -2.673444 | 0.861378  |
| 42 | 6 | 0 | 5.528939  | -2.728782 | -0.210915 |
| 43 | 6 | 0 | 5.507556  | -3.840861 | -1.072668 |
| 44 | 1 | 0 | 6.193554  | -3.907859 | -1.906598 |
| 45 | 6 | 0 | 4.593741  | -4.872862 | -0.881769 |
| 46 | 1 | 0 | 4.585720  | -5.717653 | -1.558382 |
| 47 | 6 | 0 | 3.679999  | -4.816727 | 0.166096  |
| 48 | 1 | 0 | 2.971788  | -5.627210 | 0.276934  |
| 49 | 6 | 0 | 3.668674  | -3.725726 | 1.054116  |
| 50 | 6 | 0 | 2.632971  | -3.677280 | 2.172752  |
| 51 | 1 | 0 | 2.779324  | -2.777098 | 2.804365  |
| 52 | 6 | 0 | 1.215895  | -3.577103 | 1.597538  |
| 53 | 1 | 0 | 1.157815  | -2.721025 | 0.893139  |
| 54 | 1 | 0 | 0.483050  | -3.405091 | 2.414968  |
| 55 | 1 | 0 | 0.931109  | -4.504858 | 1.057472  |
| 56 | 6 | 0 | 2.764388  | -4.881504 | 3.112192  |
| 57 | 1 | 0 | 2.077743  | -4.765678 | 3.978189  |
| 58 | 1 | 0 | 3.802197  | -4.948516 | 3.503390  |
| 59 | 1 | 0 | 2.513253  | -5.831698 | 2.595507  |
| 60 | 6 | 0 | 6.516958  | -1.595567 | -0.467458 |
| 61 | 1 | 0 | 6.436130  | -0.818555 | 0.321164  |
| 62 | 6 | 0 | 7.965947  | -2.095634 | -0.425861 |
| 63 | 1 | 0 | 8.162217  | -2.618332 | 0.534941  |
| 64 | 1 | 0 | 8.667450  | -1.236969 | -0.498646 |

|     |   |   |          |           |           |
|-----|---|---|----------|-----------|-----------|
| 65  | 1 | 0 | 8.181350 | -2.791849 | -1.263520 |
| 66  | 6 | 0 | 6.211354 | -0.897001 | -1.797365 |
| 67  | 1 | 0 | 6.348825 | -1.585896 | -2.657745 |
| 68  | 1 | 0 | 6.885409 | -0.024664 | -1.935069 |
| 69  | 1 | 0 | 5.164194 | -0.523982 | -1.800569 |
| 70  | 6 | 0 | 3.800181 | -0.483145 | 1.469274  |
| 71  | 6 | 0 | 3.859194 | 0.570589  | 2.577030  |
| 72  | 1 | 0 | 4.906947 | 0.870440  | 2.693881  |
| 73  | 6 | 0 | 3.309284 | 0.129371  | 3.934063  |
| 74  | 1 | 0 | 3.928274 | -0.646479 | 4.391668  |
| 75  | 1 | 0 | 2.295805 | -0.260965 | 3.807881  |
| 76  | 6 | 0 | 3.321346 | 1.440470  | 4.741299  |
| 77  | 1 | 0 | 4.297565 | 1.543161  | 5.224595  |
| 78  | 6 | 0 | 2.169588 | 1.608697  | 5.755437  |
| 79  | 1 | 0 | 1.847403 | 0.649433  | 6.176119  |
| 80  | 1 | 0 | 2.505663 | 2.234477  | 6.591177  |
| 81  | 6 | 0 | 1.062269 | 2.331926  | 4.970868  |
| 82  | 1 | 0 | 0.345525 | 2.842112  | 5.623469  |
| 83  | 1 | 0 | 0.509962 | 1.620362  | 4.349622  |
| 84  | 6 | 0 | 1.834796 | 3.306093  | 4.064374  |
| 85  | 1 | 0 | 1.258071 | 3.630395  | 3.198571  |
| 86  | 1 | 0 | 2.124001 | 4.197660  | 4.634978  |
| 87  | 6 | 0 | 3.129015 | 2.570743  | 3.685680  |
| 88  | 1 | 0 | 3.991691 | 3.235766  | 3.629239  |
| 89  | 6 | 0 | 3.761836 | 2.660264  | 1.209889  |
| 90  | 1 | 0 | 4.803941 | 2.763479  | 1.526800  |
| 91  | 1 | 0 | 3.717331 | 2.049916  | 0.311102  |
| 92  | 6 | 0 | 3.196033 | 4.058942  | 0.946451  |
| 93  | 1 | 0 | 3.919558 | 4.553575  | 0.288583  |
| 94  | 1 | 0 | 3.208919 | 4.640782  | 1.875098  |
| 95  | 6 | 0 | 1.785274 | 4.216129  | 0.375375  |
| 96  | 1 | 0 | 1.076310 | 3.624499  | 0.950588  |
| 97  | 1 | 0 | 1.500740 | 5.271592  | 0.418526  |
| 98  | 6 | 0 | 2.426546 | 4.640106  | -2.076534 |
| 99  | 1 | 0 | 2.566526 | 5.608042  | -1.591911 |
| 100 | 6 | 0 | 3.748690 | 3.986740  | -2.505713 |
| 101 | 1 | 0 | 4.166381 | 3.328773  | -1.743071 |
| 102 | 1 | 0 | 4.465532 | 4.798454  | -2.685445 |
| 103 | 6 | 0 | 3.435801 | 3.257321  | -3.824272 |
| 104 | 1 | 0 | 2.994787 | 2.280813  | -3.604962 |
| 105 | 1 | 0 | 4.330106 | 3.097767  | -4.436790 |
| 106 | 6 | 0 | 2.404349 | 4.169876  | -4.510635 |
| 107 | 1 | 0 | 1.800132 | 3.647524  | -5.260552 |
| 108 | 1 | 0 | 2.915307 | 4.996345  | -5.020181 |

|     |    |   |           |           |           |
|-----|----|---|-----------|-----------|-----------|
| 109 | 6  | 0 | 1.541630  | 4.731812  | -3.359308 |
| 110 | 1  | 0 | 1.265857  | 5.774876  | -3.542701 |
| 111 | 6  | 0 | 0.258291  | 3.938974  | -3.031374 |
| 112 | 1  | 0 | 0.350006  | 2.880486  | -3.288423 |
| 113 | 1  | 0 | -0.623071 | 4.348426  | -3.530828 |
| 114 | 6  | 0 | 0.166491  | 4.094745  | -1.513806 |
| 115 | 1  | 0 | -0.000553 | 5.150367  | -1.272815 |
| 116 | 6  | 0 | -0.916798 | 3.275900  | -0.813953 |
| 117 | 6  | 0 | -3.294042 | 3.076815  | -0.518612 |
| 118 | 6  | 0 | -3.645244 | 2.987157  | 0.856188  |
| 119 | 6  | 0 | -4.757226 | 2.209174  | 1.226024  |
| 120 | 1  | 0 | -5.047106 | 2.114819  | 2.264427  |
| 121 | 6  | 0 | -5.512352 | 1.544631  | 0.266699  |
| 122 | 1  | 0 | -6.367409 | 0.954695  | 0.569550  |
| 123 | 6  | 0 | -5.170189 | 1.629059  | -1.078785 |
| 124 | 1  | 0 | -5.770016 | 1.085949  | -1.796842 |
| 125 | 6  | 0 | -4.063054 | 2.390285  | -1.496373 |
| 126 | 6  | 0 | -3.695227 | 2.425370  | -2.977444 |
| 127 | 1  | 0 | -2.832475 | 3.098204  | -3.153953 |
| 128 | 6  | 0 | -4.847642 | 2.977900  | -3.825557 |
| 129 | 1  | 0 | -4.515573 | 3.114743  | -4.877040 |
| 130 | 1  | 0 | -5.169142 | 3.967634  | -3.435969 |
| 131 | 1  | 0 | -5.720289 | 2.291405  | -3.825000 |
| 132 | 6  | 0 | -3.263306 | 1.039568  | -3.471634 |
| 133 | 1  | 0 | -2.388795 | 0.682680  | -2.886982 |
| 134 | 1  | 0 | -2.955983 | 1.092551  | -4.538037 |
| 135 | 1  | 0 | -4.087670 | 0.300937  | -3.381408 |
| 136 | 6  | 0 | -2.856866 | 3.724462  | 1.935556  |
| 137 | 1  | 0 | -2.033101 | 4.316651  | 1.485759  |
| 138 | 6  | 0 | -3.743749 | 4.730497  | 2.678841  |
| 139 | 1  | 0 | -4.221592 | 5.425350  | 1.955225  |
| 140 | 1  | 0 | -3.129408 | 5.334433  | 3.380586  |
| 141 | 1  | 0 | -4.537896 | 4.219830  | 3.263451  |
| 142 | 6  | 0 | -2.205274 | 2.740930  | 2.915811  |
| 143 | 1  | 0 | -2.969500 | 2.162351  | 3.475764  |
| 144 | 1  | 0 | -1.579935 | 3.293805  | 3.648470  |
| 145 | 1  | 0 | -1.548860 | 2.032190  | 2.369224  |
| 146 | 8  | 0 | -0.705404 | 2.227813  | -0.193803 |
| 147 | 20 | 0 | 1.009031  | 0.605623  | -0.093975 |
| 148 | 8  | 0 | 0.553036  | -0.462293 | -2.160569 |
| 149 | 16 | 0 | 0.983549  | -1.201377 | -3.391653 |
| 150 | 8  | 0 | -0.145329 | -1.736300 | -4.175338 |
| 151 | 8  | 0 | 2.064840  | -0.545345 | -4.146964 |
| 152 | 6  | 0 | 1.786144  | -2.704494 | -2.650308 |



|     |    |   |           |           |           |
|-----|----|---|-----------|-----------|-----------|
| 153 | 9  | 0 | 0.904701  | -3.400448 | -1.907099 |
| 154 | 9  | 0 | 2.263377  | -3.517057 | -3.602396 |
| 155 | 9  | 0 | 2.802196  | -2.335708 | -1.856098 |
| 156 | 35 | 0 | -6.070923 | -2.126179 | -0.519762 |

---

### L3a-Ca(II)-TS-re-1

Zero-point correction= 1.28559 a.u.

Thermal correction to Gibbs Free Energy= 1.17449 a.u.

Sum of electronic and zero-point Energies= -7194.59210 a.u.

Sum of electronic and thermal Free Energies= -7194.70320 a.u.

The number of imaginary frequencies 1

Standard orientation

---

| Center<br>Number | Atomic<br>Number | Atomic<br>Type | Coordinates (Angstroms) |           |           |
|------------------|------------------|----------------|-------------------------|-----------|-----------|
|                  |                  |                | X                       | Y         | Z         |
| 1                | 6                | 0              | -3.608770               | -0.347138 | -0.565505 |
| 2                | 6                | 0              | -3.996808               | -0.808363 | -1.889909 |
| 3                | 8                | 0              | -5.286124               | -0.755784 | -2.154831 |
| 4                | 6                | 0              | -5.780142               | -1.212772 | -3.433887 |
| 5                | 6                | 0              | -3.011838               | -1.505792 | -2.639266 |
| 6                | 1                | 0              | -2.690219               | 0.240650  | -0.616259 |
| 7                | 1                | 0              | -4.398191               | 0.194644  | -0.044493 |
| 8                | 1                | 0              | -6.817652               | -0.880858 | -3.472202 |
| 9                | 1                | 0              | -5.735901               | -2.302084 | -3.485507 |
| 10               | 1                | 0              | -5.205500               | -0.762246 | -4.246744 |
| 11               | 1                | 0              | -2.058896               | -0.985205 | -2.749291 |
| 12               | 1                | 0              | -3.321312               | -2.004038 | -3.555520 |
| 13               | 1                | 0              | -2.667198               | -2.258632 | -1.710756 |
| 14               | 6                | 0              | -2.466990               | -0.965015 | 1.543177  |
| 15               | 6                | 0              | -3.143428               | -1.697869 | 0.344617  |
| 16               | 6                | 0              | -4.382471               | -2.288986 | 1.028831  |
| 17               | 6                | 0              | -4.422981               | -1.829214 | 2.354741  |
| 18               | 7                | 0              | -3.287998               | -1.031721 | 2.623519  |
| 19               | 8                | 0              | -2.344360               | -2.524789 | -0.315913 |
| 20               | 8                | 0              | -1.375249               | -0.388706 | 1.514061  |
| 21               | 6                | 0              | -2.988104               | -0.480302 | 3.934437  |
| 22               | 6                | 0              | -5.357743               | -3.184303 | 0.627407  |
| 23               | 6                | 0              | -5.427481               | -2.176040 | 3.248951  |
| 24               | 1                | 0              | -3.800117               | 0.175058  | 4.262654  |
| 25               | 1                | 0              | -2.062981               | 0.089129  | 3.861366  |
| 26               | 1                | 0              | -2.860054               | -1.285406 | 4.665825  |
| 27               | 6                | 0              | -6.423987               | -3.046752 | 2.789498  |

|    |   |   |           |           |           |
|----|---|---|-----------|-----------|-----------|
| 28 | 6 | 0 | -6.390198 | -3.564369 | 1.495269  |
| 29 | 1 | 0 | -5.438084 | -1.802084 | 4.267084  |
| 30 | 1 | 0 | -7.227268 | -3.342104 | 3.458246  |
| 31 | 1 | 0 | -7.150318 | -4.262781 | 1.162689  |
| 32 | 8 | 0 | 1.489204  | 0.519031  | 2.648895  |
| 33 | 8 | 0 | 2.575131  | -1.132862 | 0.615381  |
| 34 | 8 | 0 | 2.203832  | 2.077601  | -0.138541 |
| 35 | 7 | 0 | 4.220114  | -2.526370 | 1.324401  |
| 36 | 1 | 0 | 4.900185  | -2.738593 | 2.045316  |
| 37 | 7 | 0 | 2.776741  | 0.428010  | 3.112033  |
| 38 | 7 | 0 | -1.407099 | 4.315593  | -0.410478 |
| 39 | 1 | 0 | -1.201709 | 5.194942  | -0.871677 |
| 40 | 7 | 0 | 2.171474  | 3.378563  | 0.296132  |
| 41 | 6 | 0 | 4.434458  | -3.067197 | 0.035126  |
| 42 | 6 | 0 | 5.483217  | -2.560606 | -0.777385 |
| 43 | 6 | 0 | 5.633350  | -3.060750 | -2.083676 |
| 44 | 1 | 0 | 6.410028  | -2.682283 | -2.734938 |
| 45 | 6 | 0 | 4.781256  | -4.045862 | -2.572164 |
| 46 | 1 | 0 | 4.909513  | -4.417196 | -3.580818 |
| 47 | 6 | 0 | 3.760995  | -4.551712 | -1.772904 |
| 48 | 1 | 0 | 3.111566  | -5.311930 | -2.186111 |
| 49 | 6 | 0 | 3.567547  | -4.074964 | -0.463680 |
| 50 | 6 | 0 | 2.430688  | -4.640977 | 0.382456  |
| 51 | 1 | 0 | 2.440712  | -4.196472 | 1.399344  |
| 52 | 6 | 0 | 1.066430  | -4.300754 | -0.229698 |
| 53 | 1 | 0 | 0.966028  | -3.201727 | -0.355137 |
| 54 | 1 | 0 | 0.250723  | -4.643163 | 0.442565  |
| 55 | 1 | 0 | 0.932852  | -4.788424 | -1.218501 |
| 56 | 6 | 0 | 2.582066  | -6.154174 | 0.580309  |
| 57 | 1 | 0 | 1.814859  | -6.523616 | 1.294302  |
| 58 | 1 | 0 | 3.583150  | -6.386330 | 1.002729  |
| 59 | 1 | 0 | 2.459783  | -6.704691 | -0.376276 |
| 60 | 6 | 0 | 6.421581  | -1.464206 | -0.279835 |
| 61 | 1 | 0 | 6.205997  | -1.211639 | 0.778654  |
| 62 | 6 | 0 | 7.885410  | -1.919682 | -0.319875 |
| 63 | 1 | 0 | 8.004564  | -2.872165 | 0.239962  |
| 64 | 1 | 0 | 8.534607  | -1.156431 | 0.160401  |
| 65 | 1 | 0 | 8.238226  | -2.069162 | -1.361954 |
| 66 | 6 | 0 | 6.225447  | -0.169979 | -1.076815 |
| 67 | 1 | 0 | 6.478728  | -0.308842 | -2.149147 |
| 68 | 1 | 0 | 6.870076  | 0.635404  | -0.664380 |
| 69 | 1 | 0 | 5.169990  | 0.162553  | -0.996167 |
| 70 | 6 | 0 | 3.325903  | -1.530090 | 1.515591  |
| 71 | 6 | 0 | 3.331448  | -0.992079 | 2.946836  |

|     |   |   |           |           |           |
|-----|---|---|-----------|-----------|-----------|
| 72  | 1 | 0 | 4.373500  | -0.940147 | 3.279381  |
| 73  | 6 | 0 | 2.523068  | -1.780521 | 3.974573  |
| 74  | 1 | 0 | 2.946341  | -2.774067 | 4.140044  |
| 75  | 1 | 0 | 1.492392  | -1.888775 | 3.626286  |
| 76  | 6 | 0 | 2.622221  | -0.874339 | 5.221163  |
| 77  | 1 | 0 | 3.512584  | -1.163225 | 5.787417  |
| 78  | 6 | 0 | 1.372386  | -0.831654 | 6.128519  |
| 79  | 1 | 0 | 0.809875  | -1.771599 | 6.098819  |
| 80  | 1 | 0 | 1.680909  | -0.669344 | 7.168522  |
| 81  | 6 | 0 | 0.560670  | 0.375309  | 5.626376  |
| 82  | 1 | 0 | -0.134656 | 0.761522  | 6.379780  |
| 83  | 1 | 0 | -0.013026 | 0.099245  | 4.737992  |
| 84  | 6 | 0 | 1.633317  | 1.402278  | 5.227328  |
| 85  | 1 | 0 | 1.266295  | 2.150300  | 4.523654  |
| 86  | 1 | 0 | 2.005284  | 1.925092  | 6.117658  |
| 87  | 6 | 0 | 2.797721  | 0.574466  | 4.666596  |
| 88  | 1 | 0 | 3.774118  | 0.998039  | 4.905912  |
| 89  | 6 | 0 | 3.698805  | 1.407116  | 2.410017  |
| 90  | 1 | 0 | 4.696566  | 1.239658  | 2.827091  |
| 91  | 1 | 0 | 3.685389  | 1.117047  | 1.362024  |
| 92  | 6 | 0 | 3.347091  | 2.891018  | 2.545952  |
| 93  | 1 | 0 | 4.242918  | 3.437387  | 2.229738  |
| 94  | 1 | 0 | 3.211857  | 3.149721  | 3.601799  |
| 95  | 6 | 0 | 2.125380  | 3.452850  | 1.813374  |
| 96  | 1 | 0 | 1.221939  | 2.921017  | 2.104782  |
| 97  | 1 | 0 | 2.022351  | 4.511574  | 2.072203  |
| 98  | 6 | 0 | 3.368839  | 4.187284  | -0.307030 |
| 99  | 1 | 0 | 3.586724  | 4.965638  | 0.426176  |
| 100 | 6 | 0 | 4.595133  | 3.331628  | -0.653393 |
| 101 | 1 | 0 | 4.707183  | 2.457361  | -0.013301 |
| 102 | 1 | 0 | 5.478575  | 3.967498  | -0.508123 |
| 103 | 6 | 0 | 4.443199  | 2.980574  | -2.143495 |
| 104 | 1 | 0 | 3.770325  | 2.126339  | -2.253942 |
| 105 | 1 | 0 | 5.400284  | 2.724210  | -2.611720 |
| 106 | 6 | 0 | 3.807083  | 4.244130  | -2.748402 |
| 107 | 1 | 0 | 3.288201  | 4.051400  | -3.693499 |
| 108 | 1 | 0 | 4.580953  | 4.996180  | -2.946730 |
| 109 | 6 | 0 | 2.845828  | 4.767561  | -1.656662 |
| 110 | 1 | 0 | 2.851406  | 5.860889  | -1.613764 |
| 111 | 6 | 0 | 1.386091  | 4.285734  | -1.769356 |
| 112 | 1 | 0 | 1.311610  | 3.322848  | -2.281512 |
| 113 | 1 | 0 | 0.749934  | 5.010319  | -2.283839 |
| 114 | 6 | 0 | 0.979187  | 4.127785  | -0.303421 |
| 115 | 1 | 0 | 0.965428  | 5.112438  | 0.175214  |

|     |    |   |           |           |           |
|-----|----|---|-----------|-----------|-----------|
| 116 | 6  | 0 | -0.389426 | 3.487601  | -0.076880 |
| 117 | 6  | 0 | -2.748087 | 3.863050  | -0.416996 |
| 118 | 6  | 0 | -3.473956 | 3.780504  | 0.801453  |
| 119 | 6  | 0 | -4.789737 | 3.283717  | 0.777945  |
| 120 | 1  | 0 | -5.364265 | 3.196070  | 1.690588  |
| 121 | 6  | 0 | -5.384701 | 2.897345  | -0.418301 |
| 122 | 1  | 0 | -6.398215 | 2.517155  | -0.417710 |
| 123 | 6  | 0 | -4.680136 | 2.987777  | -1.614037 |
| 124 | 1  | 0 | -5.169493 | 2.668983  | -2.524926 |
| 125 | 6  | 0 | -3.358110 | 3.468368  | -1.637589 |
| 126 | 6  | 0 | -2.605086 | 3.520838  | -2.963414 |
| 127 | 1  | 0 | -1.582359 | 3.923480  | -2.819915 |
| 128 | 6  | 0 | -3.299304 | 4.454688  | -3.961357 |
| 129 | 1  | 0 | -2.681646 | 4.558375  | -4.879290 |
| 130 | 1  | 0 | -3.423523 | 5.464746  | -3.515382 |
| 131 | 1  | 0 | -4.297534 | 4.067009  | -4.255205 |
| 132 | 6  | 0 | -2.431286 | 2.117094  | -3.551767 |
| 133 | 1  | 0 | -1.922055 | 1.465962  | -2.812418 |
| 134 | 1  | 0 | -1.802026 | 2.160141  | -4.466205 |
| 135 | 1  | 0 | -3.408430 | 1.663734  | -3.820933 |
| 136 | 6  | 0 | -2.863285 | 4.224047  | 2.127900  |
| 137 | 1  | 0 | -1.842442 | 4.631361  | 1.974535  |
| 138 | 6  | 0 | -3.677612 | 5.355865  | 2.766260  |
| 139 | 1  | 0 | -3.785462 | 6.199133  | 2.050807  |
| 140 | 1  | 0 | -3.156254 | 5.737458  | 3.670304  |
| 141 | 1  | 0 | -4.688607 | 5.010457  | 3.068748  |
| 142 | 6  | 0 | -2.721861 | 3.039762  | 3.089980  |
| 143 | 1  | 0 | -3.714603 | 2.637768  | 3.382587  |
| 144 | 1  | 0 | -2.184513 | 3.354346  | 4.010194  |
| 145 | 1  | 0 | -2.132703 | 2.231064  | 2.610117  |
| 146 | 8  | 0 | -0.577720 | 2.353767  | 0.382055  |
| 147 | 20 | 0 | 0.693080  | 0.322349  | 0.428645  |
| 148 | 8  | 0 | 0.373863  | -0.015031 | -1.905961 |
| 149 | 16 | 0 | 0.767499  | -0.000636 | -3.352721 |
| 150 | 8  | 0 | -0.190332 | -0.702870 | -4.225780 |
| 151 | 8  | 0 | 1.255674  | 1.305209  | -3.833939 |
| 152 | 6  | 0 | 2.269383  | -1.093639 | -3.348846 |
| 153 | 9  | 0 | 1.947494  | -2.321680 | -2.917515 |
| 154 | 9  | 0 | 2.785291  | -1.199614 | -4.581707 |
| 155 | 9  | 0 | 3.214810  | -0.593400 | -2.536459 |
| 156 | 35 | 0 | -5.298321 | -3.992784 | -1.110142 |

---

**L3a-Ca(II)-TS-si-1-H**

Zero-point correction= 1.29660 a.u.

Thermal correction to Gibbs Free Energy= 1.17990 a.u.

Sum of electronic and zero-point Energies= -4621.02918 a.u.

Sum of electronic and thermal Free Energies= -4621.14587 a.u.

The number of imaginary frequencies 1

Standard orientation

| Center<br>Number | Atomic<br>Number | Atomic<br>Type | Coordinates (Angstroms) |           |           |
|------------------|------------------|----------------|-------------------------|-----------|-----------|
|                  |                  |                | X                       | Y         | Z         |
| 1                | 6                | 0              | 1.760566                | 1.725774  | 1.455226  |
| 2                | 6                | 0              | 2.699056                | 2.214993  | 0.313485  |
| 3                | 6                | 0              | 3.932624                | 2.638409  | 1.108894  |
| 4                | 6                | 0              | 3.667276                | 2.472552  | 2.473467  |
| 5                | 7                | 0              | 2.361838                | 1.950457  | 2.649455  |
| 6                | 8                | 0              | 2.860539                | 1.332708  | -0.665673 |
| 7                | 8                | 0              | 0.643738                | 1.209558  | 1.310055  |
| 8                | 6                | 0              | 1.785833                | 1.613638  | 3.939877  |
| 9                | 6                | 0              | 5.185513                | 3.071835  | 0.703011  |
| 10               | 6                | 0              | 4.607036                | 2.753373  | 3.457273  |
| 11               | 6                | 0              | 5.864378                | 3.207983  | 3.033118  |
| 12               | 6                | 0              | 6.155401                | 3.360625  | 1.675817  |
| 13               | 1                | 0              | 1.751285                | 2.501434  | 4.579451  |
| 14               | 1                | 0              | 0.772815                | 1.247099  | 3.773396  |
| 15               | 1                | 0              | 2.378992                | 0.837916  | 4.435360  |
| 16               | 1                | 0              | 4.389517                | 2.616206  | 4.511954  |
| 17               | 1                | 0              | 6.623706                | 3.434075  | 3.776830  |
| 18               | 1                | 0              | 7.141654                | 3.698639  | 1.369898  |
| 19               | 6                | 0              | 1.869654                | 3.606886  | -0.199002 |
| 20               | 6                | 0              | 2.560219                | 4.066796  | -1.390432 |
| 21               | 8                | 0              | 3.358746                | 5.102762  | -1.221705 |
| 22               | 6                | 0              | 4.183275                | 5.569335  | -2.313962 |
| 23               | 6                | 0              | 2.560914                | 3.186551  | -2.510626 |
| 24               | 1                | 0              | 0.875973                | 3.226197  | -0.439979 |
| 25               | 1                | 0              | 1.839552                | 4.341992  | 0.605877  |
| 26               | 1                | 0              | 4.609856                | 6.509917  | -1.965763 |
| 27               | 1                | 0              | 4.980840                | 4.851637  | -2.522423 |
| 28               | 1                | 0              | 3.574692                | 5.736085  | -3.206185 |
| 29               | 1                | 0              | 1.565841                | 2.858858  | -2.826496 |
| 30               | 1                | 0              | 3.211816                | 3.426764  | -3.349387 |
| 31               | 1                | 0              | 2.886442                | 2.185287  | -1.868198 |
| 32               | 8                | 0              | -0.854895               | -1.595580 | 2.110525  |
| 33               | 8                | 0              | -2.651070               | 0.060157  | 0.700061  |
| 34               | 8                | 0              | -0.991010               | -2.528111 | -1.049883 |

|    |   |   |           |           |           |
|----|---|---|-----------|-----------|-----------|
| 35 | 7 | 0 | -4.336201 | 0.815167  | 2.023589  |
| 36 | 1 | 0 | -4.920930 | 0.643300  | 2.833397  |
| 37 | 7 | 0 | -2.047135 | -2.127201 | 2.536725  |
| 38 | 7 | 0 | 3.251332  | -3.028088 | -1.026913 |
| 39 | 1 | 0 | 3.495786  | -3.781276 | -1.660281 |
| 40 | 7 | 0 | -0.438681 | -3.774148 | -0.890695 |
| 41 | 6 | 0 | -4.786910 | 1.762319  | 1.075240  |
| 42 | 6 | 0 | -5.836625 | 1.423592  | 0.181848  |
| 43 | 6 | 0 | -6.255640 | 2.373887  | -0.767138 |
| 44 | 1 | 0 | -7.043759 | 2.142312  | -1.471337 |
| 45 | 6 | 0 | -5.658678 | 3.628821  | -0.830730 |
| 46 | 1 | 0 | -5.990900 | 4.346395  | -1.570042 |
| 47 | 6 | 0 | -4.627232 | 3.960733  | 0.041984  |
| 48 | 1 | 0 | -4.175367 | 4.940222  | -0.043164 |
| 49 | 6 | 0 | -4.172632 | 3.040075  | 1.003411  |
| 50 | 6 | 0 | -3.022179 | 3.426244  | 1.927983  |
| 51 | 1 | 0 | -2.799567 | 2.605873  | 2.641298  |
| 52 | 6 | 0 | -1.736337 | 3.667472  | 1.128753  |
| 53 | 1 | 0 | -1.510553 | 2.780973  | 0.499483  |
| 54 | 1 | 0 | -0.881943 | 3.831359  | 1.819736  |
| 55 | 1 | 0 | -1.828788 | 4.556414  | 0.469655  |
| 56 | 6 | 0 | -3.377365 | 4.649255  | 2.781707  |
| 57 | 1 | 0 | -2.568014 | 4.849310  | 3.516300  |
| 58 | 1 | 0 | -4.314903 | 4.460555  | 3.347293  |
| 59 | 1 | 0 | -3.512192 | 5.556918  | 2.156689  |
| 60 | 6 | 0 | -6.487947 | 0.044013  | 0.202832  |
| 61 | 1 | 0 | -6.081825 | -0.570319 | 1.032880  |
| 62 | 6 | 0 | -7.998916 | 0.142780  | 0.445441  |
| 63 | 1 | 0 | -8.199944 | 0.725430  | 1.370033  |
| 64 | 1 | 0 | -8.430546 | -0.872298 | 0.578828  |
| 65 | 1 | 0 | -8.517890 | 0.630446  | -0.406502 |
| 66 | 6 | 0 | -6.185223 | -0.723657 | -1.089177 |
| 67 | 1 | 0 | -6.618325 | -0.213349 | -1.975315 |
| 68 | 1 | 0 | -6.609686 | -1.749036 | -1.033306 |
| 69 | 1 | 0 | -5.086670 | -0.818106 | -1.227514 |
| 70 | 6 | 0 | -3.304273 | -0.014401 | 1.747549  |
| 71 | 6 | 0 | -3.045253 | -1.017676 | 2.871734  |
| 72 | 1 | 0 | -3.994205 | -1.516682 | 3.099162  |
| 73 | 6 | 0 | -2.469729 | -0.430694 | 4.159940  |
| 74 | 1 | 0 | -3.186666 | 0.227112  | 4.657222  |
| 75 | 1 | 0 | -1.568683 | 0.142989  | 3.927325  |
| 76 | 6 | 0 | -2.150463 | -1.693433 | 4.984201  |
| 77 | 1 | 0 | -3.032898 | -1.955211 | 5.575704  |
| 78 | 6 | 0 | -0.885520 | -1.614499 | 5.867646  |

|     |   |   |           |           |           |
|-----|---|---|-----------|-----------|-----------|
| 79  | 1 | 0 | -0.689137 | -0.593845 | 6.214994  |
| 80  | 1 | 0 | -1.020902 | -2.240410 | 6.758030  |
| 81  | 6 | 0 | 0.243113  | -2.186518 | 4.992512  |
| 82  | 1 | 0 | 1.095154  | -2.542804 | 5.581870  |
| 83  | 1 | 0 | 0.603888  | -1.429329 | 4.290483  |
| 84  | 6 | 0 | -0.443878 | -3.314209 | 4.204108  |
| 85  | 1 | 0 | 0.096563  | -3.591027 | 3.299293  |
| 86  | 1 | 0 | -0.533435 | -4.209785 | 4.832245  |
| 87  | 6 | 0 | -1.868821 | -2.810421 | 3.931989  |
| 88  | 1 | 0 | -2.612231 | -3.608618 | 3.961680  |
| 89  | 6 | 0 | -2.648997 | -3.067452 | 1.505307  |
| 90  | 1 | 0 | -3.628480 | -3.362918 | 1.893926  |
| 91  | 1 | 0 | -2.782409 | -2.471901 | 0.605091  |
| 92  | 6 | 0 | -1.841848 | -4.332865 | 1.206424  |
| 93  | 1 | 0 | -2.490181 | -4.965507 | 0.590198  |
| 94  | 1 | 0 | -1.689855 | -4.895980 | 2.134256  |
| 95  | 6 | 0 | -0.460229 | -4.214324 | 0.559968  |
| 96  | 1 | 0 | 0.145244  | -3.485146 | 1.092419  |
| 97  | 1 | 0 | 0.028978  | -5.192418 | 0.590318  |
| 98  | 6 | 0 | -1.140047 | -4.790161 | -1.846248 |
| 99  | 1 | 0 | -1.066854 | -5.757674 | -1.346471 |
| 100 | 6 | 0 | -2.583310 | -4.407828 | -2.205987 |
| 101 | 1 | 0 | -3.073614 | -3.820444 | -1.429086 |
| 102 | 1 | 0 | -3.143863 | -5.343570 | -2.330654 |
| 103 | 6 | 0 | -2.487733 | -3.665847 | -3.550992 |
| 104 | 1 | 0 | -2.234180 | -2.616970 | -3.374354 |
| 105 | 1 | 0 | -3.427081 | -3.698330 | -4.113872 |
| 106 | 6 | 0 | -1.336583 | -4.378876 | -4.282520 |
| 107 | 1 | 0 | -0.884121 | -3.766275 | -5.069947 |
| 108 | 1 | 0 | -1.704131 | -5.298668 | -4.754390 |
| 109 | 6 | 0 | -0.323136 | -4.740625 | -3.174474 |
| 110 | 1 | 0 | 0.136435  | -5.716244 | -3.360733 |
| 111 | 6 | 0 | 0.800987  | -3.712543 | -2.927159 |
| 112 | 1 | 0 | 0.494911  | -2.697499 | -3.193519 |
| 113 | 1 | 0 | 1.714990  | -3.961758 | -3.471557 |
| 114 | 6 | 0 | 1.001695  | -3.813819 | -1.414820 |
| 115 | 1 | 0 | 1.385866  | -4.811280 | -1.172898 |
| 116 | 6 | 0 | 1.940735  | -2.786402 | -0.782186 |
| 117 | 6 | 0 | 4.225350  | -2.028452 | -0.781814 |
| 118 | 6 | 0 | 4.694512  | -1.798385 | 0.541485  |
| 119 | 6 | 0 | 5.648601  | -0.787945 | 0.759981  |
| 120 | 1 | 0 | 6.023930  | -0.585823 | 1.754591  |
| 121 | 6 | 0 | 6.137392  | -0.028420 | -0.296856 |
| 122 | 1 | 0 | 6.877041  | 0.739423  | -0.111224 |

|     |    |   |           |           |           |
|-----|----|---|-----------|-----------|-----------|
| 123 | 6  | 0 | 5.674693  | -0.244189 | -1.589924 |
| 124 | 1  | 0 | 6.063326  | 0.378503  | -2.384828 |
| 125 | 6  | 0 | 4.719947  | -1.242080 | -1.858389 |
| 126 | 6  | 0 | 4.221185  | -1.430167 | -3.289355 |
| 127 | 1  | 0 | 3.504141  | -2.271190 | -3.351420 |
| 128 | 6  | 0 | 5.372797  | -1.780616 | -4.239615 |
| 129 | 1  | 0 | 4.973737  | -2.035739 | -5.244872 |
| 130 | 1  | 0 | 5.928686  | -2.663704 | -3.857646 |
| 131 | 1  | 0 | 6.080431  | -0.932617 | -4.353089 |
| 132 | 6  | 0 | 3.461204  | -0.192125 | -3.778582 |
| 133 | 1  | 0 | 2.589440  | 0.002490  | -3.118747 |
| 134 | 1  | 0 | 3.073639  | -0.362396 | -4.805770 |
| 135 | 1  | 0 | 4.114805  | 0.705378  | -3.795886 |
| 136 | 6  | 0 | 4.206482  | -2.630518 | 1.724596  |
| 137 | 1  | 0 | 3.470071  | -3.391193 | 1.393363  |
| 138 | 6  | 0 | 5.361374  | -3.410267 | 2.364152  |
| 139 | 1  | 0 | 5.869903  | -4.034717 | 1.598664  |
| 140 | 1  | 0 | 4.972657  | -4.086182 | 3.155815  |
| 141 | 1  | 0 | 6.107694  | -2.728514 | 2.823974  |
| 142 | 6  | 0 | 3.494926  | -1.755211 | 2.765583  |
| 143 | 1  | 0 | 4.197917  | -1.039654 | 3.241451  |
| 144 | 1  | 0 | 3.057317  | -2.393861 | 3.561897  |
| 145 | 1  | 0 | 2.669497  | -1.184204 | 2.291188  |
| 146 | 8  | 0 | 1.563912  | -1.839136 | -0.084588 |
| 147 | 20 | 0 | -0.413642 | -0.505838 | 0.021845  |
| 148 | 8  | 0 | -0.979966 | 0.847378  | -1.851024 |
| 149 | 16 | 0 | -1.257443 | 1.182182  | -3.283920 |
| 150 | 8  | 0 | -0.335629 | 2.189861  | -3.844724 |
| 151 | 8  | 0 | -1.552919 | 0.017898  | -4.137661 |
| 152 | 6  | 0 | -2.875987 | 2.082398  | -3.143913 |
| 153 | 9  | 0 | -2.745920 | 3.162479  | -2.358530 |
| 154 | 9  | 0 | -3.292601 | 2.489740  | -4.352680 |
| 155 | 9  | 0 | -3.820533 | 1.286813  | -2.620121 |
| 156 | 1  | 0 | 5.422009  | 3.169968  | -0.352912 |

---

**L3a-Ca(II)-TS-re-1-H**

Zero-point correction= 1.29675 a.u.

Thermal correction to Gibbs Free Energy= 1.18379 a.u.

Sum of electronic and zero-point Energies= -4621.03505 a.u.

Sum of electronic and thermal Free Energies= -4621.14801 a.u.

The number of imaginary frequencies            1

Standard orientation

---



| Center<br>Number | Atomic<br>Number | Atomic<br>Type | Coordinates (Angstroms) |           |           |
|------------------|------------------|----------------|-------------------------|-----------|-----------|
|                  |                  |                | X                       | Y         | Z         |
| 1                | 6                | 0              | -3.567185               | -1.012866 | -1.288753 |
| 2                | 6                | 0              | -3.844767               | -1.117821 | -2.709645 |
| 3                | 8                | 0              | -5.113262               | -1.282890 | -3.030103 |
| 4                | 6                | 0              | -5.486724               | -1.520295 | -4.406836 |
| 5                | 6                | 0              | -2.731518               | -1.351379 | -3.565673 |
| 6                | 1                | 0              | -2.752063               | -0.316212 | -1.088665 |
| 7                | 1                | 0              | -4.445782               | -0.791497 | -0.683777 |
| 8                | 1                | 0              | -6.575482               | -1.474405 | -4.418154 |
| 9                | 1                | 0              | -5.149341               | -2.508803 | -4.728446 |
| 10               | 1                | 0              | -5.067805               | -0.744311 | -5.052108 |
| 11               | 1                | 0              | -1.910501               | -0.639385 | -3.455265 |
| 12               | 1                | 0              | -2.929466               | -1.597391 | -4.607062 |
| 13               | 1                | 0              | -2.256937               | -2.272754 | -2.893150 |
| 14               | 6                | 0              | -2.465463               | -2.167097 | 0.633936  |
| 15               | 6                | 0              | -2.924675               | -2.509363 | -0.816146 |
| 16               | 6                | 0              | -4.077283               | -3.473289 | -0.543476 |
| 17               | 6                | 0              | -4.248444               | -3.588466 | 0.840991  |
| 18               | 7                | 0              | -3.288250               | -2.793813 | 1.514462  |
| 19               | 8                | 0              | -1.943736               | -2.928590 | -1.608874 |
| 20               | 8                | 0              | -1.514127               | -1.440213 | 0.943180  |
| 21               | 6                | 0              | -3.150412               | -2.747847 | 2.959807  |
| 22               | 6                | 0              | -4.870558               | -4.224304 | -1.397640 |
| 23               | 6                | 0              | -5.217376               | -4.407591 | 1.407780  |
| 24               | 1                | 0              | -4.090669               | -2.427371 | 3.418672  |
| 25               | 1                | 0              | -2.361753               | -2.038664 | 3.206827  |
| 26               | 1                | 0              | -2.882735               | -3.736074 | 3.349620  |
| 27               | 6                | 0              | -6.028143               | -5.144765 | 0.532025  |
| 28               | 6                | 0              | -5.855747               | -5.062303 | -0.851698 |
| 29               | 1                | 0              | -5.340223               | -4.487509 | 2.483356  |
| 30               | 1                | 0              | -6.794812               | -5.796341 | 0.942619  |
| 31               | 1                | 0              | -6.485583               | -5.653906 | -1.510367 |
| 32               | 8                | 0              | 1.014465                | -0.444293 | 2.661983  |
| 33               | 8                | 0              | 2.527941                | -0.972166 | 0.322531  |
| 34               | 8                | 0              | 1.442735                | 2.133176  | 0.683170  |
| 35               | 7                | 0              | 4.420771                | -2.169475 | 0.687270  |
| 36               | 1                | 0              | 5.105765                | -2.489676 | 1.362284  |
| 37               | 7                | 0              | 2.271189                | -0.428716 | 3.210316  |
| 38               | 7                | 0              | -2.576150               | 3.528448  | 0.762453  |
| 39               | 1                | 0              | -2.560506               | 4.536039  | 0.650022  |
| 40               | 7                | 0              | 1.091818                | 3.151412  | 1.533621  |
| 41               | 6                | 0              | 4.797196                | -2.148031 | -0.676000 |

|    |   |   |           |           |           |
|----|---|---|-----------|-----------|-----------|
| 42 | 6 | 0 | 5.726983  | -1.178349 | -1.136273 |
| 43 | 6 | 0 | 6.031174  | -1.125847 | -2.508750 |
| 44 | 1 | 0 | 6.720424  | -0.386496 | -2.894515 |
| 45 | 6 | 0 | 5.445243  | -2.015463 | -3.403386 |
| 46 | 1 | 0 | 5.688595  | -1.958720 | -4.456631 |
| 47 | 6 | 0 | 4.542475  | -2.973054 | -2.952138 |
| 48 | 1 | 0 | 4.098801  | -3.644182 | -3.675451 |
| 49 | 6 | 0 | 4.201521  | -3.056804 | -1.589946 |
| 50 | 6 | 0 | 3.196254  | -4.108662 | -1.129579 |
| 51 | 1 | 0 | 3.071150  | -4.074496 | -0.027342 |
| 52 | 6 | 0 | 1.811331  | -3.848819 | -1.734942 |
| 53 | 1 | 0 | 1.466994  | -2.824499 | -1.478445 |
| 54 | 1 | 0 | 1.073403  | -4.569799 | -1.322342 |
| 55 | 1 | 0 | 1.825415  | -3.956516 | -2.840128 |
| 56 | 6 | 0 | 3.681824  | -5.526023 | -1.456889 |
| 57 | 1 | 0 | 2.995880  | -6.276634 | -1.008700 |
| 58 | 1 | 0 | 4.695085  | -5.690832 | -1.031699 |
| 59 | 1 | 0 | 3.719863  | -5.701122 | -2.552797 |
| 60 | 6 | 0 | 6.368008  | -0.171040 | -0.185175 |
| 61 | 1 | 0 | 6.066734  | -0.372518 | 0.863280  |
| 62 | 6 | 0 | 7.898289  | -0.267711 | -0.215117 |
| 63 | 1 | 0 | 8.219365  | -1.312053 | -0.012700 |
| 64 | 1 | 0 | 8.336003  | 0.383847  | 0.571441  |
| 65 | 1 | 0 | 8.308495  | 0.050143  | -1.196598 |
| 66 | 6 | 0 | 5.899811  | 1.254073  | -0.498817 |
| 67 | 1 | 0 | 6.214342  | 1.572199  | -1.515398 |
| 68 | 1 | 0 | 6.323057  | 1.967655  | 0.240033  |
| 69 | 1 | 0 | 4.793626  | 1.307792  | -0.431314 |
| 70 | 6 | 0 | 3.316660  | -1.512145 | 1.108748  |
| 71 | 6 | 0 | 3.148816  | -1.543399 | 2.628261  |
| 72 | 1 | 0 | 4.138251  | -1.401292 | 3.075750  |
| 73 | 6 | 0 | 2.514749  | -2.800500 | 3.218699  |
| 74 | 1 | 0 | 3.153175  | -3.675839 | 3.077054  |
| 75 | 1 | 0 | 1.549978  | -2.985221 | 2.738722  |
| 76 | 6 | 0 | 2.358100  | -2.410524 | 4.704631  |
| 77 | 1 | 0 | 3.273111  | -2.693087 | 5.233603  |
| 78 | 6 | 0 | 1.105094  | -2.962353 | 5.420398  |
| 79 | 1 | 0 | 0.782923  | -3.923365 | 5.003981  |
| 80 | 1 | 0 | 1.332157  | -3.126418 | 6.480933  |
| 81 | 6 | 0 | 0.047387  | -1.854657 | 5.274374  |
| 82 | 1 | 0 | -0.744821 | -1.922878 | 6.027963  |
| 83 | 1 | 0 | -0.414112 | -1.903202 | 4.284772  |
| 84 | 6 | 0 | 0.858362  | -0.552567 | 5.382579  |
| 85 | 1 | 0 | 0.348146  | 0.304867  | 4.942235  |

|     |   |   |           |           |           |
|-----|---|---|-----------|-----------|-----------|
| 86  | 1 | 0 | 1.064975  | -0.322874 | 6.435677  |
| 87  | 6 | 0 | 2.204379  | -0.856893 | 4.710652  |
| 88  | 1 | 0 | 3.043944  | -0.355819 | 5.194770  |
| 89  | 6 | 0 | 2.960169  | 0.906831  | 3.002072  |
| 90  | 1 | 0 | 3.954786  | 0.810307  | 3.448178  |
| 91  | 1 | 0 | 3.050710  | 1.020644  | 1.924408  |
| 92  | 6 | 0 | 2.264677  | 2.132703  | 3.600075  |
| 93  | 1 | 0 | 3.017972  | 2.928523  | 3.602333  |
| 94  | 1 | 0 | 2.032505  | 1.955237  | 4.655954  |
| 95  | 6 | 0 | 0.973470  | 2.658572  | 2.966495  |
| 96  | 1 | 0 | 0.209159  | 1.884381  | 2.947345  |
| 97  | 1 | 0 | 0.615886  | 3.505920  | 3.560437  |
| 98  | 6 | 0 | 2.089246  | 4.350398  | 1.394275  |
| 99  | 1 | 0 | 2.092684  | 4.834641  | 2.372256  |
| 100 | 6 | 0 | 3.493138  | 3.949549  | 0.920537  |
| 101 | 1 | 0 | 3.781855  | 2.944442  | 1.225395  |
| 102 | 1 | 0 | 4.198124  | 4.653967  | 1.381589  |
| 103 | 6 | 0 | 3.482834  | 4.144337  | -0.605443 |
| 104 | 1 | 0 | 3.032137  | 3.271601  | -1.084946 |
| 105 | 1 | 0 | 4.489999  | 4.277389  | -1.016159 |
| 106 | 6 | 0 | 2.592798  | 5.383506  | -0.804446 |
| 107 | 1 | 0 | 2.169069  | 5.448707  | -1.812260 |
| 108 | 1 | 0 | 3.177070  | 6.296471  | -0.634429 |
| 109 | 6 | 0 | 1.495572  | 5.263239  | 0.277960  |
| 110 | 1 | 0 | 1.243368  | 6.241540  | 0.698241  |
| 111 | 6 | 0 | 0.194767  | 4.567580  | -0.168360 |
| 112 | 1 | 0 | 0.366839  | 3.864051  | -0.987177 |
| 113 | 1 | 0 | -0.573232 | 5.283099  | -0.472543 |
| 114 | 6 | 0 | -0.219201 | 3.806782  | 1.092090  |
| 115 | 1 | 0 | -0.481250 | 4.524040  | 1.876699  |
| 116 | 6 | 0 | -1.407947 | 2.862362  | 0.918822  |
| 117 | 6 | 0 | -3.774149 | 2.846823  | 0.440399  |
| 118 | 6 | 0 | -4.508913 | 2.183221  | 1.459676  |
| 119 | 6 | 0 | -5.681821 | 1.488875  | 1.111814  |
| 120 | 1 | 0 | -6.256926 | 0.963296  | 1.862667  |
| 121 | 6 | 0 | -6.133795 | 1.466507  | -0.203162 |
| 122 | 1 | 0 | -7.039438 | 0.928585  | -0.452390 |
| 123 | 6 | 0 | -5.421202 | 2.122139  | -1.201483 |
| 124 | 1 | 0 | -5.795365 | 2.075380  | -2.215693 |
| 125 | 6 | 0 | -4.235023 | 2.817530  | -0.903190 |
| 126 | 6 | 0 | -3.462796 | 3.495411  | -2.031176 |
| 127 | 1 | 0 | -2.551416 | 3.992134  | -1.641755 |
| 128 | 6 | 0 | -4.301585 | 4.592347  | -2.696279 |
| 129 | 1 | 0 | -3.689038 | 5.140192  | -3.444214 |

|     |    |   |           |           |           |
|-----|----|---|-----------|-----------|-----------|
| 130 | 1  | 0 | -4.646955 | 5.323141  | -1.933912 |
| 131 | 1  | 0 | -5.187852 | 4.168670  | -3.214290 |
| 132 | 6  | 0 | -2.979892 | 2.470222  | -3.063218 |
| 133 | 1  | 0 | -2.368873 | 1.694028  | -2.559161 |
| 134 | 1  | 0 | -2.344552 | 2.966678  | -3.827333 |
| 135 | 1  | 0 | -3.830548 | 1.980116  | -3.581882 |
| 136 | 6  | 0 | -4.062107 | 2.214393  | 2.918732  |
| 137 | 1  | 0 | -3.150343 | 2.835279  | 3.038272  |
| 138 | 6  | 0 | -5.128718 | 2.854896  | 3.815147  |
| 139 | 1  | 0 | -5.390521 | 3.865611  | 3.434870  |
| 140 | 1  | 0 | -4.739368 | 2.967833  | 4.849799  |
| 141 | 1  | 0 | -6.050754 | 2.237600  | 3.857079  |
| 142 | 6  | 0 | -3.702842 | 0.808658  | 3.412314  |
| 143 | 1  | 0 | -4.594912 | 0.148085  | 3.431905  |
| 144 | 1  | 0 | -3.279488 | 0.858435  | 4.438492  |
| 145 | 1  | 0 | -2.936432 | 0.358320  | 2.748068  |
| 146 | 8  | 0 | -1.343976 | 1.627059  | 0.944463  |
| 147 | 20 | 0 | 0.360886  | 0.020258  | 0.437615  |
| 148 | 8  | 0 | 0.188142  | 0.483410  | -1.889895 |
| 149 | 16 | 0 | 0.609757  | 1.109131  | -3.185225 |
| 150 | 8  | 0 | -0.127561 | 0.589864  | -4.351913 |
| 151 | 8  | 0 | 0.787674  | 2.571486  | -3.122160 |
| 152 | 6  | 0 | 2.327097  | 0.432612  | -3.392903 |
| 153 | 9  | 0 | 2.292794  | -0.906259 | -3.457336 |
| 154 | 9  | 0 | 2.890138  | 0.896121  | -4.517776 |
| 155 | 9  | 0 | 3.102139  | 0.787054  | -2.354868 |
| 156 | 1  | 0 | -4.728283 | -4.171996 | -2.473697 |

-----

**L3a-Ca(II)-TS1-si**

Zero-point correction= 1.26080 a.u.

Thermal correction to Gibbs Free Energy= 1.15595 a.u.

Sum of electronic and zero-point Energies= -6232.80092 a.u.

Sum of electronic and thermal Free Energies= -6232.90578 a.u.

The number of imaginary frequencies        1

Standard orientation

-----

| Center<br>Number | Atomic<br>Number | Atomic<br>Type | Coordinates (Angstroms) |          |           |
|------------------|------------------|----------------|-------------------------|----------|-----------|
|                  |                  |                | X                       | Y        | Z         |
| 1                | 6                | 0              | -0.888586               | 1.229499 | -1.832219 |
| 2                | 6                | 0              | -1.072042               | 2.047323 | -0.531317 |
| 3                | 6                | 0              | -2.365128               | 2.772300 | -0.783874 |
| 4                | 6                | 0              | -2.772912               | 2.474805 | -2.099513 |

-----

|    |    |   |           |           |           |
|----|----|---|-----------|-----------|-----------|
| 5  | 7  | 0 | -1.861235 | 1.576183  | -2.705659 |
| 6  | 8  | 0 | -0.738958 | 1.476054  | 0.565062  |
| 7  | 6  | 0 | -3.182919 | 3.572539  | -0.004555 |
| 8  | 6  | 0 | -3.943387 | 2.976813  | -2.648199 |
| 9  | 8  | 0 | -0.012953 | 0.368076  | -1.981222 |
| 10 | 6  | 0 | -2.012342 | 1.013742  | -4.039967 |
| 11 | 1  | 0 | -1.904120 | 1.797798  | -4.795674 |
| 12 | 1  | 0 | -1.233066 | 0.264180  | -4.179625 |
| 13 | 1  | 0 | -2.994889 | 0.546119  | -4.145500 |
| 14 | 6  | 0 | -4.375259 | 4.093055  | -0.520062 |
| 15 | 6  | 0 | -4.738020 | 3.795770  | -1.833942 |
| 16 | 35 | 0 | -2.715469 | 3.946980  | 1.811604  |
| 17 | 1  | 0 | -5.013634 | 4.713213  | 0.099179  |
| 18 | 1  | 0 | -5.664688 | 4.199590  | -2.230330 |
| 19 | 1  | 0 | -4.246157 | 2.736255  | -3.661569 |
| 20 | 6  | 0 | 0.323212  | 3.342050  | -1.044604 |
| 21 | 6  | 0 | 0.331942  | 4.325416  | -0.036293 |
| 22 | 8  | 0 | -0.250902 | 5.462784  | -0.328302 |
| 23 | 6  | 0 | -0.357742 | 6.543438  | 0.632702  |
| 24 | 1  | 0 | -0.735509 | 7.388609  | 0.058383  |
| 25 | 6  | 0 | 0.893915  | 4.003322  | 1.300352  |
| 26 | 1  | 0 | -1.072823 | 6.268584  | 1.410587  |
| 27 | 1  | 0 | 0.472746  | 3.024410  | 1.585235  |
| 28 | 1  | 0 | 1.135593  | 2.625242  | -0.976777 |
| 29 | 1  | 0 | 0.088374  | 3.686401  | -2.049163 |
| 30 | 1  | 0 | 1.978455  | 3.866286  | 1.219574  |
| 31 | 1  | 0 | 0.620677  | 6.779283  | 1.055343  |
| 32 | 1  | 0 | 0.685940  | 4.742921  | 2.072091  |
| 33 | 8  | 0 | 2.875958  | -0.177827 | 0.357240  |
| 34 | 8  | 0 | 1.648184  | -2.352057 | -0.885193 |
| 35 | 8  | 0 | 0.327271  | -1.926491 | 2.161567  |
| 36 | 8  | 0 | -1.586003 | -1.621132 | 0.112714  |
| 37 | 7  | 0 | 5.016091  | 0.120547  | -0.322795 |
| 38 | 1  | 0 | 5.805624  | -0.255711 | -0.836622 |
| 39 | 7  | 0 | 2.822626  | -2.955737 | -0.503125 |
| 40 | 7  | 0 | -3.544839 | -2.703278 | 0.475143  |
| 41 | 1  | 0 | -4.096670 | -3.273003 | 1.107162  |
| 42 | 7  | 0 | -0.280800 | -3.151515 | 2.268928  |
| 43 | 6  | 0 | 4.983629  | 1.517353  | -0.091671 |
| 44 | 6  | 0 | 5.044341  | 2.020289  | 1.236174  |
| 45 | 6  | 0 | 4.944931  | 3.408024  | 1.444016  |
| 46 | 1  | 0 | 4.981779  | 3.821806  | 2.443027  |
| 47 | 6  | 0 | 4.786638  | 4.280274  | 0.372541  |
| 48 | 1  | 0 | 4.702430  | 5.344451  | 0.552107  |

|    |   |   |          |           |           |
|----|---|---|----------|-----------|-----------|
| 49 | 6 | 0 | 4.727190 | 3.791159  | -0.927687 |
| 50 | 1 | 0 | 4.592307 | 4.496825  | -1.736774 |
| 51 | 6 | 0 | 4.833319 | 2.412248  | -1.185621 |
| 52 | 6 | 0 | 4.753755 | 1.913332  | -2.626327 |
| 53 | 1 | 0 | 4.910762 | 0.818092  | -2.673795 |
| 54 | 6 | 0 | 3.366690 | 2.171942  | -3.224357 |
| 55 | 1 | 0 | 2.594865 | 1.642453  | -2.627487 |
| 56 | 1 | 0 | 3.317021 | 1.779648  | -4.262679 |
| 57 | 1 | 0 | 3.127988 | 3.256414  | -3.246276 |
| 58 | 6 | 0 | 5.853419 | 2.535700  | -3.495332 |
| 59 | 1 | 0 | 5.856885 | 2.063811  | -4.501413 |
| 60 | 1 | 0 | 6.849229 | 2.363739  | -3.033459 |
| 61 | 1 | 0 | 5.701038 | 3.627626  | -3.626280 |
| 62 | 6 | 0 | 5.213584 | 1.094342  | 2.437391  |
| 63 | 1 | 0 | 5.294398 | 0.037166  | 2.109832  |
| 64 | 6 | 0 | 6.509190 | 1.404058  | 3.197123  |
| 65 | 1 | 0 | 7.378149 | 1.351120  | 2.506679  |
| 66 | 1 | 0 | 6.666704 | 0.657017  | 4.004379  |
| 67 | 1 | 0 | 6.479450 | 2.413517  | 3.659188  |
| 68 | 6 | 0 | 3.998553 | 1.172524  | 3.371124  |
| 69 | 1 | 0 | 3.914880 | 2.173910  | 3.843865  |
| 70 | 1 | 0 | 4.085415 | 0.411777  | 4.176409  |
| 71 | 1 | 0 | 3.063516 | 0.967813  | 2.807759  |
| 72 | 6 | 0 | 3.894576 | -0.622423 | -0.190861 |
| 73 | 6 | 0 | 4.022991 | -2.034186 | -0.761775 |
| 74 | 1 | 0 | 4.890170 | -2.512403 | -0.292281 |
| 75 | 6 | 0 | 4.171288 | -2.094270 | -2.283790 |
| 76 | 1 | 0 | 5.130592 | -1.687067 | -2.611965 |
| 77 | 1 | 0 | 3.366441 | -1.520656 | -2.752297 |
| 78 | 6 | 0 | 4.049025 | -3.599617 | -2.577792 |
| 79 | 1 | 0 | 5.045027 | -4.048530 | -2.521607 |
| 80 | 6 | 0 | 3.340566 | -3.956175 | -3.902669 |
| 81 | 1 | 0 | 3.514763 | -3.202087 | -4.678139 |
| 82 | 1 | 0 | 3.727550 | -4.909972 | -4.281337 |
| 83 | 6 | 0 | 1.858557 | -4.105107 | -3.520396 |
| 84 | 1 | 0 | 1.290526 | -4.695729 | -4.247111 |
| 85 | 1 | 0 | 1.386501 | -3.120819 | -3.437416 |
| 86 | 6 | 0 | 1.908326 | -4.764637 | -2.131450 |
| 87 | 1 | 0 | 0.990923 | -4.626540 | -1.560128 |
| 88 | 1 | 0 | 2.086331 | -5.842448 | -2.235632 |
| 89 | 6 | 0 | 3.145090 | -4.167223 | -1.443565 |
| 90 | 1 | 0 | 3.670450 | -4.886369 | -0.814280 |
| 91 | 6 | 0 | 2.791612 | -3.368968 | 0.959784  |
| 92 | 1 | 0 | 3.788657 | -3.756409 | 1.186351  |

|     |   |   |           |           |           |
|-----|---|---|-----------|-----------|-----------|
| 93  | 1 | 0 | 2.627073  | -2.455301 | 1.526819  |
| 94  | 6 | 0 | 1.762280  | -4.439115 | 1.335671  |
| 95  | 1 | 0 | 2.017339  | -4.752875 | 2.353744  |
| 96  | 1 | 0 | 1.919315  | -5.328881 | 0.715257  |
| 97  | 6 | 0 | 0.265281  | -4.131865 | 1.247377  |
| 98  | 1 | 0 | 0.020888  | -3.708351 | 0.274890  |
| 99  | 1 | 0 | -0.293185 | -5.061467 | 1.387708  |
| 100 | 6 | 0 | -0.169907 | -3.664156 | 3.740080  |
| 101 | 1 | 0 | -0.175488 | -4.752758 | 3.669104  |
| 102 | 6 | 0 | 1.049328  | -3.115742 | 4.495806  |
| 103 | 1 | 0 | 1.895178  | -2.897725 | 3.842659  |
| 104 | 1 | 0 | 1.361364  | -3.891214 | 5.206916  |
| 105 | 6 | 0 | 0.537800  | -1.880086 | 5.257420  |
| 106 | 1 | 0 | 0.531704  | -1.017065 | 4.584777  |
| 107 | 1 | 0 | 1.160915  | -1.633617 | 6.124081  |
| 108 | 6 | 0 | -0.899719 | -2.262980 | 5.652205  |
| 109 | 1 | 0 | -1.535510 | -1.394932 | 5.858643  |
| 110 | 1 | 0 | -0.886019 | -2.879396 | 6.559070  |
| 111 | 6 | 0 | -1.430842 | -3.102264 | 4.467799  |
| 112 | 1 | 0 | -2.054629 | -3.930204 | 4.817338  |
| 113 | 6 | 0 | -2.214646 | -2.321482 | 3.392219  |
| 114 | 1 | 0 | -1.910399 | -1.272421 | 3.344497  |
| 115 | 1 | 0 | -3.294600 | -2.368190 | 3.549083  |
| 116 | 6 | 0 | -1.802119 | -3.036823 | 2.105587  |
| 117 | 1 | 0 | -2.183753 | -4.063729 | 2.129572  |
| 118 | 6 | 0 | -2.274065 | -2.380747 | 0.806993  |
| 119 | 6 | 0 | -4.224733 | -1.999215 | -0.547855 |
| 120 | 6 | 0 | -3.990469 | -2.324925 | -1.910899 |
| 121 | 6 | 0 | -4.638815 | -1.577474 | -2.910687 |
| 122 | 1 | 0 | -4.479449 | -1.798650 | -3.957636 |
| 123 | 6 | 0 | -5.496476 | -0.534200 | -2.578185 |
| 124 | 1 | 0 | -5.980785 | 0.035321  | -3.360960 |
| 125 | 6 | 0 | -5.733138 | -0.218393 | -1.244837 |
| 126 | 1 | 0 | -6.401380 | 0.602718  | -1.021505 |
| 127 | 6 | 0 | -5.111769 | -0.942263 | -0.210854 |
| 128 | 6 | 0 | -5.384780 | -0.557836 | 1.240030  |
| 129 | 1 | 0 | -4.846758 | -1.232729 | 1.934695  |
| 130 | 6 | 0 | -6.873579 | -0.692763 | 1.580992  |
| 131 | 1 | 0 | -7.033680 | -0.519152 | 2.666801  |
| 132 | 1 | 0 | -7.228383 | -1.718463 | 1.342178  |
| 133 | 1 | 0 | -7.488951 | 0.039927  | 1.017483  |
| 134 | 6 | 0 | -4.876296 | 0.855568  | 1.538709  |
| 135 | 1 | 0 | -3.792851 | 0.921539  | 1.304612  |
| 136 | 1 | 0 | -5.008107 | 1.090979  | 2.616311  |

|     |    |   |           |           |           |
|-----|----|---|-----------|-----------|-----------|
| 137 | 1  | 0 | -5.424599 | 1.616239  | 0.944581  |
| 138 | 6  | 0 | -3.066006 | -3.470315 | -2.313937 |
| 139 | 1  | 0 | -2.652630 | -3.976659 | -1.417109 |
| 140 | 6  | 0 | -3.827224 | -4.548061 | -3.095088 |
| 141 | 1  | 0 | -4.698590 | -4.904014 | -2.504587 |
| 142 | 1  | 0 | -3.165004 | -5.419436 | -3.287513 |
| 143 | 1  | 0 | -4.189017 | -4.164068 | -4.072055 |
| 144 | 6  | 0 | -1.865968 | -2.956008 | -3.118249 |
| 145 | 1  | 0 | -2.184144 | -2.518203 | -4.087709 |
| 146 | 1  | 0 | -1.165297 | -3.791724 | -3.327393 |
| 147 | 1  | 0 | -1.317336 | -2.183881 | -2.539273 |
| 148 | 20 | 0 | 0.543554  | -0.588415 | 0.257644  |

---

### L3a-Ca(II)-TS2-si

Zero-point correction= 1.25926 a.u.

Thermal correction to Gibbs Free Energy= 1.15635 a.u.

Sum of electronic and zero-point Energies= -6232.80262 a.u.

Sum of electronic and thermal Free Energies= -6232.90553 a.u.

The number of imaginary frequencies 1

Standard orientation

---

| Center<br>Number | Atomic<br>Number | Atomic<br>Type | Coordinates (Angstroms) |          |           |
|------------------|------------------|----------------|-------------------------|----------|-----------|
|                  |                  |                | X                       | Y        | Z         |
| 1                | 6                | 0              | -1.022913               | 1.330989 | -2.053056 |
| 2                | 6                | 0              | -0.675265               | 2.327771 | -0.920381 |
| 3                | 6                | 0              | -1.890396               | 3.247265 | -0.960528 |
| 4                | 6                | 0              | -2.643722               | 2.925141 | -2.103968 |
| 5                | 7                | 0              | -2.078238               | 1.799108 | -2.754364 |
| 6                | 8                | 0              | -0.406002               | 1.662822 | 0.246285  |
| 7                | 6                | 0              | -2.368268               | 4.240614 | -0.124328 |
| 8                | 6                | 0              | -3.804954               | 3.597882 | -2.456059 |
| 9                | 8                | 0              | -0.411212               | 0.270572 | -2.238941 |
| 10               | 6                | 0              | -2.644954               | 1.152212 | -3.929480 |
| 11               | 1                | 0              | -2.528320               | 1.796411 | -4.806388 |
| 12               | 1                | 0              | -2.113182               | 0.214454 | -4.092263 |
| 13               | 1                | 0              | -3.706972               | 0.947716 | -3.773780 |
| 14               | 6                | 0              | -3.540136               | 4.940407 | -0.438979 |
| 15               | 6                | 0              | -4.236949               | 4.622755 | -1.603953 |
| 16               | 35               | 0              | -1.489522               | 4.636925 | 1.529746  |
| 17               | 1                | 0              | -3.906046               | 5.714123 | 0.226525  |
| 18               | 1                | 0              | -5.143712               | 5.169698 | -1.844058 |
| 19               | 1                | 0              | -4.368823               | 3.335623 | -3.344559 |



|    |   |   |           |           |           |
|----|---|---|-----------|-----------|-----------|
| 20 | 6 | 0 | 0.653535  | 3.081326  | -1.503001 |
| 21 | 6 | 0 | 1.346583  | 3.763696  | -0.393124 |
| 22 | 8 | 0 | 1.252274  | 5.070732  | -0.392667 |
| 23 | 6 | 0 | 1.880547  | 5.840805  | 0.661877  |
| 24 | 1 | 0 | 1.813149  | 6.877266  | 0.333876  |
| 25 | 6 | 0 | 1.811473  | 2.953322  | 0.661566  |
| 26 | 1 | 0 | 1.333951  | 5.705631  | 1.596923  |
| 27 | 1 | 0 | 0.662377  | 2.329344  | 0.761427  |
| 28 | 1 | 0 | 1.287680  | 2.276197  | -1.882807 |
| 29 | 1 | 0 | 0.382429  | 3.761344  | -2.311042 |
| 30 | 1 | 0 | 2.357845  | 2.063729  | 0.342581  |
| 31 | 1 | 0 | 2.925056  | 5.540229  | 0.774300  |
| 32 | 1 | 0 | 2.197835  | 3.419281  | 1.563775  |
| 33 | 8 | 0 | 2.573176  | -0.328388 | -0.276715 |
| 34 | 8 | 0 | 1.095822  | -2.570348 | -1.132553 |
| 35 | 8 | 0 | 0.148385  | -1.940228 | 1.965015  |
| 36 | 8 | 0 | -1.935216 | -1.594951 | 0.066547  |
| 37 | 7 | 0 | 4.822362  | -0.614039 | -0.326049 |
| 38 | 1 | 0 | 5.607679  | -1.183801 | -0.620758 |
| 39 | 7 | 0 | 2.257267  | -3.248962 | -0.870600 |
| 40 | 7 | 0 | -3.976222 | -2.119882 | 0.900455  |
| 41 | 1 | 0 | -4.503032 | -2.487066 | 1.685596  |
| 42 | 7 | 0 | -0.559012 | -3.100795 | 2.173175  |
| 43 | 6 | 0 | 5.086106  | 0.709926  | 0.097463  |
| 44 | 6 | 0 | 4.969272  | 1.050017  | 1.470936  |
| 45 | 6 | 0 | 5.156023  | 2.389164  | 1.858875  |
| 46 | 1 | 0 | 5.062496  | 2.682948  | 2.896020  |
| 47 | 6 | 0 | 5.456278  | 3.368466  | 0.917518  |
| 48 | 1 | 0 | 5.591549  | 4.395025  | 1.232706  |
| 49 | 6 | 0 | 5.584139  | 3.034474  | -0.426701 |
| 50 | 1 | 0 | 5.816010  | 3.820560  | -1.133033 |
| 51 | 6 | 0 | 5.411288  | 1.707069  | -0.859331 |
| 52 | 6 | 0 | 5.553049  | 1.375489  | -2.341731 |
| 53 | 1 | 0 | 5.418221  | 0.288582  | -2.515638 |
| 54 | 6 | 0 | 4.473913  | 2.080677  | -3.169763 |
| 55 | 1 | 0 | 3.467290  | 1.793363  | -2.801284 |
| 56 | 1 | 0 | 4.546701  | 1.773749  | -4.235152 |
| 57 | 1 | 0 | 4.575167  | 3.185153  | -3.114362 |
| 58 | 6 | 0 | 6.955778  | 1.719663  | -2.857297 |
| 59 | 1 | 0 | 7.074492  | 1.367083  | -3.904381 |
| 60 | 1 | 0 | 7.725471  | 1.213278  | -2.236160 |
| 61 | 1 | 0 | 7.140415  | 2.814500  | -2.836541 |
| 62 | 6 | 0 | 4.644284  | -0.000736 | 2.528283  |
| 63 | 1 | 0 | 4.573170  | -1.009339 | 2.070555  |

|     |   |   |           |           |           |
|-----|---|---|-----------|-----------|-----------|
| 64  | 6 | 0 | 5.754775  | -0.091752 | 3.582023  |
| 65  | 1 | 0 | 6.734676  | -0.272815 | 3.090601  |
| 66  | 1 | 0 | 5.556632  | -0.939711 | 4.272527  |
| 67  | 1 | 0 | 5.821603  | 0.838174  | 4.185103  |
| 68  | 6 | 0 | 3.287358  | 0.278206  | 3.184245  |
| 69  | 1 | 0 | 3.286303  | 1.251534  | 3.718717  |
| 70  | 1 | 0 | 3.052388  | -0.521693 | 3.917135  |
| 71  | 1 | 0 | 2.484316  | 0.289493  | 2.417076  |
| 72  | 6 | 0 | 3.560274  | -1.029194 | -0.556361 |
| 73  | 6 | 0 | 3.488428  | -2.401292 | -1.223269 |
| 74  | 1 | 0 | 4.357138  | -2.985079 | -0.903954 |
| 75  | 6 | 0 | 3.437038  | -2.371891 | -2.749881 |
| 76  | 1 | 0 | 4.371053  | -1.997741 | -3.175661 |
| 77  | 1 | 0 | 2.615459  | -1.728484 | -3.075715 |
| 78  | 6 | 0 | 3.179603  | -3.853627 | -3.096663 |
| 79  | 1 | 0 | 4.144583  | -4.357452 | -3.204337 |
| 80  | 6 | 0 | 2.273389  | -4.104070 | -4.323194 |
| 81  | 1 | 0 | 2.360170  | -3.305419 | -5.068154 |
| 82  | 1 | 0 | 2.570918  | -5.039491 | -4.812264 |
| 83  | 6 | 0 | 0.854496  | -4.243779 | -3.744924 |
| 84  | 1 | 0 | 0.177389  | -4.786907 | -4.413171 |
| 85  | 1 | 0 | 0.422905  | -3.257703 | -3.548707 |
| 86  | 6 | 0 | 1.077932  | -4.975373 | -2.410253 |
| 87  | 1 | 0 | 0.250236  | -4.854797 | -1.711588 |
| 88  | 1 | 0 | 1.213262  | -6.049556 | -2.590438 |
| 89  | 6 | 0 | 2.412634  | -4.440679 | -1.870234 |
| 90  | 1 | 0 | 2.990115  | -5.195023 | -1.334140 |
| 91  | 6 | 0 | 2.329775  | -3.674399 | 0.585644  |
| 92  | 1 | 0 | 3.296912  | -4.169835 | 0.714341  |
| 93  | 1 | 0 | 2.319639  | -2.751533 | 1.164415  |
| 94  | 6 | 0 | 1.227332  | -4.621923 | 1.064968  |
| 95  | 1 | 0 | 1.544913  | -4.971692 | 2.053772  |
| 96  | 1 | 0 | 1.220355  | -5.516543 | 0.432018  |
| 97  | 6 | 0 | -0.229008 | -4.150480 | 1.125776  |
| 98  | 1 | 0 | -0.532511 | -3.721609 | 0.173702  |
| 99  | 1 | 0 | -0.862175 | -5.013135 | 1.352769  |
| 100 | 6 | 0 | -0.326965 | -3.615807 | 3.632572  |
| 101 | 1 | 0 | -0.407526 | -4.701880 | 3.570816  |
| 102 | 6 | 0 | 0.997807  | -3.144566 | 4.248798  |
| 103 | 1 | 0 | 1.770677  | -2.962588 | 3.501734  |
| 104 | 1 | 0 | 1.348660  | -3.943654 | 4.913948  |
| 105 | 6 | 0 | 0.640812  | -1.894915 | 5.073531  |
| 106 | 1 | 0 | 0.596525  | -1.023152 | 4.412813  |
| 107 | 1 | 0 | 1.371579  | -1.687900 | 5.862642  |

|     |    |   |           |           |           |
|-----|----|---|-----------|-----------|-----------|
| 108 | 6  | 0 | -0.758151 | -2.212589 | 5.627677  |
| 109 | 1  | 0 | -1.316836 | -1.319891 | 5.930036  |
| 110 | 1  | 0 | -0.673714 | -2.858291 | 6.510140  |
| 111 | 6  | 0 | -1.464627 | -2.982853 | 4.490573  |
| 112 | 1  | 0 | -2.113701 | -3.770357 | 4.884887  |
| 113 | 6  | 0 | -2.282237 | -2.118769 | 3.511130  |
| 114 | 1  | 0 | -1.893987 | -1.098430 | 3.441455  |
| 115 | 1  | 0 | -3.340137 | -2.073394 | 3.781082  |
| 116 | 6  | 0 | -2.071126 | -2.840993 | 2.180049  |
| 117 | 1  | 0 | -2.546428 | -3.826920 | 2.229113  |
| 118 | 6  | 0 | -2.626404 | -2.119542 | 0.951411  |
| 119 | 6  | 0 | -4.663435 | -1.320244 | -0.044675 |
| 120 | 6  | 0 | -4.817374 | -1.775433 | -1.382074 |
| 121 | 6  | 0 | -5.465960 | -0.944470 | -2.313411 |
| 122 | 1  | 0 | -5.594279 | -1.259530 | -3.340392 |
| 123 | 6  | 0 | -5.951189 | 0.304197  | -1.938766 |
| 124 | 1  | 0 | -6.441684 | 0.933376  | -2.670392 |
| 125 | 6  | 0 | -5.799236 | 0.752912  | -0.631583 |
| 126 | 1  | 0 | -6.177212 | 1.734398  | -0.377371 |
| 127 | 6  | 0 | -5.160131 | -0.044608 | 0.334971  |
| 128 | 6  | 0 | -4.985361 | 0.494352  | 1.751701  |
| 129 | 1  | 0 | -4.485889 | -0.253222 | 2.399511  |
| 130 | 6  | 0 | -6.339717 | 0.791895  | 2.405668  |
| 131 | 1  | 0 | -6.195045 | 1.073469  | 3.470861  |
| 132 | 1  | 0 | -6.985928 | -0.111598 | 2.374704  |
| 133 | 1  | 0 | -6.864346 | 1.626455  | 1.894483  |
| 134 | 6  | 0 | -4.087152 | 1.735867  | 1.759905  |
| 135 | 1  | 0 | -3.107577 | 1.497423  | 1.294437  |
| 136 | 1  | 0 | -3.898137 | 2.065428  | 2.803793  |
| 137 | 1  | 0 | -4.556956 | 2.576349  | 1.207797  |
| 138 | 6  | 0 | -4.298811 | -3.139571 | -1.829111 |
| 139 | 1  | 0 | -3.836857 | -3.681785 | -0.978560 |
| 140 | 6  | 0 | -5.441379 | -4.031562 | -2.329123 |
| 141 | 1  | 0 | -6.226045 | -4.121467 | -1.547432 |
| 142 | 1  | 0 | -5.059680 | -5.051434 | -2.550443 |
| 143 | 1  | 0 | -5.901567 | -3.624400 | -3.254054 |
| 144 | 6  | 0 | -3.208054 | -2.993851 | -2.898472 |
| 145 | 1  | 0 | -3.614792 | -2.558484 | -3.835607 |
| 146 | 1  | 0 | -2.770172 | -3.987233 | -3.135313 |
| 147 | 1  | 0 | -2.390343 | -2.340403 | -2.527971 |
| 148 | 20 | 0 | 0.237913  | -0.696329 | -0.029449 |

---

**L3a-Ca(II)-TS1-re**

Zero-point correction= 1.26050 a.u.

Thermal correction to Gibbs Free Energy= 1.15561 a.u.

Sum of electronic and zero-point Energies= -6232.79729 a.u.

Sum of electronic and thermal Free Energies= -6232.90219 a.u.

The number of imaginary frequencies 1

Standard orientation

| Center<br>Number | Atomic<br>Number | Atomic<br>Type | Coordinates (Angstroms) |           |           |
|------------------|------------------|----------------|-------------------------|-----------|-----------|
|                  |                  |                | X                       | Y         | Z         |
| 1                | 6                | 0              | -0.586749               | -3.513763 | -1.376662 |
| 2                | 6                | 0              | -0.898144               | -4.348852 | -0.275268 |
| 3                | 8                | 0              | -1.816840               | -5.254788 | -0.484423 |
| 4                | 6                | 0              | -2.295321               | -6.136414 | 0.565409  |
| 5                | 6                | 0              | -0.275508               | -4.081049 | 1.041875  |
| 6                | 1                | 0              | 0.427045                | -3.122906 | -1.363280 |
| 7                | 1                | 0              | -0.911616               | -3.890354 | -2.344343 |
| 8                | 1                | 0              | -2.937994               | -6.851106 | 0.052937  |
| 9                | 1                | 0              | -2.874314               | -5.558955 | 1.288152  |
| 10               | 1                | 0              | -1.460192               | -6.652356 | 1.042707  |
| 11               | 1                | 0              | 0.804475                | -4.259527 | 0.977881  |
| 12               | 1                | 0              | -0.688259               | -4.655332 | 1.869923  |
| 13               | 1                | 0              | -0.407945               | -2.996857 | 1.213931  |
| 14               | 6                | 0              | -1.008658               | -1.251785 | -2.418795 |
| 15               | 6                | 0              | -1.476885               | -1.863825 | -1.073840 |
| 16               | 6                | 0              | -2.925046               | -2.174334 | -1.359989 |
| 17               | 6                | 0              | -3.152255               | -1.950051 | -2.731661 |
| 18               | 7                | 0              | -1.982092               | -1.433513 | -3.343326 |
| 19               | 8                | 0              | -1.041703               | -1.303912 | -0.000960 |
| 20               | 8                | 0              | 0.071204                | -0.664038 | -2.562551 |
| 21               | 6                | 0              | -1.878237               | -1.052111 | -4.745158 |
| 22               | 6                | 0              | -3.984223               | -2.587042 | -0.572298 |
| 23               | 6                | 0              | -4.386756               | -2.166637 | -3.325729 |
| 24               | 1                | 0              | -1.930416               | -1.940438 | -5.382524 |
| 25               | 1                | 0              | -0.917860               | -0.556141 | -4.889544 |
| 26               | 1                | 0              | -2.685892               | -0.367593 | -5.018226 |
| 27               | 6                | 0              | -5.431886               | -2.605488 | -2.500157 |
| 28               | 6                | 0              | -5.247685               | -2.808694 | -1.132496 |
| 29               | 1                | 0              | -4.549929               | -1.989665 | -4.383196 |
| 30               | 1                | 0              | -6.413265               | -2.778168 | -2.931395 |
| 31               | 1                | 0              | -6.074815               | -3.125973 | -0.507203 |
| 32               | 35               | 0              | -3.745350               | -2.825912 | 1.311260  |
| 33               | 8                | 0              | 1.248829                | 2.716463  | -0.300531 |
| 34               | 8                | 0              | -1.386492               | 1.749362  | -0.449677 |

|    |   |   |           |           |           |
|----|---|---|-----------|-----------|-----------|
| 35 | 8 | 0 | 1.152571  | 0.418201  | 1.978070  |
| 36 | 7 | 0 | -2.954575 | 3.233519  | 0.256412  |
| 37 | 1 | 0 | -3.161989 | 4.162870  | 0.602608  |
| 38 | 7 | 0 | 0.692487  | 3.763641  | 0.385155  |
| 39 | 7 | 0 | 4.940134  | -1.030517 | 0.553469  |
| 40 | 1 | 0 | 5.555259  | -1.229253 | 1.334292  |
| 41 | 7 | 0 | 2.347176  | 0.702242  | 2.588484  |
| 42 | 6 | 0 | -3.998086 | 2.278931  | 0.254931  |
| 43 | 6 | 0 | -4.343956 | 1.608129  | 1.456360  |
| 44 | 6 | 0 | -5.353470 | 0.629066  | 1.422526  |
| 45 | 1 | 0 | -5.636954 | 0.095511  | 2.320048  |
| 46 | 6 | 0 | -6.006400 | 0.319569  | 0.233741  |
| 47 | 1 | 0 | -6.777461 | -0.439970 | 0.224811  |
| 48 | 6 | 0 | -5.674794 | 0.983049  | -0.942981 |
| 49 | 1 | 0 | -6.201356 | 0.717778  | -1.850154 |
| 50 | 6 | 0 | -4.682217 | 1.979802  | -0.952132 |
| 51 | 6 | 0 | -4.367022 | 2.716581  | -2.250128 |
| 52 | 1 | 0 | -3.611894 | 3.511102  | -2.076902 |
| 53 | 6 | 0 | -3.768088 | 1.763506  | -3.288256 |
| 54 | 1 | 0 | -2.855084 | 1.283629  | -2.876991 |
| 55 | 1 | 0 | -3.476153 | 2.325631  | -4.200976 |
| 56 | 1 | 0 | -4.494588 | 0.975469  | -3.578154 |
| 57 | 6 | 0 | -5.607614 | 3.426639  | -2.805798 |
| 58 | 1 | 0 | -5.329232 | 4.050555  | -3.682056 |
| 59 | 1 | 0 | -6.042717 | 4.096455  | -2.033454 |
| 60 | 1 | 0 | -6.382972 | 2.700841  | -3.129814 |
| 61 | 6 | 0 | -3.642751 | 1.920541  | 2.774553  |
| 62 | 1 | 0 | -2.885673 | 2.720663  | 2.637444  |
| 63 | 6 | 0 | -4.636040 | 2.443392  | 3.819442  |
| 64 | 1 | 0 | -5.187721 | 3.320171  | 3.417535  |
| 65 | 1 | 0 | -4.093077 | 2.768654  | 4.732790  |
| 66 | 1 | 0 | -5.369161 | 1.661776  | 4.110850  |
| 67 | 6 | 0 | -2.885928 | 0.697362  | 3.302366  |
| 68 | 1 | 0 | -3.578627 | -0.133111 | 3.552590  |
| 69 | 1 | 0 | -2.325829 | 0.969119  | 4.221573  |
| 70 | 1 | 0 | -2.158452 | 0.342300  | 2.542326  |
| 71 | 6 | 0 | -1.696089 | 2.896310  | -0.099300 |
| 72 | 6 | 0 | -0.729553 | 4.077776  | -0.111241 |
| 73 | 1 | 0 | -1.105413 | 4.857199  | 0.558076  |
| 74 | 6 | 0 | -0.469204 | 4.682931  | -1.486613 |
| 75 | 1 | 0 | -1.366493 | 5.159086  | -1.889707 |
| 76 | 1 | 0 | -0.144654 | 3.898931  | -2.176263 |
| 77 | 6 | 0 | 0.657432  | 5.692842  | -1.186030 |
| 78 | 1 | 0 | 0.201441  | 6.646449  | -0.904259 |

|     |   |   |           |           |           |
|-----|---|---|-----------|-----------|-----------|
| 79  | 6 | 0 | 1.705019  | 5.877473  | -2.305246 |
| 80  | 1 | 0 | 1.273714  | 5.728346  | -3.301339 |
| 81  | 1 | 0 | 2.101508  | 6.899550  | -2.271419 |
| 82  | 6 | 0 | 2.819082  | 4.871451  | -1.969990 |
| 83  | 1 | 0 | 3.776019  | 5.130868  | -2.435231 |
| 84  | 1 | 0 | 2.538577  | 3.867808  | -2.304504 |
| 85  | 6 | 0 | 2.882050  | 4.898910  | -0.432477 |
| 86  | 1 | 0 | 3.350397  | 4.012719  | -0.003632 |
| 87  | 1 | 0 | 3.449370  | 5.777047  | -0.098585 |
| 88  | 6 | 0 | 1.431955  | 5.096401  | 0.031558  |
| 89  | 1 | 0 | 1.351396  | 5.716276  | 0.925676  |
| 90  | 6 | 0 | 0.651893  | 3.481424  | 1.876787  |
| 91  | 1 | 0 | 0.152538  | 4.337523  | 2.339633  |
| 92  | 1 | 0 | 0.029079  | 2.595076  | 1.992037  |
| 93  | 6 | 0 | 2.003693  | 3.274213  | 2.563198  |
| 94  | 1 | 0 | 1.794962  | 3.266380  | 3.639169  |
| 95  | 1 | 0 | 2.635287  | 4.155235  | 2.400743  |
| 96  | 6 | 0 | 2.873437  | 2.071090  | 2.191861  |
| 97  | 1 | 0 | 3.011746  | 2.028757  | 1.113524  |
| 98  | 1 | 0 | 3.846541  | 2.180727  | 2.679729  |
| 99  | 6 | 0 | 2.213363  | 0.516585  | 4.135088  |
| 100 | 1 | 0 | 2.938163  | 1.204009  | 4.573424  |
| 101 | 6 | 0 | 0.788110  | 0.727345  | 4.663113  |
| 102 | 1 | 0 | 0.210782  | 1.426443  | 4.057220  |
| 103 | 1 | 0 | 0.876827  | 1.146768  | 5.673255  |
| 104 | 6 | 0 | 0.164537  | -0.678577 | 4.730551  |
| 105 | 1 | 0 | -0.212974 | -0.954029 | 3.741708  |
| 106 | 1 | 0 | -0.666128 | -0.736806 | 5.442063  |
| 107 | 6 | 0 | 1.344409  | -1.583602 | 5.125501  |
| 108 | 1 | 0 | 1.188148  | -2.635886 | 4.862428  |
| 109 | 1 | 0 | 1.502156  | -1.539980 | 6.209949  |
| 110 | 6 | 0 | 2.568994  | -0.980001 | 4.403326  |
| 111 | 1 | 0 | 3.466346  | -1.040470 | 5.025851  |
| 112 | 6 | 0 | 2.896708  | -1.578245 | 3.019118  |
| 113 | 1 | 0 | 2.006871  | -1.976009 | 2.524476  |
| 114 | 1 | 0 | 3.655368  | -2.362884 | 3.070189  |
| 115 | 6 | 0 | 3.404673  | -0.354111 | 2.259536  |
| 116 | 1 | 0 | 4.323794  | -0.003206 | 2.738276  |
| 117 | 6 | 0 | 3.695308  | -0.557189 | 0.771180  |
| 118 | 6 | 0 | 5.389925  | -1.371843 | -0.742308 |
| 119 | 6 | 0 | 5.923544  | -0.368081 | -1.592171 |
| 120 | 6 | 0 | 6.341212  | -0.724945 | -2.887214 |
| 121 | 1 | 0 | 6.740158  | 0.018789  | -3.564221 |
| 122 | 6 | 0 | 6.257706  | -2.043091 | -3.324724 |

|     |    |   |          |           |           |
|-----|----|---|----------|-----------|-----------|
| 123 | 1  | 0 | 6.587873 | -2.301324 | -4.322819 |
| 124 | 6  | 0 | 5.755763 | -3.031692 | -2.484195 |
| 125 | 1  | 0 | 5.709813 | -4.047848 | -2.853337 |
| 126 | 6  | 0 | 5.315002 | -2.717907 | -1.185644 |
| 127 | 6  | 0 | 4.764684 | -3.823689 | -0.290082 |
| 128 | 1  | 0 | 4.441938 | -3.413021 | 0.688946  |
| 129 | 6  | 0 | 5.840587 | -4.871770 | 0.014610  |
| 130 | 1  | 0 | 5.451146 | -5.619315 | 0.738764  |
| 131 | 1  | 0 | 6.730261 | -4.384208 | 0.467936  |
| 132 | 1  | 0 | 6.156251 | -5.408621 | -0.904926 |
| 133 | 6  | 0 | 3.524253 | -4.475492 | -0.911364 |
| 134 | 1  | 0 | 2.766386 | -3.699852 | -1.146611 |
| 135 | 1  | 0 | 3.072460 | -5.196103 | -0.196441 |
| 136 | 1  | 0 | 3.776103 | -5.022796 | -1.843995 |
| 137 | 6  | 0 | 6.057460 | 1.080260  | -1.130063 |
| 138 | 1  | 0 | 5.731224 | 1.188277  | -0.074532 |
| 139 | 6  | 0 | 7.517978 | 1.546508  | -1.171184 |
| 140 | 1  | 0 | 8.156134 | 0.857906  | -0.576894 |
| 141 | 1  | 0 | 7.606405 | 2.562009  | -0.729058 |
| 142 | 1  | 0 | 7.904199 | 1.586196  | -2.211412 |
| 143 | 6  | 0 | 5.162244 | 2.007234  | -1.958796 |
| 144 | 1  | 0 | 5.466240 | 2.017462  | -3.026776 |
| 145 | 1  | 0 | 5.228018 | 3.044544  | -1.568206 |
| 146 | 1  | 0 | 4.104517 | 1.675443  | -1.890548 |
| 147 | 8  | 0 | 2.892450 | -0.334566 | -0.148016 |
| 148 | 20 | 0 | 0.619530 | 0.432851  | -0.305658 |

---

### L3a-Ca(II)-TS2-re

Zero-point correction= 1.25802 a.u.

Thermal correction to Gibbs Free Energy= 1.15590 a.u.

Sum of electronic and zero-point Energies= -6232.79671 a.u.

Sum of electronic and thermal Free Energies= -6232.89883 a.u.

The number of imaginary frequencies 1

Standard orientation

---

| Center<br>Number | Atomic<br>Number | Atomic<br>Type | Coordinates (Angstroms) |           |           |
|------------------|------------------|----------------|-------------------------|-----------|-----------|
|                  |                  |                | X                       | Y         | Z         |
| 1                | 6                | 0              | -0.799178               | -3.490653 | -1.502607 |
| 2                | 6                | 0              | -0.849300               | -4.235253 | -0.234926 |
| 3                | 8                | 0              | -1.770646               | -5.165427 | -0.174000 |
| 4                | 6                | 0              | -1.962536               | -5.926935 | 1.043369  |
| 5                | 6                | 0              | -0.120332               | -3.695652 | 0.846286  |

|    |    |   |           |           |           |
|----|----|---|-----------|-----------|-----------|
| 6  | 1  | 0 | 0.238104  | -3.287969 | -1.775963 |
| 7  | 1  | 0 | -1.311991 | -4.004644 | -2.315250 |
| 8  | 1  | 0 | -2.648963 | -6.727538 | 0.770313  |
| 9  | 1  | 0 | -2.411706 | -5.291022 | 1.807760  |
| 10 | 1  | 0 | -1.009923 | -6.337541 | 1.385240  |
| 11 | 1  | 0 | 0.904208  | -3.410843 | 0.603410  |
| 12 | 1  | 0 | -0.232923 | -4.132325 | 1.835278  |
| 13 | 1  | 0 | -0.634526 | -2.507440 | 0.671199  |
| 14 | 6  | 0 | -1.004931 | -1.238254 | -2.498553 |
| 15 | 6  | 0 | -1.480573 | -2.009619 | -1.245346 |
| 16 | 6  | 0 | -2.976764 | -2.105270 | -1.516192 |
| 17 | 6  | 0 | -3.194007 | -1.742160 | -2.857851 |
| 18 | 7  | 0 | -1.985069 | -1.268769 | -3.430783 |
| 19 | 8  | 0 | -1.039247 | -1.442249 | -0.090337 |
| 20 | 8  | 0 | 0.103815  | -0.693878 | -2.591312 |
| 21 | 6  | 0 | -1.853167 | -0.762910 | -4.790378 |
| 22 | 6  | 0 | -4.069672 | -2.467646 | -0.751172 |
| 23 | 6  | 0 | -4.443695 | -1.794571 | -3.457888 |
| 24 | 1  | 0 | -1.992023 | -1.579227 | -5.506036 |
| 25 | 1  | 0 | -0.851462 | -0.347362 | -4.901983 |
| 26 | 1  | 0 | -2.595167 | 0.015179  | -4.988128 |
| 27 | 6  | 0 | -5.521679 | -2.205522 | -2.662003 |
| 28 | 6  | 0 | -5.349933 | -2.528489 | -1.316768 |
| 29 | 1  | 0 | -4.590844 | -1.512989 | -4.494832 |
| 30 | 1  | 0 | -6.516072 | -2.254897 | -3.095247 |
| 31 | 1  | 0 | -6.199979 | -2.814204 | -0.707339 |
| 32 | 35 | 0 | -3.878214 | -2.830493 | 1.118894  |
| 33 | 8  | 0 | 1.278429  | 2.606212  | -0.220908 |
| 34 | 8  | 0 | -1.384400 | 1.680927  | -0.369442 |
| 35 | 8  | 0 | 1.135913  | 0.240464  | 1.971647  |
| 36 | 7  | 0 | -2.910276 | 3.188811  | 0.386349  |
| 37 | 1  | 0 | -3.096355 | 4.127798  | 0.718029  |
| 38 | 7  | 0 | 0.736782  | 3.640745  | 0.496361  |
| 39 | 7  | 0 | 4.953580  | -1.111592 | 0.534752  |
| 40 | 1  | 0 | 5.624785  | -1.155964 | 1.292813  |
| 41 | 7  | 0 | 2.325388  | 0.487693  | 2.608910  |
| 42 | 6  | 0 | -3.991944 | 2.279716  | 0.340078  |
| 43 | 6  | 0 | -4.352742 | 1.551196  | 1.502385  |
| 44 | 6  | 0 | -5.410232 | 0.626922  | 1.425022  |
| 45 | 1  | 0 | -5.707817 | 0.052888  | 2.292411  |
| 46 | 6  | 0 | -6.094401 | 0.425502  | 0.230559  |
| 47 | 1  | 0 | -6.903030 | -0.292515 | 0.187590  |
| 48 | 6  | 0 | -5.745185 | 1.143720  | -0.908529 |
| 49 | 1  | 0 | -6.295090 | 0.960766  | -1.822112 |



|    |   |   |           |           |           |
|----|---|---|-----------|-----------|-----------|
| 50 | 6 | 0 | -4.707272 | 2.092193  | -0.870883 |
| 51 | 6 | 0 | -4.374970 | 2.896400  | -2.123356 |
| 52 | 1 | 0 | -3.589609 | 3.650441  | -1.908975 |
| 53 | 6 | 0 | -3.818560 | 1.987709  | -3.221941 |
| 54 | 1 | 0 | -2.926038 | 1.445588  | -2.844312 |
| 55 | 1 | 0 | -3.505261 | 2.594468  | -4.098276 |
| 56 | 1 | 0 | -4.578117 | 1.250703  | -3.557517 |
| 57 | 6 | 0 | -5.591445 | 3.685204  | -2.623198 |
| 58 | 1 | 0 | -5.294782 | 4.352676  | -3.460568 |
| 59 | 1 | 0 | -5.996678 | 4.320151  | -1.806355 |
| 60 | 1 | 0 | -6.395080 | 3.010705  | -2.986532 |
| 61 | 6 | 0 | -3.620547 | 1.748374  | 2.825692  |
| 62 | 1 | 0 | -2.827921 | 2.519184  | 2.725851  |
| 63 | 6 | 0 | -4.573465 | 2.250924  | 3.916997  |
| 64 | 1 | 0 | -5.088000 | 3.176038  | 3.579441  |
| 65 | 1 | 0 | -4.002882 | 2.492864  | 4.839424  |
| 66 | 1 | 0 | -5.338894 | 1.487632  | 4.172028  |
| 67 | 6 | 0 | -2.916789 | 0.460277  | 3.264521  |
| 68 | 1 | 0 | -3.644826 | -0.353046 | 3.466245  |
| 69 | 1 | 0 | -2.341310 | 0.645957  | 4.195215  |
| 70 | 1 | 0 | -2.209854 | 0.124531  | 2.476543  |
| 71 | 6 | 0 | -1.666811 | 2.828466  | 0.003140  |
| 72 | 6 | 0 | -0.676696 | 3.990769  | 0.005278  |
| 73 | 1 | 0 | -1.036561 | 4.764941  | 0.688930  |
| 74 | 6 | 0 | -0.403061 | 4.617985  | -1.357586 |
| 75 | 1 | 0 | -1.289729 | 5.121600  | -1.750262 |
| 76 | 1 | 0 | -0.095185 | 3.842247  | -2.063635 |
| 77 | 6 | 0 | 0.745218  | 5.597993  | -1.036174 |
| 78 | 1 | 0 | 0.309889  | 6.559298  | -0.747808 |
| 79 | 6 | 0 | 1.808066  | 5.771582  | -2.144115 |
| 80 | 1 | 0 | 1.385421  | 5.630326  | -3.144964 |
| 81 | 1 | 0 | 2.216456  | 6.788624  | -2.103861 |
| 82 | 6 | 0 | 2.907161  | 4.751301  | -1.801254 |
| 83 | 1 | 0 | 3.873389  | 5.002611  | -2.251715 |
| 84 | 1 | 0 | 2.619642  | 3.753183  | -2.145221 |
| 85 | 6 | 0 | 2.949404  | 4.768054  | -0.262999 |
| 86 | 1 | 0 | 3.406490  | 3.877352  | 0.168457  |
| 87 | 1 | 0 | 3.517203  | 5.640310  | 0.084886  |
| 88 | 6 | 0 | 1.495075  | 4.971772  | 0.182479  |
| 89 | 1 | 0 | 1.405284  | 5.574021  | 1.087773  |
| 90 | 6 | 0 | 0.682921  | 3.313926  | 1.978307  |
| 91 | 1 | 0 | 0.192171  | 4.162777  | 2.462626  |
| 92 | 1 | 0 | 0.046751  | 2.433769  | 2.061739  |
| 93 | 6 | 0 | 2.024085  | 3.064154  | 2.669580  |

|     |   |   |           |           |           |
|-----|---|---|-----------|-----------|-----------|
| 94  | 1 | 0 | 1.804054  | 3.020726  | 3.742451  |
| 95  | 1 | 0 | 2.671690  | 3.939632  | 2.545070  |
| 96  | 6 | 0 | 2.875432  | 1.860291  | 2.263122  |
| 97  | 1 | 0 | 3.019338  | 1.852869  | 1.184446  |
| 98  | 1 | 0 | 3.847641  | 1.935282  | 2.758588  |
| 99  | 6 | 0 | 2.169967  | 0.252685  | 4.147319  |
| 100 | 1 | 0 | 2.893034  | 0.921392  | 4.616214  |
| 101 | 6 | 0 | 0.739566  | 0.454832  | 4.664196  |
| 102 | 1 | 0 | 0.172667  | 1.173464  | 4.071379  |
| 103 | 1 | 0 | 0.817718  | 0.845477  | 5.686722  |
| 104 | 6 | 0 | 0.110322  | -0.950158 | 4.685203  |
| 105 | 1 | 0 | -0.256703 | -1.196890 | 3.684417  |
| 106 | 1 | 0 | -0.728642 | -1.025678 | 5.385218  |
| 107 | 6 | 0 | 1.282099  | -1.870098 | 5.068143  |
| 108 | 1 | 0 | 1.123892  | -2.915064 | 4.778314  |
| 109 | 1 | 0 | 1.430235  | -1.853493 | 6.154688  |
| 110 | 6 | 0 | 2.514873  | -1.253970 | 4.372146  |
| 111 | 1 | 0 | 3.408572  | -1.339764 | 4.996845  |
| 112 | 6 | 0 | 2.845410  | -1.811054 | 2.971654  |
| 113 | 1 | 0 | 1.952558  | -2.175283 | 2.456789  |
| 114 | 1 | 0 | 3.591199  | -2.609099 | 2.999923  |
| 115 | 6 | 0 | 3.379662  | -0.569509 | 2.261818  |
| 116 | 1 | 0 | 4.293220  | -0.243064 | 2.768505  |
| 117 | 6 | 0 | 3.683766  | -0.720414 | 0.771748  |
| 118 | 6 | 0 | 5.434948  | -1.309211 | -0.779841 |
| 119 | 6 | 0 | 6.083365  | -0.246782 | -1.462113 |
| 120 | 6 | 0 | 6.533193  | -0.457477 | -2.778291 |
| 121 | 1 | 0 | 7.025267  | 0.333942  | -3.328061 |
| 122 | 6 | 0 | 6.351575  | -1.686036 | -3.405357 |
| 123 | 1 | 0 | 6.701258  | -1.830161 | -4.419619 |
| 124 | 6 | 0 | 5.720872  | -2.729704 | -2.735607 |
| 125 | 1 | 0 | 5.592117  | -3.671144 | -3.253104 |
| 126 | 6 | 0 | 5.256098  | -2.563994 | -1.418275 |
| 127 | 6 | 0 | 4.559878  | -3.725198 | -0.715362 |
| 128 | 1 | 0 | 4.274645  | -3.444536 | 0.319796  |
| 129 | 6 | 0 | 5.487816  | -4.939126 | -0.587692 |
| 130 | 1 | 0 | 4.995578  | -5.733815 | 0.013027  |
| 131 | 1 | 0 | 6.426298  | -4.649335 | -0.068441 |
| 132 | 1 | 0 | 5.743997  | -5.362908 | -1.581533 |
| 133 | 6 | 0 | 3.261165  | -4.098267 | -1.437717 |
| 134 | 1 | 0 | 2.624661  | -3.196479 | -1.553077 |
| 135 | 1 | 0 | 2.696943  | -4.852746 | -0.848706 |
| 136 | 1 | 0 | 3.464330  | -4.520178 | -2.444781 |
| 137 | 6 | 0 | 6.287997  | 1.115445  | -0.806087 |

|     |    |   |          |           |           |
|-----|----|---|----------|-----------|-----------|
| 138 | 1  | 0 | 5.894041 | 1.115720  | 0.231663  |
| 139 | 6  | 0 | 7.777625 | 1.462549  | -0.698767 |
| 140 | 1  | 0 | 8.320012 | 0.655054  | -0.161885 |
| 141 | 1  | 0 | 7.909316 | 2.404556  | -0.124222 |
| 142 | 1  | 0 | 8.237535 | 1.598541  | -1.700306 |
| 143 | 6  | 0 | 5.521743 | 2.209411  | -1.557843 |
| 144 | 1  | 0 | 5.913714 | 2.346465  | -2.587560 |
| 145 | 1  | 0 | 5.614177 | 3.176188  | -1.018726 |
| 146 | 1  | 0 | 4.444675 | 1.944852  | -1.618131 |
| 147 | 8  | 0 | 2.854271 | -0.552935 | -0.134955 |
| 148 | 20 | 0 | 0.622644 | 0.341898  | -0.323617 |

---

### L3a-Ca(II)-TS1-si-H

Zero-point correction= 1.27060 a.u.

Thermal correction to Gibbs Free Energy= 1.17109 a.u.

Sum of electronic and zero-point Energies= -3659.24613 a.u.

Sum of electronic and thermal Free Energies= -3659.34564 a.u.

The number of imaginary frequencies 1

Standard orientation

---

| Center<br>Number | Atomic<br>Number | Atomic<br>Type | Coordinates (Angstroms) |          |           |
|------------------|------------------|----------------|-------------------------|----------|-----------|
|                  |                  |                | X                       | Y        | Z         |
| 1                | 6                | 0              | -1.135407               | 1.929568 | -1.583918 |
| 2                | 6                | 0              | -0.897924               | 2.528446 | -0.172619 |
| 3                | 6                | 0              | -1.975995               | 3.572505 | -0.075692 |
| 4                | 6                | 0              | -2.647927               | 3.609343 | -1.310346 |
| 5                | 7                | 0              | -2.109637               | 2.638172 | -2.196973 |
| 6                | 8                | 0              | -0.619422               | 1.681780 | 0.761364  |
| 7                | 6                | 0              | -2.386976               | 4.392838 | 0.964816  |
| 8                | 6                | 0              | -3.714941               | 4.465611 | -1.541484 |
| 9                | 8                | 0              | -0.548742               | 0.925537 | -2.011938 |
| 10               | 6                | 0              | -2.613441               | 2.363906 | -3.534601 |
| 11               | 1                | 0              | -2.433467               | 3.220961 | -4.191212 |
| 12               | 1                | 0              | -2.086412               | 1.491795 | -3.922790 |
| 13               | 1                | 0              | -3.686755               | 2.157957 | -3.501411 |
| 14               | 6                | 0              | -3.468854               | 5.260621 | 0.753602  |
| 15               | 6                | 0              | -4.115035               | 5.297021 | -0.483897 |
| 16               | 1                | 0              | -3.809001               | 5.905010 | 1.558869  |
| 17               | 1                | 0              | -4.951438               | 5.973483 | -0.634724 |
| 18               | 1                | 0              | -4.234929               | 4.488124 | -2.493545 |
| 19               | 6                | 0              | 0.666918                | 3.523108 | -0.697622 |
| 20               | 6                | 0              | 1.182884                | 4.036827 | 0.512257  |

|    |   |   |           |           |           |
|----|---|---|-----------|-----------|-----------|
| 21 | 8 | 0 | 0.859105  | 5.270593  | 0.809169  |
| 22 | 6 | 0 | 1.199922  | 5.861968  | 2.089956  |
| 23 | 1 | 0 | 0.750667  | 6.853885  | 2.066009  |
| 24 | 6 | 0 | 1.872348  | 3.133129  | 1.459024  |
| 25 | 1 | 0 | 0.778335  | 5.274049  | 2.907619  |
| 26 | 1 | 0 | 1.061044  | 2.510910  | 1.889477  |
| 27 | 1 | 0 | 1.249230  | 2.707520  | -1.116094 |
| 28 | 1 | 0 | 0.321234  | 4.258291  | -1.420423 |
| 29 | 1 | 0 | 2.518305  | 2.439550  | 0.916540  |
| 30 | 1 | 0 | 2.285139  | 5.941985  | 2.185621  |
| 31 | 1 | 0 | 2.422289  | 3.633656  | 2.255946  |
| 32 | 8 | 0 | 2.500886  | -0.102661 | -0.228325 |
| 33 | 8 | 0 | 0.960423  | -2.074695 | -1.540164 |
| 34 | 8 | 0 | 0.011703  | -2.071070 | 1.651812  |
| 35 | 8 | 0 | -2.042458 | -1.285316 | -0.102724 |
| 36 | 7 | 0 | 4.741187  | -0.422506 | -0.366257 |
| 37 | 1 | 0 | 5.509553  | -0.931171 | -0.788862 |
| 38 | 7 | 0 | 2.102207  | -2.823527 | -1.424937 |
| 39 | 7 | 0 | -4.104370 | -1.816704 | 0.670850  |
| 40 | 1 | 0 | -4.645169 | -2.316708 | 1.368162  |
| 41 | 7 | 0 | -0.721912 | -3.233495 | 1.609765  |
| 42 | 6 | 0 | 5.039657  | 0.777673  | 0.321071  |
| 43 | 6 | 0 | 4.944168  | 0.824472  | 1.736999  |
| 44 | 6 | 0 | 5.173518  | 2.046534  | 2.394939  |
| 45 | 1 | 0 | 5.096177  | 2.118319  | 3.471741  |
| 46 | 6 | 0 | 5.495538  | 3.193207  | 1.675958  |
| 47 | 1 | 0 | 5.662434  | 4.126864  | 2.197632  |
| 48 | 6 | 0 | 5.601153  | 3.146281  | 0.289672  |
| 49 | 1 | 0 | 5.849184  | 4.057118  | -0.238904 |
| 50 | 6 | 0 | 5.382293  | 1.945645  | -0.409968 |
| 51 | 6 | 0 | 5.491455  | 1.932800  | -1.931712 |
| 52 | 1 | 0 | 5.316196  | 0.912612  | -2.329736 |
| 53 | 6 | 0 | 4.425787  | 2.831359  | -2.568397 |
| 54 | 1 | 0 | 3.414283  | 2.506823  | -2.245954 |
| 55 | 1 | 0 | 4.470939  | 2.753393  | -3.675877 |
| 56 | 1 | 0 | 4.568718  | 3.895515  | -2.285107 |
| 57 | 6 | 0 | 6.897925  | 2.335390  | -2.391521 |
| 58 | 1 | 0 | 6.989438  | 2.213216  | -3.492198 |
| 59 | 1 | 0 | 7.657929  | 1.683230  | -1.910193 |
| 60 | 1 | 0 | 7.121399  | 3.393657  | -2.140051 |
| 61 | 6 | 0 | 4.594908  | -0.415421 | 2.554674  |
| 62 | 1 | 0 | 4.494731  | -1.303866 | 1.897166  |
| 63 | 6 | 0 | 5.705956  | -0.753860 | 3.556132  |
| 64 | 1 | 0 | 6.679299  | -0.851518 | 3.029178  |

|     |   |   |           |           |           |
|-----|---|---|-----------|-----------|-----------|
| 65  | 1 | 0 | 5.487934  | -1.722940 | 4.054254  |
| 66  | 1 | 0 | 5.798894  | 0.026098  | 4.340894  |
| 67  | 6 | 0 | 3.248177  | -0.244147 | 3.266548  |
| 68  | 1 | 0 | 3.275545  | 0.597033  | 3.991022  |
| 69  | 1 | 0 | 2.992821  | -1.172326 | 3.819289  |
| 70  | 1 | 0 | 2.443638  | -0.052158 | 2.525439  |
| 71  | 6 | 0 | 3.466567  | -0.752052 | -0.661285 |
| 72  | 6 | 0 | 3.356527  | -1.954003 | -1.597931 |
| 73  | 1 | 0 | 4.208087  | -2.614787 | -1.410513 |
| 74  | 6 | 0 | 3.307571  | -1.605941 | -3.084888 |
| 75  | 1 | 0 | 4.252200  | -1.176878 | -3.427435 |
| 76  | 1 | 0 | 2.504682  | -0.886348 | -3.265016 |
| 77  | 6 | 0 | 3.009479  | -2.974893 | -3.731844 |
| 78  | 1 | 0 | 3.960353  | -3.469522 | -3.950804 |
| 79  | 6 | 0 | 2.094288  | -2.940067 | -4.976825 |
| 80  | 1 | 0 | 2.197304  | -2.003833 | -5.536502 |
| 81  | 1 | 0 | 2.369230  | -3.756794 | -5.655146 |
| 82  | 6 | 0 | 0.673600  | -3.168049 | -4.431634 |
| 83  | 1 | 0 | -0.015761 | -3.545374 | -5.194641 |
| 84  | 1 | 0 | 0.263560  | -2.236330 | -4.030684 |
| 85  | 6 | 0 | 0.882876  | -4.167099 | -3.280531 |
| 86  | 1 | 0 | 0.059350  | -4.175594 | -2.566616 |
| 87  | 1 | 0 | 0.992680  | -5.183144 | -3.681046 |
| 88  | 6 | 0 | 2.230630  | -3.786405 | -2.649536 |
| 89  | 1 | 0 | 2.792029  | -4.647482 | -2.283464 |
| 90  | 6 | 0 | 2.152340  | -3.541880 | -0.087894 |
| 91  | 1 | 0 | 3.102694  | -4.083580 | -0.063965 |
| 92  | 1 | 0 | 2.168296  | -2.758603 | 0.669376  |
| 93  | 6 | 0 | 1.017166  | -4.532392 | 0.186095  |
| 94  | 1 | 0 | 1.322628  | -5.094356 | 1.075689  |
| 95  | 1 | 0 | 0.981047  | -5.272672 | -0.620976 |
| 96  | 6 | 0 | -0.424078 | -4.038318 | 0.355576  |
| 97  | 1 | 0 | -0.713390 | -3.404218 | -0.478842 |
| 98  | 1 | 0 | -1.084233 | -4.909710 | 0.392774  |
| 99  | 6 | 0 | -0.488437 | -4.063191 | 2.915372  |
| 100 | 1 | 0 | -0.596187 | -5.106626 | 2.616284  |
| 101 | 6 | 0 | 0.853971  | -3.770030 | 3.600567  |
| 102 | 1 | 0 | 1.625176  | -3.445186 | 2.901693  |
| 103 | 1 | 0 | 1.190079  | -4.703961 | 4.068377  |
| 104 | 6 | 0 | 0.536864  | -2.725051 | 4.685118  |
| 105 | 1 | 0 | 0.508427  | -1.728713 | 4.232251  |
| 106 | 1 | 0 | 1.280428  | -2.713137 | 5.489241  |
| 107 | 6 | 0 | -0.863928 | -3.126452 | 5.177253  |
| 108 | 1 | 0 | -1.397832 | -2.310345 | 5.676565  |

|     |    |   |           |           |           |
|-----|----|---|-----------|-----------|-----------|
| 109 | 1  | 0 | -0.785970 | -3.951727 | 5.895271  |
| 110 | 6  | 0 | -1.600699 | -3.612961 | 3.909625  |
| 111 | 1  | 0 | -2.263022 | -4.454971 | 4.131380  |
| 112 | 6  | 0 | -2.407865 | -2.536972 | 3.159103  |
| 113 | 1  | 0 | -1.998134 | -1.534801 | 3.315598  |
| 114 | 1  | 0 | -3.461173 | -2.533958 | 3.449380  |
| 115 | 6  | 0 | -2.227863 | -2.941530 | 1.694864  |
| 116 | 1  | 0 | -2.735377 | -3.896874 | 1.519434  |
| 117 | 6  | 0 | -2.756596 | -1.933151 | 0.673414  |
| 118 | 6  | 0 | -4.730463 | -0.745008 | -0.013053 |
| 119 | 6  | 0 | -4.893751 | -0.799190 | -1.424686 |
| 120 | 6  | 0 | -5.470693 | 0.299792  | -2.086448 |
| 121 | 1  | 0 | -5.606665 | 0.289650  | -3.159762 |
| 122 | 6  | 0 | -5.875157 | 1.426638  | -1.379756 |
| 123 | 1  | 0 | -6.310273 | 2.265815  | -1.907101 |
| 124 | 6  | 0 | -5.721675 | 1.481288  | 0.000848  |
| 125 | 1  | 0 | -6.042633 | 2.375702  | 0.518346  |
| 126 | 6  | 0 | -5.155040 | 0.404799  | 0.707698  |
| 127 | 6  | 0 | -4.987483 | 0.513636  | 2.220876  |
| 128 | 1  | 0 | -4.543365 | -0.411623 | 2.637085  |
| 129 | 6  | 0 | -6.341500 | 0.689621  | 2.918259  |
| 130 | 1  | 0 | -6.209637 | 0.655441  | 4.021050  |
| 131 | 1  | 0 | -7.029915 | -0.133477 | 2.629740  |
| 132 | 1  | 0 | -6.812233 | 1.660096  | 2.654480  |
| 133 | 6  | 0 | -4.028614 | 1.650055  | 2.591796  |
| 134 | 1  | 0 | -3.048334 | 1.495592  | 2.094430  |
| 135 | 1  | 0 | -3.855428 | 1.661169  | 3.689225  |
| 136 | 1  | 0 | -4.437657 | 2.638071  | 2.293943  |
| 137 | 6  | 0 | -4.469542 | -2.019882 | -2.237010 |
| 138 | 1  | 0 | -4.050577 | -2.805854 | -1.575551 |
| 139 | 6  | 0 | -5.671008 | -2.659169 | -2.943408 |
| 140 | 1  | 0 | -6.461665 | -2.907434 | -2.203048 |
| 141 | 1  | 0 | -5.361750 | -3.601977 | -3.443621 |
| 142 | 1  | 0 | -6.099453 | -1.982059 | -3.712077 |
| 143 | 6  | 0 | -3.369265 | -1.660488 | -3.244945 |
| 144 | 1  | 0 | -3.745379 | -0.965765 | -4.025340 |
| 145 | 1  | 0 | -2.995577 | -2.579240 | -3.745812 |
| 146 | 1  | 0 | -2.511424 | -1.182622 | -2.727094 |
| 147 | 20 | 0 | 0.160329  | -0.460050 | -0.055846 |
| 148 | 1  | 0 | -1.890235 | 4.352831  | 1.929963  |

---

**L3a-Ca(II)-TS2-si-H**

Zero-point correction= 1.26765 a.u.

Thermal correction to Gibbs Free Energy= 1.16846 a.u.

Sum of electronic and zero-point Energies= -3659.24686 a.u.

Sum of electronic and thermal Free Energies= -3659.34605 a.u.

The number of imaginary frequencies 1

Standard orientation

---

| Center<br>Number | Atomic<br>Number | Atomic<br>Type | Coordinates (Angstroms) |           |           |
|------------------|------------------|----------------|-------------------------|-----------|-----------|
|                  |                  |                | X                       | Y         | Z         |
| 1                | 6                | 0              | -0.986439               | 2.042565  | -1.593470 |
| 2                | 6                | 0              | -0.507927               | 2.786233  | -0.322253 |
| 3                | 6                | 0              | -1.596768               | 3.834602  | -0.161255 |
| 4                | 6                | 0              | -2.434178               | 3.772139  | -1.285284 |
| 5                | 7                | 0              | -2.024866               | 2.711791  | -2.138516 |
| 6                | 8                | 0              | -0.312796               | 1.896796  | 0.706506  |
| 7                | 6                | 0              | -1.861254               | 4.750052  | 0.845873  |
| 8                | 6                | 0              | -3.522737               | 4.618012  | -1.448068 |
| 9                | 8                | 0              | -0.489062               | 0.979101  | -1.993301 |
| 10               | 6                | 0              | -2.694417               | 2.333808  | -3.374051 |
| 11               | 1                | 0              | -2.517377               | 3.089547  | -4.146026 |
| 12               | 1                | 0              | -2.292547               | 1.375087  | -3.702783 |
| 13               | 1                | 0              | -3.770236               | 2.241694  | -3.207648 |
| 14               | 6                | 0              | -2.963058               | 5.608899  | 0.708640  |
| 15               | 6                | 0              | -3.774985               | 5.544538  | -0.425490 |
| 16               | 1                | 0              | -3.186909               | 6.326032  | 1.492906  |
| 17               | 1                | 0              | -4.623244               | 6.216514  | -0.519728 |
| 18               | 1                | 0              | -4.164067               | 4.562197  | -2.321619 |
| 19               | 6                | 0              | 0.896652                | 3.480945  | -0.788783 |
| 20               | 6                | 0              | 1.602314                | 3.913230  | 0.430195  |
| 21               | 8                | 0              | 1.524592                | 5.194000  | 0.699004  |
| 22               | 6                | 0              | 2.090269                | 5.713088  | 1.929389  |
| 23               | 1                | 0              | 2.017388                | 6.796127  | 1.839370  |
| 24               | 6                | 0              | 2.016133                | 2.897161  | 1.317604  |
| 25               | 1                | 0              | 1.507973                | 5.364052  | 2.785357  |
| 26               | 1                | 0              | 0.834659                | 2.357777  | 1.321628  |
| 27               | 1                | 0              | 1.462877                | 2.689021  | -1.284356 |
| 28               | 1                | 0              | 0.698647                | 4.301310  | -1.478887 |
| 29               | 1                | 0              | 2.511057                | 2.052472  | 0.835804  |
| 30               | 1                | 0              | 3.135185                | 5.407007  | 2.021792  |
| 31               | 1                | 0              | 2.422284                | 3.166169  | 2.288987  |
| 32               | 8                | 0              | 2.464713                | -0.233585 | -0.255672 |
| 33               | 8                | 0              | 0.762179                | -2.130716 | -1.464981 |
| 34               | 8                | 0              | -0.073958               | -1.986179 | 1.726210  |
| 35               | 8                | 0              | -2.144786               | -1.120912 | -0.014942 |

|    |   |   |           |           |           |
|----|---|---|-----------|-----------|-----------|
| 36 | 7 | 0 | 4.674997  | -0.707835 | -0.443076 |
| 37 | 1 | 0 | 5.394508  | -1.281551 | -0.868547 |
| 38 | 7 | 0 | 1.855357  | -2.950877 | -1.365066 |
| 39 | 7 | 0 | -4.210928 | -1.571567 | 0.801729  |
| 40 | 1 | 0 | -4.755742 | -2.013948 | 1.533872  |
| 41 | 7 | 0 | -0.887177 | -3.094720 | 1.746828  |
| 42 | 6 | 0 | 5.074557  | 0.487606  | 0.199668  |
| 43 | 6 | 0 | 5.010515  | 0.585521  | 1.614809  |
| 44 | 6 | 0 | 5.331323  | 1.810551  | 2.227534  |
| 45 | 1 | 0 | 5.280639  | 1.921396  | 3.302626  |
| 46 | 6 | 0 | 5.713605  | 2.909745  | 1.465563  |
| 47 | 1 | 0 | 5.951562  | 3.846549  | 1.952927  |
| 48 | 6 | 0 | 5.793327  | 2.810354  | 0.080390  |
| 49 | 1 | 0 | 6.094201  | 3.684211  | -0.482174 |
| 50 | 6 | 0 | 5.485012  | 1.604421  | -0.574894 |
| 51 | 6 | 0 | 5.578047  | 1.531137  | -2.096065 |
| 52 | 1 | 0 | 5.328430  | 0.512451  | -2.456163 |
| 53 | 6 | 0 | 4.571950  | 2.478833  | -2.757375 |
| 54 | 1 | 0 | 3.543649  | 2.234619  | -2.418629 |
| 55 | 1 | 0 | 4.603171  | 2.360781  | -3.861660 |
| 56 | 1 | 0 | 4.789151  | 3.539667  | -2.511207 |
| 57 | 6 | 0 | 7.004766  | 1.817883  | -2.579837 |
| 58 | 1 | 0 | 7.076737  | 1.650515  | -3.676020 |
| 59 | 1 | 0 | 7.722011  | 1.131408  | -2.080711 |
| 60 | 1 | 0 | 7.303749  | 2.866152  | -2.367866 |
| 61 | 6 | 0 | 4.602696  | -0.603523 | 2.479555  |
| 62 | 1 | 0 | 4.426821  | -1.502524 | 1.852869  |
| 63 | 6 | 0 | 5.716854  | -0.984551 | 3.462168  |
| 64 | 1 | 0 | 6.666091  | -1.164140 | 2.913393  |
| 65 | 1 | 0 | 5.449094  | -1.920543 | 3.998048  |
| 66 | 1 | 0 | 5.883711  | -0.188043 | 4.217507  |
| 67 | 6 | 0 | 3.290343  | -0.323625 | 3.220507  |
| 68 | 1 | 0 | 3.392237  | 0.533901  | 3.918557  |
| 69 | 1 | 0 | 2.992088  | -1.217124 | 3.807923  |
| 70 | 1 | 0 | 2.478817  | -0.101665 | 2.495596  |
| 71 | 6 | 0 | 3.373527  | -0.956904 | -0.696084 |
| 72 | 6 | 0 | 3.157768  | -2.171395 | -1.597370 |
| 73 | 1 | 0 | 3.970087  | -2.882095 | -1.416539 |
| 74 | 6 | 0 | 3.087716  | -1.858996 | -3.091290 |
| 75 | 1 | 0 | 4.047643  | -1.502283 | -3.472094 |
| 76 | 1 | 0 | 2.328401  | -1.093052 | -3.269394 |
| 77 | 6 | 0 | 2.682019  | -3.221780 | -3.691670 |
| 78 | 1 | 0 | 3.591702  | -3.784937 | -3.919937 |
| 79 | 6 | 0 | 1.737475  | -3.158332 | -4.913191 |



|     |   |   |           |           |           |
|-----|---|---|-----------|-----------|-----------|
| 80  | 1 | 0 | 1.889694  | -2.248238 | -5.503720 |
| 81  | 1 | 0 | 1.935810  | -4.011687 | -5.572913 |
| 82  | 6 | 0 | 0.320412  | -3.270178 | -4.324192 |
| 83  | 1 | 0 | -0.415722 | -3.617268 | -5.057314 |
| 84  | 1 | 0 | -0.010835 | -2.300988 | -3.939315 |
| 85  | 6 | 0 | 0.492112  | -4.250889 | -3.151463 |
| 86  | 1 | 0 | -0.309486 | -4.183874 | -2.416026 |
| 87  | 1 | 0 | 0.520019  | -5.281904 | -3.526794 |
| 88  | 6 | 0 | 1.880142  | -3.949529 | -2.567172 |
| 89  | 1 | 0 | 2.390018  | -4.839042 | -2.194718 |
| 90  | 6 | 0 | 1.905502  | -3.639060 | -0.012120 |
| 91  | 1 | 0 | 2.821146  | -4.238072 | -0.004468 |
| 92  | 1 | 0 | 1.992942  | -2.840197 | 0.723213  |
| 93  | 6 | 0 | 0.721901  | -4.550106 | 0.323154  |
| 94  | 1 | 0 | 1.018034  | -5.104057 | 1.221016  |
| 95  | 1 | 0 | 0.616776  | -5.308525 | -0.460813 |
| 96  | 6 | 0 | -0.679481 | -3.961948 | 0.516660  |
| 97  | 1 | 0 | -0.954067 | -3.339392 | -0.331551 |
| 98  | 1 | 0 | -1.391249 | -4.787794 | 0.605593  |
| 99  | 6 | 0 | -0.680726 | -3.887399 | 3.080230  |
| 100 | 1 | 0 | -0.867786 | -4.931526 | 2.826346  |
| 101 | 6 | 0 | 0.694414  | -3.661973 | 3.724596  |
| 102 | 1 | 0 | 1.467907  | -3.417324 | 2.996308  |
| 103 | 1 | 0 | 0.977936  | -4.598776 | 4.220731  |
| 104 | 6 | 0 | 0.475366  | -2.558055 | 4.774535  |
| 105 | 1 | 0 | 0.504658  | -1.579340 | 4.284837  |
| 106 | 1 | 0 | 1.236663  | -2.568207 | 5.561908  |
| 107 | 6 | 0 | -0.937952 | -2.841500 | 5.310591  |
| 108 | 1 | 0 | -1.401575 | -1.972094 | 5.789965  |
| 109 | 1 | 0 | -0.901143 | -3.643937 | 6.057268  |
| 110 | 6 | 0 | -1.735945 | -3.319804 | 4.077972  |
| 111 | 1 | 0 | -2.452487 | -4.102297 | 4.345000  |
| 112 | 6 | 0 | -2.480853 | -2.217705 | 3.300427  |
| 113 | 1 | 0 | -1.993607 | -1.243567 | 3.402496  |
| 114 | 1 | 0 | -3.524025 | -2.122143 | 3.611862  |
| 115 | 6 | 0 | -2.365919 | -2.700203 | 1.854117  |
| 116 | 1 | 0 | -2.935507 | -3.629312 | 1.741029  |
| 117 | 6 | 0 | -2.868219 | -1.718107 | 0.794652  |
| 118 | 6 | 0 | -4.833685 | -0.560479 | 0.030568  |
| 119 | 6 | 0 | -5.073149 | -0.769304 | -1.354528 |
| 120 | 6 | 0 | -5.665098 | 0.262000  | -2.105798 |
| 121 | 1 | 0 | -5.855641 | 0.136512  | -3.163467 |
| 122 | 6 | 0 | -6.013728 | 1.469433  | -1.509521 |
| 123 | 1 | 0 | -6.462994 | 2.254300  | -2.104343 |

|     |    |   |           |           |           |
|-----|----|---|-----------|-----------|-----------|
| 124 | 6  | 0 | -5.775427 | 1.678107  | -0.155723 |
| 125 | 1  | 0 | -6.046311 | 2.634033  | 0.272875  |
| 126 | 6  | 0 | -5.186587 | 0.675440  | 0.635842  |
| 127 | 6  | 0 | -4.912550 | 0.952916  | 2.110929  |
| 128 | 1  | 0 | -4.459622 | 0.068103  | 2.601256  |
| 129 | 6  | 0 | -6.210399 | 1.248997  | 2.871843  |
| 130 | 1  | 0 | -6.002646 | 1.338798  | 3.959721  |
| 131 | 1  | 0 | -6.935184 | 0.419054  | 2.728429  |
| 132 | 1  | 0 | -6.676698 | 2.196301  | 2.527987  |
| 133 | 6  | 0 | -3.905673 | 2.096524  | 2.277058  |
| 134 | 1  | 0 | -2.970023 | 1.858899  | 1.728558  |
| 135 | 1  | 0 | -3.647905 | 2.228069  | 3.349768  |
| 136 | 1  | 0 | -4.316171 | 3.055152  | 1.896505  |
| 137 | 6  | 0 | -4.705557 | -2.081081 | -2.042895 |
| 138 | 1  | 0 | -4.277212 | -2.800013 | -1.314557 |
| 139 | 6  | 0 | -5.944139 | -2.765226 | -2.634060 |
| 140 | 1  | 0 | -6.713329 | -2.910561 | -1.845395 |
| 141 | 1  | 0 | -5.671732 | -3.764932 | -3.035725 |
| 142 | 1  | 0 | -6.385148 | -2.167659 | -3.459555 |
| 143 | 6  | 0 | -3.634602 | -1.859447 | -3.119198 |
| 144 | 1  | 0 | -4.020489 | -1.234283 | -3.952071 |
| 145 | 1  | 0 | -3.305236 | -2.834915 | -3.537241 |
| 146 | 1  | 0 | -2.745463 | -1.359265 | -2.680807 |
| 147 | 20 | 0 | 0.104475  | -0.415869 | -0.019490 |
| 148 | 1  | 0 | -1.236576 | 4.797152  | 1.733040  |

### L3a-Ca(II)-TS1-re-H

Zero-point correction= 1.26919 a.u.

Thermal correction to Gibbs Free Energy= 1.16850 a.u.

Sum of electronic and zero-point Energies= -3659.23958 a.u.

Sum of electronic and thermal Free Energies= -3659.34027 a.u.

The number of imaginary frequencies 1

Standard orientation

| Center<br>Number | Atomic<br>Number | Atomic<br>Type | Coordinates (Angstroms) |          |           |
|------------------|------------------|----------------|-------------------------|----------|-----------|
|                  |                  |                | X                       | Y        | Z         |
| 1                | 6                | 0              | 0.279262                | 3.811296 | -1.057830 |
| 2                | 6                | 0              | 0.400750                | 4.631651 | 0.095901  |
| 3                | 8                | 0              | 1.209699                | 5.650812 | -0.008873 |
| 4                | 6                | 0              | 1.525257                | 6.507534 | 1.121212  |
| 5                | 6                | 0              | -0.222236               | 4.202145 | 1.364244  |
| 6                | 1                | 0              | -0.670809               | 3.288295 | -1.132664 |

|    |   |   |           |           |           |
|----|---|---|-----------|-----------|-----------|
| 7  | 1 | 0 | 0.602854  | 4.279645  | -1.985545 |
| 8  | 1 | 0 | 2.184243  | 7.271419  | 0.710629  |
| 9  | 1 | 0 | 2.042931  | 5.938766  | 1.895587  |
| 10 | 1 | 0 | 0.612966  | 6.962859  | 1.511564  |
| 11 | 1 | 0 | -1.307335 | 4.119884  | 1.240400  |
| 12 | 1 | 0 | 0.005302  | 4.827247  | 2.226525  |
| 13 | 1 | 0 | 0.149116  | 3.166386  | 1.515260  |
| 14 | 6 | 0 | 1.127669  | 1.685812  | -2.122930 |
| 15 | 6 | 0 | 1.389002  | 2.352650  | -0.745723 |
| 16 | 6 | 0 | 2.786929  | 2.896113  | -0.922128 |
| 17 | 6 | 0 | 3.155943  | 2.710828  | -2.265043 |
| 18 | 7 | 0 | 2.136816  | 2.008687  | -2.963667 |
| 19 | 8 | 0 | 0.993596  | 1.685000  | 0.292674  |
| 20 | 8 | 0 | 0.162135  | 0.942903  | -2.353128 |
| 21 | 6 | 0 | 2.209073  | 1.616321  | -4.363549 |
| 22 | 6 | 0 | 3.670961  | 3.491710  | -0.035185 |
| 23 | 6 | 0 | 4.382425  | 3.133834  | -2.757584 |
| 24 | 1 | 0 | 2.109305  | 2.494755  | -5.009707 |
| 25 | 1 | 0 | 1.392586  | 0.921853  | -4.565117 |
| 26 | 1 | 0 | 3.163656  | 1.127308  | -4.574097 |
| 27 | 6 | 0 | 5.262406  | 3.748382  | -1.853292 |
| 28 | 6 | 0 | 4.919740  | 3.920469  | -0.510421 |
| 29 | 1 | 0 | 4.663012  | 2.986407  | -3.795454 |
| 30 | 1 | 0 | 6.232292  | 4.085011  | -2.208247 |
| 31 | 1 | 0 | 5.626773  | 4.382772  | 0.172242  |
| 32 | 8 | 0 | -0.552366 | -2.658515 | -0.343333 |
| 33 | 8 | 0 | 1.864266  | -1.247457 | -0.197350 |
| 34 | 8 | 0 | -1.045869 | -0.482616 | 2.037156  |
| 35 | 7 | 0 | 3.646660  | -2.495676 | 0.447180  |
| 36 | 1 | 0 | 4.033742  | -3.416606 | 0.617277  |
| 37 | 7 | 0 | 0.123940  | -3.627378 | 0.350528  |
| 38 | 7 | 0 | -4.902128 | 0.365368  | 0.341702  |
| 39 | 1 | 0 | -5.599672 | 0.436870  | 1.074103  |
| 40 | 7 | 0 | -2.212416 | -1.010726 | 2.528791  |
| 41 | 6 | 0 | 4.530386  | -1.391909 | 0.455108  |
| 42 | 6 | 0 | 4.648292  | -0.590844 | 1.620232  |
| 43 | 6 | 0 | 5.481286  | 0.542388  | 1.585349  |
| 44 | 1 | 0 | 5.583342  | 1.181584  | 2.452352  |
| 45 | 6 | 0 | 6.190103  | 0.870027  | 0.434048  |
| 46 | 1 | 0 | 6.828701  | 1.743760  | 0.424989  |
| 47 | 6 | 0 | 6.076765  | 0.084286  | -0.708155 |
| 48 | 1 | 0 | 6.630808  | 0.375352  | -1.590716 |
| 49 | 6 | 0 | 5.255548  | -1.057706 | -0.717874 |
| 50 | 6 | 0 | 5.146249  | -1.895867 | -1.987182 |

|    |   |   |           |           |           |
|----|---|---|-----------|-----------|-----------|
| 51 | 1 | 0 | 4.507871  | -2.786774 | -1.815298 |
| 52 | 6 | 0 | 4.482080  | -1.096513 | -3.112033 |
| 53 | 1 | 0 | 3.482703  | -0.740635 | -2.781833 |
| 54 | 1 | 0 | 4.337139  | -1.739785 | -4.006325 |
| 55 | 1 | 0 | 5.101157  | -0.222015 | -3.403912 |
| 56 | 6 | 0 | 6.514845  | -2.432781 | -2.423407 |
| 57 | 1 | 0 | 6.394980  | -3.133942 | -3.277171 |
| 58 | 1 | 0 | 6.990344  | -2.989117 | -1.587177 |
| 59 | 1 | 0 | 7.192873  | -1.612968 | -2.741209 |
| 60 | 6 | 0 | 3.886628  | -0.927616 | 2.898205  |
| 61 | 1 | 0 | 3.326086  | -1.878939 | 2.782343  |
| 62 | 6 | 0 | 4.841523  | -1.138992 | 4.079568  |
| 63 | 1 | 0 | 5.604078  | -1.905277 | 3.823364  |
| 64 | 1 | 0 | 4.277118  | -1.501189 | 4.965604  |
| 65 | 1 | 0 | 5.358296  | -0.197318 | 4.359922  |
| 66 | 6 | 0 | 2.849159  | 0.153249  | 3.218168  |
| 67 | 1 | 0 | 3.329425  | 1.138817  | 3.395344  |
| 68 | 1 | 0 | 2.279332  | -0.127308 | 4.128636  |
| 69 | 1 | 0 | 2.131693  | 0.250698  | 2.376568  |
| 70 | 6 | 0 | 2.357427  | -2.350920 | 0.070835  |
| 71 | 6 | 0 | 1.608929  | -3.676039 | -0.044695 |
| 72 | 1 | 0 | 2.068458  | -4.403275 | 0.631574  |
| 73 | 6 | 0 | 1.555038  | -4.263185 | -1.451969 |
| 74 | 1 | 0 | 2.546473  | -4.566300 | -1.797086 |
| 75 | 1 | 0 | 1.151882  | -3.518951 | -2.144393 |
| 76 | 6 | 0 | 0.599533  | -5.459196 | -1.266359 |
| 77 | 1 | 0 | 1.190278  | -6.332115 | -0.973548 |
| 78 | 6 | 0 | -0.315736 | -5.774748 | -2.469061 |
| 79 | 1 | 0 | 0.156818  | -5.519476 | -3.424039 |
| 80 | 1 | 0 | -0.535349 | -6.849125 | -2.490785 |
| 81 | 6 | 0 | -1.605096 | -4.981334 | -2.198991 |
| 82 | 1 | 0 | -2.467034 | -5.379039 | -2.745260 |
| 83 | 1 | 0 | -1.474395 | -3.933002 | -2.485464 |
| 84 | 6 | 0 | -1.776921 | -5.076647 | -0.672599 |
| 85 | 1 | 0 | -2.419203 | -4.297398 | -0.261987 |
| 86 | 1 | 0 | -2.211379 | -6.048819 | -0.406944 |
| 87 | 6 | 0 | -0.352509 | -5.048700 | -0.099251 |
| 88 | 1 | 0 | -0.235720 | -5.682699 | 0.780709  |
| 89 | 6 | 0 | 0.008303  | -3.409954 | 1.849163  |
| 90 | 1 | 0 | 0.617023  | -4.185862 | 2.322414  |
| 91 | 1 | 0 | 0.453963  | -2.434914 | 2.041656  |
| 92 | 6 | 0 | -1.404837 | -3.474382 | 2.432239  |
| 93 | 1 | 0 | -1.279921 | -3.478377 | 3.521130  |
| 94 | 1 | 0 | -1.854879 | -4.444581 | 2.192631  |

|     |   |   |           |           |           |
|-----|---|---|-----------|-----------|-----------|
| 95  | 6 | 0 | -2.444937 | -2.426661 | 2.029422  |
| 96  | 1 | 0 | -2.496529 | -2.348227 | 0.945421  |
| 97  | 1 | 0 | -3.419743 | -2.735185 | 2.417447  |
| 98  | 6 | 0 | -2.234452 | -0.895759 | 4.088191  |
| 99  | 1 | 0 | -2.842715 | -1.733441 | 4.431744  |
| 100 | 6 | 0 | -0.837718 | -0.863521 | 4.723906  |
| 101 | 1 | 0 | -0.090577 | -1.391907 | 4.130522  |
| 102 | 1 | 0 | -0.913265 | -1.361206 | 5.698864  |
| 103 | 6 | 0 | -0.511562 | 0.628486  | 4.918022  |
| 104 | 1 | 0 | -0.123009 | 1.038142  | 3.980870  |
| 105 | 1 | 0 | 0.235927  | 0.797112  | 5.700664  |
| 106 | 6 | 0 | -1.872947 | 1.261154  | 5.254173  |
| 107 | 1 | 0 | -1.906823 | 2.339907  | 5.064114  |
| 108 | 1 | 0 | -2.102965 | 1.110916  | 6.315852  |
| 109 | 6 | 0 | -2.893654 | 0.486440  | 4.392529  |
| 110 | 1 | 0 | -3.834814 | 0.336690  | 4.929514  |
| 111 | 6 | 0 | -3.214544 | 1.100619  | 3.013956  |
| 112 | 1 | 0 | -2.380138 | 1.687735  | 2.621639  |
| 113 | 1 | 0 | -4.110316 | 1.725889  | 3.034000  |
| 114 | 6 | 0 | -3.418731 | -0.146060 | 2.153963  |
| 115 | 1 | 0 | -4.293248 | -0.687607 | 2.527759  |
| 116 | 6 | 0 | -3.616427 | 0.096681  | 0.657002  |
| 117 | 6 | 0 | -5.270060 | 0.769489  | -0.962704 |
| 118 | 6 | 0 | -5.487455 | -0.206496 | -1.970526 |
| 119 | 6 | 0 | -5.801604 | 0.219251  | -3.273815 |
| 120 | 1 | 0 | -5.963937 | -0.499448 | -4.066019 |
| 121 | 6 | 0 | -5.916826 | 1.573109  | -3.572726 |
| 122 | 1 | 0 | -6.161727 | 1.883103  | -4.580509 |
| 123 | 6 | 0 | -5.723027 | 2.530035  | -2.581648 |
| 124 | 1 | 0 | -5.820778 | 3.574331  | -2.847248 |
| 125 | 6 | 0 | -5.398905 | 2.150254  | -1.266409 |
| 126 | 6 | 0 | -5.176127 | 3.225532  | -0.207199 |
| 127 | 1 | 0 | -4.937710 | 2.766604  | 0.773759  |
| 128 | 6 | 0 | -6.441636 | 4.063341  | 0.008125  |
| 129 | 1 | 0 | -6.291721 | 4.770236  | 0.852294  |
| 130 | 1 | 0 | -7.297622 | 3.402509  | 0.263254  |
| 131 | 1 | 0 | -6.699699 | 4.651733  | -0.897598 |
| 132 | 6 | 0 | -3.981149 | 4.115636  | -0.566093 |
| 133 | 1 | 0 | -3.076704 | 3.489882  | -0.715155 |
| 134 | 1 | 0 | -3.775101 | 4.829935  | 0.259610  |
| 135 | 1 | 0 | -4.170701 | 4.697592  | -1.492728 |
| 136 | 6 | 0 | -5.403480 | -1.699711 | -1.666734 |
| 137 | 1 | 0 | -5.192032 | -1.870920 | -0.590775 |
| 138 | 6 | 0 | -6.737284 | -2.400970 | -1.952499 |

|     |    |   |           |           |           |
|-----|----|---|-----------|-----------|-----------|
| 139 | 1  | 0 | -7.558789 | -1.901789 | -1.395162 |
| 140 | 1  | 0 | -6.690694 | -3.459544 | -1.617819 |
| 141 | 1  | 0 | -6.980246 | -2.390128 | -3.036065 |
| 142 | 6  | 0 | -4.259854 | -2.358726 | -2.445094 |
| 143 | 1  | 0 | -4.428618 | -2.301283 | -3.541053 |
| 144 | 1  | 0 | -4.178245 | -3.428867 | -2.160925 |
| 145 | 1  | 0 | -3.296736 | -1.860132 | -2.205183 |
| 146 | 8  | 0 | -2.713317 | 0.068043  | -0.192187 |
| 147 | 20 | 0 | -0.336851 | -0.297305 | -0.193025 |
| 148 | 1  | 0 | 3.406342  | 3.611387  | 1.012054  |

---

### L3a-Ca(II)-TS2-re-H

Zero-point correction= 1.26959 a.u.

Thermal correction to Gibbs Free Energy= 1.16930 a.u.

Sum of electronic and zero-point Energies= -3659.23831 a.u.

Sum of electronic and thermal Free Energies= -3659.33861 a.u.

The number of imaginary frequencies 1

Standard orientation

---

| Center<br>Number | Atomic<br>Number | Atomic<br>Type | Coordinates (Angstroms) |           |           |
|------------------|------------------|----------------|-------------------------|-----------|-----------|
|                  |                  |                | X                       | Y         | Z         |
| 1                | 6                | 0              | -0.525215               | -3.808416 | -1.328762 |
| 2                | 6                | 0              | -0.382426               | -4.548048 | -0.066881 |
| 3                | 8                | 0              | -1.195064               | -5.566757 | 0.079084  |
| 4                | 6                | 0              | -1.235062               | -6.294929 | 1.332089  |
| 5                | 6                | 0              | 0.359205                | -3.918757 | 0.958638  |
| 6                | 1                | 0              | 0.445997                | -3.449059 | -1.672684 |
| 7                | 1                | 0              | -1.019018               | -4.386539 | -2.109731 |
| 8                | 1                | 0              | -1.847980               | -7.172357 | 1.129095  |
| 9                | 1                | 0              | -1.699803               | -5.679606 | 2.106091  |
| 10               | 1                | 0              | -0.226540               | -6.593153 | 1.627512  |
| 11               | 1                | 0              | 1.318199                | -3.511104 | 0.636652  |
| 12               | 1                | 0              | 0.379731                | -4.364882 | 1.949588  |
| 13               | 1                | 0              | -0.313977               | -2.821549 | 0.847263  |
| 14               | 6                | 0              | -1.206075               | -1.591366 | -2.254049 |
| 15               | 6                | 0              | -1.409338               | -2.456730 | -0.987504 |
| 16               | 6                | 0              | -2.884729               | -2.805123 | -1.097611 |
| 17               | 6                | 0              | -3.328999               | -2.408618 | -2.368307 |
| 18               | 7                | 0              | -2.293016               | -1.710601 | -3.048466 |
| 19               | 8                | 0              | -0.953770               | -1.822361 | 0.131399  |
| 20               | 8                | 0              | -0.202248               | -0.889226 | -2.456570 |
| 21               | 6                | 0              | -2.409898               | -1.134442 | -4.380127 |

|    |   |   |           |           |           |
|----|---|---|-----------|-----------|-----------|
| 22 | 6 | 0 | -3.756998 | -3.436569 | -0.225218 |
| 23 | 6 | 0 | -4.620958 | -2.656041 | -2.811449 |
| 24 | 1 | 0 | -2.338311 | -1.920469 | -5.139568 |
| 25 | 1 | 0 | -1.598259 | -0.419046 | -4.518033 |
| 26 | 1 | 0 | -3.369630 | -0.624849 | -4.489509 |
| 27 | 6 | 0 | -5.490116 | -3.309432 | -1.924905 |
| 28 | 6 | 0 | -5.072174 | -3.686957 | -0.647176 |
| 29 | 1 | 0 | -4.954932 | -2.351066 | -3.797914 |
| 30 | 1 | 0 | -6.509878 | -3.512330 | -2.239659 |
| 31 | 1 | 0 | -5.770317 | -4.173562 | 0.027558  |
| 32 | 8 | 0 | 0.648457  | 2.546239  | -0.181005 |
| 33 | 8 | 0 | -1.831506 | 1.214626  | -0.093729 |
| 34 | 8 | 0 | 0.999523  | 0.191106  | 2.017225  |
| 35 | 7 | 0 | -3.565362 | 2.514624  | 0.594867  |
| 36 | 1 | 0 | -3.906885 | 3.455378  | 0.756940  |
| 37 | 7 | 0 | 0.002583  | 3.487140  | 0.578788  |
| 38 | 7 | 0 | 4.878200  | -0.596082 | 0.349324  |
| 39 | 1 | 0 | 5.593782  | -0.504100 | 1.060968  |
| 40 | 7 | 0 | 2.174372  | 0.617702  | 2.581251  |
| 41 | 6 | 0 | -4.523219 | 1.482281  | 0.464361  |
| 42 | 6 | 0 | -4.692149 | 0.538040  | 1.510148  |
| 43 | 6 | 0 | -5.609949 | -0.513720 | 1.335964  |
| 44 | 1 | 0 | -5.755560 | -1.255618 | 2.109934  |
| 45 | 6 | 0 | -6.353569 | -0.623279 | 0.165655  |
| 46 | 1 | 0 | -7.058228 | -1.436627 | 0.049550  |
| 47 | 6 | 0 | -6.192651 | 0.304024  | -0.858346 |
| 48 | 1 | 0 | -6.776342 | 0.180518  | -1.760862 |
| 49 | 6 | 0 | -5.289729 | 1.374342  | -0.725339 |
| 50 | 6 | 0 | -5.134450 | 2.373281  | -1.867407 |
| 51 | 1 | 0 | -4.440870 | 3.190327  | -1.583427 |
| 52 | 6 | 0 | -4.526508 | 1.698592  | -3.099817 |
| 53 | 1 | 0 | -3.547907 | 1.244517  | -2.834390 |
| 54 | 1 | 0 | -4.349690 | 2.448013  | -3.900822 |
| 55 | 1 | 0 | -5.198129 | 0.908936  | -3.497985 |
| 56 | 6 | 0 | -6.468205 | 3.049625  | -2.208489 |
| 57 | 1 | 0 | -6.305320 | 3.860101  | -2.951084 |
| 58 | 1 | 0 | -6.910212 | 3.504836  | -1.296221 |
| 59 | 1 | 0 | -7.194592 | 2.327976  | -2.637954 |
| 60 | 6 | 0 | -3.912715 | 0.647890  | 2.816594  |
| 61 | 1 | 0 | -3.271942 | 1.554443  | 2.816715  |
| 62 | 6 | 0 | -4.855937 | 0.794089  | 4.016896  |
| 63 | 1 | 0 | -5.545783 | 1.650873  | 3.859706  |
| 64 | 1 | 0 | -4.270268 | 0.992012  | 4.940245  |
| 65 | 1 | 0 | -5.456218 | -0.125894 | 4.177971  |

|     |   |   |           |           |           |
|-----|---|---|-----------|-----------|-----------|
| 66  | 6 | 0 | -2.974593 | -0.548794 | 3.000064  |
| 67  | 1 | 0 | -3.537617 | -1.504394 | 3.053206  |
| 68  | 1 | 0 | -2.395178 | -0.432961 | 3.939606  |
| 69  | 1 | 0 | -2.257647 | -0.600655 | 2.154353  |
| 70  | 6 | 0 | -2.280650 | 2.325993  | 0.216935  |
| 71  | 6 | 0 | -1.472944 | 3.621759  | 0.175970  |
| 72  | 1 | 0 | -1.906021 | 4.327865  | 0.890833  |
| 73  | 6 | 0 | -1.378958 | 4.289738  | -1.193216 |
| 74  | 1 | 0 | -2.351518 | 4.659602  | -1.526533 |
| 75  | 1 | 0 | -1.003699 | 3.571820  | -1.927250 |
| 76  | 6 | 0 | -0.371132 | 5.428160  | -0.928698 |
| 77  | 1 | 0 | -0.925949 | 6.313324  | -0.604216 |
| 78  | 6 | 0 | 0.585484  | 5.760548  | -2.095657 |
| 79  | 1 | 0 | 0.129207  | 5.559896  | -3.071259 |
| 80  | 1 | 0 | 0.839497  | 6.827149  | -2.068286 |
| 81  | 6 | 0 | 1.842885  | 4.915203  | -1.829510 |
| 82  | 1 | 0 | 2.732237  | 5.309419  | -2.332981 |
| 83  | 1 | 0 | 1.687643  | 3.886137  | -2.167287 |
| 84  | 6 | 0 | 1.973809  | 4.934297  | -0.296296 |
| 85  | 1 | 0 | 2.584087  | 4.121420  | 0.097411  |
| 86  | 1 | 0 | 2.424559  | 5.881068  | 0.027467  |
| 87  | 6 | 0 | 0.534455  | 4.917120  | 0.236016  |
| 88  | 1 | 0 | 0.410556  | 5.496625  | 1.152148  |
| 89  | 6 | 0 | 0.089225  | 3.155371  | 2.057914  |
| 90  | 1 | 0 | -0.495852 | 3.918421  | 2.578851  |
| 91  | 1 | 0 | -0.397430 | 2.187603  | 2.170234  |
| 92  | 6 | 0 | 1.492852  | 3.116886  | 2.664075  |
| 93  | 1 | 0 | 1.348212  | 3.045592  | 3.748395  |
| 94  | 1 | 0 | 1.990758  | 4.080082  | 2.504669  |
| 95  | 6 | 0 | 2.490439  | 2.053422  | 2.202122  |
| 96  | 1 | 0 | 2.566195  | 2.058815  | 1.116282  |
| 97  | 1 | 0 | 3.469372  | 2.277977  | 2.634950  |
| 98  | 6 | 0 | 2.146684  | 0.381949  | 4.128070  |
| 99  | 1 | 0 | 2.778846  | 1.163625  | 4.550949  |
| 100 | 6 | 0 | 0.732833  | 0.361124  | 4.725601  |
| 101 | 1 | 0 | 0.022352  | 0.962375  | 4.157206  |
| 102 | 1 | 0 | 0.802167  | 0.781925  | 5.736567  |
| 103 | 6 | 0 | 0.344077  | -1.126413 | 4.800257  |
| 104 | 1 | 0 | -0.030827 | -1.451014 | 3.824824  |
| 105 | 1 | 0 | -0.432168 | -1.321564 | 5.547818  |
| 106 | 6 | 0 | 1.669581  | -1.835884 | 5.124104  |
| 107 | 1 | 0 | 1.666365  | -2.900018 | 4.862430  |
| 108 | 1 | 0 | 1.878391  | -1.766418 | 6.198503  |
| 109 | 6 | 0 | 2.740126  | -1.047102 | 4.340240  |



|     |    |   |           |           |           |
|-----|----|---|-----------|-----------|-----------|
| 110 | 1  | 0 | 3.676943  | -0.980127 | 4.901203  |
| 111 | 6  | 0 | 3.058009  | -1.570731 | 2.924308  |
| 112 | 1  | 0 | 2.198608  | -2.071935 | 2.471538  |
| 113 | 1  | 0 | 3.915179  | -2.248220 | 2.907594  |
| 114 | 6  | 0 | 3.352574  | -0.275440 | 2.172634  |
| 115 | 1  | 0 | 4.236879  | 0.193037  | 2.615561  |
| 116 | 6  | 0 | 3.579463  | -0.409211 | 0.666458  |
| 117 | 6  | 0 | 5.303157  | -0.723277 | -0.993290 |
| 118 | 6  | 0 | 5.740476  | 0.422810  | -1.707474 |
| 119 | 6  | 0 | 6.141151  | 0.277411  | -3.048198 |
| 120 | 1  | 0 | 6.473863  | 1.132346  | -3.622071 |
| 121 | 6  | 0 | 6.114670  | -0.967421 | -3.668786 |
| 122 | 1  | 0 | 6.423498  | -1.061029 | -4.702055 |
| 123 | 6  | 0 | 5.692000  | -2.092439 | -2.968090 |
| 124 | 1  | 0 | 5.680772  | -3.045121 | -3.480974 |
| 125 | 6  | 0 | 5.284226  | -1.994003 | -1.625356 |
| 126 | 6  | 0 | 4.820248  | -3.245937 | -0.887552 |
| 127 | 1  | 0 | 4.553944  | -3.007656 | 0.163244  |
| 128 | 6  | 0 | 5.932616  | -4.298790 | -0.817867 |
| 129 | 1  | 0 | 5.606818  | -5.157217 | -0.192130 |
| 130 | 1  | 0 | 6.842678  | -3.862511 | -0.353375 |
| 131 | 1  | 0 | 6.194113  | -4.683055 | -1.826338 |
| 132 | 6  | 0 | 3.557310  | -3.821838 | -1.536212 |
| 133 | 1  | 0 | 2.783391  | -3.030392 | -1.614879 |
| 134 | 1  | 0 | 3.151020  | -4.650998 | -0.918127 |
| 135 | 1  | 0 | 3.767051  | -4.214228 | -2.553718 |
| 136 | 6  | 0 | 5.771615  | 1.803561  | -1.058822 |
| 137 | 1  | 0 | 5.439620  | 1.749577  | -0.001100 |
| 138 | 6  | 0 | 7.195098  | 2.372748  | -1.032677 |
| 139 | 1  | 0 | 7.881770  | 1.659715  | -0.528261 |
| 140 | 1  | 0 | 7.213989  | 3.327176  | -0.464142 |
| 141 | 1  | 0 | 7.573587  | 2.570382  | -2.057690 |
| 142 | 6  | 0 | 4.808187  | 2.765500  | -1.763084 |
| 143 | 1  | 0 | 5.117073  | 2.955007  | -2.812641 |
| 144 | 1  | 0 | 4.783427  | 3.737883  | -1.226750 |
| 145 | 1  | 0 | 3.781743  | 2.341246  | -1.764074 |
| 146 | 8  | 0 | 2.676284  | -0.403444 | -0.183629 |
| 147 | 20 | 0 | 0.348513  | 0.207797  | -0.245799 |
| 148 | 1  | 0 | -3.433383 | -3.726930 | 0.770158  |

---
